# Supplementary material for: Habit Expression and Disruption as a Function of Attention-Deficit/Hyperactivity Disorder Symptomology
Source: Front Psychol. 2019 Sep 3;10:1997. doi: 10.3389/fpsyg.2019.01997 (PMC6733985; doi:10.3389/fpsyg.2019.01997)
Supplement: Supplementary file 1 [file Data_Sheet_1.ZIP]

Archive with 22 entries (22 files):
- ASRS signal detection analyses.ipynb
- ASRS_Data_Compile.html
- ASRS_Data_Compile.ipynb
- ASRS_Data_R_Share_Supplement.html
- ASRS_Data_R_Share_Supplement.ipynb
- ASRS_Data_R_withBootstrap_Share.html
- ASRS_Data_R_withBootstrap_Share.ipynb
- day1merge_full.csv
- day2merge_full.csv
- df_dprime_long_mm.csv
- df_dprime_wide.csv
- dprime_long.csv
- Exp8_Go_Full.csv
- Exp8_GoRT_Full.csv
- Exp8_NoGo_Full.csv
- gostatssheet_full.csv
- gostatssheetRT_full.csv
- nogostatssheet_full.csv
- README.txt
- Signal detection plots.ipynb
- Signal_detection_analyses.html
- Signal_detection_plots.html
