# Supplementary material for: Habit Expression and Disruption as a Function of Attention-Deficit/Hyperactivity Disorder Symptomology
Source: Front Psychol. 2019 Sep 3;10:1997. doi: 10.3389/fpsyg.2019.01997 (PMC6733985; doi:10.3389/fpsyg.2019.01997)
Supplement: Supplementary file 1 [file Data_Sheet_1.ZIP › ASRS signal detection analyses.ipynb]

# %% [markdown]
## ASRS signal detection analyses

# %% [code]
#Load packages
library(nlme)
#install.packages("MuMIn")
library(MuMIn)
#install.packages("reghelper")
library(reghelper)
#install.packages("car")
library(car)
#install.packages("stats")
library(stats)
#install.packages("lsr")
library(lsr)
#install.packages("psych")
library(psych)
#install.packages("devtools")
library(devtools)
#install_github("easyGgplot2", "kassambara")
library(easyGgplot2)
#install.packages("lme4")
library(lme4)

# %% [markdown]
#### Familiar congruent day 1 phase d prime dataframe

# %% [code]
myNoGoData_d <- read.csv('nogostatssheet_full.csv')
myGoData_d <- read.csv('gostatssheet_full.csv')
#head(myNoGoData_d)
#head(myGoData_d)
df_FamCongNoGo_d <- subset(myNoGoData_d, StimulusType=="Familiar" & Congruency=="Congruent" & FeedbackCond=="NoFeedback")
df_FamCongGo_d <- subset(myGoData_d, StimulusType=="Familiar" & Congruency=="Congruent" & FeedbackCond=="NoFeedback")
df_FamCong_dprime <- data.frame(Subject = df_FamCongNoGo_d[, c("Subject")], Perc_Hit = df_FamCongGo_d[, c("Accuracy")], Perc_FA = (1-df_FamCongNoGo_d[, c("Accuracy")]), Perc_Miss = (1-df_FamCongGo_d[, c("Accuracy")]), Perc_CR = df_FamCongNoGo_d[, c("Accuracy")])
head(df_FamCong_dprime)
nrow(df_FamCong_dprime)

# %% [markdown]
#### Familiar incongruent day 1 phase d prime dataframe

# %% [code]
df_FamIncongNoGo_d <- subset(myNoGoData_d, StimulusType=="Familiar" & Congruency=="Incongruent" & FeedbackCond=="NoFeedback")
df_FamIncongGo_d <- subset(myGoData_d, StimulusType=="Familiar" & Congruency=="Incongruent" & FeedbackCond=="NoFeedback")
df_FamIncong_dprime <- data.frame(Subject = df_FamIncongNoGo_d[, c("Subject")], Perc_Hit = df_FamIncongGo_d[, c("Accuracy")], Perc_FA = (1-df_FamIncongNoGo_d[, c("Accuracy")]), Perc_Miss = (1-df_FamIncongGo_d[, c("Accuracy")]), Perc_CR = df_FamIncongNoGo_d[, c("Accuracy")])
head(df_FamIncong_dprime)
nrow(df_FamIncong_dprime)

# %% [markdown]
#### Novel congruent day 1 phase d prime dataframe

# %% [code]
df_NovCongNoGo_d <- subset(myNoGoData_d, StimulusType=="Novel" & Congruency=="Congruent" & FeedbackCond=="NoFeedback")
df_NovCongGo_d <- subset(myGoData_d, StimulusType=="Novel" & Congruency=="Congruent" & FeedbackCond=="NoFeedback")
df_NovCong_dprime <- data.frame(Subject = df_NovCongNoGo_d[, c("Subject")], Perc_Hit = df_NovCongGo_d[, c("Accuracy")], Perc_FA = (1-df_NovCongNoGo_d[, c("Accuracy")]), Perc_Miss = (1-df_NovCongGo_d[, c("Accuracy")]), Perc_CR = df_NovCongNoGo_d[, c("Accuracy")])
head(df_NovCong_dprime)
nrow(df_NovCong_dprime)

# %% [markdown]
#### Novel incongruent day 1 phase d prime dataframe

# %% [code]
df_NovIncongNoGo_d <- subset(myNoGoData_d, StimulusType=="Novel" & Congruency=="Incongruent" & FeedbackCond=="NoFeedback")
df_NovIncongGo_d <- subset(myGoData_d, StimulusType=="Novel" & Congruency=="Incongruent" & FeedbackCond=="NoFeedback")
df_NovIncong_dprime <- data.frame(Subject = df_NovIncongNoGo_d[, c("Subject")], Perc_Hit = df_NovIncongGo_d[, c("Accuracy")], Perc_FA = (1-df_NovIncongNoGo_d[, c("Accuracy")]), Perc_Miss = (1-df_NovIncongGo_d[, c("Accuracy")]), Perc_CR = df_NovIncongNoGo_d[, c("Accuracy")])
head(df_NovIncong_dprime)
nrow(df_NovIncong_dprime)

# %% [markdown]
#### Familiar congruent day 2 phase d prime dataframe

# %% [code]
df_FamCongNoGoFB_d <- subset(myNoGoData_d, StimulusType=="Familiar" & Congruency=="Congruent" & FeedbackCond=="Feedback")
df_FamCongGoFB_d <- subset(myGoData_d, StimulusType=="Familiar" & Congruency=="Congruent" & FeedbackCond=="Feedback")
df_FamCongFB_dprime <- data.frame(Subject = df_FamCongNoGoFB_d[, c("Subject")], Perc_Hit = df_FamCongGoFB_d[, c("Accuracy")], Perc_FA = (1-df_FamCongNoGoFB_d[, c("Accuracy")]), Perc_Miss = (1-df_FamCongGoFB_d[, c("Accuracy")]), Perc_CR = df_FamCongNoGoFB_d[, c("Accuracy")])
head(df_FamCongFB_dprime)
nrow(df_FamCongFB_dprime)

# %% [markdown]
#### Familiar incongruent day 2 phase d prime dataframe

# %% [code]
df_FamIncongNoGoFB_d <- subset(myNoGoData_d, StimulusType=="Familiar" & Congruency=="Incongruent" & FeedbackCond=="Feedback")
df_FamIncongGoFB_d <- subset(myGoData_d, StimulusType=="Familiar" & Congruency=="Incongruent" & FeedbackCond=="Feedback")
df_FamIncongFB_dprime <- data.frame(Subject = df_FamIncongNoGoFB_d[, c("Subject")], Perc_Hit = df_FamIncongGoFB_d[, c("Accuracy")], Perc_FA = (1-df_FamIncongNoGoFB_d[, c("Accuracy")]), Perc_Miss = (1-df_FamIncongGoFB_d[, c("Accuracy")]), Perc_CR = df_FamIncongNoGoFB_d[, c("Accuracy")])
head(df_FamIncongFB_dprime)
nrow(df_FamIncongFB_dprime)

# %% [markdown]
### Familiar Congruent Day 1 d prime analysis

# %% [code]
#install.packages("psycho")
library(psycho)

# %% [code]
FamCong_dprime_indices <- psycho::dprime(df_FamCong_dprime$Perc_Hit, df_FamCong_dprime$Perc_FA, df_FamCong_dprime$Perc_Miss, df_FamCong_dprime$Perc_CR)
FamCong_dprime <- cbind(df_FamCong_dprime, FamCong_dprime_indices)
head(FamCong_dprime)

# %% [markdown]
### Familiar Incongruent Day 1 d prime analysis

# %% [code]
FamIncong_dprime_indices <- psycho::dprime(df_FamIncong_dprime$Perc_Hit, df_FamIncong_dprime$Perc_FA, df_FamIncong_dprime$Perc_Miss, df_FamIncong_dprime$Perc_CR)
FamIncong_dprime <- cbind(df_FamIncong_dprime, FamIncong_dprime_indices)
head(FamIncong_dprime)

# %% [markdown]
### Novel Congruent Day 1 d prime analysis

# %% [code]
NovCong_dprime_indices <- psycho::dprime(df_NovCong_dprime$Perc_Hit, df_NovCong_dprime$Perc_FA, df_NovCong_dprime$Perc_Miss, df_NovCong_dprime$Perc_CR)
NovCong_dprime <- cbind(df_NovCong_dprime, NovCong_dprime_indices)
head(NovCong_dprime)

# %% [markdown]
### Novel Incongruent Day 1 d prime analysis

# %% [code]
NovIncong_dprime_indices <- psycho::dprime(df_NovIncong_dprime$Perc_Hit, df_NovIncong_dprime$Perc_FA, df_NovIncong_dprime$Perc_Miss, df_NovIncong_dprime$Perc_CR)
NovIncong_dprime <- cbind(df_NovIncong_dprime, NovIncong_dprime_indices)
head(NovIncong_dprime)

# %% [markdown]
### Familiar Congruent Day 2 d prime analysis

# %% [code]
FamCongFB_dprime_indices <- psycho::dprime(df_FamCongFB_dprime$Perc_Hit, df_FamCongFB_dprime$Perc_FA, df_FamCongFB_dprime$Perc_Miss, df_FamCongFB_dprime$Perc_CR)
FamCongFB_dprime <- cbind(df_FamCongFB_dprime, FamCongFB_dprime_indices)
head(FamCongFB_dprime)

# %% [markdown]
### Familiar Incongruent Day 2 d prime analysis

# %% [code]
FamIncongFB_dprime_indices <- psycho::dprime(df_FamIncongFB_dprime$Perc_Hit, df_FamIncongFB_dprime$Perc_FA, df_FamIncongFB_dprime$Perc_Miss, df_FamIncongFB_dprime$Perc_CR)
FamIncongFB_dprime <- cbind(df_FamIncongFB_dprime, FamIncongFB_dprime_indices)
head(FamIncongFB_dprime)

# %% [markdown]
## D prime analysis master sheet

# %% [code]
df_dprime = data.frame(Subject = df_FamCongNoGo_d[, c("Subject")], FamCongDay1_dprime = FamCong_dprime[, ("dprime")], FamIncongDay1_dprime = FamIncong_dprime[, ("dprime")], NovCongDay1_dprime = NovCong_dprime[, ("dprime")], NovIncongDay1_dprime = NovIncong_dprime[, ("dprime")], FamCongDay2_dprime = FamCongFB_dprime[, ("dprime")], FamIncongDay2_dprime = FamIncongFB_dprime[, ("dprime")])
head(df_dprime)
#write to csv so it can be melted in python
#write.csv(df_dprime, file = "df_dprime_wide.csv")

# %% [code]
#read long dprime data from python csv
df_dprime_long <- read.csv("dprime_long.csv")
head(df_dprime_long)

# %% [markdown]
### ANOVAs to compare StimulusType, FeedbackCond, and Congruency with dprime values

# %% [code]
library(ez)
print("Day 1 (no feedback) StimulusType*Congruency interaction of dprime values")
dprime_anova  <- ezANOVA(
    data = subset(df_dprime_long, FeedbackCond=="NoFeedback")
    , dv = .(dprime)
    , wid = .(Subject)
    , within = .(StimulusType, Congruency)
    , type = 1
)
print(dprime_anova)

print("Day 2 (feedback) FeedbackCond*Congruency interaction of dprime values")
dprime_anova_fb  <- ezANOVA(
    data = subset(df_dprime_long, StimulusType=="Familiar")
    , dv = .(dprime)
    , wid = .(Subject)
    , within = .(FeedbackCond, Congruency)
    , type = 1
)
print(dprime_anova_fb)

# %% [markdown]
#### Post hoc t-tests across phases and conditions

# %% [code]
print("Familiar stimuli, congruent vs. incongruent paired t-test")
t.test(subset(df_dprime_long, StimulusType=="Familiar" & FeedbackCond=="NoFeedback" & Congruency=="Congruent")$dprime, subset(df_dprime_long, StimulusType=="Familiar" & FeedbackCond=="NoFeedback" & Congruency=="Incongruent")$dprime, paired=TRUE)[1:3]
print("Novel stimuli, congruent vs. incongruent paired t-test")
t.test(subset(df_dprime_long, StimulusType=="Novel" & FeedbackCond=="NoFeedback" & Congruency=="Congruent")$dprime, subset(df_dprime_long, StimulusType=="Novel" & FeedbackCond=="NoFeedback" & Congruency=="Incongruent")$dprime, paired=TRUE)[1:3]
print("Congruent phase, Familiar vs. Novel paired t-test")
t.test(subset(df_dprime_long, StimulusType=="Familiar" & FeedbackCond=="NoFeedback" & Congruency=="Congruent")$dprime, subset(df_dprime_long, StimulusType=="Novel" & FeedbackCond=="NoFeedback" & Congruency=="Congruent")$dprime, paired=TRUE)[1:3]
print("Incongruent phase, Familiar vs. Novel paired t-test")
t.test(subset(df_dprime_long, StimulusType=="Familiar" & FeedbackCond=="NoFeedback" & Congruency=="Incongruent")$dprime, subset(df_dprime_long, StimulusType=="Novel" & FeedbackCond=="NoFeedback" & Congruency=="Incongruent")$dprime, paired=TRUE)[1:3]
print("Familiar stimuli, Feedback condition, congruent vs. incongruent paired t-test")
t.test(subset(df_dprime_long, StimulusType=="Familiar" & FeedbackCond=="Feedback" & Congruency=="Congruent")$dprime, subset(df_dprime_long, StimulusType=="Familiar" & FeedbackCond=="Feedback" & Congruency=="Incongruent")$dprime, paired=TRUE)[1:3]

# %% [code]
summary(subset(df_dprime_long, FeedbackCond=="NoFeedback" & Congruency=="Congruent" & StimulusType=="Familiar")$dprime)
summary(subset(df_dprime_long, FeedbackCond=="NoFeedback" & Congruency=="Incongruent" & StimulusType=="Familiar")$dprime)
summary(subset(df_dprime_long, FeedbackCond=="NoFeedback" & Congruency=="Congruent" & StimulusType=="Novel")$dprime)
summary(subset(df_dprime_long, FeedbackCond=="NoFeedback" & Congruency=="Incongruent" & StimulusType=="Novel")$dprime)
summary(subset(df_dprime_long, FeedbackCond=="Feedback" & Congruency=="Congruent" & StimulusType=="Familiar")$dprime)
summary(subset(df_dprime_long, FeedbackCond=="Feedback" & Congruency=="Incongruent" & StimulusType=="Familiar")$dprime)

# %% [markdown]
### Mixed models using dprime data with individual difference measures

# %% [code]
##take individual difference variables from Exp8_NoGo_Full.csv, join them with the dprime long dataframe
#head(read.csv("Exp8_NoGo_Full.csv"))
idvar <- read.csv("Exp8_NoGo_Full.csv")[, 5:14]
idvar_long <- rbind(idvar,idvar[])
df_dprime_long_mm <- cbind(df_dprime_long, idvar_long)
nrow(df_dprime_long_mm)
ncol(df_dprime_long_mm)
df_dprime_long_mm$X <- NULL
head(df_dprime_long_mm)
#write.csv(df_dprime_long_mm, file="df_dprime_long_mm.csv")

# %% [code]
#Day 1 model with dprime
dprime_nofb_model1_r <- lme(dprime ~ Gender + Cong_Order + Drive, random=~1|Subject, method="ML", data=subset(df_dprime_long_mm, FeedbackCond=="NoFeedback"))
dprime_nofb_model2_r <- lme(dprime ~ Gender + Cong_Order + Drive + ASRS_A + ASRS_B + Diagnosis + COHS, random=~1|Subject, method="ML", data=subset(df_dprime_long_mm, FeedbackCond=="NoFeedback"))
dprime_nofb_model3_r <- lme(dprime ~ Gender + Cong_Order + Drive + ASRS_A + ASRS_B + Diagnosis + COHS + StimulusType + Congruency + StimulusType*Congruency, random=~1|Subject, method="ML", data=subset(df_dprime_long_mm, FeedbackCond=="NoFeedback"))
dprime_nofb_model4_r <- lme(dprime ~ Gender + Cong_Order + Drive + ASRS_A + ASRS_B + Diagnosis + COHS + StimulusType + Congruency + StimulusType*Congruency + ASRS_A*StimulusType*Congruency + ASRS_B*StimulusType*Congruency + Diagnosis*StimulusType*Congruency + COHS*StimulusType*Congruency, random=~1|Subject, method="ML", data=subset(df_dprime_long_mm, FeedbackCond=="NoFeedback"))

# %% [code]
#Check for outliers, beyond -3.3<x<3.3. No output means no outliers.
which(abs(residuals(dprime_nofb_model1_r, type="normalized")) > 3.3)
which(abs(residuals(dprime_nofb_model2_r, type="normalized")) > 3.3)
which(abs(residuals(dprime_nofb_model3_r, type="normalized")) > 3.3)
which(abs(residuals(dprime_nofb_model4_r, type="normalized")) > 3.3)

# %% [code]
#Diagnostics. plot() checks for homoscedasticity violation, qqplot() checks for normality, vif() checks for multicollinearity
qqnorm(resid(dprime_nofb_model1_r))
qqnorm(resid(dprime_nofb_model2_r))
qqnorm(resid(dprime_nofb_model3_r))
qqnorm(resid(dprime_nofb_model4_r))
plot(dprime_nofb_model1_r)
plot(dprime_nofb_model2_r)
plot(dprime_nofb_model3_r)
plot(dprime_nofb_model4_r)

# %% [code]
vif(dprime_nofb_model1_r)
vif(dprime_nofb_model2_r)
vif(dprime_nofb_model3_r)
vif(dprime_nofb_model4_r)

# %% [code]
#Use beta from reghelper, otherwise beta coefs won't be standardized
beta(dprime_nofb_model1_r)
beta(dprime_nofb_model2_r)
beta(dprime_nofb_model3_r)
beta(dprime_nofb_model4_r)

# %% [code]
#Extract the R^2 value of each model
r.squaredGLMM(dprime_nofb_model1_r)
r.squaredGLMM(dprime_nofb_model2_r)
r.squaredGLMM(dprime_nofb_model3_r)
r.squaredGLMM(dprime_nofb_model4_r)

# %% [code]
#Subtract from each other to derive delta R^2. First will be 2-1, next 3-2. 
r.squaredGLMM(dprime_nofb_model2_r) - r.squaredGLMM(dprime_nofb_model1_r)
r.squaredGLMM(dprime_nofb_model3_r) - r.squaredGLMM(dprime_nofb_model2_r)
r.squaredGLMM(dprime_nofb_model4_r) - r.squaredGLMM(dprime_nofb_model3_r)

# %% [code]
#Compare the models to each other to extract log likelihood ratio Chi^2 values and the associated p-values. 
#Df is however many new variables are added to next model.
anova(dprime_nofb_model1_r, dprime_nofb_model2_r, dprime_nofb_model3_r, dprime_nofb_model4_r)

# %% [markdown]
### Day 2 (feedback) data mixed model

# %% [code]
#Day 1 model with dprime
dprime_fb_model1_r <- lme(dprime ~ Gender + Cong_Order + Drive, random=~1|Subject, method="ML", data=subset(df_dprime_long_mm, StimulusType=="Familiar"))
dprime_fb_model2_r <- lme(dprime ~ Gender + Cong_Order + Drive + ASRS_A + ASRS_B + Diagnosis + COHS, random=~1|Subject, method="ML", data=subset(df_dprime_long_mm, StimulusType=="Familiar"))
dprime_fb_model3_r <- lme(dprime ~ Gender + Cong_Order + Drive + ASRS_A + ASRS_B + Diagnosis + COHS + FeedbackCond + Congruency + FeedbackCond*Congruency, random=~1|Subject, method="ML", data=subset(df_dprime_long_mm, StimulusType=="Familiar"))
dprime_fb_model4_r <- lme(dprime ~ Gender + Cong_Order + Drive + ASRS_A + ASRS_B + Diagnosis + COHS + FeedbackCond + Congruency + FeedbackCond*Congruency + ASRS_A*FeedbackCond*Congruency + ASRS_B*FeedbackCond*Congruency + Diagnosis*FeedbackCond*Congruency + COHS*FeedbackCond*Congruency, random=~1|Subject, method="ML", data=subset(df_dprime_long_mm, StimulusType=="Familiar"))

# %% [code]
#Check for outliers, beyond -3.3<x<3.3. No output means no outliers.
which(abs(residuals(dprime_fb_model1_r, type="normalized")) > 3.3)
which(abs(residuals(dprime_fb_model2_r, type="normalized")) > 3.3)
which(abs(residuals(dprime_fb_model3_r, type="normalized")) > 3.3)
which(abs(residuals(dprime_fb_model4_r, type="normalized")) > 3.3)

# %% [code]
#Diagnostics. plot() checks for homoscedasticity violation, qqplot() checks for normality, vif() checks for multicollinearity
qqnorm(resid(dprime_fb_model1_r))
qqnorm(resid(dprime_fb_model2_r))
qqnorm(resid(dprime_fb_model3_r))
qqnorm(resid(dprime_fb_model4_r))
plot(dprime_fb_model1_r)
plot(dprime_fb_model2_r)
plot(dprime_fb_model3_r)
plot(dprime_fb_model4_r)

# %% [code]
vif(dprime_fb_model1_r)
vif(dprime_fb_model2_r)
vif(dprime_fb_model3_r)
vif(dprime_fb_model4_r)

# %% [code]
#Use beta from reghelper, otherwise beta coefs won't be standardized
beta(dprime_fb_model1_r)
beta(dprime_fb_model2_r)
beta(dprime_fb_model3_r)
beta(dprime_fb_model4_r)

# %% [code]
#Extract the R^2 value of each model
r.squaredGLMM(dprime_fb_model1_r)
r.squaredGLMM(dprime_fb_model2_r)
r.squaredGLMM(dprime_fb_model3_r)
r.squaredGLMM(dprime_fb_model4_r)

# %% [code]
#Subtract from each other to derive delta R^2. First will be 2-1, next 3-2. 
r.squaredGLMM(dprime_fb_model2_r) - r.squaredGLMM(dprime_fb_model1_r)
r.squaredGLMM(dprime_fb_model3_r) - r.squaredGLMM(dprime_fb_model2_r)
r.squaredGLMM(dprime_fb_model4_r) - r.squaredGLMM(dprime_fb_model3_r)

# %% [code]
#Compare the models to each other to extract log likelihood ratio Chi^2 values and the associated p-values. 
#Df is however many new variables are added to next model.
anova(dprime_fb_model1_r, dprime_fb_model2_r, dprime_fb_model3_r, dprime_fb_model4_r)
