# Supplementary material for: Habit Expression and Disruption as a Function of Attention-Deficit/Hyperactivity Disorder Symptomology
Source: Front Psychol. 2019 Sep 3;10:1997. doi: 10.3389/fpsyg.2019.01997 (PMC6733985; doi:10.3389/fpsyg.2019.01997)
Supplement: Supplementary file 1 [file Data_Sheet_1.ZIP › ASRS_Data_R_Share_Supplement.ipynb]

# %% [markdown]
# Habit Demonstration and Disruption as a Function of ADHD Symptom Severity study 
# Supplemental analysis notebook (as pre-registered)
### Analyses included here violate assumptions of independence. See main text analysis notebook for adjusted regressions

# %% [code]
library(nlme)
#install.packages("MuMIn")
library(MuMIn)
#install.packages("reghelper")
library(reghelper)
#install.packages("car")
library(car)
#install.packages("stats")
library(stats)
#install.packages("lsr")
library(lsr)
#install.packages("psych")
library(psych)
#install.packages("devtools")
library(devtools)
#install_github("easyGgplot2", "kassambara")
library(easyGgplot2)
#install.packages("lme4")
library(lme4)

# %% [code]
#Read csv with NoGo information (Days 1 and 2)
myNoGoData <- read.csv('Exp8_NoGo_Full.csv')

# %% [markdown]
## First set of analyses will involve habit expression and ADHD symptomology. We need Day 1 data (as in, the data where participants receive no motivation enhancement)

# %% [code]
#Take subset of dataframe to analyze Day 1 data (Familiar and Novel NoFeedback)
myNoGoDay1Data <- subset(myNoGoData, FeedbackCond=="NoFeedback")

# %% [markdown]
### Run a linear mixed model in a hierarchical structure. We will determine whether each additional step of the model significantly contributes to predicting outcome-sensitivity

# %% [code]
#Use ML instead of REML becuase we're concerned with comparing fixed effects between models.
nogo_nofb_model1 <- lme(Acc_Diff ~ Age + Gender + Cong_Order + Stim_Order + Drive, random=~1|Subject, method="ML", data=myNoGoDay1Data)
nogo_nofb_model2 <- lme(Acc_Diff ~ Age + Gender + Cong_Order + Stim_Order + Drive + ASRS_A + ASRS_B + ASRS_Total + Diagnosis + COHS, random=~1|Subject, method="ML", data=myNoGoDay1Data)
nogo_nofb_model3 <- lme(Acc_Diff ~ Age + Gender + Cong_Order + Stim_Order + Drive + ASRS_A + ASRS_B + ASRS_Total + Diagnosis + COHS + StimulusType, random=~1|Subject, method="ML", data=myNoGoDay1Data)
nogo_nofb_model4 <- lme(Acc_Diff ~ Age + Gender + Cong_Order + Stim_Order + Drive + ASRS_A + ASRS_B + ASRS_Total + Diagnosis + COHS + StimulusType + ASRS_A*StimulusType + ASRS_B*StimulusType + ASRS_Total*StimulusType + Diagnosis*StimulusType + COHS*StimulusType, random=~1|Subject, method="ML", data=myNoGoDay1Data)

# %% [code]
#Check for outliers, beyond -3.3<x<3.3. No output means no outliers.
which(abs(residuals(nogo_nofb_model1, type="normalized")) > 3.3)
which(abs(residuals(nogo_nofb_model2, type="normalized")) > 3.3)
which(abs(residuals(nogo_nofb_model3, type="normalized")) > 3.3)
which(abs(residuals(nogo_nofb_model4, type="normalized")) > 3.3)

# %% [code]
#Diagnostics. plot() checks for homoscedasticity violation, qqplot() checks for normality, vif() checks for multicollinearity
qqnorm(resid(nogo_nofb_model1))
qqnorm(resid(nogo_nofb_model2))
qqnorm(resid(nogo_nofb_model3))
qqnorm(resid(nogo_nofb_model4))
plot(nogo_nofb_model1)
plot(nogo_nofb_model2)
plot(nogo_nofb_model3)
plot(nogo_nofb_model4)

# %% [code]
vif(nogo_nofb_model1)
vif(nogo_nofb_model2)
vif(nogo_nofb_model3)
vif(nogo_nofb_model4)

# %% [code]
#Use beta from reghelper, otherwise beta coefs won't be standardized
beta(nogo_nofb_model1)
beta(nogo_nofb_model2)
beta(nogo_nofb_model3)
beta(nogo_nofb_model4)

# %% [code]
#Extract the R^2 value of each model
r.squaredGLMM(nogo_nofb_model1)
r.squaredGLMM(nogo_nofb_model2)
r.squaredGLMM(nogo_nofb_model3)
r.squaredGLMM(nogo_nofb_model4)

# %% [code]
#Subtract from each other to derive delta R^2. First will be 2-1, next 3-2. 
r.squaredGLMM(nogo_nofb_model2) - r.squaredGLMM(nogo_nofb_model1)
r.squaredGLMM(nogo_nofb_model3) - r.squaredGLMM(nogo_nofb_model2)
r.squaredGLMM(nogo_nofb_model4) - r.squaredGLMM(nogo_nofb_model3)

# %% [code]
#Compare the models to each other to extract log likelihood ratio Chi^2 values and the associated p-values. 
#Df is how many new variables are added to next model.
anova(nogo_nofb_model1, nogo_nofb_model2, nogo_nofb_model3, nogo_nofb_model4)

# %% [markdown]
## Second set of analysis will involve habit disruption, therefore data from both days, but Familiar condition only

# %% [code]
#Take subset of dataframe to analyze Familiar data (Feedback and NoFeedback). We'll call it "myNoGoDay2Data" for consistency.
myNoGoDay2Data <- subset(myNoGoData, StimulusType=="Familiar")

# %% [markdown]
### Similarly, run mixed models with ML estimations to compare fixed effects, using subject as the random factor.

# %% [code]
nogo_fb_model1 <- lme(Acc_Diff ~ Age + Gender + Cong_Order + Stim_Order + Drive, random=~1|Subject, method="ML", data=myNoGoDay2Data)
nogo_fb_model2 <- lme(Acc_Diff ~ Age + Gender + Cong_Order + Stim_Order + Drive + ASRS_A + ASRS_B + ASRS_Total + Diagnosis + COHS, random=~1|Subject, method="ML", data=myNoGoDay2Data)
nogo_fb_model3 <- lme(Acc_Diff ~ Age + Gender + Cong_Order + Stim_Order + Drive + ASRS_A + ASRS_B + ASRS_Total + Diagnosis + COHS + FeedbackCond, random=~1|Subject, method="ML", data=myNoGoDay2Data)
nogo_fb_model4 <- lme(Acc_Diff ~ Age + Gender + Cong_Order + Stim_Order + Drive + ASRS_A + ASRS_B + ASRS_Total + Diagnosis + COHS + FeedbackCond + ASRS_A*FeedbackCond + ASRS_B*FeedbackCond + ASRS_Total*FeedbackCond + Diagnosis*FeedbackCond + COHS*FeedbackCond, random=~1|Subject, method="ML", data=myNoGoDay2Data)

# %% [code]
#Check for outliers, beyond -3.3<x<3.3. No output means no outliers.
which(abs(residuals(nogo_fb_model1, type="normalized")) > 3.3)
which(abs(residuals(nogo_fb_model2, type="normalized")) > 3.3)
which(abs(residuals(nogo_fb_model3, type="normalized")) > 3.3)
which(abs(residuals(nogo_fb_model4, type="normalized")) > 3.3)

# %% [code]
#Diagnostics. plot() checks for homoscedasticity violation, qqplot() checks for normality, vif() checks for multicollinearity
qqnorm(resid(nogo_fb_model1))
qqnorm(resid(nogo_fb_model2))
qqnorm(resid(nogo_fb_model3))
qqnorm(resid(nogo_fb_model4))
plot(nogo_fb_model1)
plot(nogo_fb_model2)
plot(nogo_fb_model3)
plot(nogo_fb_model4)

# %% [code]
vif(nogo_fb_model1)
vif(nogo_fb_model2)
vif(nogo_fb_model3)
vif(nogo_fb_model4)

# %% [code]
beta(nogo_fb_model1)
beta(nogo_fb_model2)
beta(nogo_fb_model3)
beta(nogo_fb_model4)

# %% [code]
#Extract the R^2 value of each model
r.squaredGLMM(nogo_fb_model1)
r.squaredGLMM(nogo_fb_model2)
r.squaredGLMM(nogo_fb_model3)
r.squaredGLMM(nogo_fb_model4)

# %% [code]
#Subtract from each other to derive delta R^2. First will be 2-1, next 3-2. 
r.squaredGLMM(nogo_fb_model2) - r.squaredGLMM(nogo_fb_model1)
r.squaredGLMM(nogo_fb_model3) - r.squaredGLMM(nogo_fb_model2)
r.squaredGLMM(nogo_fb_model4) - r.squaredGLMM(nogo_fb_model3)

# %% [code]
#Compare models
anova(nogo_fb_model1, nogo_fb_model2, nogo_fb_model3, nogo_fb_model4)

# %% [markdown]
## Same analyses with Go accuracy difference as DV. For that, we'll need to read the csv with Go information.

# %% [code]
#Read csv with Go information (Days 1 and 2)
myGoData <- read.csv('Exp8_Go_Full.csv')

# %% [markdown]
### First, habit expression and ADHD symptomology analyses using Day 1 data.

# %% [code]
#Take subset of dataframe to analyze Day 1 data (Familiar and Novel NoFeedback)
#Having inspected the day 1 standardized residuals, subjects 76, 79, 101, and 106 are outside the -3.3<x<3.3 range, thus day 1 outliers
myGoDay1Data <- subset(myGoData, FeedbackCond=="NoFeedback")

# %% [code]
go_nofb_model1 <- lme(Acc_Diff ~ Age + Gender + Cong_Order + Stim_Order + Drive, random=~1|Subject, method="ML", data=myGoDay1Data)
go_nofb_model2 <- lme(Acc_Diff ~ Age + Gender + Cong_Order + Stim_Order + Drive + ASRS_A + ASRS_B + ASRS_Total + Diagnosis + COHS, random=~1|Subject, method="ML", data=myGoDay1Data)
go_nofb_model3 <- lme(Acc_Diff ~ Age + Gender + Cong_Order + Stim_Order + Drive + ASRS_A + ASRS_B + ASRS_Total + Diagnosis + COHS + StimulusType, random=~1|Subject, method="ML", data=myGoDay1Data)
go_nofb_model4 <- lme(Acc_Diff ~ Age + Gender + Cong_Order + Stim_Order + Drive + ASRS_A + ASRS_B + ASRS_Total + Diagnosis + COHS + StimulusType + ASRS_A*StimulusType + ASRS_B*StimulusType + ASRS_Total*StimulusType + Diagnosis*StimulusType + COHS*StimulusType, random=~1|Subject, method="ML", data=myGoDay1Data)

# %% [code]
#Check for outliers, beyond -3.3<x<3.3. No output means no outliers.
which(abs(residuals(go_nofb_model1, type="normalized")) > 3.3)
which(abs(residuals(go_nofb_model2, type="normalized")) > 3.3)
which(abs(residuals(go_nofb_model3, type="normalized")) > 3.3)
which(abs(residuals(go_nofb_model4, type="normalized")) > 3.3)

# %% [code]
#Ran the following analyses with and without these outliers, and saw no difference. Therefore, the below outliers include complete dataset.
#myGoDay1Data <- subset(myGoDay1Data, Subject!=76 & Subject!=79 & Subject!=106)
go_nofb_model1 <- lme(Acc_Diff ~ Age + Gender + Cong_Order + Stim_Order + Drive, random=~1|Subject, method="ML", data=myGoDay1Data)
go_nofb_model2 <- lme(Acc_Diff ~ Age + Gender + Cong_Order + Stim_Order + Drive + ASRS_A + ASRS_B + ASRS_Total + Diagnosis + COHS, random=~1|Subject, method="ML", data=myGoDay1Data)
go_nofb_model3 <- lme(Acc_Diff ~ Age + Gender + Cong_Order + Stim_Order + Drive + ASRS_A + ASRS_B + ASRS_Total + Diagnosis + COHS + StimulusType, random=~1|Subject, method="ML", data=myGoDay1Data)
go_nofb_model4 <- lme(Acc_Diff ~ Age + Gender + Cong_Order + Stim_Order + Drive + ASRS_A + ASRS_B + ASRS_Total + Diagnosis + COHS + StimulusType + ASRS_A*StimulusType + ASRS_B*StimulusType + ASRS_Total*StimulusType + Diagnosis*StimulusType + COHS*StimulusType, random=~1|Subject, method="ML", data=myGoDay1Data)

# %% [code]
#Diagnostics. plot() checks for homoscedasticity violation, qqplot() checks for normality, vif() checks for multicollinearity
qqnorm(resid(go_nofb_model1))
qqnorm(resid(go_nofb_model2))
qqnorm(resid(go_nofb_model3))
qqnorm(resid(go_nofb_model4))
plot(go_nofb_model1)
plot(go_nofb_model2)
plot(go_nofb_model3)
plot(go_nofb_model4)

# %% [code]
vif(go_nofb_model1)
vif(go_nofb_model2)
vif(go_nofb_model3)
vif(go_nofb_model4)

# %% [code]
beta(go_nofb_model1)
beta(go_nofb_model2)
beta(go_nofb_model3)
beta(go_nofb_model4)

# %% [code]
#Extract the R^2 value of each model
r.squaredGLMM(go_nofb_model1)
r.squaredGLMM(go_nofb_model2)
r.squaredGLMM(go_nofb_model3)
r.squaredGLMM(go_nofb_model4)

# %% [code]
#Subtract from each other to derive delta R^2. First will be 2-1, next 3-2. 
r.squaredGLMM(go_nofb_model2) - r.squaredGLMM(go_nofb_model1)
r.squaredGLMM(go_nofb_model3) - r.squaredGLMM(go_nofb_model2)
r.squaredGLMM(go_nofb_model4) - r.squaredGLMM(go_nofb_model3)

# %% [code]
#Compare models
anova(go_nofb_model1, go_nofb_model2, go_nofb_model3, go_nofb_model4)

# %% [markdown]
### Second set of Go analysis: habit disruption, days 1 and 2, Familiar condition only

# %% [code]
#Take subset of dataframe to analyze Familiar data (Feedback and NoFeedback). We'll call it "myGoDay2Data" for consistency.
myGoDay2Data <- subset(myGoData, StimulusType=="Familiar")

# %% [code]
go_fb_model1 <- lme(Acc_Diff ~ Age + Gender + Cong_Order + Stim_Order + Drive, random=~1|Subject, method="ML", data=myGoDay2Data)
go_fb_model2 <- lme(Acc_Diff ~ Age + Gender + Cong_Order + Stim_Order + Drive + ASRS_A + ASRS_B + ASRS_Total + Diagnosis + COHS, random=~1|Subject, method="ML", data=myGoDay2Data)
go_fb_model3 <- lme(Acc_Diff ~ Age + Gender + Cong_Order + Stim_Order + Drive + ASRS_A + ASRS_B + ASRS_Total + Diagnosis + COHS + FeedbackCond, random=~1|Subject, method="ML", data=myGoDay2Data)
go_fb_model4 <- lme(Acc_Diff ~ Age + Gender + Cong_Order + Stim_Order + Drive + ASRS_A + ASRS_B + ASRS_Total + Diagnosis + COHS + FeedbackCond + ASRS_A*FeedbackCond + ASRS_B*FeedbackCond + ASRS_Total*FeedbackCond + Diagnosis*FeedbackCond + COHS*FeedbackCond, random=~1|Subject, method="ML", data=myGoDay2Data)

# %% [code]
#Check for outliers
which(abs(residuals(go_fb_model1, type="normalized"))>3.3)
which(abs(residuals(go_fb_model2, type="normalized"))>3.3)
which(abs(residuals(go_fb_model3, type="normalized"))>3.3)
which(abs(residuals(go_fb_model4, type="normalized"))>3.3)

# %% [code]
#Outliers make no difference - include in model
#myGoDay2Data <- subset(myGoDay2Data, Subject!=72 & Subject!=79)
go_fb_model1 <- lme(Acc_Diff ~ Age + Gender + Cong_Order + Stim_Order + Drive, random=~1|Subject, method="ML", data=myGoDay2Data)
go_fb_model2 <- lme(Acc_Diff ~ Age + Gender + Cong_Order + Stim_Order + Drive + ASRS_A + ASRS_B + ASRS_Total + Diagnosis + COHS, random=~1|Subject, method="ML", data=myGoDay2Data)
go_fb_model3 <- lme(Acc_Diff ~ Age + Gender + Cong_Order + Stim_Order + Drive + ASRS_A + ASRS_B + ASRS_Total + Diagnosis + COHS + FeedbackCond, random=~1|Subject, method="ML", data=myGoDay2Data)
go_fb_model4 <- lme(Acc_Diff ~ Age + Gender + Cong_Order + Stim_Order + Drive + ASRS_A + ASRS_B + ASRS_Total + Diagnosis + COHS + FeedbackCond + ASRS_A*FeedbackCond + ASRS_B*FeedbackCond + ASRS_Total*FeedbackCond + Diagnosis*FeedbackCond + COHS*FeedbackCond, random=~1|Subject, method="ML", data=myGoDay2Data)

# %% [code]
#Diagnostics. plot() checks for homoscedasticity violation, qqplot() checks for normality, vif() checks for multicollinearity
qqnorm(resid(go_fb_model1))
qqnorm(resid(go_fb_model2))
qqnorm(resid(go_fb_model3))
qqnorm(resid(go_fb_model4))
plot(go_fb_model1)
plot(go_fb_model2)
plot(go_fb_model3)
plot(go_fb_model4)

# %% [code]
vif(go_nofb_model1)
vif(go_nofb_model2)
vif(go_nofb_model3)
vif(go_nofb_model4)

# %% [code]
beta(go_fb_model1)
beta(go_fb_model2)
beta(go_fb_model3)
beta(go_fb_model4)

# %% [code]
#Extract the R^2 value of each model
r.squaredGLMM(go_fb_model1)
r.squaredGLMM(go_fb_model2)
r.squaredGLMM(go_fb_model3)
r.squaredGLMM(go_fb_model4)

# %% [code]
#Subtract from each other to derive delta R^2. First will be 2-1, next 3-2. 
r.squaredGLMM(go_fb_model2) - r.squaredGLMM(go_fb_model1)
r.squaredGLMM(go_fb_model3) - r.squaredGLMM(go_fb_model2)
r.squaredGLMM(go_fb_model4) - r.squaredGLMM(go_fb_model3)

# %% [code]
#Compare models
anova(go_fb_model1, go_fb_model2, go_fb_model3, go_fb_model4)

# %% [code]
