# Supplementary material for: Habit Expression and Disruption as a Function of Attention-Deficit/Hyperactivity Disorder Symptomology
Source: Front Psychol. 2019 Sep 3;10:1997. doi: 10.3389/fpsyg.2019.01997 (PMC6733985; doi:10.3389/fpsyg.2019.01997)
Supplement: Supplementary file 1 [file Data_Sheet_1.ZIP › day1merge_full.csv]

ExperimentName	Subject	SubTrial	Procedure[SubTrial]	totalpoints	totalpoints2	GoBlueRev.ACC	GoBlueRev1.ACC	GoGreen.ACC	GoGreen1.ACC	GoRedRev.ACC	GoRedRev1.ACC	GoViolet.ACC	GoViolet1.ACC	NoGoBlue.ACC	NoGoBlue1.ACC	NoGoGreenRev.ACC	NoGoGreenRev1.ACC	NoGoRed.ACC	NoGoRed1.ACC	NoGoVioletRev.ACC	NoGoVioletRev1.ACC	GoBlueRev.RT	GoBlueRev1.RT	GoGreen.RT	GoGreen1.RT	GoRedRev.RT	GoRedRev1.RT	GoViolet.RT	GoViolet1.RT	NoGoBlue.RT	NoGoBlue1.RT	NoGoGreenRev.RT	NoGoGreenRev1.RT	NoGoRed.RT	NoGoRed1.RT	NoGoVioletRev.RT	NoGoVioletRev1.RT
FamCongFirst	1	2	XGo	70				1																343
FamCongFirst	1	3	XGo	70				1																372
FamCongFirst	1	4	XGo	70				0																0
FamCongFirst	1	5	XGo	70				1																349
FamCongFirst	1	6	XGo	70				1																276
FamCongFirst	1	7	XGo	70				1																285
FamCongFirst	1	8	XNoGo	70														0																301
FamCongFirst	1	9	XGo	70				1																373
FamCongFirst	1	10	XGo	70				1																338
FamCongFirst	1	11	XNoGo	70														1																0
FamCongFirst	1	12	XGo	70				1																378
FamCongFirst	1	13	XGo	70				1																374
FamCongFirst	1	14	XGo	70				1																283
FamCongFirst	1	15	XGo	70				1																299
FamCongFirst	1	16	XGo	70				1																364
FamCongFirst	1	17	XNoGo	70														1																0
FamCongFirst	1	18	XGo	70				1																318
FamCongFirst	1	19	XGo	70				1																357
FamCongFirst	1	20	XNoGo	70														1																0
FamCongFirst	1	21	XGo	70				1																396
FamCongFirst	1	22	XGo	70				1																384
FamCongFirst	1	23	XGo	70				0																0
FamCongFirst	1	24	XGo	70				1																385
FamCongFirst	1	25	XGo	70				1																277
FamCongFirst	1	26	XGo	70				1																327
FamCongFirst	1	27	XGo	70				1																365
FamCongFirst	1	28	XGo	70				1																394
FamCongFirst	1	29	XNoGo	70														1																0
FamCongFirst	1	30	XGo	70				1																241
FamCongFirst	1	31	XGo	70				0																0
FamCongFirst	1	32	XGo	70				1																327
FamCongFirst	1	33	XGo	70				0																0
FamCongFirst	1	34	XGo	70				0																0
FamCongFirst	1	35	XGo	70				0																0
FamCongFirst	1	36	XGo	70				0																0
FamCongFirst	1	37	XNoGo	70														0																317
FamCongFirst	1	38	XGo	70				1																357
FamCongFirst	1	39	XNoGo	70														1																0
FamCongFirst	1	40	XGo	70				1																359
FamCongFirst	1	41	XGo	70				1																316
FamCongFirst	1	42	XGo	70				0																0
FamCongFirst	1	43	XGo	70				1																304
FamCongFirst	1	44	XGo	70				0																0
FamCongFirst	1	45	XGo	70				1																291
FamCongFirst	1	46	XGo	70				1																315
FamCongFirst	1	47	XGo	70				1																354
FamCongFirst	1	48	XNoGo	70														1																0
FamCongFirst	1	49	XGo	70				1																260
FamCongFirst	1	50	XGo	70				1																285
FamCongFirst	1	51	XGo	70				1																253
FamCongFirst	1	52	XGo	70				0																0
FamCongFirst	1	53	XGo	70				1																266
FamCongFirst	1	54	XNoGo	70														1																0
FamCongFirst	1	55	XGo	70				1																343
FamCongFirst	1	56	XGo	70				1																326
FamCongFirst	1	57	XGo	70				1																364
FamCongFirst	1	58	XNoGo	70														1																0
FamCongFirst	1	59	XGo	70				1																309
FamCongFirst	1	60	XGo	70				1																389
FamCongFirst	1	61	XGo	70				1																296
FamCongFirst	1	62	XGo	70				1																304
FamCongFirst	1	63	XGo	70				1																256
FamCongFirst	1	64	XNoGo	70														0																297
FamCongFirst	1	65	XGo	70				0																0
FamCongFirst	1	66	XGo	70				1																309
FamCongFirst	1	67	XGo	70				1																293
FamCongFirst	1	68	XGo	70				1																293
FamCongFirst	1	69	XGo	70				1																308
FamCongFirst	1	70	XGo	70				1																268
FamCongFirst	1	71	XNoGo	70														0																260
FamCongFirst	1	72	XGo	70				1																326
FamCongFirst	1	73	XGo	70				0																0
FamCongFirst	1	74	XNoGo	70														1																0
FamCongFirst	1	75	XGo	70				1																300
FamCongFirst	1	76	XGo	70				1																309
FamCongFirst	1	77	XGo	70				1																357
FamCongFirst	1	78	XGo	70				0																0
FamCongFirst	1	79	XGo	70				1																270
FamCongFirst	1	80	XGo	70				1																319
FamCongFirst	1	81	XNoGo	70														0																374
FamCongFirst	1	82	XNoGo	70														1																0
FamCongFirst	1	83	XGo	70				0																0
FamCongFirst	1	84	XGo	70				1																347
FamCongFirst	1	85	XGo	70				1																337
FamCongFirst	1	86	XGo	70				1																360
FamCongFirst	1	87	XGo	70				1																293
FamCongFirst	1	88	XGo	70				1																261
FamCongFirst	1	89	XGo	70				1																334
FamCongFirst	1	90	XGo	70				1																357
FamCongFirst	1	91	XNoGo	70														1																0
FamCongFirst	1	92	XGo	70				1																318
FamCongFirst	1	93	XGo	70				1																397
FamCongFirst	1	94	XGo	70				1																344
FamCongFirst	1	95	XGo	70				0																0
FamCongFirst	1	96	XGo	70				1																338
FamCongFirst	1	97	XGo	70				1																376
FamCongFirst	1	98	XGo	70				1																325
FamCongFirst	1	99	XGo	70				1																316
FamCongFirst	1	100	XNoGo	70														1																0
FamCongFirst	1	101	XGo	70				1																375
FamCongFirst	1	102	XGo	70				1																276
FamCongFirst	1	103	XNoGo	70														1																0
FamCongFirst	1	104	XGo	70				0																0
FamCongFirst	1	105	XGo	70				1																348
FamCongFirst	1	106	XGo	70				0																0
FamCongFirst	1	107	XGo	70				1																301
FamCongFirst	1	108	XGo	70				1																341
FamCongFirst	1	109	XGo	70				1																324
FamCongFirst	1	110	XGo	70				1																362
FamCongFirst	1	111	XGo	70				1																390
FamCongFirst	1	112	XNoGo	70														0																394
FamCongFirst	1	113	XGo	70				1																366
FamCongFirst	1	114	XGo	70				1																380
FamCongFirst	1	115	XGo	70				1																256
FamCongFirst	1	116	XGo	70				1																378
FamCongFirst	1	117	XGo	70				0																0
FamCongFirst	1	118	XGo	70				0																0
FamCongFirst	1	119	XNoGo	70														1																0
FamCongFirst	1	120	XGo	70				1																306
FamCongFirst	1	121	XGo	70				1																354
FamCongFirst	1	1	ReverseGo		25					0																0
FamCongFirst	1	2	ReverseGo		25					0																0
FamCongFirst	1	3	ReverseNoGo		25											1																0
FamCongFirst	1	4	ReverseGo		25					1																355
FamCongFirst	1	5	ReverseGo		25					0																0
FamCongFirst	1	6	ReverseGo		25					0																0
FamCongFirst	1	7	ReverseGo		25					1																343
FamCongFirst	1	8	ReverseGo		25					0																0
FamCongFirst	1	9	ReverseNoGo		25											0																233
FamCongFirst	1	10	ReverseNoGo		25											1																0
FamCongFirst	1	11	ReverseGo		25					1																240
FamCongFirst	1	12	ReverseGo		25					1																267
FamCongFirst	1	13	ReverseGo		25					1																260
FamCongFirst	1	14	ReverseGo		25					1																260
FamCongFirst	1	15	ReverseGo		25					1																238
FamCongFirst	1	16	ReverseGo		25					1																288
FamCongFirst	1	17	ReverseGo		25					1																249
FamCongFirst	1	18	ReverseGo		25					1																259
FamCongFirst	1	19	ReverseGo		25					0																0
FamCongFirst	1	20	ReverseNoGo		25											0																329
FamCongFirst	1	21	ReverseGo		25					1																344
FamCongFirst	1	22	ReverseGo		25					1																349
FamCongFirst	1	23	ReverseGo		25					1																315
FamCongFirst	1	24	ReverseNoGo		25											1																0
FamCongFirst	1	25	ReverseGo		25					0																0
FamCongFirst	1	26	ReverseGo		25					1																266
FamCongFirst	1	27	ReverseGo		25					1																299
FamCongFirst	1	28	ReverseGo		25					1																371
FamCongFirst	1	29	ReverseNoGo		25											1																0
FamCongFirst	1	30	ReverseGo		25					1																284
FamCongFirst	1	31	ReverseGo		25					1																300
FamCongFirst	1	32	ReverseNoGo		25											0																308
FamCongFirst	1	33	ReverseGo		25					0																0
FamCongFirst	1	34	ReverseGo		25					1																272
FamCongFirst	1	35	ReverseGo		25					1																337
FamCongFirst	1	36	ReverseGo		25					1																247
FamCongFirst	1	37	ReverseGo		25					0																0
FamCongFirst	1	38	ReverseGo		25					1																277
FamCongFirst	1	39	ReverseGo		25					1																285
FamCongFirst	1	40	ReverseGo		25					1																238
FamCongFirst	1	41	ReverseGo		25					1																288
FamCongFirst	1	42	ReverseGo		25					1																201
FamCongFirst	1	43	ReverseGo		25					1																285
FamCongFirst	1	44	ReverseNoGo		25											0																245
FamCongFirst	1	45	ReverseGo		25					0																0
FamCongFirst	1	46	ReverseGo		25					1																268
FamCongFirst	1	47	ReverseGo		25					1																277
FamCongFirst	1	48	ReverseGo		25					1																237
FamCongFirst	1	49	ReverseGo		25					1																255
FamCongFirst	1	50	ReverseGo		25					0																0
FamCongFirst	1	51	ReverseNoGo		25											0																317
FamCongFirst	1	52	ReverseGo		25					1																332
FamCongFirst	1	53	ReverseGo		25					1																284
FamCongFirst	1	54	ReverseGo		25					1																244
FamCongFirst	1	55	ReverseNoGo		25											0																238
FamCongFirst	1	56	ReverseGo		25					1																327
FamCongFirst	1	57	ReverseNoGo		25											0																350
FamCongFirst	1	58	ReverseGo		25					0																0
FamCongFirst	1	59	ReverseGo		25					0																0
FamCongFirst	1	60	ReverseGo		25					1																253
FamCongFirst	1	61	ReverseGo		25					1																255
FamCongFirst	1	62	ReverseGo		25					1																321
FamCongFirst	1	63	ReverseGo		25					1																247
FamCongFirst	1	64	ReverseGo		25					1																265
FamCongFirst	1	65	ReverseNoGo		25											1																0
FamCongFirst	1	66	ReverseGo		25					1																375
FamCongFirst	1	67	ReverseGo		25					0																0
FamCongFirst	1	68	ReverseGo		25					1																287
FamCongFirst	1	69	ReverseGo		25					1																368
FamCongFirst	1	70	ReverseGo		25					1																357
FamCongFirst	1	71	ReverseGo		25					1																298
FamCongFirst	1	72	ReverseNoGo		25											0																329
FamCongFirst	1	73	ReverseGo		25					1																280
FamCongFirst	1	74	ReverseGo		25					1																281
FamCongFirst	1	75	ReverseGo		25					1																330
FamCongFirst	1	76	ReverseGo		25					1																297
FamCongFirst	1	77	ReverseGo		25					1																353
FamCongFirst	1	78	ReverseGo		25					0																0
FamCongFirst	1	79	ReverseGo		25					1																283
FamCongFirst	1	80	ReverseNoGo		25											0																300
FamCongFirst	1	81	ReverseNoGo		25											0																322
FamCongFirst	1	82	ReverseGo		25					0																0
FamCongFirst	1	83	ReverseGo		25					1																238
FamCongFirst	1	84	ReverseGo		25					1																295
FamCongFirst	1	85	ReverseGo		25					1																312
FamCongFirst	1	86	ReverseGo		25					1																256
FamCongFirst	1	87	ReverseGo		25					1																265
FamCongFirst	1	88	ReverseNoGo		25											0																250
FamCongFirst	1	89	ReverseGo		25					1																347
FamCongFirst	1	90	ReverseGo		25					1																353
FamCongFirst	1	91	ReverseGo		25					1																351
FamCongFirst	1	92	ReverseGo		25					0																0
FamCongFirst	1	93	ReverseGo		25					1																346
FamCongFirst	1	94	ReverseGo		25					1																279
FamCongFirst	1	95	ReverseGo		25					1																264
FamCongFirst	1	96	ReverseGo		25					1																306
FamCongFirst	1	97	ReverseGo		25					1																288
FamCongFirst	1	98	ReverseNoGo		25											0																328
FamCongFirst	1	99	ReverseGo		25					0																0
FamCongFirst	1	100	ReverseGo		25					1																290
FamCongFirst	1	101	ReverseGo		25					0																0
FamCongFirst	1	102	ReverseGo		25					1																302
FamCongFirst	1	103	ReverseGo		25					0																0
FamCongFirst	1	104	ReverseGo		25					1																298
FamCongFirst	1	105	ReverseGo		25					1																282
FamCongFirst	1	106	ReverseGo		25					1																353
FamCongFirst	1	107	ReverseNoGo		25											0																271
FamCongFirst	1	108	ReverseGo		25					1																360
FamCongFirst	1	109	ReverseGo		25					0																0
FamCongFirst	1	110	ReverseGo		25					1																386
FamCongFirst	1	111	ReverseNoGo		25											0																319
FamCongFirst	1	112	ReverseGo		25					1																342
FamCongFirst	1	113	ReverseGo		25					1																316
FamCongFirst	1	114	ReverseGo		25					1																306
FamCongFirst	1	115	ReverseGo		25					0																0
FamCongFirst	1	116	ReverseGo		25					1																286
FamCongFirst	1	117	ReverseGo		25					1																271
FamCongFirst	1	118	ReverseNoGo		25											0																256
FamCongFirst	1	119	ReverseGo		25					0																0
FamCongFirst	1	120	ReverseGo		25					1																278
FamCongFirst	2	2	XGo1	85					1																265
FamCongFirst	2	3	XGo1	85					1																299
FamCongFirst	2	4	XGo1	85					1																260
FamCongFirst	2	5	XGo1	85					1																381
FamCongFirst	2	6	XGo1	85					1																282
FamCongFirst	2	7	XNoGo1	85															1																0
FamCongFirst	2	8	XNoGo1	85															1																0
FamCongFirst	2	9	XGo1	85					1																250
FamCongFirst	2	10	XGo1	85					1																293
FamCongFirst	2	11	XGo1	85					1																316
FamCongFirst	2	12	XGo1	85					1																259
FamCongFirst	2	13	XNoGo1	85															1																0
FamCongFirst	2	14	XGo1	85					1																273
FamCongFirst	2	15	XGo1	85					1																282
FamCongFirst	2	16	XNoGo1	85															1																0
FamCongFirst	2	17	XGo1	85					1																239
FamCongFirst	2	18	XGo1	85					1																307
FamCongFirst	2	19	XGo1	85					1																265
FamCongFirst	2	20	XGo1	85					1																291
FamCongFirst	2	21	XGo1	85					1																243
FamCongFirst	2	22	XGo1	85					1																261
FamCongFirst	2	23	XGo1	85					1																263
FamCongFirst	2	24	XNoGo1	85															1																0
FamCongFirst	2	25	XGo1	85					1																261
FamCongFirst	2	26	XGo1	85					1																270
FamCongFirst	2	27	XNoGo1	85															1																0
FamCongFirst	2	28	XNoGo1	85															1																0
FamCongFirst	2	29	XGo1	85					1																279
FamCongFirst	2	30	XGo1	85					1																288
FamCongFirst	2	31	XGo1	85					1																273
FamCongFirst	2	32	XGo1	85					1																283
FamCongFirst	2	33	XNoGo1	85															1																0
FamCongFirst	2	34	XGo1	85					1																312
FamCongFirst	2	35	XGo1	85					1																255
FamCongFirst	2	36	XGo1	85					1																272
FamCongFirst	2	37	XGo1	85					1																273
FamCongFirst	2	38	XNoGo1	85															0																363
FamCongFirst	2	39	XGo1	85					1																288
FamCongFirst	2	40	XGo1	85					1																289
FamCongFirst	2	41	XGo1	85					1																266
FamCongFirst	2	42	XNoGo1	85															0																332
FamCongFirst	2	43	XGo1	85					0																0
FamCongFirst	2	44	XGo1	85					1																285
FamCongFirst	2	45	XGo1	85					1																270
FamCongFirst	2	46	XGo1	85					1																288
FamCongFirst	2	47	XGo1	85					1																272
FamCongFirst	2	48	XGo1	85					1																298
FamCongFirst	2	49	XGo1	85					1																258
FamCongFirst	2	50	XNoGo1	85															1																0
FamCongFirst	2	51	XGo1	85					1																240
FamCongFirst	2	52	XGo1	85					1																259
FamCongFirst	2	53	XGo1	85					1																299
FamCongFirst	2	54	XGo1	85					1																267
FamCongFirst	2	55	XGo1	85					1																237
FamCongFirst	2	56	XGo1	85					1																256
FamCongFirst	2	57	XGo1	85					1																298
FamCongFirst	2	58	XGo1	85					1																315
FamCongFirst	2	59	XGo1	85					1																298
FamCongFirst	2	60	XGo1	85					1																290
FamCongFirst	2	61	XGo1	85					1																290
FamCongFirst	2	62	XGo1	85					1																307
FamCongFirst	2	63	XGo1	85					1																260
FamCongFirst	2	64	XGo1	85					1																293
FamCongFirst	2	65	XNoGo1	85															1																0
FamCongFirst	2	66	XGo1	85					1																265
FamCongFirst	2	67	XGo1	85					1																323
FamCongFirst	2	68	XNoGo1	85															1																0
FamCongFirst	2	69	XGo1	85					1																293
FamCongFirst	2	70	XGo1	85					1																237
FamCongFirst	2	71	XGo1	85					1																336
FamCongFirst	2	72	XGo1	85					1																311
FamCongFirst	2	73	XGo1	85					1																254
FamCongFirst	2	74	XGo1	85					1																264
FamCongFirst	2	75	XGo1	85					1																241
FamCongFirst	2	76	XGo1	85					1																309
FamCongFirst	2	77	XGo1	85					1																252
FamCongFirst	2	78	XNoGo1	85															0																325
FamCongFirst	2	79	XGo1	85					1																292
FamCongFirst	2	80	XGo1	85					1																268
FamCongFirst	2	81	XGo1	85					1																286
FamCongFirst	2	82	XGo1	85					1																319
FamCongFirst	2	83	XGo1	85					1																391
FamCongFirst	2	84	XGo1	85					1																323
FamCongFirst	2	85	XGo1	85					1																283
FamCongFirst	2	86	XGo1	85					1																386
FamCongFirst	2	87	XGo1	85					1																279
FamCongFirst	2	88	XNoGo1	85															1																0
FamCongFirst	2	89	XGo1	85					1																260
FamCongFirst	2	90	XGo1	85					1																334
FamCongFirst	2	91	XGo1	85					1																261
FamCongFirst	2	92	XGo1	85					1																279
FamCongFirst	2	93	XNoGo1	85															1																0
FamCongFirst	2	94	XGo1	85					1																259
FamCongFirst	2	95	XGo1	85					0																0
FamCongFirst	2	96	XGo1	85					1																287
FamCongFirst	2	97	XNoGo1	85															1																0
FamCongFirst	2	98	XGo1	85					1																333
FamCongFirst	2	99	XGo1	85					1																371
FamCongFirst	2	100	XGo1	85					1																345
FamCongFirst	2	101	XGo1	85					1																351
FamCongFirst	2	102	XGo1	85					0																0
FamCongFirst	2	103	XGo1	85					1																312
FamCongFirst	2	104	XGo1	85					1																256
FamCongFirst	2	105	XGo1	85					1																314
FamCongFirst	2	106	XGo1	85					1																305
FamCongFirst	2	107	XNoGo1	85															1																0
FamCongFirst	2	108	XGo1	85					1																269
FamCongFirst	2	109	XGo1	85					1																303
FamCongFirst	2	110	XGo1	85					1																287
FamCongFirst	2	111	XGo1	85					1																319
FamCongFirst	2	112	XGo1	85					1																351
FamCongFirst	2	113	XNoGo1	85															1																0
FamCongFirst	2	114	XGo1	85					1																257
FamCongFirst	2	115	XGo1	85					1																323
FamCongFirst	2	116	XNoGo1	85															1																0
FamCongFirst	2	117	XGo1	85					1																279
FamCongFirst	2	118	XGo1	85					1																320
FamCongFirst	2	119	XGo1	85					1																288
FamCongFirst	2	120	XGo1	85					1																279
FamCongFirst	2	121	XGo1	85					1																328
FamCongFirst	2	1	ReverseGo1		75						1																291
FamCongFirst	2	2	ReverseGo1		75						1																236
FamCongFirst	2	3	ReverseGo1		75						1																272
FamCongFirst	2	4	ReverseGo1		75						1																272
FamCongFirst	2	5	ReverseGo1		75						1																265
FamCongFirst	2	6	ReverseGo1		75						1																243
FamCongFirst	2	7	ReverseGo1		75						1																277
FamCongFirst	2	8	ReverseNoGo1		75												1																0
FamCongFirst	2	9	ReverseGo1		75						1																290
FamCongFirst	2	10	ReverseNoGo1		75												1																0
FamCongFirst	2	11	ReverseGo1		75						1																270
FamCongFirst	2	12	ReverseGo1		75						1																327
FamCongFirst	2	13	ReverseGo1		75						1																302
FamCongFirst	2	14	ReverseGo1		75						1																343
FamCongFirst	2	15	ReverseGo1		75						1																301
FamCongFirst	2	16	ReverseGo1		75						1																285
FamCongFirst	2	17	ReverseNoGo1		75												1																0
FamCongFirst	2	18	ReverseNoGo1		75												1																0
FamCongFirst	2	19	ReverseGo1		75						1																302
FamCongFirst	2	20	ReverseGo1		75						1																318
FamCongFirst	2	21	ReverseGo1		75						1																308
FamCongFirst	2	22	ReverseGo1		75						1																284
FamCongFirst	2	23	ReverseGo1		75						1																293
FamCongFirst	2	24	ReverseNoGo1		75												0																277
FamCongFirst	2	25	ReverseGo1		75						1																326
FamCongFirst	2	26	ReverseGo1		75						1																324
FamCongFirst	2	27	ReverseGo1		75						1																260
FamCongFirst	2	28	ReverseGo1		75						1																310
FamCongFirst	2	29	ReverseNoGo1		75												1																0
FamCongFirst	2	30	ReverseGo1		75						1																256
FamCongFirst	2	31	ReverseGo1		75						1																306
FamCongFirst	2	32	ReverseGo1		75						1																387
FamCongFirst	2	33	ReverseGo1		75						0																0
FamCongFirst	2	34	ReverseGo1		75						1																299
FamCongFirst	2	35	ReverseGo1		75						1																379
FamCongFirst	2	36	ReverseNoGo1		75												1																0
FamCongFirst	2	37	ReverseGo1		75						1																301
FamCongFirst	2	38	ReverseGo1		75						1																259
FamCongFirst	2	39	ReverseGo1		75						1																317
FamCongFirst	2	40	ReverseGo1		75						1																333
FamCongFirst	2	41	ReverseNoGo1		75												0																259
FamCongFirst	2	42	ReverseGo1		75						1																373
FamCongFirst	2	43	ReverseGo1		75						1																362
FamCongFirst	2	44	ReverseGo1		75						1																320
FamCongFirst	2	45	ReverseGo1		75						1																320
FamCongFirst	2	46	ReverseGo1		75						1																358
FamCongFirst	2	47	ReverseGo1		75						1																387
FamCongFirst	2	48	ReverseNoGo1		75												1																0
FamCongFirst	2	49	ReverseGo1		75						1																293
FamCongFirst	2	50	ReverseGo1		75						1																293
FamCongFirst	2	51	ReverseGo1		75						1																253
FamCongFirst	2	52	ReverseGo1		75						0																0
FamCongFirst	2	53	ReverseGo1		75						1																259
FamCongFirst	2	54	ReverseGo1		75						1																292
FamCongFirst	2	55	ReverseGo1		75						1																269
FamCongFirst	2	56	ReverseNoGo1		75												1																0
FamCongFirst	2	57	ReverseGo1		75						1																330
FamCongFirst	2	58	ReverseGo1		75						1																289
FamCongFirst	2	59	ReverseNoGo1		75												0																273
FamCongFirst	2	60	ReverseGo1		75						0																0
FamCongFirst	2	61	ReverseGo1		75						1																255
FamCongFirst	2	62	ReverseGo1		75						1																320
FamCongFirst	2	63	ReverseGo1		75						1																312
FamCongFirst	2	64	ReverseGo1		75						1																296
FamCongFirst	2	65	ReverseGo1		75						1																287
FamCongFirst	2	66	ReverseGo1		75						1																305
FamCongFirst	2	67	ReverseNoGo1		75												1																0
FamCongFirst	2	68	ReverseGo1		75						1																309
FamCongFirst	2	69	ReverseGo1		75						1																348
FamCongFirst	2	70	ReverseGo1		75						1																321
FamCongFirst	2	71	ReverseGo1		75						1																289
FamCongFirst	2	72	ReverseNoGo1		75												1																0
FamCongFirst	2	73	ReverseGo1		75						1																318
FamCongFirst	2	74	ReverseGo1		75						1																301
FamCongFirst	2	75	ReverseGo1		75						1																334
FamCongFirst	2	76	ReverseGo1		75						1																300
FamCongFirst	2	77	ReverseNoGo1		75												1																0
FamCongFirst	2	78	ReverseGo1		75						1																281
FamCongFirst	2	79	ReverseGo1		75						1																265
FamCongFirst	2	80	ReverseGo1		75						1																258
FamCongFirst	2	81	ReverseGo1		75						1																252
FamCongFirst	2	82	ReverseGo1		75						1																287
FamCongFirst	2	83	ReverseGo1		75						1																280
FamCongFirst	2	84	ReverseGo1		75						1																344
FamCongFirst	2	85	ReverseGo1		75						1																311
FamCongFirst	2	86	ReverseGo1		75						1																294
FamCongFirst	2	87	ReverseNoGo1		75												1																0
FamCongFirst	2	88	ReverseGo1		75						1																265
FamCongFirst	2	89	ReverseGo1		75						1																323
FamCongFirst	2	90	ReverseGo1		75						1																274
FamCongFirst	2	91	ReverseGo1		75						1																300
FamCongFirst	2	92	ReverseGo1		75						1																268
FamCongFirst	2	93	ReverseGo1		75						1																302
FamCongFirst	2	94	ReverseNoGo1		75												0																294
FamCongFirst	2	95	ReverseNoGo1		75												0																310
FamCongFirst	2	96	ReverseGo1		75						1																332
FamCongFirst	2	97	ReverseGo1		75						1																347
FamCongFirst	2	98	ReverseGo1		75						1																313
FamCongFirst	2	99	ReverseGo1		75						1																345
FamCongFirst	2	100	ReverseGo1		75						1																367
FamCongFirst	2	101	ReverseGo1		75						1																364
FamCongFirst	2	102	ReverseNoGo1		75												1																0
FamCongFirst	2	103	ReverseGo1		75						1																334
FamCongFirst	2	104	ReverseGo1		75						0																0
FamCongFirst	2	105	ReverseGo1		75						1																304
FamCongFirst	2	106	ReverseGo1		75						1																327
FamCongFirst	2	107	ReverseGo1		75						1																311
FamCongFirst	2	108	ReverseGo1		75						1																302
FamCongFirst	2	109	ReverseNoGo1		75												1																0
FamCongFirst	2	110	ReverseGo1		75						1																347
FamCongFirst	2	111	ReverseGo1		75						1																288
FamCongFirst	2	112	ReverseGo1		75						1																272
FamCongFirst	2	113	ReverseGo1		75						1																290
FamCongFirst	2	114	ReverseGo1		75						1																395
FamCongFirst	2	115	ReverseGo1		75						1																319
FamCongFirst	2	116	ReverseGo1		75						1																342
FamCongFirst	2	117	ReverseGo1		75						1																325
FamCongFirst	2	118	ReverseGo1		75						1																340
FamCongFirst	2	119	ReverseNoGo1		75												1																0
FamCongFirst	2	120	ReverseGo1		75						1																295
FamCongFirst	5	2	XGo	85				1																330
FamCongFirst	5	3	XGo	85				1																305
FamCongFirst	5	4	XGo	85				1																281
FamCongFirst	5	5	XGo	85				1																346
FamCongFirst	5	6	XGo	85				1																320
FamCongFirst	5	7	XGo	85				1																336
FamCongFirst	5	8	XNoGo	85														1																0
FamCongFirst	5	9	XGo	85				1																281
FamCongFirst	5	10	XGo	85				1																363
FamCongFirst	5	11	XNoGo	85														1																0
FamCongFirst	5	12	XGo	85				0																0
FamCongFirst	5	13	XGo	85				1																288
FamCongFirst	5	14	XGo	85				1																296
FamCongFirst	5	15	XGo	85				1																305
FamCongFirst	5	16	XGo	85				1																289
FamCongFirst	5	17	XNoGo	85														1																0
FamCongFirst	5	18	XGo	85				1																357
FamCongFirst	5	19	XGo	85				1																394
FamCongFirst	5	20	XNoGo	85														1																0
FamCongFirst	5	21	XGo	85				1																305
FamCongFirst	5	22	XGo	85				1																362
FamCongFirst	5	23	XGo	85				1																288
FamCongFirst	5	24	XGo	85				1																320
FamCongFirst	5	25	XGo	85				1																286
FamCongFirst	5	26	XGo	85				1																271
FamCongFirst	5	27	XGo	85				1																336
FamCongFirst	5	28	XGo	85				1																303
FamCongFirst	5	29	XNoGo	85														1																0
FamCongFirst	5	30	XGo	85				1																307
FamCongFirst	5	31	XGo	85				1																282
FamCongFirst	5	32	XGo	85				1																307
FamCongFirst	5	33	XGo	85				1																345
FamCongFirst	5	34	XGo	85				1																303
FamCongFirst	5	35	XGo	85				1																279
FamCongFirst	5	36	XGo	85				1																304
FamCongFirst	5	37	XNoGo	85														0																241
FamCongFirst	5	38	XGo	85				1																371
FamCongFirst	5	39	XNoGo	85														1																0
FamCongFirst	5	40	XGo	85				1																261
FamCongFirst	5	41	XGo	85				1																293
FamCongFirst	5	42	XGo	85				1																309
FamCongFirst	5	43	XGo	85				1																333
FamCongFirst	5	44	XGo	85				1																244
FamCongFirst	5	45	XGo	85				1																254
FamCongFirst	5	46	XGo	85				1																248
FamCongFirst	5	47	XGo	85				1																283
FamCongFirst	5	48	XNoGo	85														1																0
FamCongFirst	5	49	XGo	85				1																286
FamCongFirst	5	50	XGo	85				1																303
FamCongFirst	5	51	XGo	85				1																288
FamCongFirst	5	52	XGo	85				1																296
FamCongFirst	5	53	XGo	85				1																360
FamCongFirst	5	54	XNoGo	85														1																0
FamCongFirst	5	55	XGo	85				1																290
FamCongFirst	5	56	XGo	85				1																307
FamCongFirst	5	57	XGo	85				1																347
FamCongFirst	5	58	XNoGo	85														0																328
FamCongFirst	5	59	XGo	85				1																335
FamCongFirst	5	60	XGo	85				1																261
FamCongFirst	5	61	XGo	85				1																327
FamCongFirst	5	62	XGo	85				1																269
FamCongFirst	5	63	XGo	85				1																319
FamCongFirst	5	64	XNoGo	85														1																0
FamCongFirst	5	65	XGo	85				1																291
FamCongFirst	5	66	XGo	85				1																330
FamCongFirst	5	67	XGo	85				0																0
FamCongFirst	5	68	XGo	85				1																301
FamCongFirst	5	69	XGo	85				1																269
FamCongFirst	5	70	XGo	85				1																263
FamCongFirst	5	71	XNoGo	85														1																0
FamCongFirst	5	72	XGo	85				1																317
FamCongFirst	5	73	XGo	85				1																276
FamCongFirst	5	74	XNoGo	85														1																0
FamCongFirst	5	75	XGo	85				1																280
FamCongFirst	5	76	XGo	85				1																281
FamCongFirst	5	77	XGo	85				1																386
FamCongFirst	5	78	XGo	85				1																367
FamCongFirst	5	79	XGo	85				1																308
FamCongFirst	5	80	XGo	85				1																308
FamCongFirst	5	81	XNoGo	85														1																0
FamCongFirst	5	82	XNoGo	85														1																0
FamCongFirst	5	83	XGo	85				1																306
FamCongFirst	5	84	XGo	85				1																331
FamCongFirst	5	85	XGo	85				1																282
FamCongFirst	5	86	XGo	85				1																290
FamCongFirst	5	87	XGo	85				1																355
FamCongFirst	5	88	XGo	85				1																289
FamCongFirst	5	89	XGo	85				1																306
FamCongFirst	5	90	XGo	85				1																290
FamCongFirst	5	91	XNoGo	85														1																0
FamCongFirst	5	92	XGo	85				1																311
FamCongFirst	5	93	XGo	85				1																310
FamCongFirst	5	94	XGo	85				1																310
FamCongFirst	5	95	XGo	85				1																318
FamCongFirst	5	96	XGo	85				1																309
FamCongFirst	5	97	XGo	85				1																356
FamCongFirst	5	98	XGo	85				1																266
FamCongFirst	5	99	XGo	85				1																267
FamCongFirst	5	100	XNoGo	85														0																341
FamCongFirst	5	101	XGo	85				1																315
FamCongFirst	5	102	XGo	85				1																322
FamCongFirst	5	103	XNoGo	85														1																0
FamCongFirst	5	104	XGo	85				1																318
FamCongFirst	5	105	XGo	85				1																278
FamCongFirst	5	106	XGo	85				1																287
FamCongFirst	5	107	XGo	85				1																279
FamCongFirst	5	108	XGo	85				1																304
FamCongFirst	5	109	XGo	85				1																279
FamCongFirst	5	110	XGo	85				0																0
FamCongFirst	5	111	XGo	85				1																284
FamCongFirst	5	112	XNoGo	85														1																0
FamCongFirst	5	113	XGo	85				1																281
FamCongFirst	5	114	XGo	85				1																290
FamCongFirst	5	115	XGo	85				1																275
FamCongFirst	5	116	XGo	85				1																300
FamCongFirst	5	117	XGo	85				1																252
FamCongFirst	5	118	XGo	85				1																293
FamCongFirst	5	119	XNoGo	85														1																0
FamCongFirst	5	120	XGo	85				1																298
FamCongFirst	5	121	XGo	85				1																298
FamCongFirst	5	1	ReverseGo		75					1																326
FamCongFirst	5	2	ReverseGo		75					1																317
FamCongFirst	5	3	ReverseNoGo		75											0																333
FamCongFirst	5	4	ReverseGo		75					1																371
FamCongFirst	5	5	ReverseGo		75					1																297
FamCongFirst	5	6	ReverseGo		75					1																297
FamCongFirst	5	7	ReverseGo		75					1																369
FamCongFirst	5	8	ReverseGo		75					1																286
FamCongFirst	5	9	ReverseNoGo		75											0																351
FamCongFirst	5	10	ReverseNoGo		75											1																0
FamCongFirst	5	11	ReverseGo		75					1																296
FamCongFirst	5	12	ReverseGo		75					1																288
FamCongFirst	5	13	ReverseGo		75					1																305
FamCongFirst	5	14	ReverseGo		75					0																0
FamCongFirst	5	15	ReverseGo		75					1																382
FamCongFirst	5	16	ReverseGo		75					1																330
FamCongFirst	5	17	ReverseGo		75					1																362
FamCongFirst	5	18	ReverseGo		75					1																262
FamCongFirst	5	19	ReverseGo		75					1																287
FamCongFirst	5	20	ReverseNoGo		75											1																0
FamCongFirst	5	21	ReverseGo		75					1																236
FamCongFirst	5	22	ReverseGo		75					1																302
FamCongFirst	5	23	ReverseGo		75					1																279
FamCongFirst	5	24	ReverseNoGo		75											1																0
FamCongFirst	5	25	ReverseGo		75					1																260
FamCongFirst	5	26	ReverseGo		75					1																292
FamCongFirst	5	27	ReverseGo		75					1																397
FamCongFirst	5	28	ReverseGo		75					1																257
FamCongFirst	5	29	ReverseNoGo		75											1																0
FamCongFirst	5	30	ReverseGo		75					1																288
FamCongFirst	5	31	ReverseGo		75					1																257
FamCongFirst	5	32	ReverseNoGo		75											1																0
FamCongFirst	5	33	ReverseGo		75					1																286
FamCongFirst	5	34	ReverseGo		75					1																302
FamCongFirst	5	35	ReverseGo		75					1																278
FamCongFirst	5	36	ReverseGo		75					1																303
FamCongFirst	5	37	ReverseGo		75					1																255
FamCongFirst	5	38	ReverseGo		75					1																314
FamCongFirst	5	39	ReverseGo		75					1																297
FamCongFirst	5	40	ReverseGo		75					1																369
FamCongFirst	5	41	ReverseGo		75					1																335
FamCongFirst	5	42	ReverseGo		75					1																342
FamCongFirst	5	43	ReverseGo		75					1																315
FamCongFirst	5	44	ReverseNoGo		75											1																0
FamCongFirst	5	45	ReverseGo		75					0																0
FamCongFirst	5	46	ReverseGo		75					1																251
FamCongFirst	5	47	ReverseGo		75					1																285
FamCongFirst	5	48	ReverseGo		75					1																310
FamCongFirst	5	49	ReverseGo		75					1																270
FamCongFirst	5	50	ReverseGo		75					1																255
FamCongFirst	5	51	ReverseNoGo		75											1																0
FamCongFirst	5	52	ReverseGo		75					1																309
FamCongFirst	5	53	ReverseGo		75					1																348
FamCongFirst	5	54	ReverseGo		75					1																274
FamCongFirst	5	55	ReverseNoGo		75											1																0
FamCongFirst	5	56	ReverseGo		75					1																320
FamCongFirst	5	57	ReverseNoGo		75											0																335
FamCongFirst	5	58	ReverseGo		75					1																302
FamCongFirst	5	59	ReverseGo		75					1																269
FamCongFirst	5	60	ReverseGo		75					1																271
FamCongFirst	5	61	ReverseGo		75					1																280
FamCongFirst	5	62	ReverseGo		75					1																305
FamCongFirst	5	63	ReverseGo		75					1																282
FamCongFirst	5	64	ReverseGo		75					1																338
FamCongFirst	5	65	ReverseNoGo		75											1																0
FamCongFirst	5	66	ReverseGo		75					1																333
FamCongFirst	5	67	ReverseGo		75					1																324
FamCongFirst	5	68	ReverseGo		75					1																290
FamCongFirst	5	69	ReverseGo		75					1																331
FamCongFirst	5	70	ReverseGo		75					1																306
FamCongFirst	5	71	ReverseGo		75					1																297
FamCongFirst	5	72	ReverseNoGo		75											0																258
FamCongFirst	5	73	ReverseGo		75					0																0
FamCongFirst	5	74	ReverseGo		75					1																352
FamCongFirst	5	75	ReverseGo		75					1																294
FamCongFirst	5	76	ReverseGo		75					0																0
FamCongFirst	5	77	ReverseGo		75					1																281
FamCongFirst	5	78	ReverseGo		75					1																322
FamCongFirst	5	79	ReverseGo		75					1																290
FamCongFirst	5	80	ReverseNoGo		75											0																267
FamCongFirst	5	81	ReverseNoGo		75											1																0
FamCongFirst	5	82	ReverseGo		75					1																288
FamCongFirst	5	83	ReverseGo		75					1																289
FamCongFirst	5	84	ReverseGo		75					1																378
FamCongFirst	5	85	ReverseGo		75					1																310
FamCongFirst	5	86	ReverseGo		75					1																269
FamCongFirst	5	87	ReverseGo		75					1																343
FamCongFirst	5	88	ReverseNoGo		75											1																0
FamCongFirst	5	89	ReverseGo		75					1																257
FamCongFirst	5	90	ReverseGo		75					1																283
FamCongFirst	5	91	ReverseGo		75					1																300
FamCongFirst	5	92	ReverseGo		75					1																364
FamCongFirst	5	93	ReverseGo		75					1																368
FamCongFirst	5	94	ReverseGo		75					1																302
FamCongFirst	5	95	ReverseGo		75					1																270
FamCongFirst	5	96	ReverseGo		75					1																304
FamCongFirst	5	97	ReverseGo		75					1																336
FamCongFirst	5	98	ReverseNoGo		75											1																0
FamCongFirst	5	99	ReverseGo		75					1																244
FamCongFirst	5	100	ReverseGo		75					1																253
FamCongFirst	5	101	ReverseGo		75					1																278
FamCongFirst	5	102	ReverseGo		75					1																287
FamCongFirst	5	103	ReverseGo		75					1																264
FamCongFirst	5	104	ReverseGo		75					1																290
FamCongFirst	5	105	ReverseGo		75					1																299
FamCongFirst	5	106	ReverseGo		75					1																259
FamCongFirst	5	107	ReverseNoGo		75											1																0
FamCongFirst	5	108	ReverseGo		75					1																328
FamCongFirst	5	109	ReverseGo		75					0																0
FamCongFirst	5	110	ReverseGo		75					1																275
FamCongFirst	5	111	ReverseNoGo		75											1																0
FamCongFirst	5	112	ReverseGo		75					1																351
FamCongFirst	5	113	ReverseGo		75					1																333
FamCongFirst	5	114	ReverseGo		75					1																300
FamCongFirst	5	115	ReverseGo		75					1																317
FamCongFirst	5	116	ReverseGo		75					1																308
FamCongFirst	5	117	ReverseGo		75					1																364
FamCongFirst	5	118	ReverseNoGo		75											1																0
FamCongFirst	5	119	ReverseGo		75					1																284
FamCongFirst	5	120	ReverseGo		75					1																325
FamCongFirst	6	2	XGo1	65					1																298
FamCongFirst	6	3	XGo1	65					1																338
FamCongFirst	6	4	XGo1	65					1																313
FamCongFirst	6	5	XGo1	65					1																367
FamCongFirst	6	6	XGo1	65					1																301
FamCongFirst	6	7	XNoGo1	65															1																0
FamCongFirst	6	8	XNoGo1	65															1																0
FamCongFirst	6	9	XGo1	65					0																0
FamCongFirst	6	10	XGo1	65					1																313
FamCongFirst	6	11	XGo1	65					1																304
FamCongFirst	6	12	XGo1	65					1																329
FamCongFirst	6	13	XNoGo1	65															0																303
FamCongFirst	6	14	XGo1	65					1																335
FamCongFirst	6	15	XGo1	65					1																350
FamCongFirst	6	16	XNoGo1	65															1																0
FamCongFirst	6	17	XGo1	65					1																336
FamCongFirst	6	18	XGo1	65					1																375
FamCongFirst	6	19	XGo1	65					1																324
FamCongFirst	6	20	XGo1	65					1																308
FamCongFirst	6	21	XGo1	65					1																339
FamCongFirst	6	22	XGo1	65					1																322
FamCongFirst	6	23	XGo1	65					1																337
FamCongFirst	6	24	XNoGo1	65															0																328
FamCongFirst	6	25	XGo1	65					0																0
FamCongFirst	6	26	XGo1	65					1																370
FamCongFirst	6	27	XNoGo1	65															0																376
FamCongFirst	6	28	XNoGo1	65															1																0
FamCongFirst	6	29	XGo1	65					1																297
FamCongFirst	6	30	XGo1	65					1																345
FamCongFirst	6	31	XGo1	65					1																399
FamCongFirst	6	32	XGo1	65					1																315
FamCongFirst	6	33	XNoGo1	65															1																0
FamCongFirst	6	34	XGo1	65					1																366
FamCongFirst	6	35	XGo1	65					1																356
FamCongFirst	6	36	XGo1	65					1																338
FamCongFirst	6	37	XGo1	65					1																329
FamCongFirst	6	38	XNoGo1	65															1																0
FamCongFirst	6	39	XGo1	65					1																363
FamCongFirst	6	40	XGo1	65					1																360
FamCongFirst	6	41	XGo1	65					1																365
FamCongFirst	6	42	XNoGo1	65															1																0
FamCongFirst	6	43	XGo1	65					0																0
FamCongFirst	6	44	XGo1	65					1																363
FamCongFirst	6	45	XGo1	65					0																0
FamCongFirst	6	46	XGo1	65					1																291
FamCongFirst	6	47	XGo1	65					1																397
FamCongFirst	6	48	XGo1	65					1																313
FamCongFirst	6	49	XGo1	65					1																288
FamCongFirst	6	50	XNoGo1	65															1																0
FamCongFirst	6	51	XGo1	65					1																309
FamCongFirst	6	52	XGo1	65					1																292
FamCongFirst	6	53	XGo1	65					1																365
FamCongFirst	6	54	XGo1	65					1																297
FamCongFirst	6	55	XGo1	65					1																337
FamCongFirst	6	56	XGo1	65					1																368
FamCongFirst	6	57	XGo1	65					1																318
FamCongFirst	6	58	XGo1	65					1																397
FamCongFirst	6	59	XGo1	65					1																345
FamCongFirst	6	60	XGo1	65					1																319
FamCongFirst	6	61	XGo1	65					1																359
FamCongFirst	6	62	XGo1	65					1																307
FamCongFirst	6	63	XGo1	65					1																300
FamCongFirst	6	64	XGo1	65					1																299
FamCongFirst	6	65	XNoGo1	65															1																0
FamCongFirst	6	66	XGo1	65					1																304
FamCongFirst	6	67	XGo1	65					1																320
FamCongFirst	6	68	XNoGo1	65															0																319
FamCongFirst	6	69	XGo1	65					1																391
FamCongFirst	6	70	XGo1	65					1																356
FamCongFirst	6	71	XGo1	65					0																0
FamCongFirst	6	72	XGo1	65					0																0
FamCongFirst	6	73	XGo1	65					1																273
FamCongFirst	6	74	XGo1	65					1																251
FamCongFirst	6	75	XGo1	65					1																269
FamCongFirst	6	76	XGo1	65					1																271
FamCongFirst	6	77	XGo1	65					1																288
FamCongFirst	6	78	XNoGo1	65															0																289
FamCongFirst	6	79	XGo1	65					1																264
FamCongFirst	6	80	XGo1	65					1																322
FamCongFirst	6	81	XGo1	65					1																306
FamCongFirst	6	82	XGo1	65					1																330
FamCongFirst	6	83	XGo1	65					1																265
FamCongFirst	6	84	XGo1	65					1																259
FamCongFirst	6	85	XGo1	65					1																292
FamCongFirst	6	86	XGo1	65					1																308
FamCongFirst	6	87	XGo1	65					1																307
FamCongFirst	6	88	XNoGo1	65															1																0
FamCongFirst	6	89	XGo1	65					1																319
FamCongFirst	6	90	XGo1	65					1																295
FamCongFirst	6	91	XGo1	65					1																351
FamCongFirst	6	92	XGo1	65					1																309
FamCongFirst	6	93	XNoGo1	65															1																0
FamCongFirst	6	94	XGo1	65					1																392
FamCongFirst	6	95	XGo1	65					1																350
FamCongFirst	6	96	XGo1	65					1																347
FamCongFirst	6	97	XNoGo1	65															1																0
FamCongFirst	6	98	XGo1	65					0																0
FamCongFirst	6	99	XGo1	65					1																265
FamCongFirst	6	100	XGo1	65					1																291
FamCongFirst	6	101	XGo1	65					1																300
FamCongFirst	6	102	XGo1	65					1																371
FamCongFirst	6	103	XGo1	65					1																337
FamCongFirst	6	104	XGo1	65					1																247
FamCongFirst	6	105	XGo1	65					1																313
FamCongFirst	6	106	XGo1	65					1																280
FamCongFirst	6	107	XNoGo1	65															1																0
FamCongFirst	6	108	XGo1	65					1																294
FamCongFirst	6	109	XGo1	65					1																310
FamCongFirst	6	110	XGo1	65					1																285
FamCongFirst	6	111	XGo1	65					1																374
FamCongFirst	6	112	XGo1	65					1																268
FamCongFirst	6	113	XNoGo1	65															0																300
FamCongFirst	6	114	XGo1	65					1																357
FamCongFirst	6	115	XGo1	65					1																299
FamCongFirst	6	116	XNoGo1	65															0																299
FamCongFirst	6	117	XGo1	65					1																307
FamCongFirst	6	118	XGo1	65					1																306
FamCongFirst	6	119	XGo1	65					1																314
FamCongFirst	6	120	XGo1	65					1																322
FamCongFirst	6	121	XGo1	65					1																344
FamCongFirst	6	1	ReverseGo1		50						0																0
FamCongFirst	6	2	ReverseGo1		50						1																299
FamCongFirst	6	3	ReverseGo1		50						1																308
FamCongFirst	6	4	ReverseGo1		50						1																347
FamCongFirst	6	5	ReverseGo1		50						1																305
FamCongFirst	6	6	ReverseGo1		50						1																353
FamCongFirst	6	7	ReverseGo1		50						1																303
FamCongFirst	6	8	ReverseNoGo1		50												0																327
FamCongFirst	6	9	ReverseGo1		50						1																334
FamCongFirst	6	10	ReverseNoGo1		50												1																0
FamCongFirst	6	11	ReverseGo1		50						1																296
FamCongFirst	6	12	ReverseGo1		50						1																320
FamCongFirst	6	13	ReverseGo1		50						1																319
FamCongFirst	6	14	ReverseGo1		50						1																295
FamCongFirst	6	15	ReverseGo1		50						1																320
FamCongFirst	6	16	ReverseGo1		50						1																335
FamCongFirst	6	17	ReverseNoGo1		50												0																342
FamCongFirst	6	18	ReverseNoGo1		50												0																357
FamCongFirst	6	19	ReverseGo1		50						1																387
FamCongFirst	6	20	ReverseGo1		50						1																310
FamCongFirst	6	21	ReverseGo1		50						1																318
FamCongFirst	6	22	ReverseGo1		50						1																302
FamCongFirst	6	23	ReverseGo1		50						1																334
FamCongFirst	6	24	ReverseNoGo1		50												1																0
FamCongFirst	6	25	ReverseGo1		50						0																0
FamCongFirst	6	26	ReverseGo1		50						1																276
FamCongFirst	6	27	ReverseGo1		50						1																269
FamCongFirst	6	28	ReverseGo1		50						1																287
FamCongFirst	6	29	ReverseNoGo1		50												0																270
FamCongFirst	6	30	ReverseGo1		50						1																368
FamCongFirst	6	31	ReverseGo1		50						1																302
FamCongFirst	6	32	ReverseGo1		50						1																286
FamCongFirst	6	33	ReverseGo1		50						1																295
FamCongFirst	6	34	ReverseGo1		50						1																319
FamCongFirst	6	35	ReverseGo1		50						1																335
FamCongFirst	6	36	ReverseNoGo1		50												0																309
FamCongFirst	6	37	ReverseGo1		50						0																0
FamCongFirst	6	38	ReverseGo1		50						1																336
FamCongFirst	6	39	ReverseGo1		50						1																311
FamCongFirst	6	40	ReverseGo1		50						1																318
FamCongFirst	6	41	ReverseNoGo1		50												1																0
FamCongFirst	6	42	ReverseGo1		50						1																346
FamCongFirst	6	43	ReverseGo1		50						1																344
FamCongFirst	6	44	ReverseGo1		50						1																334
FamCongFirst	6	45	ReverseGo1		50						1																348
FamCongFirst	6	46	ReverseGo1		50						1																338
FamCongFirst	6	47	ReverseGo1		50						1																280
FamCongFirst	6	48	ReverseNoGo1		50												1																0
FamCongFirst	6	49	ReverseGo1		50						1																357
FamCongFirst	6	50	ReverseGo1		50						1																259
FamCongFirst	6	51	ReverseGo1		50						1																341
FamCongFirst	6	52	ReverseGo1		50						0																0
FamCongFirst	6	53	ReverseGo1		50						1																265
FamCongFirst	6	54	ReverseGo1		50						1																305
FamCongFirst	6	55	ReverseGo1		50						1																353
FamCongFirst	6	56	ReverseNoGo1		50												0																311
FamCongFirst	6	57	ReverseGo1		50						1																359
FamCongFirst	6	58	ReverseGo1		50						1																389
FamCongFirst	6	59	ReverseNoGo1		50												1																0
FamCongFirst	6	60	ReverseGo1		50						1																333
FamCongFirst	6	61	ReverseGo1		50						1																332
FamCongFirst	6	62	ReverseGo1		50						1																306
FamCongFirst	6	63	ReverseGo1		50						1																305
FamCongFirst	6	64	ReverseGo1		50						1																394
FamCongFirst	6	65	ReverseGo1		50						1																294
FamCongFirst	6	66	ReverseGo1		50						1																351
FamCongFirst	6	67	ReverseNoGo1		50												0																333
FamCongFirst	6	68	ReverseGo1		50						1																363
FamCongFirst	6	69	ReverseGo1		50						1																329
FamCongFirst	6	70	ReverseGo1		50						1																302
FamCongFirst	6	71	ReverseGo1		50						1																391
FamCongFirst	6	72	ReverseNoGo1		50												1																0
FamCongFirst	6	73	ReverseGo1		50						1																319
FamCongFirst	6	74	ReverseGo1		50						1																311
FamCongFirst	6	75	ReverseGo1		50						1																278
FamCongFirst	6	76	ReverseGo1		50						1																343
FamCongFirst	6	77	ReverseNoGo1		50												1																0
FamCongFirst	6	78	ReverseGo1		50						1																344
FamCongFirst	6	79	ReverseGo1		50						1																343
FamCongFirst	6	80	ReverseGo1		50						1																317
FamCongFirst	6	81	ReverseGo1		50						1																316
FamCongFirst	6	82	ReverseGo1		50						1																323
FamCongFirst	6	83	ReverseGo1		50						1																379
FamCongFirst	6	84	ReverseGo1		50						1																288
FamCongFirst	6	85	ReverseGo1		50						1																345
FamCongFirst	6	86	ReverseGo1		50						1																318
FamCongFirst	6	87	ReverseNoGo1		50												1																0
FamCongFirst	6	88	ReverseGo1		50						1																306
FamCongFirst	6	89	ReverseGo1		50						1																314
FamCongFirst	6	90	ReverseGo1		50						1																281
FamCongFirst	6	91	ReverseGo1		50						1																378
FamCongFirst	6	92	ReverseGo1		50						1																279
FamCongFirst	6	93	ReverseGo1		50						1																279
FamCongFirst	6	94	ReverseNoGo1		50												0																296
FamCongFirst	6	95	ReverseNoGo1		50												1																0
FamCongFirst	6	96	ReverseGo1		50						0																0
FamCongFirst	6	97	ReverseGo1		50						1																304
FamCongFirst	6	98	ReverseGo1		50						1																296
FamCongFirst	6	99	ReverseGo1		50						1																313
FamCongFirst	6	100	ReverseGo1		50						1																328
FamCongFirst	6	101	ReverseGo1		50						1																326
FamCongFirst	6	102	ReverseNoGo1		50												0																349
FamCongFirst	6	103	ReverseGo1		50						0																0
FamCongFirst	6	104	ReverseGo1		50						1																367
FamCongFirst	6	105	ReverseGo1		50						1																324
FamCongFirst	6	106	ReverseGo1		50						1																356
FamCongFirst	6	107	ReverseGo1		50						0																0
FamCongFirst	6	108	ReverseGo1		50						1																334
FamCongFirst	6	109	ReverseNoGo1		50												1																0
FamCongFirst	6	110	ReverseGo1		50						0																0
FamCongFirst	6	111	ReverseGo1		50						1																277
FamCongFirst	6	112	ReverseGo1		50						1																309
FamCongFirst	6	113	ReverseGo1		50						1																292
FamCongFirst	6	114	ReverseGo1		50						1																301
FamCongFirst	6	115	ReverseGo1		50						1																309
FamCongFirst	6	116	ReverseGo1		50						1																300
FamCongFirst	6	117	ReverseGo1		50						1																300
FamCongFirst	6	118	ReverseGo1		50						1																389
FamCongFirst	6	119	ReverseNoGo1		50												0																329
FamCongFirst	6	120	ReverseGo1		50						1																343
FamCongFirst	13	2	XGo	75				1																310
FamCongFirst	13	3	XGo	75				1																309
FamCongFirst	13	4	XGo	75				1																285
FamCongFirst	13	5	XGo	75				1																326
FamCongFirst	13	6	XGo	75				1																341
FamCongFirst	13	7	XGo	75				1																298
FamCongFirst	13	8	XNoGo	75														0																323
FamCongFirst	13	9	XGo	75				1																282
FamCongFirst	13	10	XGo	75				1																315
FamCongFirst	13	11	XNoGo	75														0																322
FamCongFirst	13	12	XGo	75				0																0
FamCongFirst	13	13	XGo	75				1																294
FamCongFirst	13	14	XGo	75				1																295
FamCongFirst	13	15	XGo	75				1																311
FamCongFirst	13	16	XGo	75				1																325
FamCongFirst	13	17	XNoGo	75														1																0
FamCongFirst	13	18	XGo	75				1																321
FamCongFirst	13	19	XGo	75				1																376
FamCongFirst	13	20	XNoGo	75														1																0
FamCongFirst	13	21	XGo	75				1																273
FamCongFirst	13	22	XGo	75				0																0
FamCongFirst	13	23	XGo	75				1																334
FamCongFirst	13	24	XGo	75				1																341
FamCongFirst	13	25	XGo	75				1																323
FamCongFirst	13	26	XGo	75				1																307
FamCongFirst	13	27	XGo	75				1																267
FamCongFirst	13	28	XGo	75				1																332
FamCongFirst	13	29	XNoGo	75														1																0
FamCongFirst	13	30	XGo	75				1																327
FamCongFirst	13	31	XGo	75				1																381
FamCongFirst	13	32	XGo	75				1																385
FamCongFirst	13	33	XGo	75				1																294
FamCongFirst	13	34	XGo	75				1																270
FamCongFirst	13	35	XGo	75				1																304
FamCongFirst	13	36	XGo	75				1																360
FamCongFirst	13	37	XNoGo	75														1																0
FamCongFirst	13	38	XGo	75				1																281
FamCongFirst	13	39	XNoGo	75														1																0
FamCongFirst	13	40	XGo	75				1																270
FamCongFirst	13	41	XGo	75				1																287
FamCongFirst	13	42	XGo	75				1																304
FamCongFirst	13	43	XGo	75				1																336
FamCongFirst	13	44	XGo	75				0																0
FamCongFirst	13	45	XGo	75				1																339
FamCongFirst	13	46	XGo	75				1																370
FamCongFirst	13	47	XGo	75				1																368
FamCongFirst	13	48	XNoGo	75														1																0
FamCongFirst	13	49	XGo	75				1																336
FamCongFirst	13	50	XGo	75				1																319
FamCongFirst	13	51	XGo	75				1																303
FamCongFirst	13	52	XGo	75				1																391
FamCongFirst	13	53	XGo	75				1																331
FamCongFirst	13	54	XNoGo	75														0																314
FamCongFirst	13	55	XGo	75				1																314
FamCongFirst	13	56	XGo	75				1																321
FamCongFirst	13	57	XGo	75				1																329
FamCongFirst	13	58	XNoGo	75														1																0
FamCongFirst	13	59	XGo	75				1																346
FamCongFirst	13	60	XGo	75				1																329
FamCongFirst	13	61	XGo	75				1																319
FamCongFirst	13	62	XGo	75				1																351
FamCongFirst	13	63	XGo	75				1																309
FamCongFirst	13	64	XNoGo	75														1																0
FamCongFirst	13	65	XGo	75				1																329
FamCongFirst	13	66	XGo	75				1																319
FamCongFirst	13	67	XGo	75				1																366
FamCongFirst	13	68	XGo	75				1																396
FamCongFirst	13	69	XGo	75				1																312
FamCongFirst	13	70	XGo	75				1																375
FamCongFirst	13	71	XNoGo	75														1																0
FamCongFirst	13	72	XGo	75				1																352
FamCongFirst	13	73	XGo	75				1																375
FamCongFirst	13	74	XNoGo	75														1																0
FamCongFirst	13	75	XGo	75				1																335
FamCongFirst	13	76	XGo	75				0																0
FamCongFirst	13	77	XGo	75				1																290
FamCongFirst	13	78	XGo	75				0																0
FamCongFirst	13	79	XGo	75				0																0
FamCongFirst	13	80	XGo	75				1																260
FamCongFirst	13	81	XNoGo	75														1																0
FamCongFirst	13	82	XNoGo	75														1																0
FamCongFirst	13	83	XGo	75				1																356
FamCongFirst	13	84	XGo	75				1																315
FamCongFirst	13	85	XGo	75				1																242
FamCongFirst	13	86	XGo	75				1																284
FamCongFirst	13	87	XGo	75				1																245
FamCongFirst	13	88	XGo	75				1																239
FamCongFirst	13	89	XGo	75				1																258
FamCongFirst	13	90	XGo	75				1																276
FamCongFirst	13	91	XNoGo	75														0																276
FamCongFirst	13	92	XGo	75				1																341
FamCongFirst	13	93	XGo	75				1																291
FamCongFirst	13	94	XGo	75				1																292
FamCongFirst	13	95	XGo	75				1																380
FamCongFirst	13	96	XGo	75				1																249
FamCongFirst	13	97	XGo	75				1																283
FamCongFirst	13	98	XGo	75				1																348
FamCongFirst	13	99	XGo	75				1																329
FamCongFirst	13	100	XNoGo	75														1																0
FamCongFirst	13	101	XGo	75				1																316
FamCongFirst	13	102	XGo	75				1																251
FamCongFirst	13	103	XNoGo	75														0																310
FamCongFirst	13	104	XGo	75				1																277
FamCongFirst	13	105	XGo	75				1																286
FamCongFirst	13	106	XGo	75				0																0
FamCongFirst	13	107	XGo	75				1																282
FamCongFirst	13	108	XGo	75				1																322
FamCongFirst	13	109	XGo	75				1																290
FamCongFirst	13	110	XGo	75				1																347
FamCongFirst	13	111	XGo	75				1																273
FamCongFirst	13	112	XNoGo	75														1																0
FamCongFirst	13	113	XGo	75				1																263
FamCongFirst	13	114	XGo	75				0																0
FamCongFirst	13	115	XGo	75				1																323
FamCongFirst	13	116	XGo	75				1																314
FamCongFirst	13	117	XGo	75				1																322
FamCongFirst	13	118	XGo	75				1																313
FamCongFirst	13	119	XNoGo	75														1																0
FamCongFirst	13	120	XGo	75				1																293
FamCongFirst	13	121	XGo	75				1																325
FamCongFirst	13	1	ReverseGo		45					1																329
FamCongFirst	13	2	ReverseGo		45					1																280
FamCongFirst	13	3	ReverseNoGo		45											1																0
FamCongFirst	13	4	ReverseGo		45					1																293
FamCongFirst	13	5	ReverseGo		45					1																357
FamCongFirst	13	6	ReverseGo		45					1																259
FamCongFirst	13	7	ReverseGo		45					0																0
FamCongFirst	13	8	ReverseGo		45					1																272
FamCongFirst	13	9	ReverseNoGo		45											0																313
FamCongFirst	13	10	ReverseNoGo		45											1																0
FamCongFirst	13	11	ReverseGo		45					1																365
FamCongFirst	13	12	ReverseGo		45					1																299
FamCongFirst	13	13	ReverseGo		45					1																322
FamCongFirst	13	14	ReverseGo		45					1																322
FamCongFirst	13	15	ReverseGo		45					1																264
FamCongFirst	13	16	ReverseGo		45					0																0
FamCongFirst	13	17	ReverseGo		45					1																278
FamCongFirst	13	18	ReverseGo		45					1																279
FamCongFirst	13	19	ReverseGo		45					1																313
FamCongFirst	13	20	ReverseNoGo		45											1																0
FamCongFirst	13	21	ReverseGo		45					1																340
FamCongFirst	13	22	ReverseGo		45					1																219
FamCongFirst	13	23	ReverseGo		45					1																270
FamCongFirst	13	24	ReverseNoGo		45											1																0
FamCongFirst	13	25	ReverseGo		45					1																283
FamCongFirst	13	26	ReverseGo		45					1																356
FamCongFirst	13	27	ReverseGo		45					1																297
FamCongFirst	13	28	ReverseGo		45					1																338
FamCongFirst	13	29	ReverseNoGo		45											0																369
FamCongFirst	13	30	ReverseGo		45					1																302
FamCongFirst	13	31	ReverseGo		45					0																0
FamCongFirst	13	32	ReverseNoGo		45											1																0
FamCongFirst	13	33	ReverseGo		45					1																269
FamCongFirst	13	34	ReverseGo		45					1																319
FamCongFirst	13	35	ReverseGo		45					1																270
FamCongFirst	13	36	ReverseGo		45					1																280
FamCongFirst	13	37	ReverseGo		45					1																321
FamCongFirst	13	38	ReverseGo		45					1																288
FamCongFirst	13	39	ReverseGo		45					1																321
FamCongFirst	13	40	ReverseGo		45					1																304
FamCongFirst	13	41	ReverseGo		45					1																288
FamCongFirst	13	42	ReverseGo		45					1																248
FamCongFirst	13	43	ReverseGo		45					1																291
FamCongFirst	13	44	ReverseNoGo		45											1																0
FamCongFirst	13	45	ReverseGo		45					1																288
FamCongFirst	13	46	ReverseGo		45					0																0
FamCongFirst	13	47	ReverseGo		45					1																237
FamCongFirst	13	48	ReverseGo		45					1																295
FamCongFirst	13	49	ReverseGo		45					1																391
FamCongFirst	13	50	ReverseGo		45					1																332
FamCongFirst	13	51	ReverseNoGo		45											0																370
FamCongFirst	13	52	ReverseGo		45					0																0
FamCongFirst	13	53	ReverseGo		45					1																300
FamCongFirst	13	54	ReverseGo		45					1																316
FamCongFirst	13	55	ReverseNoGo		45											1																0
FamCongFirst	13	56	ReverseGo		45					1																264
FamCongFirst	13	57	ReverseNoGo		45											1																0
FamCongFirst	13	58	ReverseGo		45					1																309
FamCongFirst	13	59	ReverseGo		45					1																364
FamCongFirst	13	60	ReverseGo		45					1																282
FamCongFirst	13	61	ReverseGo		45					1																330
FamCongFirst	13	62	ReverseGo		45					1																361
FamCongFirst	13	63	ReverseGo		45					1																391
FamCongFirst	13	64	ReverseGo		45					1																315
FamCongFirst	13	65	ReverseNoGo		45											0																273
FamCongFirst	13	66	ReverseGo		45					1																251
FamCongFirst	13	67	ReverseGo		45					1																333
FamCongFirst	13	68	ReverseGo		45					1																348
FamCongFirst	13	69	ReverseGo		45					1																291
FamCongFirst	13	70	ReverseGo		45					1																283
FamCongFirst	13	71	ReverseGo		45					1																277
FamCongFirst	13	72	ReverseNoGo		45											0																325
FamCongFirst	13	73	ReverseGo		45					0																0
FamCongFirst	13	74	ReverseGo		45					1																304
FamCongFirst	13	75	ReverseGo		45					1																312
FamCongFirst	13	76	ReverseGo		45					1																271
FamCongFirst	13	77	ReverseGo		45					1																281
FamCongFirst	13	78	ReverseGo		45					1																314
FamCongFirst	13	79	ReverseGo		45					1																289
FamCongFirst	13	80	ReverseNoGo		45											0																314
FamCongFirst	13	81	ReverseNoGo		45											0																304
FamCongFirst	13	82	ReverseGo		45					1																304
FamCongFirst	13	83	ReverseGo		45					1																337
FamCongFirst	13	84	ReverseGo		45					1																312
FamCongFirst	13	85	ReverseGo		45					1																303
FamCongFirst	13	86	ReverseGo		45					1																391
FamCongFirst	13	87	ReverseGo		45					1																317
FamCongFirst	13	88	ReverseNoGo		45											0																300
FamCongFirst	13	89	ReverseGo		45					1																292
FamCongFirst	13	90	ReverseGo		45					0																0
FamCongFirst	13	91	ReverseGo		45					1																279
FamCongFirst	13	92	ReverseGo		45					1																313
FamCongFirst	13	93	ReverseGo		45					1																248
FamCongFirst	13	94	ReverseGo		45					1																339
FamCongFirst	13	95	ReverseGo		45					1																234
FamCongFirst	13	96	ReverseGo		45					1																364
FamCongFirst	13	97	ReverseGo		45					1																298
FamCongFirst	13	98	ReverseNoGo		45											1																0
FamCongFirst	13	99	ReverseGo		45					1																317
FamCongFirst	13	100	ReverseGo		45					1																324
FamCongFirst	13	101	ReverseGo		45					1																348
FamCongFirst	13	102	ReverseGo		45					1																299
FamCongFirst	13	103	ReverseGo		45					1																275
FamCongFirst	13	104	ReverseGo		45					1																308
FamCongFirst	13	105	ReverseGo		45					0																0
FamCongFirst	13	106	ReverseGo		45					1																289
FamCongFirst	13	107	ReverseNoGo		45											0																328
FamCongFirst	13	108	ReverseGo		45					1																351
FamCongFirst	13	109	ReverseGo		45					0																0
FamCongFirst	13	110	ReverseGo		45					1																321
FamCongFirst	13	111	ReverseNoGo		45											0																329
FamCongFirst	13	112	ReverseGo		45					1																263
FamCongFirst	13	113	ReverseGo		45					0																0
FamCongFirst	13	114	ReverseGo		45					1																317
FamCongFirst	13	115	ReverseGo		45					1																267
FamCongFirst	13	116	ReverseGo		45					1																277
FamCongFirst	13	117	ReverseGo		45					1																310
FamCongFirst	13	118	ReverseNoGo		45											0																317
FamCongFirst	13	119	ReverseGo		45					0																0
FamCongFirst	13	120	ReverseGo		45					1																313
FamIncongFirst	3	2	ReverseGo		45					1																261
FamIncongFirst	3	3	ReverseGo		45					1																245
FamIncongFirst	3	4	ReverseNoGo		45											1																0
FamIncongFirst	3	5	ReverseGo		45					1																259
FamIncongFirst	3	6	ReverseGo		45					1																221
FamIncongFirst	3	7	ReverseGo		45					0																0
FamIncongFirst	3	8	ReverseGo		45					1																308
FamIncongFirst	3	9	ReverseGo		45					1																333
FamIncongFirst	3	10	ReverseNoGo		45											1																0
FamIncongFirst	3	11	ReverseNoGo		45											0																231
FamIncongFirst	3	12	ReverseGo		45					1																394
FamIncongFirst	3	13	ReverseGo		45					1																349
FamIncongFirst	3	14	ReverseGo		45					1																316
FamIncongFirst	3	15	ReverseGo		45					1																355
FamIncongFirst	3	16	ReverseGo		45					1																241
FamIncongFirst	3	17	ReverseGo		45					1																284
FamIncongFirst	3	18	ReverseGo		45					1																301
FamIncongFirst	3	19	ReverseGo		45					1																325
FamIncongFirst	3	20	ReverseGo		45					1																307
FamIncongFirst	3	21	ReverseNoGo		45											1																0
FamIncongFirst	3	22	ReverseGo		45					1																295
FamIncongFirst	3	23	ReverseGo		45					1																295
FamIncongFirst	3	24	ReverseGo		45					1																223
FamIncongFirst	3	25	ReverseNoGo		45											0																251
FamIncongFirst	3	26	ReverseGo		45					1																389
FamIncongFirst	3	27	ReverseGo		45					1																346
FamIncongFirst	3	28	ReverseGo		45					1																295
FamIncongFirst	3	29	ReverseGo		45					0																0
FamIncongFirst	3	30	ReverseNoGo		45											1																0
FamIncongFirst	3	31	ReverseGo		45					1																383
FamIncongFirst	3	32	ReverseGo		45					0																0
FamIncongFirst	3	33	ReverseNoGo		45											0																249
FamIncongFirst	3	34	ReverseGo		45					1																339
FamIncongFirst	3	35	ReverseGo		45					1																338
FamIncongFirst	3	36	ReverseGo		45					1																279
FamIncongFirst	3	37	ReverseGo		45					1																328
FamIncongFirst	3	38	ReverseGo		45					1																255
FamIncongFirst	3	39	ReverseGo		45					1																305
FamIncongFirst	3	40	ReverseGo		45					1																321
FamIncongFirst	3	41	ReverseGo		45					1																241
FamIncongFirst	3	42	ReverseGo		45					1																307
FamIncongFirst	3	43	ReverseGo		45					1																324
FamIncongFirst	3	44	ReverseGo		45					1																235
FamIncongFirst	3	45	ReverseNoGo		45											0																253
FamIncongFirst	3	46	ReverseGo		45					0																0
FamIncongFirst	3	47	ReverseGo		45					1																252
FamIncongFirst	3	48	ReverseGo		45					1																310
FamIncongFirst	3	49	ReverseGo		45					1																341
FamIncongFirst	3	50	ReverseGo		45					1																309
FamIncongFirst	3	51	ReverseGo		45					1																324
FamIncongFirst	3	52	ReverseNoGo		45											0																268
FamIncongFirst	3	53	ReverseGo		45					1																292
FamIncongFirst	3	54	ReverseGo		45					1																340
FamIncongFirst	3	55	ReverseGo		45					1																227
FamIncongFirst	3	56	ReverseNoGo		45											1																0
FamIncongFirst	3	57	ReverseGo		45					1																298
FamIncongFirst	3	58	ReverseNoGo		45											0																338
FamIncongFirst	3	59	ReverseGo		45					1																361
FamIncongFirst	3	60	ReverseGo		45					1																366
FamIncongFirst	3	61	ReverseGo		45					1																332
FamIncongFirst	3	62	ReverseGo		45					1																322
FamIncongFirst	3	63	ReverseGo		45					0																0
FamIncongFirst	3	64	ReverseGo		45					1																302
FamIncongFirst	3	65	ReverseGo		45					1																262
FamIncongFirst	3	66	ReverseNoGo		45											1																0
FamIncongFirst	3	67	ReverseGo		45					1																219
FamIncongFirst	3	68	ReverseGo		45					1																335
FamIncongFirst	3	69	ReverseGo		45					1																310
FamIncongFirst	3	70	ReverseGo		45					1																317
FamIncongFirst	3	71	ReverseGo		45					1																276
FamIncongFirst	3	72	ReverseGo		45					1																268
FamIncongFirst	3	73	ReverseNoGo		45											0																318
FamIncongFirst	3	74	ReverseGo		45					1																318
FamIncongFirst	3	75	ReverseGo		45					1																333
FamIncongFirst	3	76	ReverseGo		45					1																276
FamIncongFirst	3	77	ReverseGo		45					0																0
FamIncongFirst	3	78	ReverseGo		45					1																304
FamIncongFirst	3	79	ReverseGo		45					1																264
FamIncongFirst	3	80	ReverseGo		45					1																225
FamIncongFirst	3	81	ReverseNoGo		45											0																301
FamIncongFirst	3	82	ReverseNoGo		45											0																229
FamIncongFirst	3	83	ReverseGo		45					0																0
FamIncongFirst	3	84	ReverseGo		45					1																276
FamIncongFirst	3	85	ReverseGo		45					1																373
FamIncongFirst	3	86	ReverseGo		45					1																322
FamIncongFirst	3	87	ReverseGo		45					1																273
FamIncongFirst	3	88	ReverseGo		45					1																266
FamIncongFirst	3	89	ReverseNoGo		45											0																284
FamIncongFirst	3	90	ReverseGo		45					1																332
FamIncongFirst	3	91	ReverseGo		45					1																283
FamIncongFirst	3	92	ReverseGo		45					1																332
FamIncongFirst	3	93	ReverseGo		45					1																299
FamIncongFirst	3	94	ReverseGo		45					1																339
FamIncongFirst	3	95	ReverseGo		45					1																329
FamIncongFirst	3	96	ReverseGo		45					1																328
FamIncongFirst	3	97	ReverseGo		45					1																311
FamIncongFirst	3	98	ReverseGo		45					1																295
FamIncongFirst	3	99	ReverseNoGo		45											1																0
FamIncongFirst	3	100	ReverseGo		45					1																315
FamIncongFirst	3	101	ReverseGo		45					1																266
FamIncongFirst	3	102	ReverseGo		45					1																267
FamIncongFirst	3	103	ReverseGo		45					1																309
FamIncongFirst	3	104	ReverseGo		45					1																260
FamIncongFirst	3	105	ReverseGo		45					1																269
FamIncongFirst	3	106	ReverseGo		45					1																318
FamIncongFirst	3	107	ReverseGo		45					1																301
FamIncongFirst	3	108	ReverseNoGo		45											1																0
FamIncongFirst	3	109	ReverseGo		45					1																354
FamIncongFirst	3	110	ReverseGo		45					1																345
FamIncongFirst	3	111	ReverseGo		45					1																247
FamIncongFirst	3	112	ReverseNoGo		45											1																0
FamIncongFirst	3	113	ReverseGo		45					1																284
FamIncongFirst	3	114	ReverseGo		45					1																341
FamIncongFirst	3	115	ReverseGo		45					1																212
FamIncongFirst	3	116	ReverseGo		45					1																256
FamIncongFirst	3	117	ReverseGo		45					1																393
FamIncongFirst	3	118	ReverseGo		45					1																310
FamIncongFirst	3	119	ReverseNoGo		45											0																293
FamIncongFirst	3	120	ReverseGo		45					1																340
FamIncongFirst	3	121	ReverseGo		45					1																267
FamIncongFirst	3	1	XGo	55				1																273
FamIncongFirst	3	2	XGo	55				1																331
FamIncongFirst	3	3	XGo	55				1																313
FamIncongFirst	3	4	XGo	55				1																289
FamIncongFirst	3	5	XGo	55				1																298
FamIncongFirst	3	6	XGo	55				1																329
FamIncongFirst	3	7	XNoGo	55														1																0
FamIncongFirst	3	8	XGo	55				1																324
FamIncongFirst	3	9	XGo	55				1																267
FamIncongFirst	3	10	XNoGo	55														1																0
FamIncongFirst	3	11	XGo	55				1																337
FamIncongFirst	3	12	XGo	55				1																271
FamIncongFirst	3	13	XGo	55				1																321
FamIncongFirst	3	14	XGo	55				1																248
FamIncongFirst	3	15	XGo	55				1																354
FamIncongFirst	3	16	XNoGo	55														1																0
FamIncongFirst	3	17	XGo	55				1																236
FamIncongFirst	3	18	XGo	55				1																263
FamIncongFirst	3	19	XNoGo	55														0																289
FamIncongFirst	3	20	XGo	55				1																313
FamIncongFirst	3	21	XGo	55				1																305
FamIncongFirst	3	22	XGo	55				1																305
FamIncongFirst	3	23	XGo	55				1																272
FamIncongFirst	3	24	XGo	55				1																298
FamIncongFirst	3	25	XGo	55				1																346
FamIncongFirst	3	26	XGo	55				1																296
FamIncongFirst	3	27	XGo	55				1																312
FamIncongFirst	3	28	XNoGo	55														1																0
FamIncongFirst	3	29	XGo	55				1																300
FamIncongFirst	3	30	XGo	55				1																235
FamIncongFirst	3	31	XGo	55				1																269
FamIncongFirst	3	32	XGo	55				1																295
FamIncongFirst	3	33	XGo	55				1																335
FamIncongFirst	3	34	XGo	55				1																254
FamIncongFirst	3	35	XGo	55				1																313
FamIncongFirst	3	36	XNoGo	55														0																296
FamIncongFirst	3	37	XGo	55				1																304
FamIncongFirst	3	38	XNoGo	55														0																313
FamIncongFirst	3	39	XGo	55				1																327
FamIncongFirst	3	40	XGo	55				1																326
FamIncongFirst	3	41	XGo	55				1																308
FamIncongFirst	3	42	XGo	55				1																276
FamIncongFirst	3	43	XGo	55				1																317
FamIncongFirst	3	44	XGo	55				1																332
FamIncongFirst	3	45	XGo	55				1																307
FamIncongFirst	3	46	XGo	55				1																364
FamIncongFirst	3	47	XNoGo	55														1																0
FamIncongFirst	3	48	XGo	55				1																332
FamIncongFirst	3	49	XGo	55				1																250
FamIncongFirst	3	50	XGo	55				1																325
FamIncongFirst	3	51	XGo	55				1																260
FamIncongFirst	3	52	XGo	55				1																301
FamIncongFirst	3	53	XNoGo	55														0																302
FamIncongFirst	3	54	XGo	55				1																318
FamIncongFirst	3	55	XGo	55				1																277
FamIncongFirst	3	56	XGo	55				1																253
FamIncongFirst	3	57	XNoGo	55														0																223
FamIncongFirst	3	58	XGo	55				1																267
FamIncongFirst	3	59	XGo	55				1																300
FamIncongFirst	3	60	XGo	55				0																0
FamIncongFirst	3	61	XGo	55				1																312
FamIncongFirst	3	62	XGo	55				1																296
FamIncongFirst	3	63	XNoGo	55														1																0
FamIncongFirst	3	64	XGo	55				1																299
FamIncongFirst	3	65	XGo	55				1																323
FamIncongFirst	3	66	XGo	55				1																274
FamIncongFirst	3	67	XGo	55				1																268
FamIncongFirst	3	68	XGo	55				1																286
FamIncongFirst	3	69	XGo	55				1																359
FamIncongFirst	3	70	XNoGo	55														1																0
FamIncongFirst	3	71	XGo	55				0																0
FamIncongFirst	3	72	XGo	55				1																259
FamIncongFirst	3	73	XNoGo	55														0																357
FamIncongFirst	3	74	XGo	55				1																307
FamIncongFirst	3	75	XGo	55				1																307
FamIncongFirst	3	76	XGo	55				1																331
FamIncongFirst	3	77	XGo	55				1																346
FamIncongFirst	3	78	XGo	55				1																329
FamIncongFirst	3	79	XGo	55				1																295
FamIncongFirst	3	80	XNoGo	55														1																0
FamIncongFirst	3	81	XNoGo	55														0																227
FamIncongFirst	3	82	XGo	55				1																301
FamIncongFirst	3	83	XGo	55				1																278
FamIncongFirst	3	84	XGo	55				1																262
FamIncongFirst	3	85	XGo	55				1																256
FamIncongFirst	3	86	XGo	55				1																250
FamIncongFirst	3	87	XGo	55				1																324
FamIncongFirst	3	88	XGo	55				1																300
FamIncongFirst	3	89	XGo	55				1																259
FamIncongFirst	3	90	XNoGo	55														1																0
FamIncongFirst	3	91	XGo	55				1																344
FamIncongFirst	3	92	XGo	55				1																375
FamIncongFirst	3	93	XGo	55				1																291
FamIncongFirst	3	94	XGo	55				1																292
FamIncongFirst	3	95	XGo	55				1																316
FamIncongFirst	3	96	XGo	55				1																292
FamIncongFirst	3	97	XGo	55				1																315
FamIncongFirst	3	98	XGo	55				1																266
FamIncongFirst	3	99	XNoGo	55														0																396
FamIncongFirst	3	100	XGo	55				0																0
FamIncongFirst	3	101	XGo	55				1																309
FamIncongFirst	3	102	XNoGo	55														1																0
FamIncongFirst	3	103	XGo	55				1																273
FamIncongFirst	3	104	XGo	55				1																250
FamIncongFirst	3	105	XGo	55				1																300
FamIncongFirst	3	106	XGo	55				1																322
FamIncongFirst	3	107	XGo	55				1																354
FamIncongFirst	3	108	XGo	55				1																305
FamIncongFirst	3	109	XGo	55				0																0
FamIncongFirst	3	110	XGo	55				1																229
FamIncongFirst	3	111	XNoGo	55														0																296
FamIncongFirst	3	112	XGo	55				1																240
FamIncongFirst	3	113	XGo	55				1																266
FamIncongFirst	3	114	XGo	55				1																283
FamIncongFirst	3	115	XGo	55				1																276
FamIncongFirst	3	116	XGo	55				1																317
FamIncongFirst	3	117	XGo	55				1																333
FamIncongFirst	3	118	XNoGo	55														1																0
FamIncongFirst	3	119	XGo	55				1																304
FamIncongFirst	3	120	XGo	55				1																264
FamIncongFirst	4	2	ReverseGo1		75						1																253
FamIncongFirst	4	3	ReverseGo1		75						1																303
FamIncongFirst	4	4	ReverseGo1		75						1																375
FamIncongFirst	4	5	ReverseGo1		75						1																261
FamIncongFirst	4	6	ReverseGo1		75						1																326
FamIncongFirst	4	7	ReverseGo1		75						1																252
FamIncongFirst	4	8	ReverseGo1		75						1																270
FamIncongFirst	4	9	ReverseNoGo1		75												1																0
FamIncongFirst	4	10	ReverseGo1		75						1																395
FamIncongFirst	4	11	ReverseNoGo1		75												1																0
FamIncongFirst	4	12	ReverseGo1		75						1																356
FamIncongFirst	4	13	ReverseGo1		75						1																322
FamIncongFirst	4	14	ReverseGo1		75						1																233
FamIncongFirst	4	15	ReverseGo1		75						1																348
FamIncongFirst	4	16	ReverseGo1		75						1																330
FamIncongFirst	4	17	ReverseGo1		75						1																296
FamIncongFirst	4	18	ReverseNoGo1		75												1																0
FamIncongFirst	4	19	ReverseNoGo1		75												1																0
FamIncongFirst	4	20	ReverseGo1		75						1																345
FamIncongFirst	4	21	ReverseGo1		75						1																375
FamIncongFirst	4	22	ReverseGo1		75						1																300
FamIncongFirst	4	23	ReverseGo1		75						0																0
FamIncongFirst	4	24	ReverseGo1		75						1																312
FamIncongFirst	4	25	ReverseNoGo1		75												1																0
FamIncongFirst	4	26	ReverseGo1		75						1																307
FamIncongFirst	4	27	ReverseGo1		75						1																283
FamIncongFirst	4	28	ReverseGo1		75						1																260
FamIncongFirst	4	29	ReverseGo1		75						1																309
FamIncongFirst	4	30	ReverseNoGo1		75												1																0
FamIncongFirst	4	31	ReverseGo1		75						1																281
FamIncongFirst	4	32	ReverseGo1		75						1																258
FamIncongFirst	4	33	ReverseGo1		75						1																267
FamIncongFirst	4	34	ReverseGo1		75						1																300
FamIncongFirst	4	35	ReverseGo1		75						1																301
FamIncongFirst	4	36	ReverseGo1		75						1																277
FamIncongFirst	4	37	ReverseNoGo1		75												1																0
FamIncongFirst	4	38	ReverseGo1		75						1																314
FamIncongFirst	4	39	ReverseGo1		75						1																322
FamIncongFirst	4	40	ReverseGo1		75						1																281
FamIncongFirst	4	41	ReverseGo1		75						1																368
FamIncongFirst	4	42	ReverseNoGo1		75												1																0
FamIncongFirst	4	43	ReverseGo1		75						1																258
FamIncongFirst	4	44	ReverseGo1		75						1																316
FamIncongFirst	4	45	ReverseGo1		75						1																307
FamIncongFirst	4	46	ReverseGo1		75						1																268
FamIncongFirst	4	47	ReverseGo1		75						1																301
FamIncongFirst	4	48	ReverseGo1		75						1																349
FamIncongFirst	4	49	ReverseNoGo1		75												1																0
FamIncongFirst	4	50	ReverseGo1		75						1																311
FamIncongFirst	4	51	ReverseGo1		75						1																270
FamIncongFirst	4	52	ReverseGo1		75						1																288
FamIncongFirst	4	53	ReverseGo1		75						1																280
FamIncongFirst	4	54	ReverseGo1		75						1																289
FamIncongFirst	4	55	ReverseGo1		75						1																274
FamIncongFirst	4	56	ReverseGo1		75						1																316
FamIncongFirst	4	57	ReverseNoGo1		75												0																275
FamIncongFirst	4	58	ReverseGo1		75						1																308
FamIncongFirst	4	59	ReverseGo1		75						1																267
FamIncongFirst	4	60	ReverseNoGo1		75												1																0
FamIncongFirst	4	61	ReverseGo1		75						1																344
FamIncongFirst	4	62	ReverseGo1		75						1																390
FamIncongFirst	4	63	ReverseGo1		75						1																339
FamIncongFirst	4	64	ReverseGo1		75						1																354
FamIncongFirst	4	65	ReverseGo1		75						1																288
FamIncongFirst	4	66	ReverseGo1		75						1																264
FamIncongFirst	4	67	ReverseGo1		75						1																322
FamIncongFirst	4	68	ReverseNoGo1		75												1																0
FamIncongFirst	4	69	ReverseGo1		75						1																333
FamIncongFirst	4	70	ReverseGo1		75						1																356
FamIncongFirst	4	71	ReverseGo1		75						1																266
FamIncongFirst	4	72	ReverseGo1		75						1																292
FamIncongFirst	4	73	ReverseNoGo1		75												1																0
FamIncongFirst	4	74	ReverseGo1		75						1																384
FamIncongFirst	4	75	ReverseGo1		75						1																332
FamIncongFirst	4	76	ReverseGo1		75						1																323
FamIncongFirst	4	77	ReverseGo1		75						1																322
FamIncongFirst	4	78	ReverseNoGo1		75												1																0
FamIncongFirst	4	79	ReverseGo1		75						1																365
FamIncongFirst	4	80	ReverseGo1		75						1																371
FamIncongFirst	4	81	ReverseGo1		75						1																329
FamIncongFirst	4	82	ReverseGo1		75						1																351
FamIncongFirst	4	83	ReverseGo1		75						1																380
FamIncongFirst	4	84	ReverseGo1		75						1																289
FamIncongFirst	4	85	ReverseGo1		75						1																338
FamIncongFirst	4	86	ReverseGo1		75						1																305
FamIncongFirst	4	87	ReverseGo1		75						1																281
FamIncongFirst	4	88	ReverseNoGo1		75												0																386
FamIncongFirst	4	89	ReverseGo1		75						0																0
FamIncongFirst	4	90	ReverseGo1		75						1																347
FamIncongFirst	4	91	ReverseGo1		75						0																0
FamIncongFirst	4	92	ReverseGo1		75						1																324
FamIncongFirst	4	93	ReverseGo1		75						1																315
FamIncongFirst	4	94	ReverseGo1		75						1																362
FamIncongFirst	4	95	ReverseNoGo1		75												0																344
FamIncongFirst	4	96	ReverseNoGo1		75												1																0
FamIncongFirst	4	97	ReverseGo1		75						1																354
FamIncongFirst	4	98	ReverseGo1		75						1																353
FamIncongFirst	4	99	ReverseGo1		75						1																351
FamIncongFirst	4	100	ReverseGo1		75						1																340
FamIncongFirst	4	101	ReverseGo1		75						1																330
FamIncongFirst	4	102	ReverseGo1		75						1																305
FamIncongFirst	4	103	ReverseNoGo1		75												1																0
FamIncongFirst	4	104	ReverseGo1		75						1																390
FamIncongFirst	4	105	ReverseGo1		75						1																346
FamIncongFirst	4	106	ReverseGo1		75						0																0
FamIncongFirst	4	107	ReverseGo1		75						1																277
FamIncongFirst	4	108	ReverseGo1		75						1																309
FamIncongFirst	4	109	ReverseGo1		75						1																300
FamIncongFirst	4	110	ReverseNoGo1		75												0																349
FamIncongFirst	4	111	ReverseGo1		75						1																299
FamIncongFirst	4	112	ReverseGo1		75						1																323
FamIncongFirst	4	113	ReverseGo1		75						1																370
FamIncongFirst	4	114	ReverseGo1		75						0																0
FamIncongFirst	4	115	ReverseGo1		75						1																300
FamIncongFirst	4	116	ReverseGo1		75						1																267
FamIncongFirst	4	117	ReverseGo1		75						1																300
FamIncongFirst	4	118	ReverseGo1		75						1																252
FamIncongFirst	4	119	ReverseGo1		75						1																278
FamIncongFirst	4	120	ReverseNoGo1		75												0																311
FamIncongFirst	4	121	ReverseGo1		75						1																327
FamIncongFirst	4	1	XGo1	70					1																325
FamIncongFirst	4	2	XGo1	70					1																300
FamIncongFirst	4	3	XGo1	70					1																300
FamIncongFirst	4	4	XGo1	70					1																261
FamIncongFirst	4	5	XGo1	70					1																261
FamIncongFirst	4	6	XNoGo1	70															0																319
FamIncongFirst	4	7	XNoGo1	70															1																0
FamIncongFirst	4	8	XGo1	70					0																0
FamIncongFirst	4	9	XGo1	70					1																359
FamIncongFirst	4	10	XGo1	70					1																300
FamIncongFirst	4	11	XGo1	70					1																293
FamIncongFirst	4	12	XNoGo1	70															1																0
FamIncongFirst	4	13	XGo1	70					1																287
FamIncongFirst	4	14	XGo1	70					1																336
FamIncongFirst	4	15	XNoGo1	70															0																367
FamIncongFirst	4	16	XGo1	70					1																317
FamIncongFirst	4	17	XGo1	70					1																356
FamIncongFirst	4	18	XGo1	70					1																323
FamIncongFirst	4	19	XGo1	70					0																0
FamIncongFirst	4	20	XGo1	70					1																334
FamIncongFirst	4	21	XGo1	70					1																373
FamIncongFirst	4	22	XGo1	70					1																345
FamIncongFirst	4	23	XNoGo1	70															1																0
FamIncongFirst	4	24	XGo1	70					1																387
FamIncongFirst	4	25	XGo1	70					0																0
FamIncongFirst	4	26	XNoGo1	70															1																0
FamIncongFirst	4	27	XNoGo1	70															1																0
FamIncongFirst	4	28	XGo1	70					1																324
FamIncongFirst	4	29	XGo1	70					1																292
FamIncongFirst	4	30	XGo1	70					1																308
FamIncongFirst	4	31	XGo1	70					1																284
FamIncongFirst	4	32	XNoGo1	70															1																0
FamIncongFirst	4	33	XGo1	70					1																257
FamIncongFirst	4	34	XGo1	70					0																0
FamIncongFirst	4	35	XGo1	70					1																287
FamIncongFirst	4	36	XGo1	70					1																256
FamIncongFirst	4	37	XNoGo1	70															0																267
FamIncongFirst	4	38	XGo1	70					1																300
FamIncongFirst	4	39	XGo1	70					1																323
FamIncongFirst	4	40	XGo1	70					1																266
FamIncongFirst	4	41	XNoGo1	70															1																0
FamIncongFirst	4	42	XGo1	70					1																328
FamIncongFirst	4	43	XGo1	70					1																319
FamIncongFirst	4	44	XGo1	70					1																318
FamIncongFirst	4	45	XGo1	70					1																294
FamIncongFirst	4	46	XGo1	70					1																238
FamIncongFirst	4	47	XGo1	70					1																232
FamIncongFirst	4	48	XGo1	70					1																251
FamIncongFirst	4	49	XNoGo1	70															1																0
FamIncongFirst	4	50	XGo1	70					1																289
FamIncongFirst	4	51	XGo1	70					1																274
FamIncongFirst	4	52	XGo1	70					1																276
FamIncongFirst	4	53	XGo1	70					1																293
FamIncongFirst	4	54	XGo1	70					1																317
FamIncongFirst	4	55	XGo1	70					1																228
FamIncongFirst	4	56	XGo1	70					1																246
FamIncongFirst	4	57	XGo1	70					1																281
FamIncongFirst	4	58	XGo1	70					0																0
FamIncongFirst	4	59	XGo1	70					1																269
FamIncongFirst	4	60	XGo1	70					1																279
FamIncongFirst	4	61	XGo1	70					1																248
FamIncongFirst	4	62	XGo1	70					1																226
FamIncongFirst	4	63	XGo1	70					1																317
FamIncongFirst	4	64	XNoGo1	70															1																0
FamIncongFirst	4	65	XGo1	70					1																335
FamIncongFirst	4	66	XGo1	70					1																303
FamIncongFirst	4	67	XNoGo1	70															1																0
FamIncongFirst	4	68	XGo1	70					1																234
FamIncongFirst	4	69	XGo1	70					1																309
FamIncongFirst	4	70	XGo1	70					1																269
FamIncongFirst	4	71	XGo1	70					1																270
FamIncongFirst	4	72	XGo1	70					1																311
FamIncongFirst	4	73	XGo1	70					1																326
FamIncongFirst	4	74	XGo1	70					0																0
FamIncongFirst	4	75	XGo1	70					1																313
FamIncongFirst	4	76	XGo1	70					1																369
FamIncongFirst	4	77	XNoGo1	70															1																0
FamIncongFirst	4	78	XGo1	70					1																267
FamIncongFirst	4	79	XGo1	70					1																268
FamIncongFirst	4	80	XGo1	70					1																284
FamIncongFirst	4	81	XGo1	70					1																301
FamIncongFirst	4	82	XGo1	70					1																293
FamIncongFirst	4	83	XGo1	70					1																293
FamIncongFirst	4	84	XGo1	70					0																0
FamIncongFirst	4	85	XGo1	70					1																314
FamIncongFirst	4	86	XGo1	70					1																274
FamIncongFirst	4	87	XNoGo1	70															0																251
FamIncongFirst	4	88	XGo1	70					1																253
FamIncongFirst	4	89	XGo1	70					1																278
FamIncongFirst	4	90	XGo1	70					1																286
FamIncongFirst	4	91	XGo1	70					1																320
FamIncongFirst	4	92	XNoGo1	70															1																0
FamIncongFirst	4	93	XGo1	70					1																275
FamIncongFirst	4	94	XGo1	70					1																324
FamIncongFirst	4	95	XGo1	70					1																251
FamIncongFirst	4	96	XNoGo1	70															1																0
FamIncongFirst	4	97	XGo1	70					1																289
FamIncongFirst	4	98	XGo1	70					1																241
FamIncongFirst	4	99	XGo1	70					1																260
FamIncongFirst	4	100	XGo1	70					1																317
FamIncongFirst	4	101	XGo1	70					1																316
FamIncongFirst	4	102	XGo1	70					1																340
FamIncongFirst	4	103	XGo1	70					1																275
FamIncongFirst	4	104	XGo1	70					1																268
FamIncongFirst	4	105	XGo1	70					1																262
FamIncongFirst	4	106	XNoGo1	70															0																262
FamIncongFirst	4	107	XGo1	70					0																0
FamIncongFirst	4	108	XGo1	70					1																300
FamIncongFirst	4	109	XGo1	70					1																364
FamIncongFirst	4	110	XGo1	70					1																289
FamIncongFirst	4	111	XGo1	70					1																283
FamIncongFirst	4	112	XNoGo1	70															0																227
FamIncongFirst	4	113	XGo1	70					1																374
FamIncongFirst	4	114	XGo1	70					1																299
FamIncongFirst	4	115	XNoGo1	70															1																0
FamIncongFirst	4	116	XGo1	70					1																287
FamIncongFirst	4	117	XGo1	70					1																336
FamIncongFirst	4	118	XGo1	70					1																286
FamIncongFirst	4	119	XGo1	70					1																327
FamIncongFirst	4	120	XGo1	70					1																366
FamIncongFirst	7	2	ReverseGo		80					1																338
FamIncongFirst	7	3	ReverseGo		80					1																296
FamIncongFirst	7	4	ReverseNoGo		80											1																0
FamIncongFirst	7	5	ReverseGo		80					0																0
FamIncongFirst	7	6	ReverseGo		80					1																297
FamIncongFirst	7	7	ReverseGo		80					1																376
FamIncongFirst	7	8	ReverseGo		80					1																333
FamIncongFirst	7	9	ReverseGo		80					1																308
FamIncongFirst	7	10	ReverseNoGo		80											1																0
FamIncongFirst	7	11	ReverseNoGo		80											1																0
FamIncongFirst	7	12	ReverseGo		80					1																275
FamIncongFirst	7	13	ReverseGo		80					0																0
FamIncongFirst	7	14	ReverseGo		80					0																0
FamIncongFirst	7	15	ReverseGo		80					0																0
FamIncongFirst	7	16	ReverseGo		80					1																240
FamIncongFirst	7	17	ReverseGo		80					1																259
FamIncongFirst	7	18	ReverseGo		80					1																277
FamIncongFirst	7	19	ReverseGo		80					1																270
FamIncongFirst	7	20	ReverseGo		80					1																262
FamIncongFirst	7	21	ReverseNoGo		80											0																320
FamIncongFirst	7	22	ReverseGo		80					1																295
FamIncongFirst	7	23	ReverseGo		80					1																328
FamIncongFirst	7	24	ReverseGo		80					1																286
FamIncongFirst	7	25	ReverseNoGo		80											1																0
FamIncongFirst	7	26	ReverseGo		80					1																251
FamIncongFirst	7	27	ReverseGo		80					1																285
FamIncongFirst	7	28	ReverseGo		80					1																285
FamIncongFirst	7	29	ReverseGo		80					1																270
FamIncongFirst	7	30	ReverseNoGo		80											1																0
FamIncongFirst	7	31	ReverseGo		80					1																284
FamIncongFirst	7	32	ReverseGo		80					1																269
FamIncongFirst	7	33	ReverseNoGo		80											1																0
FamIncongFirst	7	34	ReverseGo		80					1																274
FamIncongFirst	7	35	ReverseGo		80					1																348
FamIncongFirst	7	36	ReverseGo		80					0																0
FamIncongFirst	7	37	ReverseGo		80					1																285
FamIncongFirst	7	38	ReverseGo		80					1																270
FamIncongFirst	7	39	ReverseGo		80					1																336
FamIncongFirst	7	40	ReverseGo		80					1																271
FamIncongFirst	7	41	ReverseGo		80					1																312
FamIncongFirst	7	42	ReverseGo		80					1																271
FamIncongFirst	7	43	ReverseGo		80					1																273
FamIncongFirst	7	44	ReverseGo		80					1																347
FamIncongFirst	7	45	ReverseNoGo		80											1																0
FamIncongFirst	7	46	ReverseGo		80					0																0
FamIncongFirst	7	47	ReverseGo		80					1																296
FamIncongFirst	7	48	ReverseGo		80					1																304
FamIncongFirst	7	49	ReverseGo		80					1																360
FamIncongFirst	7	50	ReverseGo		80					1																318
FamIncongFirst	7	51	ReverseGo		80					1																357
FamIncongFirst	7	52	ReverseNoGo		80											1																0
FamIncongFirst	7	53	ReverseGo		80					1																278
FamIncongFirst	7	54	ReverseGo		80					1																239
FamIncongFirst	7	55	ReverseGo		80					1																298
FamIncongFirst	7	56	ReverseNoGo		80											1																0
FamIncongFirst	7	57	ReverseGo		80					1																310
FamIncongFirst	7	58	ReverseNoGo		80											1																0
FamIncongFirst	7	59	ReverseGo		80					1																249
FamIncongFirst	7	60	ReverseGo		80					1																292
FamIncongFirst	7	61	ReverseGo		80					1																372
FamIncongFirst	7	62	ReverseGo		80					1																289
FamIncongFirst	7	63	ReverseGo		80					1																370
FamIncongFirst	7	64	ReverseGo		80					1																296
FamIncongFirst	7	65	ReverseGo		80					1																280
FamIncongFirst	7	66	ReverseNoGo		80											1																0
FamIncongFirst	7	67	ReverseGo		80					1																292
FamIncongFirst	7	68	ReverseGo		80					1																317
FamIncongFirst	7	69	ReverseGo		80					1																324
FamIncongFirst	7	70	ReverseGo		80					0																0
FamIncongFirst	7	71	ReverseGo		80					1																311
FamIncongFirst	7	72	ReverseGo		80					1																335
FamIncongFirst	7	73	ReverseNoGo		80											1																0
FamIncongFirst	7	74	ReverseGo		80					1																290
FamIncongFirst	7	75	ReverseGo		80					1																370
FamIncongFirst	7	76	ReverseGo		80					0																0
FamIncongFirst	7	77	ReverseGo		80					1																300
FamIncongFirst	7	78	ReverseGo		80					0																0
FamIncongFirst	7	79	ReverseGo		80					1																311
FamIncongFirst	7	80	ReverseGo		80					1																327
FamIncongFirst	7	81	ReverseNoGo		80											0																365
FamIncongFirst	7	82	ReverseNoGo		80											1																0
FamIncongFirst	7	83	ReverseGo		80					0																0
FamIncongFirst	7	84	ReverseGo		80					1																323
FamIncongFirst	7	85	ReverseGo		80					1																299
FamIncongFirst	7	86	ReverseGo		80					0																0
FamIncongFirst	7	87	ReverseGo		80					0																0
FamIncongFirst	7	88	ReverseGo		80					1																274
FamIncongFirst	7	89	ReverseNoGo		80											0																363
FamIncongFirst	7	90	ReverseGo		80					1																297
FamIncongFirst	7	91	ReverseGo		80					0																0
FamIncongFirst	7	92	ReverseGo		80					1																309
FamIncongFirst	7	93	ReverseGo		80					1																325
FamIncongFirst	7	94	ReverseGo		80					1																283
FamIncongFirst	7	95	ReverseGo		80					1																268
FamIncongFirst	7	96	ReverseGo		80					1																285
FamIncongFirst	7	97	ReverseGo		80					1																294
FamIncongFirst	7	98	ReverseGo		80					1																343
FamIncongFirst	7	99	ReverseNoGo		80											1																0
FamIncongFirst	7	100	ReverseGo		80					1																288
FamIncongFirst	7	101	ReverseGo		80					0																0
FamIncongFirst	7	102	ReverseGo		80					1																309
FamIncongFirst	7	103	ReverseGo		80					1																292
FamIncongFirst	7	104	ReverseGo		80					0																0
FamIncongFirst	7	105	ReverseGo		80					1																369
FamIncongFirst	7	106	ReverseGo		80					0																0
FamIncongFirst	7	107	ReverseGo		80					1																274
FamIncongFirst	7	108	ReverseNoGo		80											1																0
FamIncongFirst	7	109	ReverseGo		80					1																336
FamIncongFirst	7	110	ReverseGo		80					1																342
FamIncongFirst	7	111	ReverseGo		80					1																243
FamIncongFirst	7	112	ReverseNoGo		80											0																374
FamIncongFirst	7	113	ReverseGo		80					1																267
FamIncongFirst	7	114	ReverseGo		80					1																389
FamIncongFirst	7	115	ReverseGo		80					1																281
FamIncongFirst	7	116	ReverseGo		80					0																0
FamIncongFirst	7	117	ReverseGo		80					1																279
FamIncongFirst	7	118	ReverseGo		80					1																263
FamIncongFirst	7	119	ReverseNoGo		80											1																0
FamIncongFirst	7	120	ReverseGo		80					1																372
FamIncongFirst	7	121	ReverseGo		80					1																322
FamIncongFirst	7	1	XGo	70				1																362
FamIncongFirst	7	2	XGo	70				1																319
FamIncongFirst	7	3	XGo	70				1																246
FamIncongFirst	7	4	XGo	70				1																248
FamIncongFirst	7	5	XGo	70				1																242
FamIncongFirst	7	6	XGo	70				1																324
FamIncongFirst	7	7	XNoGo	70														1																0
FamIncongFirst	7	8	XGo	70				1																280
FamIncongFirst	7	9	XGo	70				1																289
FamIncongFirst	7	10	XNoGo	70														1																0
FamIncongFirst	7	11	XGo	70				1																293
FamIncongFirst	7	12	XGo	70				1																365
FamIncongFirst	7	13	XGo	70				1																379
FamIncongFirst	7	14	XGo	70				0																0
FamIncongFirst	7	15	XGo	70				1																292
FamIncongFirst	7	16	XNoGo	70														0																284
FamIncongFirst	7	17	XGo	70				1																310
FamIncongFirst	7	18	XGo	70				1																284
FamIncongFirst	7	19	XNoGo	70														1																0
FamIncongFirst	7	20	XGo	70				1																225
FamIncongFirst	7	21	XGo	70				1																315
FamIncongFirst	7	22	XGo	70				0																0
FamIncongFirst	7	23	XGo	70				1																367
FamIncongFirst	7	24	XGo	70				1																253
FamIncongFirst	7	25	XGo	70				1																278
FamIncongFirst	7	26	XGo	70				1																295
FamIncongFirst	7	27	XGo	70				1																390
FamIncongFirst	7	28	XNoGo	70														1																0
FamIncongFirst	7	29	XGo	70				1																256
FamIncongFirst	7	30	XGo	70				1																258
FamIncongFirst	7	31	XGo	70				1																261
FamIncongFirst	7	32	XGo	70				0																0
FamIncongFirst	7	33	XGo	70				1																258
FamIncongFirst	7	34	XGo	70				1																364
FamIncongFirst	7	35	XGo	70				0																0
FamIncongFirst	7	36	XNoGo	70														0																277
FamIncongFirst	7	37	XGo	70				1																326
FamIncongFirst	7	38	XNoGo	70														1																0
FamIncongFirst	7	39	XGo	70				1																369
FamIncongFirst	7	40	XGo	70				1																262
FamIncongFirst	7	41	XGo	70				1																392
FamIncongFirst	7	42	XGo	70				1																332
FamIncongFirst	7	43	XGo	70				1																323
FamIncongFirst	7	44	XGo	70				0																0
FamIncongFirst	7	45	XGo	70				1																262
FamIncongFirst	7	46	XGo	70				1																248
FamIncongFirst	7	47	XNoGo	70														1																0
FamIncongFirst	7	48	XGo	70				1																277
FamIncongFirst	7	49	XGo	70				1																327
FamIncongFirst	7	50	XGo	70				1																309
FamIncongFirst	7	51	XGo	70				1																292
FamIncongFirst	7	52	XGo	70				0																0
FamIncongFirst	7	53	XNoGo	70														1																0
FamIncongFirst	7	54	XGo	70				1																235
FamIncongFirst	7	55	XGo	70				1																383
FamIncongFirst	7	56	XGo	70				1																324
FamIncongFirst	7	57	XNoGo	70														1																0
FamIncongFirst	7	58	XGo	70				0																0
FamIncongFirst	7	59	XGo	70				1																339
FamIncongFirst	7	60	XGo	70				1																225
FamIncongFirst	7	61	XGo	70				1																267
FamIncongFirst	7	62	XGo	70				1																269
FamIncongFirst	7	63	XNoGo	70														1																0
FamIncongFirst	7	64	XGo	70				1																243
FamIncongFirst	7	65	XGo	70				1																269
FamIncongFirst	7	66	XGo	70				1																295
FamIncongFirst	7	67	XGo	70				1																247
FamIncongFirst	7	68	XGo	70				1																264
FamIncongFirst	7	69	XGo	70				1																282
FamIncongFirst	7	70	XNoGo	70														0																291
FamIncongFirst	7	71	XGo	70				1																220
FamIncongFirst	7	72	XGo	70				1																279
FamIncongFirst	7	73	XNoGo	70														1																0
FamIncongFirst	7	74	XGo	70				1																268
FamIncongFirst	7	75	XGo	70				0																0
FamIncongFirst	7	76	XGo	70				1																346
FamIncongFirst	7	77	XGo	70				1																303
FamIncongFirst	7	78	XGo	70				1																271
FamIncongFirst	7	79	XGo	70				1																257
FamIncongFirst	7	80	XNoGo	70														1																0
FamIncongFirst	7	81	XNoGo	70														0																263
FamIncongFirst	7	82	XGo	70				1																289
FamIncongFirst	7	83	XGo	70				1																282
FamIncongFirst	7	84	XGo	70				1																346
FamIncongFirst	7	85	XGo	70				1																311
FamIncongFirst	7	86	XGo	70				1																294
FamIncongFirst	7	87	XGo	70				1																327
FamIncongFirst	7	88	XGo	70				1																286
FamIncongFirst	7	89	XGo	70				1																286
FamIncongFirst	7	90	XNoGo	70														0																239
FamIncongFirst	7	91	XGo	70				1																330
FamIncongFirst	7	92	XGo	70				1																321
FamIncongFirst	7	93	XGo	70				1																353
FamIncongFirst	7	94	XGo	70				1																262
FamIncongFirst	7	95	XGo	70				1																288
FamIncongFirst	7	96	XGo	70				1																304
FamIncongFirst	7	97	XGo	70				1																280
FamIncongFirst	7	98	XGo	70				1																297
FamIncongFirst	7	99	XNoGo	70														1																0
FamIncongFirst	7	100	XGo	70				1																381
FamIncongFirst	7	101	XGo	70				1																298
FamIncongFirst	7	102	XNoGo	70														1																0
FamIncongFirst	7	103	XGo	70				0																0
FamIncongFirst	7	104	XGo	70				1																377
FamIncongFirst	7	105	XGo	70				1																263
FamIncongFirst	7	106	XGo	70				1																304
FamIncongFirst	7	107	XGo	70				0																0
FamIncongFirst	7	108	XGo	70				1																332
FamIncongFirst	7	109	XGo	70				0																0
FamIncongFirst	7	110	XGo	70				1																302
FamIncongFirst	7	111	XNoGo	70														0																342
FamIncongFirst	7	112	XGo	70				0																0
FamIncongFirst	7	113	XGo	70				1																288
FamIncongFirst	7	114	XGo	70				1																313
FamIncongFirst	7	115	XGo	70				1																241
FamIncongFirst	7	116	XGo	70				1																300
FamIncongFirst	7	117	XGo	70				1																275
FamIncongFirst	7	118	XNoGo	70														1																0
FamIncongFirst	7	119	XGo	70				1																312
FamIncongFirst	7	120	XGo	70				0																0
FamIncongFirst	8	2	ReverseGo1		95						0																0
FamIncongFirst	8	3	ReverseGo1		95						1																318
FamIncongFirst	8	4	ReverseGo1		95						1																342
FamIncongFirst	8	5	ReverseGo1		95						1																291
FamIncongFirst	8	6	ReverseGo1		95						1																331
FamIncongFirst	8	7	ReverseGo1		95						1																281
FamIncongFirst	8	8	ReverseGo1		95						1																307
FamIncongFirst	8	9	ReverseNoGo1		95												1																0
FamIncongFirst	8	10	ReverseGo1		95						1																343
FamIncongFirst	8	11	ReverseNoGo1		95												1																0
FamIncongFirst	8	12	ReverseGo1		95						1																313
FamIncongFirst	8	13	ReverseGo1		95						1																313
FamIncongFirst	8	14	ReverseGo1		95						1																319
FamIncongFirst	8	15	ReverseGo1		95						1																319
FamIncongFirst	8	16	ReverseGo1		95						1																278
FamIncongFirst	8	17	ReverseGo1		95						1																279
FamIncongFirst	8	18	ReverseNoGo1		95												1																0
FamIncongFirst	8	19	ReverseNoGo1		95												1																0
FamIncongFirst	8	20	ReverseGo1		95						1																312
FamIncongFirst	8	21	ReverseGo1		95						1																320
FamIncongFirst	8	22	ReverseGo1		95						1																350
FamIncongFirst	8	23	ReverseGo1		95						1																340
FamIncongFirst	8	24	ReverseGo1		95						1																291
FamIncongFirst	8	25	ReverseNoGo1		95												1																0
FamIncongFirst	8	26	ReverseGo1		95						1																344
FamIncongFirst	8	27	ReverseGo1		95						1																310
FamIncongFirst	8	28	ReverseGo1		95						1																254
FamIncongFirst	8	29	ReverseGo1		95						1																280
FamIncongFirst	8	30	ReverseNoGo1		95												1																0
FamIncongFirst	8	31	ReverseGo1		95						0																0
FamIncongFirst	8	32	ReverseGo1		95						1																328
FamIncongFirst	8	33	ReverseGo1		95						1																303
FamIncongFirst	8	34	ReverseGo1		95						1																359
FamIncongFirst	8	35	ReverseGo1		95						1																317
FamIncongFirst	8	36	ReverseGo1		95						1																316
FamIncongFirst	8	37	ReverseNoGo1		95												1																0
FamIncongFirst	8	38	ReverseGo1		95						1																376
FamIncongFirst	8	39	ReverseGo1		95						1																348
FamIncongFirst	8	40	ReverseGo1		95						1																354
FamIncongFirst	8	41	ReverseGo1		95						1																320
FamIncongFirst	8	42	ReverseNoGo1		95												1																0
FamIncongFirst	8	43	ReverseGo1		95						1																283
FamIncongFirst	8	44	ReverseGo1		95						1																332
FamIncongFirst	8	45	ReverseGo1		95						1																307
FamIncongFirst	8	46	ReverseGo1		95						1																347
FamIncongFirst	8	47	ReverseGo1		95						1																369
FamIncongFirst	8	48	ReverseGo1		95						1																302
FamIncongFirst	8	49	ReverseNoGo1		95												1																0
FamIncongFirst	8	50	ReverseGo1		95						1																378
FamIncongFirst	8	51	ReverseGo1		95						1																310
FamIncongFirst	8	52	ReverseGo1		95						1																294
FamIncongFirst	8	53	ReverseGo1		95						1																326
FamIncongFirst	8	54	ReverseGo1		95						1																341
FamIncongFirst	8	55	ReverseGo1		95						1																298
FamIncongFirst	8	56	ReverseGo1		95						1																299
FamIncongFirst	8	57	ReverseNoGo1		95												1																0
FamIncongFirst	8	58	ReverseGo1		95						1																303
FamIncongFirst	8	59	ReverseGo1		95						1																287
FamIncongFirst	8	60	ReverseNoGo1		95												1																0
FamIncongFirst	8	61	ReverseGo1		95						1																284
FamIncongFirst	8	62	ReverseGo1		95						1																293
FamIncongFirst	8	63	ReverseGo1		95						1																357
FamIncongFirst	8	64	ReverseGo1		95						1																282
FamIncongFirst	8	65	ReverseGo1		95						1																323
FamIncongFirst	8	66	ReverseGo1		95						1																298
FamIncongFirst	8	67	ReverseGo1		95						1																395
FamIncongFirst	8	68	ReverseNoGo1		95												1																0
FamIncongFirst	8	69	ReverseGo1		95						1																339
FamIncongFirst	8	70	ReverseGo1		95						1																298
FamIncongFirst	8	71	ReverseGo1		95						1																322
FamIncongFirst	8	72	ReverseGo1		95						1																336
FamIncongFirst	8	73	ReverseNoGo1		95												1																0
FamIncongFirst	8	74	ReverseGo1		95						1																371
FamIncongFirst	8	75	ReverseGo1		95						1																329
FamIncongFirst	8	76	ReverseGo1		95						1																343
FamIncongFirst	8	77	ReverseGo1		95						0																0
FamIncongFirst	8	78	ReverseNoGo1		95												1																0
FamIncongFirst	8	79	ReverseGo1		95						1																318
FamIncongFirst	8	80	ReverseGo1		95						1																356
[truncated: 48,641 more rows]
