# Supplementary material for: Habit Expression and Disruption as a Function of Attention-Deficit/Hyperactivity Disorder Symptomology
Source: Front Psychol. 2019 Sep 3;10:1997. doi: 10.3389/fpsyg.2019.01997 (PMC6733985; doi:10.3389/fpsyg.2019.01997)
Supplement: Supplementary file 1 [file Data_Sheet_1.ZIP › day2merge_full.csv]

ExperimentName	Subject	LogLevel5	Procedure[LogLevel5]	totalpoints	totalpoints2	GoGreen.ACC	GoGreen1.ACC	GoRedRev.ACC	GoRedRev1.ACC	NoGoGreenRev.ACC	NoGoGreenRev1.ACC	NoGoRed.ACC	NoGoRed1.ACC	GoGreen.RT	GoGreen1.RT	GoRedRev.RT	GoRedRev1.RT	NoGoGreenRev.RT	NoGoGreenRev1.RT	NoGoRed.RT	NoGoRed1.RT
Day2_FamFB	1	1	XGo	80	35	1								270
Day2_FamFB	1	2	XGo	80	35	1								296
Day2_FamFB	1	3	XGo	80	35	1								296
Day2_FamFB	1	4	XGo	80	35	1								272
Day2_FamFB	1	5	XGo	80	35	1								338
Day2_FamFB	1	6	XGo	80	35	1								353
Day2_FamFB	1	7	XNoGo	80	35							1								0
Day2_FamFB	1	8	XGo	80	35	1								275
Day2_FamFB	1	9	XGo	80	35	1								307
Day2_FamFB	1	10	XNoGo	80	35							1								0
Day2_FamFB	1	11	XGo	80	35	1								303
Day2_FamFB	1	12	XGo	80	35	1								296
Day2_FamFB	1	13	XGo	80	35	1								312
Day2_FamFB	1	14	XGo	80	35	1								296
Day2_FamFB	1	15	XGo	80	35	1								304
Day2_FamFB	1	16	XNoGo	80	35							0								232
Day2_FamFB	1	17	XGo	80	35	1								282
Day2_FamFB	1	18	XGo	80	35	1								323
Day2_FamFB	1	19	XNoGo	80	35							1								0
Day2_FamFB	1	20	XGo	80	35	1								270
Day2_FamFB	1	21	XGo	80	35	1								288
Day2_FamFB	1	22	XGo	80	35	0								0
Day2_FamFB	1	23	XGo	80	35	1								309
Day2_FamFB	1	24	XGo	80	35	1								300
Day2_FamFB	1	25	XGo	80	35	1								357
Day2_FamFB	1	26	XGo	80	35	1								306
Day2_FamFB	1	27	XGo	80	35	1								314
Day2_FamFB	1	28	XNoGo	80	35							1								0
Day2_FamFB	1	29	XGo	80	35	1								333
Day2_FamFB	1	30	XGo	80	35	0								0
Day2_FamFB	1	31	XGo	80	35	1								296
Day2_FamFB	1	32	XGo	80	35	1								280
Day2_FamFB	1	33	XGo	80	35	1								289
Day2_FamFB	1	34	XGo	80	35	0								0
Day2_FamFB	1	35	XGo	80	35	1								317
Day2_FamFB	1	36	XNoGo	80	35							1								0
Day2_FamFB	1	37	XGo	80	35	1								232
Day2_FamFB	1	38	XNoGo	80	35							0								331
Day2_FamFB	1	39	XGo	80	35	1								370
Day2_FamFB	1	40	XGo	80	35	1								304
Day2_FamFB	1	41	XGo	80	35	1								320
Day2_FamFB	1	42	XGo	80	35	1								302
Day2_FamFB	1	43	XGo	80	35	1								311
Day2_FamFB	1	44	XGo	80	35	1								302
Day2_FamFB	1	45	XGo	80	35	1								335
Day2_FamFB	1	46	XGo	80	35	1								309
Day2_FamFB	1	47	XNoGo	80	35							1								0
Day2_FamFB	1	48	XGo	80	35	1								289
Day2_FamFB	1	49	XGo	80	35	1								354
Day2_FamFB	1	50	XGo	80	35	1								278
Day2_FamFB	1	51	XGo	80	35	1								279
Day2_FamFB	1	52	XGo	80	35	0								0
Day2_FamFB	1	53	XNoGo	80	35							1								0
Day2_FamFB	1	54	XGo	80	35	1								296
Day2_FamFB	1	55	XGo	80	35	1								305
Day2_FamFB	1	56	XGo	80	35	1								273
Day2_FamFB	1	57	XNoGo	80	35							1								0
Day2_FamFB	1	58	XGo	80	35	1								253
Day2_FamFB	1	59	XGo	80	35	1								391
Day2_FamFB	1	60	XGo	80	35	0								0
Day2_FamFB	1	61	XGo	80	35	1								336
Day2_FamFB	1	62	XGo	80	35	1								270
Day2_FamFB	1	63	XNoGo	80	35							1								0
Day2_FamFB	1	64	XGo	80	35	1								324
Day2_FamFB	1	65	XGo	80	35	1								316
Day2_FamFB	1	66	XGo	80	35	1								315
Day2_FamFB	1	67	XGo	80	35	1								250
Day2_FamFB	1	68	XGo	80	35	1								292
Day2_FamFB	1	69	XGo	80	35	1								284
Day2_FamFB	1	70	XNoGo	80	35							1								0
Day2_FamFB	1	71	XGo	80	35	1								329
Day2_FamFB	1	72	XGo	80	35	1								296
Day2_FamFB	1	73	XNoGo	80	35							1								0
Day2_FamFB	1	74	XGo	80	35	1								284
Day2_FamFB	1	75	XGo	80	35	1								316
Day2_FamFB	1	76	XGo	80	35	1								300
Day2_FamFB	1	77	XGo	80	35	1								292
Day2_FamFB	1	78	XGo	80	35	1								300
Day2_FamFB	1	79	XGo	80	35	1								308
Day2_FamFB	1	80	XNoGo	80	35							0								396
Day2_FamFB	1	81	XNoGo	80	35							1								0
Day2_FamFB	1	82	XGo	80	35	1								325
Day2_FamFB	1	83	XGo	80	35	1								308
Day2_FamFB	1	84	XGo	80	35	1								307
Day2_FamFB	1	85	XGo	80	35	1								347
Day2_FamFB	1	86	XGo	80	35	1								338
Day2_FamFB	1	87	XGo	80	35	1								328
Day2_FamFB	1	88	XGo	80	35	1								367
Day2_FamFB	1	89	XGo	80	35	1								284
Day2_FamFB	1	90	XNoGo	80	35							1								0
Day2_FamFB	1	91	XGo	80	35	1								281
Day2_FamFB	1	92	XGo	80	35	1								346
Day2_FamFB	1	93	XGo	80	35	1								319
Day2_FamFB	1	94	XGo	80	35	1								303
Day2_FamFB	1	95	XGo	80	35	1								351
Day2_FamFB	1	96	XGo	80	35	1								301
Day2_FamFB	1	97	XGo	80	35	1								278
Day2_FamFB	1	98	XGo	80	35	1								326
Day2_FamFB	1	99	XNoGo	80	35							0								341
Day2_FamFB	1	100	XGo	80	35	1								267
Day2_FamFB	1	101	XGo	80	35	1								373
Day2_FamFB	1	102	XNoGo	80	35							1								0
Day2_FamFB	1	103	XGo	80	35	0								0
Day2_FamFB	1	104	XGo	80	35	1								282
Day2_FamFB	1	105	XGo	80	35	1								347
Day2_FamFB	1	106	XGo	80	35	1								322
Day2_FamFB	1	107	XGo	80	35	1								281
Day2_FamFB	1	108	XGo	80	35	1								297
Day2_FamFB	1	109	XGo	80	35	1								345
Day2_FamFB	1	110	XGo	80	35	1								383
Day2_FamFB	1	111	XNoGo	80	35							1								0
Day2_FamFB	1	112	XGo	80	35	1								272
Day2_FamFB	1	113	XGo	80	35	1								306
Day2_FamFB	1	114	XGo	80	35	1								338
Day2_FamFB	1	115	XGo	80	35	1								313
Day2_FamFB	1	116	XGo	80	35	0								0
Day2_FamFB	1	117	XGo	80	35	0								0
Day2_FamFB	1	118	XNoGo	80	35							1								0
Day2_FamFB	1	119	XGo	80	35	1								276
Day2_FamFB	1	120	XGo	80	35	1								284
Day2_FamFB	1	1	ReverseGo	80	35			0								0
Day2_FamFB	1	2	ReverseGo	80	35			1								318
Day2_FamFB	1	3	ReverseNoGo	80	35					1								0
Day2_FamFB	1	4	ReverseGo	80	35			0								0
Day2_FamFB	1	5	ReverseGo	80	35			1								373
Day2_FamFB	1	6	ReverseGo	80	35			1								315
Day2_FamFB	1	7	ReverseGo	80	35			1								283
Day2_FamFB	1	8	ReverseGo	80	35			1								267
Day2_FamFB	1	9	ReverseNoGo	80	35					0								365
Day2_FamFB	1	10	ReverseNoGo	80	35					1								0
Day2_FamFB	1	11	ReverseGo	80	35			1								350
Day2_FamFB	1	12	ReverseGo	80	35			1								316
Day2_FamFB	1	13	ReverseGo	80	35			1								283
Day2_FamFB	1	14	ReverseGo	80	35			1								387
Day2_FamFB	1	15	ReverseGo	80	35			0								0
Day2_FamFB	1	16	ReverseGo	80	35			1								277
Day2_FamFB	1	17	ReverseGo	80	35			1								350
Day2_FamFB	1	18	ReverseGo	80	35			1								268
Day2_FamFB	1	19	ReverseGo	80	35			1								300
Day2_FamFB	1	20	ReverseNoGo	80	35					1								0
Day2_FamFB	1	21	ReverseGo	80	35			1								264
Day2_FamFB	1	22	ReverseGo	80	35			0								0
Day2_FamFB	1	23	ReverseGo	80	35			1								246
Day2_FamFB	1	24	ReverseNoGo	80	35					1								0
Day2_FamFB	1	25	ReverseGo	80	35			1								253
Day2_FamFB	1	26	ReverseGo	80	35			1								302
Day2_FamFB	1	27	ReverseGo	80	35			1								341
Day2_FamFB	1	28	ReverseGo	80	35			0								0
Day2_FamFB	1	29	ReverseNoGo	80	35					0								304
Day2_FamFB	1	30	ReverseGo	80	35			1								344
Day2_FamFB	1	31	ReverseGo	80	35			1								286
Day2_FamFB	1	32	ReverseNoGo	80	35					1								0
Day2_FamFB	1	33	ReverseGo	80	35			1								307
Day2_FamFB	1	34	ReverseGo	80	35			0								0
Day2_FamFB	1	35	ReverseGo	80	35			0								0
Day2_FamFB	1	36	ReverseGo	80	35			1								321
Day2_FamFB	1	37	ReverseGo	80	35			1								272
Day2_FamFB	1	38	ReverseGo	80	35			1								265
Day2_FamFB	1	39	ReverseGo	80	35			1								355
Day2_FamFB	1	40	ReverseGo	80	35			1								273
Day2_FamFB	1	41	ReverseGo	80	35			1								322
Day2_FamFB	1	42	ReverseGo	80	35			1								273
Day2_FamFB	1	43	ReverseGo	80	35			1								274
Day2_FamFB	1	44	ReverseNoGo	80	35					0								298
Day2_FamFB	1	45	ReverseGo	80	35			1								243
Day2_FamFB	1	46	ReverseGo	80	35			1								277
Day2_FamFB	1	47	ReverseGo	80	35			1								286
Day2_FamFB	1	48	ReverseGo	80	35			1								327
Day2_FamFB	1	49	ReverseGo	80	35			1								277
Day2_FamFB	1	50	ReverseGo	80	35			1								343
Day2_FamFB	1	51	ReverseNoGo	80	35					0								260
Day2_FamFB	1	52	ReverseGo	80	35			1								334
Day2_FamFB	1	53	ReverseGo	80	35			1								292
Day2_FamFB	1	54	ReverseGo	80	35			1								267
Day2_FamFB	1	55	ReverseNoGo	80	35					0								293
Day2_FamFB	1	56	ReverseGo	80	35			1								342
Day2_FamFB	1	57	ReverseNoGo	80	35					1								0
Day2_FamFB	1	58	ReverseGo	80	35			1								313
Day2_FamFB	1	59	ReverseGo	80	35			0								0
Day2_FamFB	1	60	ReverseGo	80	35			1								324
Day2_FamFB	1	61	ReverseGo	80	35			1								290
Day2_FamFB	1	62	ReverseGo	80	35			1								307
Day2_FamFB	1	63	ReverseGo	80	35			1								243
Day2_FamFB	1	64	ReverseGo	80	35			1								285
Day2_FamFB	1	65	ReverseNoGo	80	35					1								0
Day2_FamFB	1	66	ReverseGo	80	35			1								362
Day2_FamFB	1	67	ReverseGo	80	35			1								295
Day2_FamFB	1	68	ReverseGo	80	35			1								336
Day2_FamFB	1	69	ReverseGo	80	35			1								269
Day2_FamFB	1	70	ReverseGo	80	35			1								279
Day2_FamFB	1	71	ReverseGo	80	35			1								240
Day2_FamFB	1	72	ReverseNoGo	80	35					0								275
Day2_FamFB	1	73	ReverseGo	80	35			1								324
Day2_FamFB	1	74	ReverseGo	80	35			1								268
Day2_FamFB	1	75	ReverseGo	80	35			1								349
Day2_FamFB	1	76	ReverseGo	80	35			0								0
Day2_FamFB	1	77	ReverseGo	80	35			0								0
Day2_FamFB	1	78	ReverseGo	80	35			1								266
Day2_FamFB	1	79	ReverseGo	80	35			1								276
Day2_FamFB	1	80	ReverseNoGo	80	35					0								309
Day2_FamFB	1	81	ReverseNoGo	80	35					0								237
Day2_FamFB	1	82	ReverseGo	80	35			1								288
Day2_FamFB	1	83	ReverseGo	80	35			1								249
Day2_FamFB	1	84	ReverseGo	80	35			1								291
Day2_FamFB	1	85	ReverseGo	80	35			1								284
Day2_FamFB	1	86	ReverseGo	80	35			1								284
Day2_FamFB	1	87	ReverseGo	80	35			0								0
Day2_FamFB	1	88	ReverseNoGo	80	35					0								344
Day2_FamFB	1	89	ReverseGo	80	35			0								0
Day2_FamFB	1	90	ReverseGo	80	35			1								267
Day2_FamFB	1	91	ReverseGo	80	35			1								268
Day2_FamFB	1	92	ReverseGo	80	35			1								278
Day2_FamFB	1	93	ReverseGo	80	35			1								335
Day2_FamFB	1	94	ReverseGo	80	35			1								278
Day2_FamFB	1	95	ReverseGo	80	35			1								229
Day2_FamFB	1	96	ReverseGo	80	35			1								264
Day2_FamFB	1	97	ReverseGo	80	35			1								257
Day2_FamFB	1	98	ReverseNoGo	80	35					0								388
Day2_FamFB	1	99	ReverseGo	80	35			1								377
Day2_FamFB	1	100	ReverseGo	80	35			1								269
Day2_FamFB	1	101	ReverseGo	80	35			1								295
Day2_FamFB	1	102	ReverseGo	80	35			1								296
Day2_FamFB	1	103	ReverseGo	80	35			1								271
Day2_FamFB	1	104	ReverseGo	80	35			1								328
Day2_FamFB	1	105	ReverseGo	80	35			1								239
Day2_FamFB	1	106	ReverseGo	80	35			1								249
Day2_FamFB	1	107	ReverseNoGo	80	35					0								259
Day2_FamFB	1	108	ReverseGo	80	35			1								285
Day2_FamFB	1	109	ReverseGo	80	35			1								318
Day2_FamFB	1	110	ReverseGo	80	35			1								350
Day2_FamFB	1	111	ReverseNoGo	80	35					0								275
Day2_FamFB	1	112	ReverseGo	80	35			1								307
Day2_FamFB	1	113	ReverseGo	80	35			1								388
Day2_FamFB	1	114	ReverseGo	80	35			1								296
Day2_FamFB	1	115	ReverseGo	80	35			1								345
Day2_FamFB	1	116	ReverseGo	80	35			1								311
Day2_FamFB	1	117	ReverseGo	80	35			1								382
Day2_FamFB	1	118	ReverseNoGo	80	35					0								283
Day2_FamFB	1	119	ReverseGo	80	35			1								258
Day2_FamFB	1	120	ReverseGo	80	35			1								372
Day2_FamFB	2	1	XGo1	90	85		1								262
Day2_FamFB	2	2	XGo1	90	85		1								255
Day2_FamFB	2	3	XGo1	90	85		1								256
Day2_FamFB	2	4	XGo1	90	85		1								283
Day2_FamFB	2	5	XGo1	90	85		1								300
Day2_FamFB	2	6	XNoGo1	90	85								0								275
Day2_FamFB	2	7	XNoGo1	90	85								1								0
Day2_FamFB	2	8	XGo1	90	85		1								321
Day2_FamFB	2	9	XGo1	90	85		1								272
Day2_FamFB	2	10	XGo1	90	85		1								266
Day2_FamFB	2	11	XGo1	90	85		1								315
Day2_FamFB	2	12	XNoGo1	90	85								1								0
Day2_FamFB	2	13	XGo1	90	85		1								262
Day2_FamFB	2	14	XGo1	90	85		1								288
Day2_FamFB	2	15	XNoGo1	90	85								1								0
Day2_FamFB	2	16	XGo1	90	85		1								260
Day2_FamFB	2	17	XGo1	90	85		1								278
Day2_FamFB	2	18	XGo1	90	85		1								287
Day2_FamFB	2	19	XGo1	90	85		1								288
Day2_FamFB	2	20	XGo1	90	85		1								304
Day2_FamFB	2	21	XGo1	90	85		1								288
Day2_FamFB	2	22	XGo1	90	85		1								329
Day2_FamFB	2	23	XNoGo1	90	85								1								0
Day2_FamFB	2	24	XGo1	90	85		0								0
Day2_FamFB	2	25	XGo1	90	85		1								295
Day2_FamFB	2	26	XNoGo1	90	85								1								0
Day2_FamFB	2	27	XNoGo1	90	85								0								292
Day2_FamFB	2	28	XGo1	90	85		1								332
Day2_FamFB	2	29	XGo1	90	85		1								346
Day2_FamFB	2	30	XGo1	90	85		1								321
Day2_FamFB	2	31	XGo1	90	85		1								296
Day2_FamFB	2	32	XNoGo1	90	85								1								0
Day2_FamFB	2	33	XGo1	90	85		1								277
Day2_FamFB	2	34	XGo1	90	85		1								294
Day2_FamFB	2	35	XGo1	90	85		1								294
Day2_FamFB	2	36	XGo1	90	85		1								286
Day2_FamFB	2	37	XNoGo1	90	85								1								0
Day2_FamFB	2	38	XGo1	90	85		1								298
Day2_FamFB	2	39	XGo1	90	85		1								322
Day2_FamFB	2	40	XGo1	90	85		1								297
Day2_FamFB	2	41	XNoGo1	90	85								1								0
Day2_FamFB	2	42	XGo1	90	85		1								318
Day2_FamFB	2	43	XGo1	90	85		1								325
Day2_FamFB	2	44	XGo1	90	85		1								284
Day2_FamFB	2	45	XGo1	90	85		1								277
Day2_FamFB	2	46	XGo1	90	85		1								269
Day2_FamFB	2	47	XGo1	90	85		1								303
Day2_FamFB	2	48	XGo1	90	85		1								271
Day2_FamFB	2	49	XNoGo1	90	85								1								0
Day2_FamFB	2	50	XGo1	90	85		1								316
Day2_FamFB	2	51	XGo1	90	85		1								308
Day2_FamFB	2	52	XGo1	90	85		1								348
Day2_FamFB	2	53	XGo1	90	85		1								289
Day2_FamFB	2	54	XGo1	90	85		1								282
Day2_FamFB	2	55	XGo1	90	85		1								267
Day2_FamFB	2	56	XGo1	90	85		1								285
Day2_FamFB	2	57	XGo1	90	85		1								286
Day2_FamFB	2	58	XGo1	90	85		1								310
Day2_FamFB	2	59	XGo1	90	85		1								278
Day2_FamFB	2	60	XGo1	90	85		1								295
Day2_FamFB	2	61	XGo1	90	85		1								319
Day2_FamFB	2	62	XGo1	90	85		1								293
Day2_FamFB	2	63	XGo1	90	85		1								277
Day2_FamFB	2	64	XNoGo1	90	85								1								0
Day2_FamFB	2	65	XGo1	90	85		1								282
Day2_FamFB	2	66	XGo1	90	85		1								347
Day2_FamFB	2	67	XNoGo1	90	85								1								0
Day2_FamFB	2	68	XGo1	90	85		1								302
Day2_FamFB	2	69	XGo1	90	85		1								318
Day2_FamFB	2	70	XGo1	90	85		1								308
Day2_FamFB	2	71	XGo1	90	85		1								332
Day2_FamFB	2	72	XGo1	90	85		1								331
Day2_FamFB	2	73	XGo1	90	85		1								290
Day2_FamFB	2	74	XGo1	90	85		1								282
Day2_FamFB	2	75	XGo1	90	85		1								291
Day2_FamFB	2	76	XGo1	90	85		1								276
Day2_FamFB	2	77	XNoGo1	90	85								1								0
Day2_FamFB	2	78	XGo1	90	85		1								360
Day2_FamFB	2	79	XGo1	90	85		1								333
Day2_FamFB	2	80	XGo1	90	85		1								324
Day2_FamFB	2	81	XGo1	90	85		1								315
Day2_FamFB	2	82	XGo1	90	85		1								267
Day2_FamFB	2	83	XGo1	90	85		1								292
Day2_FamFB	2	84	XGo1	90	85		1								293
Day2_FamFB	2	85	XGo1	90	85		1								309
Day2_FamFB	2	86	XGo1	90	85		1								268
Day2_FamFB	2	87	XNoGo1	90	85								1								0
Day2_FamFB	2	88	XGo1	90	85		1								313
Day2_FamFB	2	89	XGo1	90	85		1								272
Day2_FamFB	2	90	XGo1	90	85		1								298
Day2_FamFB	2	91	XGo1	90	85		1								306
Day2_FamFB	2	92	XNoGo1	90	85								1								0
Day2_FamFB	2	93	XGo1	90	85		1								294
Day2_FamFB	2	94	XGo1	90	85		1								278
Day2_FamFB	2	95	XGo1	90	85		1								294
Day2_FamFB	2	96	XNoGo1	90	85								1								0
Day2_FamFB	2	97	XGo1	90	85		1								291
Day2_FamFB	2	98	XGo1	90	85		1								315
Day2_FamFB	2	99	XGo1	90	85		1								331
Day2_FamFB	2	100	XGo1	90	85		1								314
Day2_FamFB	2	101	XGo1	90	85		1								273
Day2_FamFB	2	102	XGo1	90	85		1								307
Day2_FamFB	2	103	XGo1	90	85		1								284
Day2_FamFB	2	104	XGo1	90	85		1								291
Day2_FamFB	2	105	XGo1	90	85		1								340
Day2_FamFB	2	106	XNoGo1	90	85								1								0
Day2_FamFB	2	107	XGo1	90	85		1								287
Day2_FamFB	2	108	XGo1	90	85		1								312
Day2_FamFB	2	109	XGo1	90	85		1								279
Day2_FamFB	2	110	XGo1	90	85		1								312
Day2_FamFB	2	111	XGo1	90	85		1								288
Day2_FamFB	2	112	XNoGo1	90	85								1								0
Day2_FamFB	2	113	XGo1	90	85		1								332
Day2_FamFB	2	114	XGo1	90	85		0								0
Day2_FamFB	2	115	XNoGo1	90	85								1								0
Day2_FamFB	2	116	XGo1	90	85		1								331
Day2_FamFB	2	117	XGo1	90	85		1								361
Day2_FamFB	2	118	XGo1	90	85		1								359
Day2_FamFB	2	119	XGo1	90	85		1								317
Day2_FamFB	2	120	XGo1	90	85		1								307
Day2_FamFB	2	1	ReverseGo1	90	85				1								246
Day2_FamFB	2	2	ReverseGo1	90	85				1								257
Day2_FamFB	2	3	ReverseGo1	90	85				1								267
Day2_FamFB	2	4	ReverseGo1	90	85				1								284
Day2_FamFB	2	5	ReverseGo1	90	85				1								277
Day2_FamFB	2	6	ReverseGo1	90	85				1								246
Day2_FamFB	2	7	ReverseGo1	90	85				1								256
Day2_FamFB	2	8	ReverseNoGo1	90	85						0								258
Day2_FamFB	2	9	ReverseGo1	90	85				1								332
Day2_FamFB	2	10	ReverseNoGo1	90	85						1								0
Day2_FamFB	2	11	ReverseGo1	90	85				1								278
Day2_FamFB	2	12	ReverseGo1	90	85				1								295
Day2_FamFB	2	13	ReverseGo1	90	85				1								311
Day2_FamFB	2	14	ReverseGo1	90	85				1								383
Day2_FamFB	2	15	ReverseGo1	90	85				1								308
Day2_FamFB	2	16	ReverseGo1	90	85				1								316
Day2_FamFB	2	17	ReverseNoGo1	90	85						0								299
Day2_FamFB	2	18	ReverseNoGo1	90	85						1								0
Day2_FamFB	2	19	ReverseGo1	90	85				1								286
Day2_FamFB	2	20	ReverseGo1	90	85				1								351
Day2_FamFB	2	21	ReverseGo1	90	85				1								253
Day2_FamFB	2	22	ReverseGo1	90	85				1								336
Day2_FamFB	2	23	ReverseGo1	90	85				1								294
Day2_FamFB	2	24	ReverseNoGo1	90	85						1								0
Day2_FamFB	2	25	ReverseGo1	90	85				1								299
Day2_FamFB	2	26	ReverseGo1	90	85				1								266
Day2_FamFB	2	27	ReverseGo1	90	85				1								292
Day2_FamFB	2	28	ReverseGo1	90	85				1								340
Day2_FamFB	2	29	ReverseNoGo1	90	85						1								0
Day2_FamFB	2	30	ReverseGo1	90	85				1								278
Day2_FamFB	2	31	ReverseGo1	90	85				1								288
Day2_FamFB	2	32	ReverseGo1	90	85				1								288
Day2_FamFB	2	33	ReverseGo1	90	85				1								306
Day2_FamFB	2	34	ReverseGo1	90	85				1								274
Day2_FamFB	2	35	ReverseGo1	90	85				1								314
Day2_FamFB	2	36	ReverseNoGo1	90	85						1								0
Day2_FamFB	2	37	ReverseGo1	90	85				1								269
Day2_FamFB	2	38	ReverseGo1	90	85				1								311
Day2_FamFB	2	39	ReverseGo1	90	85				1								319
Day2_FamFB	2	40	ReverseGo1	90	85				1								294
Day2_FamFB	2	41	ReverseNoGo1	90	85						1								0
Day2_FamFB	2	42	ReverseGo1	90	85				1								315
Day2_FamFB	2	43	ReverseGo1	90	85				1								305
Day2_FamFB	2	44	ReverseGo1	90	85				1								329
Day2_FamFB	2	45	ReverseGo1	90	85				1								272
Day2_FamFB	2	46	ReverseGo1	90	85				1								298
Day2_FamFB	2	47	ReverseGo1	90	85				1								314
Day2_FamFB	2	48	ReverseNoGo1	90	85						1								0
Day2_FamFB	2	49	ReverseGo1	90	85				1								270
Day2_FamFB	2	50	ReverseGo1	90	85				1								303
Day2_FamFB	2	51	ReverseGo1	90	85				1								302
Day2_FamFB	2	52	ReverseGo1	90	85				1								310
Day2_FamFB	2	53	ReverseGo1	90	85				1								277
Day2_FamFB	2	54	ReverseGo1	90	85				1								294
Day2_FamFB	2	55	ReverseGo1	90	85				1								326
Day2_FamFB	2	56	ReverseNoGo1	90	85						0								317
Day2_FamFB	2	57	ReverseGo1	90	85				1								268
Day2_FamFB	2	58	ReverseGo1	90	85				1								294
Day2_FamFB	2	59	ReverseNoGo1	90	85						1								0
Day2_FamFB	2	60	ReverseGo1	90	85				1								274
Day2_FamFB	2	61	ReverseGo1	90	85				1								332
Day2_FamFB	2	62	ReverseGo1	90	85				1								346
Day2_FamFB	2	63	ReverseGo1	90	85				1								312
Day2_FamFB	2	64	ReverseGo1	90	85				1								376
Day2_FamFB	2	65	ReverseGo1	90	85				1								268
Day2_FamFB	2	66	ReverseGo1	90	85				1								301
Day2_FamFB	2	67	ReverseNoGo1	90	85						1								0
Day2_FamFB	2	68	ReverseGo1	90	85				1								305
Day2_FamFB	2	69	ReverseGo1	90	85				1								321
Day2_FamFB	2	70	ReverseGo1	90	85				1								312
Day2_FamFB	2	71	ReverseGo1	90	85				1								271
Day2_FamFB	2	72	ReverseNoGo1	90	85						1								0
Day2_FamFB	2	73	ReverseGo1	90	85				1								301
Day2_FamFB	2	74	ReverseGo1	90	85				1								277
Day2_FamFB	2	75	ReverseGo1	90	85				1								351
Day2_FamFB	2	76	ReverseGo1	90	85				1								324
Day2_FamFB	2	77	ReverseNoGo1	90	85						1								0
Day2_FamFB	2	78	ReverseGo1	90	85				1								319
Day2_FamFB	2	79	ReverseGo1	90	85				1								326
Day2_FamFB	2	80	ReverseGo1	90	85				1								285
Day2_FamFB	2	81	ReverseGo1	90	85				1								295
Day2_FamFB	2	82	ReverseGo1	90	85				1								295
Day2_FamFB	2	83	ReverseGo1	90	85				1								391
Day2_FamFB	2	84	ReverseGo1	90	85				1								339
Day2_FamFB	2	85	ReverseGo1	90	85				1								313
Day2_FamFB	2	86	ReverseGo1	90	85				1								288
Day2_FamFB	2	87	ReverseNoGo1	90	85						1								0
Day2_FamFB	2	88	ReverseGo1	90	85				1								294
Day2_FamFB	2	89	ReverseGo1	90	85				1								350
Day2_FamFB	2	90	ReverseGo1	90	85				1								299
Day2_FamFB	2	91	ReverseGo1	90	85				1								300
Day2_FamFB	2	92	ReverseGo1	90	85				1								283
Day2_FamFB	2	93	ReverseGo1	90	85				1								260
Day2_FamFB	2	94	ReverseNoGo1	90	85						1								0
Day2_FamFB	2	95	ReverseNoGo1	90	85						1								0
Day2_FamFB	2	96	ReverseGo1	90	85				1								334
Day2_FamFB	2	97	ReverseGo1	90	85				1								284
Day2_FamFB	2	98	ReverseGo1	90	85				1								309
Day2_FamFB	2	99	ReverseGo1	90	85				1								317
Day2_FamFB	2	100	ReverseGo1	90	85				1								301
Day2_FamFB	2	101	ReverseGo1	90	85				1								307
Day2_FamFB	2	102	ReverseNoGo1	90	85						1								0
Day2_FamFB	2	103	ReverseGo1	90	85				1								296
Day2_FamFB	2	104	ReverseGo1	90	85				0								0
Day2_FamFB	2	105	ReverseGo1	90	85				1								276
Day2_FamFB	2	106	ReverseGo1	90	85				1								333
Day2_FamFB	2	107	ReverseGo1	90	85				1								324
Day2_FamFB	2	108	ReverseGo1	90	85				1								299
Day2_FamFB	2	109	ReverseNoGo1	90	85						1								0
Day2_FamFB	2	110	ReverseGo1	90	85				1								319
Day2_FamFB	2	111	ReverseGo1	90	85				1								278
Day2_FamFB	2	112	ReverseGo1	90	85				1								279
Day2_FamFB	2	113	ReverseGo1	90	85				1								312
Day2_FamFB	2	114	ReverseGo1	90	85				1								343
Day2_FamFB	2	115	ReverseGo1	90	85				1								269
Day2_FamFB	2	116	ReverseGo1	90	85				1								279
Day2_FamFB	2	117	ReverseGo1	90	85				1								296
Day2_FamFB	2	118	ReverseGo1	90	85				1								247
Day2_FamFB	2	119	ReverseNoGo1	90	85						1								0
Day2_FamFB	2	120	ReverseGo1	90	85				1								301
Day2_FamFB	3	1	XGo	55	70	1								281
Day2_FamFB	3	2	XGo	55	70	1								305
Day2_FamFB	3	3	XGo	55	70	1								257
Day2_FamFB	3	4	XGo	55	70	1								267
Day2_FamFB	3	5	XGo	55	70	1								253
Day2_FamFB	3	6	XGo	55	70	1								295
Day2_FamFB	3	7	XNoGo	55	70							1								0
Day2_FamFB	3	8	XGo	55	70	1								243
Day2_FamFB	3	9	XGo	55	70	1								237
Day2_FamFB	3	10	XNoGo	55	70							0								257
Day2_FamFB	3	11	XGo	55	70	1								306
Day2_FamFB	3	12	XGo	55	70	1								297
Day2_FamFB	3	13	XGo	55	70	1								322
Day2_FamFB	3	14	XGo	55	70	1								225
Day2_FamFB	3	15	XGo	55	70	1								333
Day2_FamFB	3	16	XNoGo	55	70							1								0
Day2_FamFB	3	17	XGo	55	70	1								328
Day2_FamFB	3	18	XGo	55	70	1								295
Day2_FamFB	3	19	XNoGo	55	70							1								0
Day2_FamFB	3	20	XGo	55	70	1								274
Day2_FamFB	3	21	XGo	55	70	1								314
Day2_FamFB	3	22	XGo	55	70	1								282
Day2_FamFB	3	23	XGo	55	70	1								307
Day2_FamFB	3	24	XGo	55	70	1								331
Day2_FamFB	3	25	XGo	55	70	1								274
Day2_FamFB	3	26	XGo	55	70	0								0
Day2_FamFB	3	27	XGo	55	70	1								232
Day2_FamFB	3	28	XNoGo	55	70							0								257
Day2_FamFB	3	29	XGo	55	70	1								244
Day2_FamFB	3	30	XGo	55	70	1								262
Day2_FamFB	3	31	XGo	55	70	1								224
Day2_FamFB	3	32	XGo	55	70	1								307
Day2_FamFB	3	33	XGo	55	70	1								243
Day2_FamFB	3	34	XGo	55	70	1								317
Day2_FamFB	3	35	XGo	55	70	1								261
Day2_FamFB	3	36	XNoGo	55	70							1								0
Day2_FamFB	3	37	XGo	55	70	1								338
Day2_FamFB	3	38	XNoGo	55	70							1								0
Day2_FamFB	3	39	XGo	55	70	1								284
Day2_FamFB	3	40	XGo	55	70	1								277
Day2_FamFB	3	41	XGo	55	70	1								254
Day2_FamFB	3	42	XGo	55	70	1								272
Day2_FamFB	3	43	XGo	55	70	1								337
Day2_FamFB	3	44	XGo	55	70	1								256
Day2_FamFB	3	45	XGo	55	70	1								330
Day2_FamFB	3	46	XGo	55	70	1								320
Day2_FamFB	3	47	XNoGo	55	70							0								256
Day2_FamFB	3	48	XGo	55	70	1								314
Day2_FamFB	3	49	XGo	55	70	1								305
Day2_FamFB	3	50	XGo	55	70	1								346
Day2_FamFB	3	51	XGo	55	70	1								328
Day2_FamFB	3	52	XGo	55	70	1								359
Day2_FamFB	3	53	XNoGo	55	70							0								227
Day2_FamFB	3	54	XGo	55	70	1								366
Day2_FamFB	3	55	XGo	55	70	1								267
Day2_FamFB	3	56	XGo	55	70	1								293
Day2_FamFB	3	57	XNoGo	55	70							0								261
Day2_FamFB	3	58	XGo	55	70	1								262
Day2_FamFB	3	59	XGo	55	70	1								352
Day2_FamFB	3	60	XGo	55	70	1								287
Day2_FamFB	3	61	XGo	55	70	1								342
Day2_FamFB	3	62	XGo	55	70	1								324
Day2_FamFB	3	63	XNoGo	55	70							1								0
Day2_FamFB	3	64	XGo	55	70	1								296
Day2_FamFB	3	65	XGo	55	70	1								264
Day2_FamFB	3	66	XGo	55	70	1								282
Day2_FamFB	3	67	XGo	55	70	1								331
Day2_FamFB	3	68	XGo	55	70	1								338
Day2_FamFB	3	69	XGo	55	70	1								255
Day2_FamFB	3	70	XNoGo	55	70							1								0
Day2_FamFB	3	71	XGo	55	70	1								230
Day2_FamFB	3	72	XGo	55	70	1								265
Day2_FamFB	3	73	XNoGo	55	70							0								267
Day2_FamFB	3	74	XGo	55	70	1								324
Day2_FamFB	3	75	XGo	55	70	1								251
Day2_FamFB	3	76	XGo	55	70	1								277
Day2_FamFB	3	77	XGo	55	70	1								246
Day2_FamFB	3	78	XGo	55	70	1								255
Day2_FamFB	3	79	XGo	55	70	1								266
Day2_FamFB	3	80	XNoGo	55	70							0								259
Day2_FamFB	3	81	XNoGo	55	70							1								0
Day2_FamFB	3	82	XGo	55	70	1								361
Day2_FamFB	3	83	XGo	55	70	1								286
Day2_FamFB	3	84	XGo	55	70	1								303
Day2_FamFB	3	85	XGo	55	70	1								287
Day2_FamFB	3	86	XGo	55	70	1								271
Day2_FamFB	3	87	XGo	55	70	1								297
Day2_FamFB	3	88	XGo	55	70	1								249
Day2_FamFB	3	89	XGo	55	70	1								324
Day2_FamFB	3	90	XNoGo	55	70							1								0
Day2_FamFB	3	91	XGo	55	70	1								247
Day2_FamFB	3	92	XGo	55	70	1								281
Day2_FamFB	3	93	XGo	55	70	1								330
Day2_FamFB	3	94	XGo	55	70	1								289
Day2_FamFB	3	95	XGo	55	70	1								305
Day2_FamFB	3	96	XGo	55	70	1								321
Day2_FamFB	3	97	XGo	55	70	1								224
Day2_FamFB	3	98	XGo	55	70	1								315
Day2_FamFB	3	99	XNoGo	55	70							0								275
Day2_FamFB	3	100	XGo	55	70	1								379
Day2_FamFB	3	101	XGo	55	70	1								224
Day2_FamFB	3	102	XNoGo	55	70							1								0
Day2_FamFB	3	103	XGo	55	70	1								231
Day2_FamFB	3	104	XGo	55	70	1								314
Day2_FamFB	3	105	XGo	55	70	1								265
Day2_FamFB	3	106	XGo	55	70	1								307
Day2_FamFB	3	107	XGo	55	70	1								323
Day2_FamFB	3	108	XGo	55	70	1								290
Day2_FamFB	3	109	XGo	55	70	1								252
Day2_FamFB	3	110	XGo	55	70	1								309
Day2_FamFB	3	111	XNoGo	55	70							0								293
Day2_FamFB	3	112	XGo	55	70	1								236
Day2_FamFB	3	113	XGo	55	70	1								303
Day2_FamFB	3	114	XGo	55	70	1								271
Day2_FamFB	3	115	XGo	55	70	1								345
Day2_FamFB	3	116	XGo	55	70	1								279
Day2_FamFB	3	117	XGo	55	70	1								271
Day2_FamFB	3	118	XNoGo	55	70							1								0
Day2_FamFB	3	119	XGo	55	70	1								229
Day2_FamFB	3	120	XGo	55	70	1								223
Day2_FamFB	3	1	ReverseGo	55	70			1								241
Day2_FamFB	3	2	ReverseGo	55	70			1								227
Day2_FamFB	3	3	ReverseNoGo	55	70					1								0
Day2_FamFB	3	4	ReverseGo	55	70			1								226
Day2_FamFB	3	5	ReverseGo	55	70			1								269
Day2_FamFB	3	6	ReverseGo	55	70			1								303
Day2_FamFB	3	7	ReverseGo	55	70			1								327
Day2_FamFB	3	8	ReverseGo	55	70			1								334
Day2_FamFB	3	9	ReverseNoGo	55	70					1								0
Day2_FamFB	3	10	ReverseNoGo	55	70					1								0
Day2_FamFB	3	11	ReverseGo	55	70			1								291
Day2_FamFB	3	12	ReverseGo	55	70			1								301
Day2_FamFB	3	13	ReverseGo	55	70			0								0
Day2_FamFB	3	14	ReverseGo	55	70			1								369
Day2_FamFB	3	15	ReverseGo	55	70			1								375
Day2_FamFB	3	16	ReverseGo	55	70			1								300
Day2_FamFB	3	17	ReverseGo	55	70			1								340
Day2_FamFB	3	18	ReverseGo	55	70			1								322
Day2_FamFB	3	19	ReverseGo	55	70			1								257
Day2_FamFB	3	20	ReverseNoGo	55	70					0								228
Day2_FamFB	3	21	ReverseGo	55	70			1								350
Day2_FamFB	3	22	ReverseGo	55	70			1								236
Day2_FamFB	3	23	ReverseGo	55	70			1								239
Day2_FamFB	3	24	ReverseNoGo	55	70					1								0
Day2_FamFB	3	25	ReverseGo	55	70			1								230
Day2_FamFB	3	26	ReverseGo	55	70			1								249
Day2_FamFB	3	27	ReverseGo	55	70			1								274
Day2_FamFB	3	28	ReverseGo	55	70			1								260
Day2_FamFB	3	29	ReverseNoGo	55	70					1								0
Day2_FamFB	3	30	ReverseGo	55	70			1								234
Day2_FamFB	3	31	ReverseGo	55	70			1								253
Day2_FamFB	3	32	ReverseNoGo	55	70					1								0
Day2_FamFB	3	33	ReverseGo	55	70			1								291
Day2_FamFB	3	34	ReverseGo	55	70			1								292
Day2_FamFB	3	35	ReverseGo	55	70			0								0
Day2_FamFB	3	36	ReverseGo	55	70			1								280
Day2_FamFB	3	37	ReverseGo	55	70			1								329
Day2_FamFB	3	38	ReverseGo	55	70			1								264
Day2_FamFB	3	39	ReverseGo	55	70			1								329
Day2_FamFB	3	40	ReverseGo	55	70			1								320
Day2_FamFB	3	41	ReverseGo	55	70			1								263
Day2_FamFB	3	42	ReverseGo	55	70			1								313
Day2_FamFB	3	43	ReverseGo	55	70			0								0
Day2_FamFB	3	44	ReverseNoGo	55	70					0								355
Day2_FamFB	3	45	ReverseGo	55	70			1								322
Day2_FamFB	3	46	ReverseGo	55	70			1								249
Day2_FamFB	3	47	ReverseGo	55	70			1								275
Day2_FamFB	3	48	ReverseGo	55	70			1								340
Day2_FamFB	3	49	ReverseGo	55	70			1								299
Day2_FamFB	3	50	ReverseGo	55	70			1								234
Day2_FamFB	3	51	ReverseNoGo	55	70					1								0
Day2_FamFB	3	52	ReverseGo	55	70			1								345
Day2_FamFB	3	53	ReverseGo	55	70			1								311
Day2_FamFB	3	54	ReverseGo	55	70			1								279
Day2_FamFB	3	55	ReverseNoGo	55	70					1								0
Day2_FamFB	3	56	ReverseGo	55	70			0								0
Day2_FamFB	3	57	ReverseNoGo	55	70					0								216
Day2_FamFB	3	58	ReverseGo	55	70			1								356
Day2_FamFB	3	59	ReverseGo	55	70			1								234
Day2_FamFB	3	60	ReverseGo	55	70			1								252
Day2_FamFB	3	61	ReverseGo	55	70			1								238
Day2_FamFB	3	62	ReverseGo	55	70			1								257
Day2_FamFB	3	63	ReverseGo	55	70			1								259
Day2_FamFB	3	64	ReverseGo	55	70			1								396
Day2_FamFB	3	65	ReverseNoGo	55	70					1								0
Day2_FamFB	3	66	ReverseGo	55	70			1								308
Day2_FamFB	3	67	ReverseGo	55	70			1								268
Day2_FamFB	3	68	ReverseGo	55	70			1								326
Day2_FamFB	3	69	ReverseGo	55	70			1								292
Day2_FamFB	3	70	ReverseGo	55	70			1								260
Day2_FamFB	3	71	ReverseGo	55	70			1								310
Day2_FamFB	3	72	ReverseNoGo	55	70					1								0
Day2_FamFB	3	73	ReverseGo	55	70			1								241
Day2_FamFB	3	74	ReverseGo	55	70			0								0
Day2_FamFB	3	75	ReverseGo	55	70			1								352
Day2_FamFB	3	76	ReverseGo	55	70			1								318
Day2_FamFB	3	77	ReverseGo	55	70			1								326
Day2_FamFB	3	78	ReverseGo	55	70			1								260
Day2_FamFB	3	79	ReverseGo	55	70			1								293
Day2_FamFB	3	80	ReverseNoGo	55	70					0								285
Day2_FamFB	3	81	ReverseNoGo	55	70					1								0
Day2_FamFB	3	82	ReverseGo	55	70			1								258
Day2_FamFB	3	83	ReverseGo	55	70			1								315
Day2_FamFB	3	84	ReverseGo	55	70			1								355
Day2_FamFB	3	85	ReverseGo	55	70			1								289
Day2_FamFB	3	86	ReverseGo	55	70			1								322
Day2_FamFB	3	87	ReverseGo	55	70			1								353
Day2_FamFB	3	88	ReverseNoGo	55	70					0								239
Day2_FamFB	3	89	ReverseGo	55	70			1								362
Day2_FamFB	3	90	ReverseGo	55	70			1								255
Day2_FamFB	3	91	ReverseGo	55	70			1								281
Day2_FamFB	3	92	ReverseGo	55	70			1								282
Day2_FamFB	3	93	ReverseGo	55	70			1								339
Day2_FamFB	3	94	ReverseGo	55	70			1								265
Day2_FamFB	3	95	ReverseGo	55	70			1								267
Day2_FamFB	3	96	ReverseGo	55	70			1								324
Day2_FamFB	3	97	ReverseGo	55	70			1								332
Day2_FamFB	3	98	ReverseNoGo	55	70					1								0
Day2_FamFB	3	99	ReverseGo	55	70			1								279
Day2_FamFB	3	100	ReverseGo	55	70			1								375
Day2_FamFB	3	101	ReverseGo	55	70			1								285
Day2_FamFB	3	102	ReverseGo	55	70			1								285
Day2_FamFB	3	103	ReverseGo	55	70			1								317
Day2_FamFB	3	104	ReverseGo	55	70			1								332
Day2_FamFB	3	105	ReverseGo	55	70			1								267
Day2_FamFB	3	106	ReverseGo	55	70			1								333
Day2_FamFB	3	107	ReverseNoGo	55	70					1								0
Day2_FamFB	3	108	ReverseGo	55	70			1								272
Day2_FamFB	3	109	ReverseGo	55	70			1								249
Day2_FamFB	3	110	ReverseGo	55	70			1								267
Day2_FamFB	3	111	ReverseNoGo	55	70					0								308
Day2_FamFB	3	112	ReverseGo	55	70			1								348
Day2_FamFB	3	113	ReverseGo	55	70			1								298
Day2_FamFB	3	114	ReverseGo	55	70			1								234
Day2_FamFB	3	115	ReverseGo	55	70			1								350
Day2_FamFB	3	116	ReverseGo	55	70			1								315
Day2_FamFB	3	117	ReverseGo	55	70			1								299
Day2_FamFB	3	118	ReverseNoGo	55	70					1								0
Day2_FamFB	3	119	ReverseGo	55	70			1								328
Day2_FamFB	3	120	ReverseGo	55	70			0								0
Day2_FamFB	4	1	XGo1	80	50		1								361
Day2_FamFB	4	2	XGo1	80	50		1								302
Day2_FamFB	4	3	XGo1	80	50		1								318
Day2_FamFB	4	4	XGo1	80	50		1								278
Day2_FamFB	4	5	XGo1	80	50		1								246
Day2_FamFB	4	6	XNoGo1	80	50								0								296
Day2_FamFB	4	7	XNoGo1	80	50								1								0
Day2_FamFB	4	8	XGo1	80	50		1								276
Day2_FamFB	4	9	XGo1	80	50		1								301
Day2_FamFB	4	10	XGo1	80	50		1								286
Day2_FamFB	4	11	XGo1	80	50		1								318
Day2_FamFB	4	12	XNoGo1	80	50								1								0
Day2_FamFB	4	13	XGo1	80	50		1								298
Day2_FamFB	4	14	XGo1	80	50		1								265
Day2_FamFB	4	15	XNoGo1	80	50								1								0
Day2_FamFB	4	16	XGo1	80	50		1								335
Day2_FamFB	4	17	XGo1	80	50		1								238
Day2_FamFB	4	18	XGo1	80	50		1								264
Day2_FamFB	4	19	XGo1	80	50		1								338
Day2_FamFB	4	20	XGo1	80	50		1								313
Day2_FamFB	4	21	XGo1	80	50		1								297
Day2_FamFB	4	22	XGo1	80	50		1								288
Day2_FamFB	4	23	XNoGo1	80	50								1								0
Day2_FamFB	4	24	XGo1	80	50		1								348
Day2_FamFB	4	25	XGo1	80	50		1								346
Day2_FamFB	4	26	XNoGo1	80	50								1								0
Day2_FamFB	4	27	XNoGo1	80	50								1								0
Day2_FamFB	4	28	XGo1	80	50		0								0
Day2_FamFB	4	29	XGo1	80	50		1								341
Day2_FamFB	4	30	XGo1	80	50		1								330
Day2_FamFB	4	31	XGo1	80	50		1								26
Day2_FamFB	4	32	XNoGo1	80	50								1								0
Day2_FamFB	4	33	XGo1	80	50		1								321
Day2_FamFB	4	34	XGo1	80	50		1								320
Day2_FamFB	4	35	XGo1	80	50		1								288
Day2_FamFB	4	36	XGo1	80	50		1								361
Day2_FamFB	4	37	XNoGo1	80	50								1								0
Day2_FamFB	4	38	XGo1	80	50		1								272
Day2_FamFB	4	39	XGo1	80	50		1								314
Day2_FamFB	4	40	XGo1	80	50		1								282
Day2_FamFB	4	41	XNoGo1	80	50								1								0
Day2_FamFB	4	42	XGo1	80	50		1								303
Day2_FamFB	4	43	XGo1	80	50		1								287
Day2_FamFB	4	44	XGo1	80	50		1								272
Day2_FamFB	4	45	XGo1	80	50		1								257
Day2_FamFB	4	46	XGo1	80	50		1								324
Day2_FamFB	4	47	XGo1	80	50		0								0
Day2_FamFB	4	48	XGo1	80	50		1								278
Day2_FamFB	4	49	XNoGo1	80	50								1								0
Day2_FamFB	4	50	XGo1	80	50		1								259
Day2_FamFB	4	51	XGo1	80	50		1								372
Day2_FamFB	4	52	XGo1	80	50		1								354
Day2_FamFB	4	53	XGo1	80	50		1								337
Day2_FamFB	4	54	XGo1	80	50		1								304
Day2_FamFB	4	55	XGo1	80	50		1								295
Day2_FamFB	4	56	XGo1	80	50		1								375
Day2_FamFB	4	57	XGo1	80	50		1								316
Day2_FamFB	4	58	XGo1	80	50		1								315
Day2_FamFB	4	59	XGo1	80	50		1								250
Day2_FamFB	4	60	XGo1	80	50		1								309
Day2_FamFB	4	61	XGo1	80	50		1								268
Day2_FamFB	4	62	XGo1	80	50		1								277
Day2_FamFB	4	63	XGo1	80	50		1								335
Day2_FamFB	4	64	XNoGo1	80	50								1								0
Day2_FamFB	4	65	XGo1	80	50		1								241
Day2_FamFB	4	66	XGo1	80	50		1								339
Day2_FamFB	4	67	XNoGo1	80	50								1								0
Day2_FamFB	4	68	XGo1	80	50		1								230
Day2_FamFB	4	69	XGo1	80	50		1								281
Day2_FamFB	4	70	XGo1	80	50		1								258
Day2_FamFB	4	71	XGo1	80	50		1								268
Day2_FamFB	4	72	XGo1	80	50		1								253
Day2_FamFB	4	73	XGo1	80	50		1								247
Day2_FamFB	4	74	XGo1	80	50		1								281
Day2_FamFB	4	75	XGo1	80	50		1								322
Day2_FamFB	4	76	XGo1	80	50		0								0
Day2_FamFB	4	77	XNoGo1	80	50								0								229
Day2_FamFB	4	78	XGo1	80	50		1								376
Day2_FamFB	4	79	XGo1	80	50		1								357
Day2_FamFB	4	80	XGo1	80	50		1								346
Day2_FamFB	4	81	XGo1	80	50		1								376
Day2_FamFB	4	82	XGo1	80	50		0								0
Day2_FamFB	4	83	XGo1	80	50		1								313
Day2_FamFB	4	84	XGo1	80	50		1								393
Day2_FamFB	4	85	XGo1	80	50		0								0
Day2_FamFB	4	86	XGo1	80	50		1								329
Day2_FamFB	4	87	XNoGo1	80	50								1								0
Day2_FamFB	4	88	XGo1	80	50		1								316
Day2_FamFB	4	89	XGo1	80	50		1								346
Day2_FamFB	4	90	XGo1	80	50		0								0
Day2_FamFB	4	91	XGo1	80	50		1								356
Day2_FamFB	4	92	XNoGo1	80	50								1								0
Day2_FamFB	4	93	XGo1	80	50		0								0
Day2_FamFB	4	94	XGo1	80	50		1								396
Day2_FamFB	4	95	XGo1	80	50		0								0
Day2_FamFB	4	96	XNoGo1	80	50								0								274
Day2_FamFB	4	97	XGo1	80	50		1								331
Day2_FamFB	4	98	XGo1	80	50		1								282
Day2_FamFB	4	99	XGo1	80	50		1								307
Day2_FamFB	4	100	XGo1	80	50		1								275
Day2_FamFB	4	101	XGo1	80	50		1								308
Day2_FamFB	4	102	XGo1	80	50		0								0
Day2_FamFB	4	103	XGo1	80	50		1								321
Day2_FamFB	4	104	XGo1	80	50		1								288
Day2_FamFB	4	105	XGo1	80	50		1								296
Day2_FamFB	4	106	XNoGo1	80	50								1								0
Day2_FamFB	4	107	XGo1	80	50		1								284
Day2_FamFB	4	108	XGo1	80	50		1								69
Day2_FamFB	4	109	XGo1	80	50		1								270
Day2_FamFB	4	110	XGo1	80	50		1								232
Day2_FamFB	4	111	XGo1	80	50		1								243
Day2_FamFB	4	112	XNoGo1	80	50								0								237
Day2_FamFB	4	113	XGo1	80	50		1								247
Day2_FamFB	4	114	XGo1	80	50		1								353
Day2_FamFB	4	115	XNoGo1	80	50								1								0
Day2_FamFB	4	116	XGo1	80	50		1								251
Day2_FamFB	4	117	XGo1	80	50		1								350
Day2_FamFB	4	118	XGo1	80	50		1								348
Day2_FamFB	4	119	XGo1	80	50		0								0
Day2_FamFB	4	120	XGo1	80	50		0								0
Day2_FamFB	4	1	ReverseGo1	80	50				1								224
Day2_FamFB	4	2	ReverseGo1	80	50				1								259
Day2_FamFB	4	3	ReverseGo1	80	50				1								301
Day2_FamFB	4	4	ReverseGo1	80	50				1								205
Day2_FamFB	4	5	ReverseGo1	80	50				1								273
Day2_FamFB	4	6	ReverseGo1	80	50				1								283
Day2_FamFB	4	7	ReverseGo1	80	50				1								250
Day2_FamFB	4	8	ReverseNoGo1	80	50						0								229
Day2_FamFB	4	9	ReverseGo1	80	50				1								208
Day2_FamFB	4	10	ReverseNoGo1	80	50						0								227
Day2_FamFB	4	11	ReverseGo1	80	50				1								310
Day2_FamFB	4	12	ReverseGo1	80	50				1								390
Day2_FamFB	4	13	ReverseGo1	80	50				1								355
Day2_FamFB	4	14	ReverseGo1	80	50				1								297
Day2_FamFB	4	15	ReverseGo1	80	50				1								289
Day2_FamFB	4	16	ReverseGo1	80	50				1								321
Day2_FamFB	4	17	ReverseNoGo1	80	50						1								0
Day2_FamFB	4	18	ReverseNoGo1	80	50						0								253
Day2_FamFB	4	19	ReverseGo1	80	50				1								295
Day2_FamFB	4	20	ReverseGo1	80	50				1								247
Day2_FamFB	4	21	ReverseGo1	80	50				1								266
Day2_FamFB	4	22	ReverseGo1	80	50				1								267
Day2_FamFB	4	23	ReverseGo1	80	50				1								340
Day2_FamFB	4	24	ReverseNoGo1	80	50						1								0
Day2_FamFB	4	25	ReverseGo1	80	50				1								263
Day2_FamFB	4	26	ReverseGo1	80	50				1								248
Day2_FamFB	4	27	ReverseGo1	80	50				1								258
Day2_FamFB	4	28	ReverseGo1	80	50				1								300
Day2_FamFB	4	29	ReverseNoGo1	80	50						1								0
Day2_FamFB	4	30	ReverseGo1	80	50				1								281
Day2_FamFB	4	31	ReverseGo1	80	50				1								266
Day2_FamFB	4	32	ReverseGo1	80	50				1								283
Day2_FamFB	4	33	ReverseGo1	80	50				0								0
Day2_FamFB	4	34	ReverseGo1	80	50				1								271
Day2_FamFB	4	35	ReverseGo1	80	50				1								312
Day2_FamFB	4	36	ReverseNoGo1	80	50						1								0
Day2_FamFB	4	37	ReverseGo1	80	50				1								268
Day2_FamFB	4	38	ReverseGo1	80	50				1								286
Day2_FamFB	4	39	ReverseGo1	80	50				1								262
Day2_FamFB	4	40	ReverseGo1	80	50				1								288
Day2_FamFB	4	41	ReverseNoGo1	80	50						0								256
Day2_FamFB	4	42	ReverseGo1	80	50				1								274
Day2_FamFB	4	43	ReverseGo1	80	50				1								251
Day2_FamFB	4	44	ReverseGo1	80	50				1								302
Day2_FamFB	4	45	ReverseGo1	80	50				1								278
Day2_FamFB	4	46	ReverseGo1	80	50				1								287
Day2_FamFB	4	47	ReverseGo1	80	50				1								288
Day2_FamFB	4	48	ReverseNoGo1	80	50						0								241
Day2_FamFB	4	49	ReverseGo1	80	50				1								308
Day2_FamFB	4	50	ReverseGo1	80	50				1								251
Day2_FamFB	4	51	ReverseGo1	80	50				1								277
Day2_FamFB	4	52	ReverseGo1	80	50				1								278
Day2_FamFB	4	53	ReverseGo1	80	50				1								286
Day2_FamFB	4	54	ReverseGo1	80	50				1								295
Day2_FamFB	4	55	ReverseGo1	80	50				1								312
Day2_FamFB	4	56	ReverseNoGo1	80	50						1								0
Day2_FamFB	4	57	ReverseGo1	80	50				1								355
Day2_FamFB	4	58	ReverseGo1	80	50				1								256
Day2_FamFB	4	59	ReverseNoGo1	80	50						1								0
Day2_FamFB	4	60	ReverseGo1	80	50				1								359
Day2_FamFB	4	61	ReverseGo1	80	50				1								276
Day2_FamFB	4	62	ReverseGo1	80	50				1								277
Day2_FamFB	4	63	ReverseGo1	80	50				1								270
Day2_FamFB	4	64	ReverseGo1	80	50				0								0
Day2_FamFB	4	65	ReverseGo1	80	50				1								332
Day2_FamFB	4	66	ReverseGo1	80	50				1								315
Day2_FamFB	4	67	ReverseNoGo1	80	50						1								0
Day2_FamFB	4	68	ReverseGo1	80	50				1								277
Day2_FamFB	4	69	ReverseGo1	80	50				1								270
Day2_FamFB	4	70	ReverseGo1	80	50				1								344
Day2_FamFB	4	71	ReverseGo1	80	50				1								253
Day2_FamFB	4	72	ReverseNoGo1	80	50						0								272
Day2_FamFB	4	73	ReverseGo1	80	50				1								241
Day2_FamFB	4	74	ReverseGo1	80	50				1								268
Day2_FamFB	4	75	ReverseGo1	80	50				1								309
Day2_FamFB	4	76	ReverseGo1	80	50				1								276
Day2_FamFB	4	77	ReverseNoGo1	80	50						0								293
Day2_FamFB	4	78	ReverseGo1	80	50				1								261
Day2_FamFB	4	79	ReverseGo1	80	50				1								303
Day2_FamFB	4	80	ReverseGo1	80	50				1								271
Day2_FamFB	4	81	ReverseGo1	80	50				1								312
Day2_FamFB	4	82	ReverseGo1	80	50				1								288
Day2_FamFB	4	83	ReverseGo1	80	50				1								264
Day2_FamFB	4	84	ReverseGo1	80	50				1								249
Day2_FamFB	4	85	ReverseGo1	80	50				1								308
Day2_FamFB	4	86	ReverseGo1	80	50				1								292
Day2_FamFB	4	87	ReverseNoGo1	80	50						1								0
Day2_FamFB	4	88	ReverseGo1	80	50				1								240
Day2_FamFB	4	89	ReverseGo1	80	50				1								299
Day2_FamFB	4	90	ReverseGo1	80	50				1								323
Day2_FamFB	4	91	ReverseGo1	80	50				1								283
Day2_FamFB	4	92	ReverseGo1	80	50				1								354
Day2_FamFB	4	93	ReverseGo1	80	50				1								272
Day2_FamFB	4	94	ReverseNoGo1	80	50						1								0
Day2_FamFB	4	95	ReverseNoGo1	80	50						0								310
Day2_FamFB	4	96	ReverseGo1	80	50				1								373
Day2_FamFB	4	97	ReverseGo1	80	50				1								299
Day2_FamFB	4	98	ReverseGo1	80	50				1								259
Day2_FamFB	4	99	ReverseGo1	80	50				1								253
Day2_FamFB	4	100	ReverseGo1	80	50				1								247
Day2_FamFB	4	101	ReverseGo1	80	50				1								273
Day2_FamFB	4	102	ReverseNoGo1	80	50						1								0
Day2_FamFB	4	103	ReverseGo1	80	50				1								303
Day2_FamFB	4	104	ReverseGo1	80	50				1								271
Day2_FamFB	4	105	ReverseGo1	80	50				1								256
Day2_FamFB	4	106	ReverseGo1	80	50				1								218
Day2_FamFB	4	107	ReverseGo1	80	50				1								301
Day2_FamFB	4	108	ReverseGo1	80	50				1								261
Day2_FamFB	4	109	ReverseNoGo1	80	50						0								238
Day2_FamFB	4	110	ReverseGo1	80	50				1								297
Day2_FamFB	4	111	ReverseGo1	80	50				1								321
Day2_FamFB	4	112	ReverseGo1	80	50				1								273
Day2_FamFB	4	113	ReverseGo1	80	50				1								267
Day2_FamFB	4	114	ReverseGo1	80	50				1								244
Day2_FamFB	4	115	ReverseGo1	80	50				1								254
Day2_FamFB	4	116	ReverseGo1	80	50				1								281
Day2_FamFB	4	117	ReverseGo1	80	50				1								289
Day2_FamFB	4	118	ReverseGo1	80	50				1								242
Day2_FamFB	4	119	ReverseNoGo1	80	50						0								284
Day2_FamFB	4	120	ReverseGo1	80	50				1								292
Day2_FamFB	5	1	XGo	75	55	1								315
Day2_FamFB	5	2	XGo	75	55	1								331
Day2_FamFB	5	3	XGo	75	55	1								258
Day2_FamFB	5	4	XGo	75	55	1								300
Day2_FamFB	5	5	XGo	75	55	1								268
Day2_FamFB	5	6	XGo	75	55	1								252
Day2_FamFB	5	7	XNoGo	75	55							1								0
Day2_FamFB	5	8	XGo	75	55	1								259
Day2_FamFB	5	9	XGo	75	55	1								316
Day2_FamFB	5	10	XNoGo	75	55							0								268
Day2_FamFB	5	11	XGo	75	55	1								254
Day2_FamFB	5	12	XGo	75	55	1								240
Day2_FamFB	5	13	XGo	75	55	1								322
Day2_FamFB	5	14	XGo	75	55	1								273
Day2_FamFB	5	15	XGo	75	55	1								242
Day2_FamFB	5	16	XNoGo	75	55							1								0
Day2_FamFB	5	17	XGo	75	55	1								241
Day2_FamFB	5	18	XGo	75	55	1								260
Day2_FamFB	5	19	XNoGo	75	55							1								0
Day2_FamFB	5	20	XGo	75	55	1								249
Day2_FamFB	5	21	XGo	75	55	1								276
Day2_FamFB	5	22	XGo	75	55	1								261
Day2_FamFB	5	23	XGo	75	55	1								253
Day2_FamFB	5	24	XGo	75	55	1								287
Day2_FamFB	5	25	XGo	75	55	1								336
Day2_FamFB	5	26	XGo	75	55	1								319
Day2_FamFB	5	27	XGo	75	55	1								262
Day2_FamFB	5	28	XNoGo	75	55							0								280
Day2_FamFB	5	29	XGo	75	55	1								345
Day2_FamFB	5	30	XGo	75	55	1								303
Day2_FamFB	5	31	XGo	75	55	1								286
Day2_FamFB	5	32	XGo	75	55	1								263
Day2_FamFB	5	33	XGo	75	55	1								249
Day2_FamFB	5	34	XGo	75	55	1								259
Day2_FamFB	5	35	XGo	75	55	1								269
Day2_FamFB	5	36	XNoGo	75	55							1								0
Day2_FamFB	5	37	XGo	75	55	1								274
Day2_FamFB	5	38	XNoGo	75	55							0								300
Day2_FamFB	5	39	XGo	75	55	1								316
Day2_FamFB	5	40	XGo	75	55	1								298
Day2_FamFB	5	41	XGo	75	55	1								306
Day2_FamFB	5	42	XGo	75	55	1								242
Day2_FamFB	5	43	XGo	75	55	1								261
Day2_FamFB	5	44	XGo	75	55	1								254
Day2_FamFB	5	45	XGo	75	55	1								296
Day2_FamFB	5	46	XGo	75	55	1								281
Day2_FamFB	5	47	XNoGo	75	55							0								233
Day2_FamFB	5	48	XGo	75	55	1								283
Day2_FamFB	5	49	XGo	75	55	1								260
Day2_FamFB	5	50	XGo	75	55	1								318
Day2_FamFB	5	51	XGo	75	55	1								309
Day2_FamFB	5	52	XGo	75	55	1								285
Day2_FamFB	5	53	XNoGo	75	55							1								0
Day2_FamFB	5	54	XGo	75	55	1								297
Day2_FamFB	5	55	XGo	75	55	1								305
Day2_FamFB	5	56	XGo	75	55	1								297
Day2_FamFB	5	57	XNoGo	75	55							1								0
Day2_FamFB	5	58	XGo	75	55	1								285
Day2_FamFB	5	59	XGo	75	55	1								270
Day2_FamFB	5	60	XGo	75	55	1								304
Day2_FamFB	5	61	XGo	75	55	1								312
Day2_FamFB	5	62	XGo	75	55	1								255
Day2_FamFB	5	63	XNoGo	75	55							1								0
Day2_FamFB	5	64	XGo	75	55	1								309
Day2_FamFB	5	65	XGo	75	55	1								268
Day2_FamFB	5	66	XGo	75	55	1								278
Day2_FamFB	5	67	XGo	75	55	1								254
Day2_FamFB	5	68	XGo	75	55	1								281
Day2_FamFB	5	69	XGo	75	55	1								289
Day2_FamFB	5	70	XNoGo	75	55							1								0
Day2_FamFB	5	71	XGo	75	55	1								286
Day2_FamFB	5	72	XGo	75	55	1								295
Day2_FamFB	5	73	XNoGo	75	55							1								0
Day2_FamFB	5	74	XGo	75	55	1								347
Day2_FamFB	5	75	XGo	75	55	1								305
Day2_FamFB	5	76	XGo	75	55	1								273
Day2_FamFB	5	77	XGo	75	55	1								299
Day2_FamFB	5	78	XGo	75	55	1								322
Day2_FamFB	5	79	XGo	75	55	1								322
Day2_FamFB	5	80	XNoGo	75	55							1								0
Day2_FamFB	5	81	XNoGo	75	55							1								0
Day2_FamFB	5	82	XGo	75	55	1								296
Day2_FamFB	5	83	XGo	75	55	1								304
Day2_FamFB	5	84	XGo	75	55	1								313
Day2_FamFB	5	85	XGo	75	55	1								225
Day2_FamFB	5	86	XGo	75	55	1								251
Day2_FamFB	5	87	XGo	75	55	1								294
Day2_FamFB	5	88	XGo	75	55	1								302
Day2_FamFB	5	89	XGo	75	55	1								302
Day2_FamFB	5	90	XNoGo	75	55							1								0
Day2_FamFB	5	91	XGo	75	55	1								306
Day2_FamFB	5	92	XGo	75	55	1								321
Day2_FamFB	5	93	XGo	75	55	1								289
Day2_FamFB	5	94	XGo	75	55	1								250
Day2_FamFB	5	95	XGo	75	55	1								324
Day2_FamFB	5	96	XGo	75	55	1								332
Day2_FamFB	5	97	XGo	75	55	1								298
Day2_FamFB	5	98	XGo	75	55	1								273
Day2_FamFB	5	99	XNoGo	75	55							1								0
Day2_FamFB	5	100	XGo	75	55	1								263
Day2_FamFB	5	101	XGo	75	55	1								289
Day2_FamFB	5	102	XNoGo	75	55							1								0
Day2_FamFB	5	103	XGo	75	55	1								270
Day2_FamFB	5	104	XGo	75	55	1								239
Day2_FamFB	5	105	XGo	75	55	1								322
Day2_FamFB	5	106	XGo	75	55	1								249
Day2_FamFB	5	107	XGo	75	55	1								323
Day2_FamFB	5	108	XGo	75	55	1								298
Day2_FamFB	5	109	XGo	75	55	1								299
Day2_FamFB	5	110	XGo	75	55	1								331
Day2_FamFB	5	111	XNoGo	75	55							1								0
Day2_FamFB	5	112	XGo	75	55	1								254
Day2_FamFB	5	113	XGo	75	55	1								272
Day2_FamFB	5	114	XGo	75	55	1								354
Day2_FamFB	5	115	XGo	75	55	1								270
Day2_FamFB	5	116	XGo	75	55	1								304
Day2_FamFB	5	117	XGo	75	55	1								297
Day2_FamFB	5	118	XNoGo	75	55							0								256
Day2_FamFB	5	119	XGo	75	55	1								282
Day2_FamFB	5	120	XGo	75	55	1								259
Day2_FamFB	5	1	ReverseGo	75	55			0								0
Day2_FamFB	5	2	ReverseGo	75	55			1								270
Day2_FamFB	5	3	ReverseNoGo	75	55					1								0
Day2_FamFB	5	4	ReverseGo	75	55			1								298
Day2_FamFB	5	5	ReverseGo	75	55			1								307
Day2_FamFB	5	6	ReverseGo	75	55			1								331
Day2_FamFB	5	7	ReverseGo	75	55			1								241
Day2_FamFB	5	8	ReverseGo	75	55			1								276
Day2_FamFB	5	9	ReverseNoGo	75	55					1								0
Day2_FamFB	5	10	ReverseNoGo	75	55					1								0
Day2_FamFB	5	11	ReverseGo	75	55			1								276
Day2_FamFB	5	12	ReverseGo	75	55			0								0
Day2_FamFB	5	13	ReverseGo	75	55			1								281
Day2_FamFB	5	14	ReverseGo	75	55			1								314
Day2_FamFB	5	15	ReverseGo	75	55			1								273
Day2_FamFB	5	16	ReverseGo	75	55			1								291
Day2_FamFB	5	17	ReverseGo	75	55			1								260
Day2_FamFB	5	18	ReverseGo	75	55			1								245
Day2_FamFB	5	19	ReverseGo	75	55			1								264
Day2_FamFB	5	20	ReverseNoGo	75	55					0								264
Day2_FamFB	5	21	ReverseGo	75	55			1								257
Day2_FamFB	5	22	ReverseGo	75	55			0								0
Day2_FamFB	5	23	ReverseGo	75	55			1								272
Day2_FamFB	5	24	ReverseNoGo	75	55					1								0
Day2_FamFB	5	25	ReverseGo	75	55			1								254
Day2_FamFB	5	26	ReverseGo	75	55			1								287
Day2_FamFB	5	27	ReverseGo	75	55			1								265
Day2_FamFB	5	28	ReverseGo	75	55			1								241
Day2_FamFB	5	29	ReverseNoGo	75	55					1								0
Day2_FamFB	5	30	ReverseGo	75	55			1								280
Day2_FamFB	5	31	ReverseGo	75	55			1								305
Day2_FamFB	5	32	ReverseNoGo	75	55					0								281
Day2_FamFB	5	33	ReverseGo	75	55			1								274
Day2_FamFB	5	34	ReverseGo	75	55			1								315
Day2_FamFB	5	35	ReverseGo	75	55			1								331
Day2_FamFB	5	36	ReverseGo	75	55			1								242
Day2_FamFB	5	37	ReverseGo	75	55			1								364
Day2_FamFB	5	38	ReverseGo	75	55			1								273
Day2_FamFB	5	39	ReverseGo	75	55			1								258
Day2_FamFB	5	40	ReverseGo	75	55			1								292
Day2_FamFB	5	41	ReverseGo	75	55			1								236
Day2_FamFB	5	42	ReverseGo	75	55			1								263
Day2_FamFB	5	43	ReverseGo	75	55			1								273
Day2_FamFB	5	44	ReverseNoGo	75	55					0								283
Day2_FamFB	5	45	ReverseGo	75	55			1								283
Day2_FamFB	5	46	ReverseGo	75	55			1								283
Day2_FamFB	5	47	ReverseGo	75	55			1								268
Day2_FamFB	5	48	ReverseGo	75	55			1								294
Day2_FamFB	5	49	ReverseGo	75	55			1								294
Day2_FamFB	5	50	ReverseGo	75	55			1								287
Day2_FamFB	5	51	ReverseNoGo	75	55					1								0
Day2_FamFB	5	52	ReverseGo	75	55			1								283
Day2_FamFB	5	53	ReverseGo	75	55			1								314
Day2_FamFB	5	54	ReverseGo	75	55			1								322
Day2_FamFB	5	55	ReverseNoGo	75	55					1								0
Day2_FamFB	5	56	ReverseGo	75	55			1								278
Day2_FamFB	5	57	ReverseNoGo	75	55					1								0
Day2_FamFB	5	58	ReverseGo	75	55			1								274
Day2_FamFB	5	59	ReverseGo	75	55			1								316
Day2_FamFB	5	60	ReverseGo	75	55			1								324
Day2_FamFB	5	61	ReverseGo	75	55			1								267
Day2_FamFB	5	62	ReverseGo	75	55			1								268
Day2_FamFB	5	63	ReverseGo	75	55			1								277
Day2_FamFB	5	64	ReverseGo	75	55			1								310
Day2_FamFB	5	65	ReverseNoGo	75	55					1								0
Day2_FamFB	5	66	ReverseGo	75	55			1								282
Day2_FamFB	5	67	ReverseGo	75	55			1								283
Day2_FamFB	5	68	ReverseGo	75	55			1								260
Day2_FamFB	5	69	ReverseGo	75	55			1								309
Day2_FamFB	5	70	ReverseGo	75	55			1								292
Day2_FamFB	5	71	ReverseGo	75	55			1								293
Day2_FamFB	5	72	ReverseNoGo	75	55					0								285
Day2_FamFB	5	73	ReverseGo	75	55			1								253
Day2_FamFB	5	74	ReverseGo	75	55			1								295
Day2_FamFB	5	75	ReverseGo	75	55			1								304
Day2_FamFB	5	76	ReverseGo	75	55			1								264
Day2_FamFB	5	77	ReverseGo	75	55			1								274
Day2_FamFB	5	78	ReverseGo	75	55			1								268
Day2_FamFB	5	79	ReverseGo	75	55			1								284
Day2_FamFB	5	80	ReverseNoGo	75	55					0								260
Day2_FamFB	5	81	ReverseNoGo	75	55					1								0
Day2_FamFB	5	82	ReverseGo	75	55			1								331
Day2_FamFB	5	83	ReverseGo	75	55			0								0
Day2_FamFB	5	84	ReverseGo	75	55			1								261
Day2_FamFB	5	85	ReverseGo	75	55			1								263
Day2_FamFB	5	86	ReverseGo	75	55			1								257
Day2_FamFB	5	87	ReverseGo	75	55			1								257
Day2_FamFB	5	88	ReverseNoGo	75	55					0								268
Day2_FamFB	5	89	ReverseGo	75	55			1								309
Day2_FamFB	5	90	ReverseGo	75	55			1								261
Day2_FamFB	5	91	ReverseGo	75	55			1								262
Day2_FamFB	5	92	ReverseGo	75	55			1								280
Day2_FamFB	5	93	ReverseGo	75	55			1								280
Day2_FamFB	5	94	ReverseGo	75	55			1								273
Day2_FamFB	5	95	ReverseGo	75	55			1								265
Day2_FamFB	5	96	ReverseGo	75	55			1								283
Day2_FamFB	5	97	ReverseGo	75	55			1								364
Day2_FamFB	5	98	ReverseNoGo	75	55					1								0
Day2_FamFB	5	99	ReverseGo	75	55			1								238
Day2_FamFB	5	100	ReverseGo	75	55			1								273
Day2_FamFB	5	101	ReverseGo	75	55			1								251
Day2_FamFB	5	102	ReverseGo	75	55			1								324
Day2_FamFB	5	103	ReverseGo	75	55			1								260
Day2_FamFB	5	104	ReverseGo	75	55			1								324
Day2_FamFB	5	105	ReverseGo	75	55			1								260
Day2_FamFB	5	106	ReverseGo	75	55			1								254
Day2_FamFB	5	107	ReverseNoGo	75	55					0								256
Day2_FamFB	5	108	ReverseGo	75	55			1								226
Day2_FamFB	5	109	ReverseGo	75	55			1								261
Day2_FamFB	5	110	ReverseGo	75	55			1								326
Day2_FamFB	5	111	ReverseNoGo	75	55					0								333
Day2_FamFB	5	112	ReverseGo	75	55			1								291
Day2_FamFB	5	113	ReverseGo	75	55			1								259
Day2_FamFB	5	114	ReverseGo	75	55			1								229
Day2_FamFB	5	115	ReverseGo	75	55			1								296
Day2_FamFB	5	116	ReverseGo	75	55			1								264
Day2_FamFB	5	117	ReverseGo	75	55			1								314
Day2_FamFB	5	118	ReverseNoGo	75	55					0								234
Day2_FamFB	5	119	ReverseGo	75	55			1								261
Day2_FamFB	5	120	ReverseGo	75	55			1								254
Day2_FamFB	6	1	XGo1	55	45		1								307
Day2_FamFB	6	2	XGo1	55	45		1								298
Day2_FamFB	6	3	XGo1	55	45		1								339
Day2_FamFB	6	4	XGo1	55	45		1								274
Day2_FamFB	6	5	XGo1	55	45		1								298
Day2_FamFB	6	6	XNoGo1	55	45								0								307
Day2_FamFB	6	7	XNoGo1	55	45								1								0
Day2_FamFB	6	8	XGo1	55	45		1								303
Day2_FamFB	6	9	XGo1	55	45		1								304
Day2_FamFB	6	10	XGo1	55	45		1								296
Day2_FamFB	6	11	XGo1	55	45		1								311
Day2_FamFB	6	12	XNoGo1	55	45								1								0
Day2_FamFB	6	13	XGo1	55	45		1								307
Day2_FamFB	6	14	XGo1	55	45		1								298
Day2_FamFB	6	15	XNoGo1	55	45								1								0
Day2_FamFB	6	16	XGo1	55	45		1								278
Day2_FamFB	6	17	XGo1	55	45		1								263
Day2_FamFB	6	18	XGo1	55	45		1								329
Day2_FamFB	6	19	XGo1	55	45		1								272
Day2_FamFB	6	20	XGo1	55	45		1								289
Day2_FamFB	6	21	XGo1	55	45		1								274
Day2_FamFB	6	22	XGo1	55	45		1								323
Day2_FamFB	6	23	XNoGo1	55	45								0								283
Day2_FamFB	6	24	XGo1	55	45		1								315
Day2_FamFB	6	25	XGo1	55	45		1								331
Day2_FamFB	6	26	XNoGo1	55	45								0								345
Day2_FamFB	6	27	XNoGo1	55	45								1								0
Day2_FamFB	6	28	XGo1	55	45		1								324
Day2_FamFB	6	29	XGo1	55	45		0								0
Day2_FamFB	6	30	XGo1	55	45		1								319
Day2_FamFB	6	31	XGo1	55	45		1								317
Day2_FamFB	6	32	XNoGo1	55	45								1								0
Day2_FamFB	6	33	XGo1	55	45		1								313
Day2_FamFB	6	34	XGo1	55	45		1								280
Day2_FamFB	6	35	XGo1	55	45		1								329
Day2_FamFB	6	36	XGo1	55	45		1								328
Day2_FamFB	6	37	XNoGo1	55	45								1								0
Day2_FamFB	6	38	XGo1	55	45		1								314
Day2_FamFB	6	39	XGo1	55	45		1								354
Day2_FamFB	6	40	XGo1	55	45		1								288
Day2_FamFB	6	41	XNoGo1	55	45								0								328
Day2_FamFB	6	42	XGo1	55	45		1								343
Day2_FamFB	6	43	XGo1	55	45		0								0
Day2_FamFB	6	44	XGo1	55	45		1								242
Day2_FamFB	6	45	XGo1	55	45		1								253
Day2_FamFB	6	46	XGo1	55	45		1								271
Day2_FamFB	6	47	XGo1	55	45		1								311
Day2_FamFB	6	48	XGo1	55	45		1								279
Day2_FamFB	6	49	XNoGo1	55	45								1								0
Day2_FamFB	6	50	XGo1	55	45		1								284
Day2_FamFB	6	51	XGo1	55	45		1								284
Day2_FamFB	6	52	XGo1	55	45		1								326
Day2_FamFB	6	53	XGo1	55	45		1								261
Day2_FamFB	6	54	XGo1	55	45		1								294
Day2_FamFB	6	55	XGo1	55	45		1								303
Day2_FamFB	6	56	XGo1	55	45		1								301
Day2_FamFB	6	57	XGo1	55	45		1								310
Day2_FamFB	6	58	XGo1	55	45		1								349
Day2_FamFB	6	59	XGo1	55	45		1								299
Day2_FamFB	6	60	XGo1	55	45		1								283
Day2_FamFB	6	61	XGo1	55	45		1								317
Day2_FamFB	6	62	XGo1	55	45		1								252
Day2_FamFB	6	63	XGo1	55	45		1								262
Day2_FamFB	6	64	XNoGo1	55	45								0								294
Day2_FamFB	6	65	XGo1	55	45		1								319
Day2_FamFB	6	66	XGo1	55	45		1								302
Day2_FamFB	6	67	XNoGo1	55	45								0								286
Day2_FamFB	6	68	XGo1	55	45		1								311
Day2_FamFB	6	69	XGo1	55	45		1								310
Day2_FamFB	6	70	XGo1	55	45		1								318
Day2_FamFB	6	71	XGo1	55	45		1								278
Day2_FamFB	6	72	XGo1	55	45		1								277
Day2_FamFB	6	73	XGo1	55	45		1								302
Day2_FamFB	6	74	XGo1	55	45		1								398
Day2_FamFB	6	75	XGo1	55	45		1								291
Day2_FamFB	6	76	XGo1	55	45		1								283
Day2_FamFB	6	77	XNoGo1	55	45								0								276
Day2_FamFB	6	78	XGo1	55	45		1								300
Day2_FamFB	6	79	XGo1	55	45		1								292
Day2_FamFB	6	80	XGo1	55	45		1								325
Day2_FamFB	6	81	XGo1	55	45		1								283
Day2_FamFB	6	82	XGo1	55	45		1								292
Day2_FamFB	6	83	XGo1	55	45		1								380
Day2_FamFB	6	84	XGo1	55	45		1								313
Day2_FamFB	6	85	XGo1	55	45		1								305
Day2_FamFB	6	86	XGo1	55	45		1								281
Day2_FamFB	6	87	XNoGo1	55	45								0								354
Day2_FamFB	6	88	XGo1	55	45		1								360
Day2_FamFB	6	89	XGo1	55	45		1								300
Day2_FamFB	6	90	XGo1	55	45		1								300
Day2_FamFB	6	91	XGo1	55	45		1								309
Day2_FamFB	6	92	XNoGo1	55	45								1								0
Day2_FamFB	6	93	XGo1	55	45		1								288
Day2_FamFB	6	94	XGo1	55	45		1								289
Day2_FamFB	6	95	XGo1	55	45		1								346
Day2_FamFB	6	96	XNoGo1	55	45								1								0
Day2_FamFB	6	97	XGo1	55	45		1								308
Day2_FamFB	6	98	XGo1	55	45		1								292
Day2_FamFB	6	99	XGo1	55	45		1								396
Day2_FamFB	6	100	XGo1	55	45		1								303
Day2_FamFB	6	101	XGo1	55	45		1								311
Day2_FamFB	6	102	XGo1	55	45		1								319
Day2_FamFB	6	103	XGo1	55	45		1								310
Day2_FamFB	6	104	XGo1	55	45		1								382
Day2_FamFB	6	105	XGo1	55	45		1								267
Day2_FamFB	6	106	XNoGo1	55	45								1								0
Day2_FamFB	6	107	XGo1	55	45		1								320
Day2_FamFB	6	108	XGo1	55	45		1								271
Day2_FamFB	6	109	XGo1	55	45		1								288
Day2_FamFB	6	110	XGo1	55	45		1								338
Day2_FamFB	6	111	XGo1	55	45		1								281
Day2_FamFB	6	112	XNoGo1	55	45								0								337
Day2_FamFB	6	113	XGo1	55	45		0								0
Day2_FamFB	6	114	XGo1	55	45		1								323
Day2_FamFB	6	115	XNoGo1	55	45								1								0
Day2_FamFB	6	116	XGo1	55	45		1								319
Day2_FamFB	6	117	XGo1	55	45		1								310
Day2_FamFB	6	118	XGo1	55	45		1								317
Day2_FamFB	6	119	XGo1	55	45		1								341
Day2_FamFB	6	120	XGo1	55	45		1								340
Day2_FamFB	6	1	ReverseGo1	55	45				1								294
Day2_FamFB	6	2	ReverseGo1	55	45				1								318
Day2_FamFB	6	3	ReverseGo1	55	45				1								261
Day2_FamFB	6	4	ReverseGo1	55	45				1								295
Day2_FamFB	6	5	ReverseGo1	55	45				1								287
Day2_FamFB	6	6	ReverseGo1	55	45				1								295
Day2_FamFB	6	7	ReverseGo1	55	45				1								263
Day2_FamFB	6	8	ReverseNoGo1	55	45						1								0
Day2_FamFB	6	9	ReverseGo1	55	45				1								276
Day2_FamFB	6	10	ReverseNoGo1	55	45						1								0
Day2_FamFB	6	11	ReverseGo1	55	45				1								266
Day2_FamFB	6	12	ReverseGo1	55	45				1								299
Day2_FamFB	6	13	ReverseGo1	55	45				1								283
Day2_FamFB	6	14	ReverseGo1	55	45				1								293
Day2_FamFB	6	15	ReverseGo1	55	45				1								292
Day2_FamFB	6	16	ReverseGo1	55	45				1								283
Day2_FamFB	6	17	ReverseNoGo1	55	45						1								0
Day2_FamFB	6	18	ReverseNoGo1	55	45						0								289
Day2_FamFB	6	19	ReverseGo1	55	45				1								305
Day2_FamFB	6	20	ReverseGo1	55	45				1								305
Day2_FamFB	6	21	ReverseGo1	55	45				1								330
Day2_FamFB	6	22	ReverseGo1	55	45				1								281
Day2_FamFB	6	23	ReverseGo1	55	45				1								265
Day2_FamFB	6	24	ReverseNoGo1	55	45						1								0
Day2_FamFB	6	25	ReverseGo1	55	45				1								302
Day2_FamFB	6	26	ReverseGo1	55	45				1								309
Day2_FamFB	6	27	ReverseGo1	55	45				1								301
Day2_FamFB	6	28	ReverseGo1	55	45				1								326
Day2_FamFB	6	29	ReverseNoGo1	55	45						1								0
Day2_FamFB	6	30	ReverseGo1	55	45				1								272
Day2_FamFB	6	31	ReverseGo1	55	45				1								305
Day2_FamFB	6	32	ReverseGo1	55	45				1								281
Day2_FamFB	6	33	ReverseGo1	55	45				1								282
Day2_FamFB	6	34	ReverseGo1	55	45				1								251
Day2_FamFB	6	35	ReverseGo1	55	45				1								269
Day2_FamFB	6	36	ReverseNoGo1	55	45						0								255
Day2_FamFB	6	37	ReverseGo1	55	45				1								369
Day2_FamFB	6	38	ReverseGo1	55	45				1								279
Day2_FamFB	6	39	ReverseGo1	55	45				1								263
Day2_FamFB	6	40	ReverseGo1	55	45				1								328
Day2_FamFB	6	41	ReverseNoGo1	55	45						1								0
Day2_FamFB	6	42	ReverseGo1	55	45				1								267
Day2_FamFB	6	43	ReverseGo1	55	45				1								269
Day2_FamFB	6	44	ReverseGo1	55	45				1								238
Day2_FamFB	6	45	ReverseGo1	55	45				1								281
Day2_FamFB	6	46	ReverseGo1	55	45				1								249
Day2_FamFB	6	47	ReverseGo1	55	45				1								268
Day2_FamFB	6	48	ReverseNoGo1	55	45						1								0
Day2_FamFB	6	49	ReverseGo1	55	45				1								305
Day2_FamFB	6	50	ReverseGo1	55	45				1								265
Day2_FamFB	6	51	ReverseGo1	55	45				1								274
Day2_FamFB	6	52	ReverseGo1	55	45				1								259
Day2_FamFB	6	53	ReverseGo1	55	45				1								325
Day2_FamFB	6	54	ReverseGo1	55	45				1								260
Day2_FamFB	6	55	ReverseGo1	55	45				1								286
Day2_FamFB	6	56	ReverseNoGo1	55	45						0								270
Day2_FamFB	6	57	ReverseGo1	55	45				1								295
Day2_FamFB	6	58	ReverseGo1	55	45				1								296
Day2_FamFB	6	59	ReverseNoGo1	55	45						0								271
Day2_FamFB	6	60	ReverseGo1	55	45				1								297
Day2_FamFB	6	61	ReverseGo1	55	45				1								265
Day2_FamFB	6	62	ReverseGo1	55	45				1								386
Day2_FamFB	6	63	ReverseGo1	55	45				1								295
Day2_FamFB	6	64	ReverseGo1	55	45				1								247
Day2_FamFB	6	65	ReverseGo1	55	45				1								312
Day2_FamFB	6	66	ReverseGo1	55	45				1								352
Day2_FamFB	6	67	ReverseNoGo1	55	45						0								278
Day2_FamFB	6	68	ReverseGo1	55	45				1								279
Day2_FamFB	6	69	ReverseGo1	55	45				1								272
Day2_FamFB	6	70	ReverseGo1	55	45				1								298
Day2_FamFB	6	71	ReverseGo1	55	45				1								298
Day2_FamFB	6	72	ReverseNoGo1	55	45						0								306
Day2_FamFB	6	73	ReverseGo1	55	45				1								289
Day2_FamFB	6	74	ReverseGo1	55	45				1								289
Day2_FamFB	6	75	ReverseGo1	55	45				1								323
Day2_FamFB	6	76	ReverseGo1	55	45				1								274
Day2_FamFB	6	77	ReverseNoGo1	55	45						1								0
Day2_FamFB	6	78	ReverseGo1	55	45				1								248
Day2_FamFB	6	79	ReverseGo1	55	45				1								266
Day2_FamFB	6	80	ReverseGo1	55	45				1								307
Day2_FamFB	6	81	ReverseGo1	55	45				1								267
Day2_FamFB	6	82	ReverseGo1	55	45				1								268
Day2_FamFB	6	83	ReverseGo1	55	45				1								277
Day2_FamFB	6	84	ReverseGo1	55	45				1								311
Day2_FamFB	6	85	ReverseGo1	55	45				1								270
Day2_FamFB	6	86	ReverseGo1	55	45				1								263
Day2_FamFB	6	87	ReverseNoGo1	55	45						0								241
Day2_FamFB	6	88	ReverseGo1	55	45				1								308
Day2_FamFB	6	89	ReverseGo1	55	45				1								276
Day2_FamFB	6	90	ReverseGo1	55	45				1								267
Day2_FamFB	6	91	ReverseGo1	55	45				1								333
Day2_FamFB	6	92	ReverseGo1	55	45				1								268
Day2_FamFB	6	93	ReverseGo1	55	45				1								285
Day2_FamFB	6	94	ReverseNoGo1	55	45						0								262
Day2_FamFB	6	95	ReverseNoGo1	55	45						0								280
Day2_FamFB	6	96	ReverseGo1	55	45				1								297
Day2_FamFB	6	97	ReverseGo1	55	45				1								305
Day2_FamFB	6	98	ReverseGo1	55	45				1								296
Day2_FamFB	6	99	ReverseGo1	55	45				1								272
Day2_FamFB	6	100	ReverseGo1	55	45				1								306
Day2_FamFB	6	101	ReverseGo1	55	45				1								306
Day2_FamFB	6	102	ReverseNoGo1	55	45						0								299
Day2_FamFB	6	103	ReverseGo1	55	45				1								291
Day2_FamFB	6	104	ReverseGo1	55	45				1								316
Day2_FamFB	6	105	ReverseGo1	55	45				1								355
Day2_FamFB	6	106	ReverseGo1	55	45				1								305
Day2_FamFB	6	107	ReverseGo1	55	45				1								320
Day2_FamFB	6	108	ReverseGo1	55	45				1								296
Day2_FamFB	6	109	ReverseNoGo1	55	45						1								0
Day2_FamFB	6	110	ReverseGo1	55	45				1								284
Day2_FamFB	6	111	ReverseGo1	55	45				1								301
Day2_FamFB	6	112	ReverseGo1	55	45				1								333
Day2_FamFB	6	113	ReverseGo1	55	45				1								276
Day2_FamFB	6	114	ReverseGo1	55	45				1								301
Day2_FamFB	6	115	ReverseGo1	55	45				1								292
Day2_FamFB	6	116	ReverseGo1	55	45				1								324
Day2_FamFB	6	117	ReverseGo1	55	45				1								323
Day2_FamFB	6	118	ReverseGo1	55	45				1								283
Day2_FamFB	6	119	ReverseNoGo1	55	45						0								284
Day2_FamFB	6	120	ReverseGo1	55	45				1								341
Day2_FamFB	7	1	XGo	65	65	1								321
Day2_FamFB	7	2	XGo	65	65	1								312
Day2_FamFB	7	3	XGo	65	65	1								336
Day2_FamFB	7	4	XGo	65	65	1								351
Day2_FamFB	7	5	XGo	65	65	1								317
Day2_FamFB	7	6	XGo	65	65	1								340
Day2_FamFB	7	7	XNoGo	65	65							1								0
Day2_FamFB	7	8	XGo	65	65	1								286
Day2_FamFB	7	9	XGo	65	65	1								343
Day2_FamFB	7	10	XNoGo	65	65							0								293
Day2_FamFB	7	11	XGo	65	65	1								301
Day2_FamFB	7	12	XGo	65	65	1								254
Day2_FamFB	7	13	XGo	65	65	1								272
Day2_FamFB	7	14	XGo	65	65	1								306
Day2_FamFB	7	15	XGo	65	65	0								0
Day2_FamFB	7	16	XNoGo	65	65							0								277
Day2_FamFB	7	17	XGo	65	65	1								390
Day2_FamFB	7	18	XGo	65	65	1								331
Day2_FamFB	7	19	XNoGo	65	65							1								0
Day2_FamFB	7	20	XGo	65	65	1								261
Day2_FamFB	7	21	XGo	65	65	1								311
Day2_FamFB	7	22	XGo	65	65	1								294
Day2_FamFB	7	23	XGo	65	65	1								357
Day2_FamFB	7	24	XGo	65	65	1								315
Day2_FamFB	7	25	XGo	65	65	1								299
Day2_FamFB	7	26	XGo	65	65	1								387
Day2_FamFB	7	27	XGo	65	65	1								304
Day2_FamFB	7	28	XNoGo	65	65							1								0
Day2_FamFB	7	29	XGo	65	65	1								309
Day2_FamFB	7	30	XGo	65	65	1								333
Day2_FamFB	7	31	XGo	65	65	1								346
Day2_FamFB	7	32	XGo	65	65	1								336
Day2_FamFB	7	33	XGo	65	65	1								352
Day2_FamFB	7	34	XGo	65	65	1								261
Day2_FamFB	7	35	XGo	65	65	1								287
Day2_FamFB	7	36	XNoGo	65	65							0								288
Day2_FamFB	7	37	XGo	65	65	1								361
Day2_FamFB	7	38	XNoGo	65	65							0								286
Day2_FamFB	7	39	XGo	65	65	1								286
Day2_FamFB	7	40	XGo	65	65	1								319
Day2_FamFB	7	41	XGo	65	65	1								295
Day2_FamFB	7	42	XGo	65	65	1								335
Day2_FamFB	7	43	XGo	65	65	1								309
Day2_FamFB	7	44	XGo	65	65	1								309
Day2_FamFB	7	45	XGo	65	65	1								301
Day2_FamFB	7	46	XGo	65	65	1								317
Day2_FamFB	7	47	XNoGo	65	65							1								0
Day2_FamFB	7	48	XGo	65	65	1								256
Day2_FamFB	7	49	XGo	65	65	1								250
Day2_FamFB	7	50	XGo	65	65	1								317
Day2_FamFB	7	51	XGo	65	65	1								268
Day2_FamFB	7	52	XGo	65	65	1								293
Day2_FamFB	7	53	XNoGo	65	65							1								0
Day2_FamFB	7	54	XGo	65	65	1								282
Day2_FamFB	7	55	XGo	65	65	1								307
Day2_FamFB	7	56	XGo	65	65	1								297
Day2_FamFB	7	57	XNoGo	65	65							1								0
Day2_FamFB	7	58	XGo	65	65	1								230
Day2_FamFB	7	59	XGo	65	65	1								256
Day2_FamFB	7	60	XGo	65	65	1								299
Day2_FamFB	7	61	XGo	65	65	1								282
Day2_FamFB	7	62	XGo	65	65	0								0
Day2_FamFB	7	63	XNoGo	65	65							1								0
Day2_FamFB	7	64	XGo	65	65	1								243
Day2_FamFB	7	65	XGo	65	65	1								277
Day2_FamFB	7	66	XGo	65	65	1								278
Day2_FamFB	7	67	XGo	65	65	1								270
Day2_FamFB	7	68	XGo	65	65	1								296
Day2_FamFB	7	69	XGo	65	65	1								273
Day2_FamFB	7	70	XNoGo	65	65							1								0
Day2_FamFB	7	71	XGo	65	65	1								278
Day2_FamFB	7	72	XGo	65	65	1								279
Day2_FamFB	7	73	XNoGo	65	65							1								0
Day2_FamFB	7	74	XGo	65	65	1								299
Day2_FamFB	7	75	XGo	65	65	1								267
Day2_FamFB	7	76	XGo	65	65	1								333
Day2_FamFB	7	77	XGo	65	65	1								396
Day2_FamFB	7	78	XGo	65	65	1								328
Day2_FamFB	7	79	XGo	65	65	1								350
Day2_FamFB	7	80	XNoGo	65	65							0								301
Day2_FamFB	7	81	XNoGo	65	65							1								0
Day2_FamFB	7	82	XGo	65	65	1								384
Day2_FamFB	7	83	XGo	65	65	1								341
Day2_FamFB	7	84	XGo	65	65	1								371
Day2_FamFB	7	85	XGo	65	65	1								361
Day2_FamFB	7	86	XGo	65	65	1								303
Day2_FamFB	7	87	XGo	65	65	1								294
Day2_FamFB	7	88	XGo	65	65	1								303
Day2_FamFB	7	89	XGo	65	65	1								349
Day2_FamFB	7	90	XNoGo	65	65							1								0
Day2_FamFB	7	91	XGo	65	65	0								0
Day2_FamFB	7	92	XGo	65	65	1								316
Day2_FamFB	7	93	XGo	65	65	1								291
Day2_FamFB	7	94	XGo	65	65	1								276
Day2_FamFB	7	95	XGo	65	65	1								285
Day2_FamFB	7	96	XGo	65	65	1								262
Day2_FamFB	7	97	XGo	65	65	1								272
Day2_FamFB	7	98	XGo	65	65	1								384
Day2_FamFB	7	99	XNoGo	65	65							1								0
Day2_FamFB	7	100	XGo	65	65	1								289
Day2_FamFB	7	101	XGo	65	65	1								250
Day2_FamFB	7	102	XNoGo	65	65							1								0
Day2_FamFB	7	103	XGo	65	65	1								272
Day2_FamFB	7	104	XGo	65	65	1								282
Day2_FamFB	7	105	XGo	65	65	1								299
Day2_FamFB	7	106	XGo	65	65	1								361
Day2_FamFB	7	107	XGo	65	65	1								359
Day2_FamFB	7	108	XGo	65	65	1								261
Day2_FamFB	7	109	XGo	65	65	1								302
Day2_FamFB	7	110	XGo	65	65	1								311
Day2_FamFB	7	111	XNoGo	65	65							0								278
Day2_FamFB	7	112	XGo	65	65	1								303
Day2_FamFB	7	113	XGo	65	65	1								335
Day2_FamFB	7	114	XGo	65	65	1								357
Day2_FamFB	7	115	XGo	65	65	0								0
Day2_FamFB	7	116	XGo	65	65	1								271
Day2_FamFB	7	117	XGo	65	65	1								272
Day2_FamFB	7	118	XNoGo	65	65							0								265
Day2_FamFB	7	119	XGo	65	65	1								275
Day2_FamFB	7	120	XGo	65	65	0								0
Day2_FamFB	7	1	ReverseGo	65	65			1								291
Day2_FamFB	7	2	ReverseGo	65	65			1								316
Day2_FamFB	7	3	ReverseNoGo	65	65					1								0
Day2_FamFB	7	4	ReverseGo	65	65			1								271
Day2_FamFB	7	5	ReverseGo	65	65			1								337
Day2_FamFB	7	6	ReverseGo	65	65			1								311
Day2_FamFB	7	7	ReverseGo	65	65			1								271
Day2_FamFB	7	8	ReverseGo	65	65			1								297
Day2_FamFB	7	9	ReverseNoGo	65	65					1								0
Day2_FamFB	7	10	ReverseNoGo	65	65					1								0
Day2_FamFB	7	11	ReverseGo	65	65			1								320
Day2_FamFB	7	12	ReverseGo	65	65			1								271
Day2_FamFB	7	13	ReverseGo	65	65			1								273
Day2_FamFB	7	14	ReverseGo	65	65			0								0
Day2_FamFB	7	15	ReverseGo	65	65			1								375
Day2_FamFB	7	16	ReverseGo	65	65			1								252
Day2_FamFB	7	17	ReverseGo	65	65			1								286
Day2_FamFB	7	18	ReverseGo	65	65			1								295
Day2_FamFB	7	19	ReverseGo	65	65			1								382
Day2_FamFB	7	20	ReverseNoGo	65	65					1								0
Day2_FamFB	7	21	ReverseGo	65	65			1								279
Day2_FamFB	7	22	ReverseGo	65	65			1								248
Day2_FamFB	7	23	ReverseGo	65	65			1								250
Day2_FamFB	7	24	ReverseNoGo	65	65					0								324
Day2_FamFB	7	25	ReverseGo	65	65			1								276
Day2_FamFB	7	26	ReverseGo	65	65			1								365
Day2_FamFB	7	27	ReverseGo	65	65			1								305
Day2_FamFB	7	28	ReverseGo	65	65			1								313
Day2_FamFB	7	29	ReverseNoGo	65	65					1								0
Day2_FamFB	7	30	ReverseGo	65	65			1								317
Day2_FamFB	7	31	ReverseGo	65	65			1								325
Day2_FamFB	7	32	ReverseNoGo	65	65					1								0
Day2_FamFB	7	33	ReverseGo	65	65			1								304
Day2_FamFB	7	34	ReverseGo	65	65			1								288
Day2_FamFB	7	35	ReverseGo	65	65			1								320
Day2_FamFB	7	36	ReverseGo	65	65			1								359
Day2_FamFB	7	37	ReverseGo	65	65			1								277
Day2_FamFB	7	38	ReverseGo	65	65			1								278
Day2_FamFB	7	39	ReverseGo	65	65			1								270
Day2_FamFB	7	40	ReverseGo	65	65			1								280
Day2_FamFB	7	41	ReverseGo	65	65			1								304
Day2_FamFB	7	42	ReverseGo	65	65			1								312
Day2_FamFB	7	43	ReverseGo	65	65			1								303
Day2_FamFB	7	44	ReverseNoGo	65	65					1								0
Day2_FamFB	7	45	ReverseGo	65	65			1								292
Day2_FamFB	7	46	ReverseGo	65	65			1								325
Day2_FamFB	7	47	ReverseGo	65	65			1								324
Day2_FamFB	7	48	ReverseGo	65	65			1								299
Day2_FamFB	7	49	ReverseGo	65	65			1								276
Day2_FamFB	7	50	ReverseGo	65	65			1								309
Day2_FamFB	7	51	ReverseNoGo	65	65					1								0
Day2_FamFB	7	52	ReverseGo	65	65			1								256
Day2_FamFB	7	53	ReverseGo	65	65			1								258
Day2_FamFB	7	54	ReverseGo	65	65			1								252
Day2_FamFB	7	55	ReverseNoGo	65	65					0								311
Day2_FamFB	7	56	ReverseGo	65	65			1								278
Day2_FamFB	7	57	ReverseNoGo	65	65					0								375
Day2_FamFB	7	58	ReverseGo	65	65			0								0
Day2_FamFB	7	59	ReverseGo	65	65			1								376
Day2_FamFB	7	60	ReverseGo	65	65			1								340
Day2_FamFB	7	61	ReverseGo	65	65			1								307
Day2_FamFB	7	62	ReverseGo	65	65			1								298
Day2_FamFB	7	63	ReverseGo	65	65			1								323
Day2_FamFB	7	64	ReverseGo	65	65			1								259
Day2_FamFB	7	65	ReverseNoGo	65	65					1								0
Day2_FamFB	7	66	ReverseGo	65	65			1								312
Day2_FamFB	7	67	ReverseGo	65	65			1								287
Day2_FamFB	7	68	ReverseGo	65	65			1								279
Day2_FamFB	7	69	ReverseGo	65	65			1								272
Day2_FamFB	7	70	ReverseGo	65	65			1								330
Day2_FamFB	7	71	ReverseGo	65	65			1								265
Day2_FamFB	7	72	ReverseNoGo	65	65					0								298
Day2_FamFB	7	73	ReverseGo	65	65			1								331
Day2_FamFB	7	74	ReverseGo	65	65			1								281
Day2_FamFB	7	75	ReverseGo	65	65			1								290
Day2_FamFB	7	76	ReverseGo	65	65			1								283
Day2_FamFB	7	77	ReverseGo	65	65			1								258
Day2_FamFB	7	78	ReverseGo	65	65			1								356
Day2_FamFB	7	79	ReverseGo	65	65			1								363
Day2_FamFB	7	80	ReverseNoGo	65	65					1								0
Day2_FamFB	7	81	ReverseNoGo	65	65					0								268
Day2_FamFB	7	82	ReverseGo	65	65			0								0
Day2_FamFB	7	83	ReverseGo	65	65			1								306
Day2_FamFB	7	84	ReverseGo	65	65			1								282
Day2_FamFB	7	85	ReverseGo	65	65			1								306
Day2_FamFB	7	86	ReverseGo	65	65			1								282
Day2_FamFB	7	87	ReverseGo	65	65			1								275
Day2_FamFB	7	88	ReverseNoGo	65	65					1								0
Day2_FamFB	7	89	ReverseGo	65	65			1								297
Day2_FamFB	7	90	ReverseGo	65	65			1								320
Day2_FamFB	7	91	ReverseGo	65	65			1								280
Day2_FamFB	7	92	ReverseGo	65	65			0								0
Day2_FamFB	7	93	ReverseGo	65	65			1								293
Day2_FamFB	7	94	ReverseGo	65	65			1								324
Day2_FamFB	7	95	ReverseGo	65	65			1								300
Day2_FamFB	7	96	ReverseGo	65	65			1								260
Day2_FamFB	7	97	ReverseGo	65	65			1								269
Day2_FamFB	7	98	ReverseNoGo	65	65					0								239
Day2_FamFB	7	99	ReverseGo	65	65			1								281
Day2_FamFB	7	100	ReverseGo	65	65			1								363
Day2_FamFB	7	101	ReverseGo	65	65			1								336
Day2_FamFB	7	102	ReverseGo	65	65			1								302
Day2_FamFB	7	103	ReverseGo	65	65			1								326
Day2_FamFB	7	104	ReverseGo	65	65			1								333
Day2_FamFB	7	105	ReverseGo	65	65			1								259
Day2_FamFB	7	106	ReverseGo	65	65			1								285
Day2_FamFB	7	107	ReverseNoGo	65	65					1								0
Day2_FamFB	7	108	ReverseGo	65	65			1								354
Day2_FamFB	7	109	ReverseGo	65	65			1								296
Day2_FamFB	7	110	ReverseGo	65	65			0								0
Day2_FamFB	7	111	ReverseNoGo	65	65					1								0
Day2_FamFB	7	112	ReverseGo	65	65			1								288
Day2_FamFB	7	113	ReverseGo	65	65			0								0
Day2_FamFB	7	114	ReverseGo	65	65			1								325
Day2_FamFB	7	115	ReverseGo	65	65			1								348
Day2_FamFB	7	116	ReverseGo	65	65			1								258
Day2_FamFB	7	117	ReverseGo	65	65			1								292
Day2_FamFB	7	118	ReverseNoGo	65	65					0								269
Day2_FamFB	7	119	ReverseGo	65	65			1								245
Day2_FamFB	7	120	ReverseGo	65	65			1								271
Day2_FamFB	8	1	XGo1	90	100		1								329
Day2_FamFB	8	2	XGo1	90	100		0								0
Day2_FamFB	8	3	XGo1	90	100		1								317
Day2_FamFB	8	4	XGo1	90	100		1								356
Day2_FamFB	8	5	XGo1	90	100		1								273
Day2_FamFB	8	6	XNoGo1	90	100								1								0
Day2_FamFB	8	7	XNoGo1	90	100								1								0
Day2_FamFB	8	8	XGo1	90	100		1								378
Day2_FamFB	8	9	XGo1	90	100		1								279
Day2_FamFB	8	10	XGo1	90	100		1								312
Day2_FamFB	8	11	XGo1	90	100		1								319
Day2_FamFB	8	12	XNoGo1	90	100								1								0
Day2_FamFB	8	13	XGo1	90	100		1								298
Day2_FamFB	8	14	XGo1	90	100		1								290
Day2_FamFB	8	15	XNoGo1	90	100								1								0
Day2_FamFB	8	16	XGo1	90	100		1								295
Day2_FamFB	8	17	XGo1	90	100		1								271
Day2_FamFB	8	18	XGo1	90	100		1								312
Day2_FamFB	8	19	XGo1	90	100		1								264
Day2_FamFB	8	20	XGo1	90	100		1								274
Day2_FamFB	8	21	XGo1	90	100		1								299
Day2_FamFB	8	22	XGo1	90	100		1								273
Day2_FamFB	8	23	XNoGo1	90	100								1								0
Day2_FamFB	8	24	XGo1	90	100		1								247
Day2_FamFB	8	25	XGo1	90	100		1								266
Day2_FamFB	8	26	XNoGo1	90	100								1								0
Day2_FamFB	8	27	XNoGo1	90	100								1								0
Day2_FamFB	8	28	XGo1	90	100		1								323
Day2_FamFB	8	29	XGo1	90	100		1								347
Day2_FamFB	8	30	XGo1	90	100		1								296
Day2_FamFB	8	31	XGo1	90	100		1								288
Day2_FamFB	8	32	XNoGo1	90	100								1								0
Day2_FamFB	8	33	XGo1	90	100		1								357
Day2_FamFB	8	34	XGo1	90	100		1								299
Day2_FamFB	8	35	XGo1	90	100		1								292
Day2_FamFB	8	36	XGo1	90	100		1								292
Day2_FamFB	8	37	XNoGo1	90	100								1								0
Day2_FamFB	8	38	XGo1	90	100		1								312
Day2_FamFB	8	39	XGo1	90	100		1								360
Day2_FamFB	8	40	XGo1	90	100		1								333
Day2_FamFB	8	41	XNoGo1	90	100								0								340
Day2_FamFB	8	42	XGo1	90	100		1								387
Day2_FamFB	8	43	XGo1	90	100		1								312
Day2_FamFB	8	44	XGo1	90	100		1								295
Day2_FamFB	8	45	XGo1	90	100		1								319
Day2_FamFB	8	46	XGo1	90	100		1								319
Day2_FamFB	8	47	XGo1	90	100		1								317
Day2_FamFB	8	48	XGo1	90	100		1								357
Day2_FamFB	8	49	XNoGo1	90	100								1								0
Day2_FamFB	8	50	XGo1	90	100		1								327
Day2_FamFB	8	51	XGo1	90	100		1								334
Day2_FamFB	8	52	XGo1	90	100		1								324
Day2_FamFB	8	53	XGo1	90	100		1								340
Day2_FamFB	8	54	XGo1	90	100		1								283
Day2_FamFB	8	55	XGo1	90	100		1								306
Day2_FamFB	8	56	XGo1	90	100		1								290
Day2_FamFB	8	57	XGo1	90	100		1								330
Day2_FamFB	8	58	XGo1	90	100		0								0
Day2_FamFB	8	59	XGo1	90	100		1								302
Day2_FamFB	8	60	XGo1	90	100		1								334
Day2_FamFB	8	61	XGo1	90	100		1								285
Day2_FamFB	8	62	XGo1	90	100		1								334
Day2_FamFB	8	63	XGo1	90	100		1								323
Day2_FamFB	8	64	XNoGo1	90	100								0								395
Day2_FamFB	8	65	XGo1	90	100		1								327
Day2_FamFB	8	66	XGo1	90	100		1								318
Day2_FamFB	8	67	XNoGo1	90	100								1								0
Day2_FamFB	8	68	XGo1	90	100		1								305
Day2_FamFB	8	69	XGo1	90	100		1								354
Day2_FamFB	8	70	XGo1	90	100		1								319
Day2_FamFB	8	71	XGo1	90	100		0								0
Day2_FamFB	8	72	XGo1	90	100		1								354
Day2_FamFB	8	73	XGo1	90	100		1								304
Day2_FamFB	8	74	XGo1	90	100		1								312
Day2_FamFB	8	75	XGo1	90	100		1								304
Day2_FamFB	8	76	XGo1	90	100		1								328
Day2_FamFB	8	77	XNoGo1	90	100								1								0
Day2_FamFB	8	78	XGo1	90	100		1								339
Day2_FamFB	8	79	XGo1	90	100		1								313
Day2_FamFB	8	80	XGo1	90	100		1								305
Day2_FamFB	8	81	XGo1	90	100		1								321
Day2_FamFB	8	82	XGo1	90	100		1								320
Day2_FamFB	8	83	XGo1	90	100		1								336
Day2_FamFB	8	84	XGo1	90	100		1								295
Day2_FamFB	8	85	XGo1	90	100		1								303
Day2_FamFB	8	86	XGo1	90	100		1								279
Day2_FamFB	8	87	XNoGo1	90	100								1								0
Day2_FamFB	8	88	XGo1	90	100		1								299
Day2_FamFB	8	89	XGo1	90	100		1								291
Day2_FamFB	8	90	XGo1	90	100		1								307
Day2_FamFB	8	91	XGo1	90	100		0								0
Day2_FamFB	8	92	XNoGo1	90	100								1								0
Day2_FamFB	8	93	XGo1	90	100		1								340
Day2_FamFB	8	94	XGo1	90	100		1								370
Day2_FamFB	8	95	XGo1	90	100		1								319
Day2_FamFB	8	96	XNoGo1	90	100								1								0
Day2_FamFB	8	97	XGo1	90	100		1								282
Day2_FamFB	8	98	XGo1	90	100		1								379
Day2_FamFB	8	99	XGo1	90	100		0								0
Day2_FamFB	8	100	XGo1	90	100		1								316
Day2_FamFB	8	101	XGo1	90	100		1								379
Day2_FamFB	8	102	XGo1	90	100		1								328
Day2_FamFB	8	103	XGo1	90	100		1								335
Day2_FamFB	8	104	XGo1	90	100		1								357
Day2_FamFB	8	105	XGo1	90	100		1								316
Day2_FamFB	8	106	XNoGo1	90	100								1								0
Day2_FamFB	8	107	XGo1	90	100		1								287
Day2_FamFB	8	108	XGo1	90	100		1								320
Day2_FamFB	8	109	XGo1	90	100		1								352
Day2_FamFB	8	110	XGo1	90	100		1								358
Day2_FamFB	8	111	XGo1	90	100		1								372
Day2_FamFB	8	112	XNoGo1	90	100								1								0
Day2_FamFB	8	113	XGo1	90	100		1								372
Day2_FamFB	8	114	XGo1	90	100		1								298
Day2_FamFB	8	115	XNoGo1	90	100								1								0
Day2_FamFB	8	116	XGo1	90	100		0								0
Day2_FamFB	8	117	XGo1	90	100		1								354
Day2_FamFB	8	118	XGo1	90	100		1								312
Day2_FamFB	8	119	XGo1	90	100		0								0
Day2_FamFB	8	120	XGo1	90	100		1								284
Day2_FamFB	8	1	ReverseGo1	90	100				1								391
Day2_FamFB	8	2	ReverseGo1	90	100				0								0
Day2_FamFB	8	3	ReverseGo1	90	100				1								295
Day2_FamFB	8	4	ReverseGo1	90	100				1								328
Day2_FamFB	8	5	ReverseGo1	90	100				1								295
Day2_FamFB	8	6	ReverseGo1	90	100				1								288
Day2_FamFB	8	7	ReverseGo1	90	100				1								351
Day2_FamFB	8	8	ReverseNoGo1	90	100						1								0
Day2_FamFB	8	9	ReverseGo1	90	100				1								298
Day2_FamFB	8	10	ReverseNoGo1	90	100						1								0
Day2_FamFB	8	11	ReverseGo1	90	100				1								286
Day2_FamFB	8	12	ReverseGo1	90	100				1								286
Day2_FamFB	8	13	ReverseGo1	90	100				1								303
Day2_FamFB	8	14	ReverseGo1	90	100				1								326
Day2_FamFB	8	15	ReverseGo1	90	100				1								341
Day2_FamFB	8	16	ReverseGo1	90	100				1								308
Day2_FamFB	8	17	ReverseNoGo1	90	100						1								0
Day2_FamFB	8	18	ReverseNoGo1	90	100						1								0
Day2_FamFB	8	19	ReverseGo1	90	100				1								284
Day2_FamFB	8	20	ReverseGo1	90	100				1								292
Day2_FamFB	8	21	ReverseGo1	90	100				1								293
Day2_FamFB	8	22	ReverseGo1	90	100				1								285
Day2_FamFB	8	23	ReverseGo1	90	100				1								325
Day2_FamFB	8	24	ReverseNoGo1	90	100						1								0
Day2_FamFB	8	25	ReverseGo1	90	100				1								305
Day2_FamFB	8	26	ReverseGo1	90	100				1								289
Day2_FamFB	8	27	ReverseGo1	90	100				1								297
Day2_FamFB	8	28	ReverseGo1	90	100				1								321
Day2_FamFB	8	29	ReverseNoGo1	90	100						1								0
Day2_FamFB	8	30	ReverseGo1	90	100				1								365
Day2_FamFB	8	31	ReverseGo1	90	100				1								353
Day2_FamFB	8	32	ReverseGo1	90	100				1								328
Day2_FamFB	8	33	ReverseGo1	90	100				1								310
Day2_FamFB	8	34	ReverseGo1	90	100				1								309
Day2_FamFB	8	35	ReverseGo1	90	100				1								333
Day2_FamFB	8	36	ReverseNoGo1	90	100						1								0
Day2_FamFB	8	37	ReverseGo1	90	100				0								0
Day2_FamFB	8	38	ReverseGo1	90	100				1								277
Day2_FamFB	8	39	ReverseGo1	90	100				1								278
Day2_FamFB	8	40	ReverseGo1	90	100				1								285
Day2_FamFB	8	41	ReverseNoGo1	90	100						1								0
Day2_FamFB	8	42	ReverseGo1	90	100				1								306
Day2_FamFB	8	43	ReverseGo1	90	100				1								267
Day2_FamFB	8	44	ReverseGo1	90	100				1								292
Day2_FamFB	8	45	ReverseGo1	90	100				1								357
Day2_FamFB	8	46	ReverseGo1	90	100				1								339
Day2_FamFB	8	47	ReverseGo1	90	100				1								314
Day2_FamFB	8	48	ReverseNoGo1	90	100						1								0
Day2_FamFB	8	49	ReverseGo1	90	100				1								324
Day2_FamFB	8	50	ReverseGo1	90	100				1								291
Day2_FamFB	8	51	ReverseGo1	90	100				1								324
Day2_FamFB	8	52	ReverseGo1	90	100				1								300
Day2_FamFB	8	53	ReverseGo1	90	100				1								316
Day2_FamFB	8	54	ReverseGo1	90	100				1								300
Day2_FamFB	8	55	ReverseGo1	90	100				1								324
Day2_FamFB	8	56	ReverseNoGo1	90	100						1								0
Day2_FamFB	8	57	ReverseGo1	90	100				1								278
Day2_FamFB	8	58	ReverseGo1	90	100				1								287
Day2_FamFB	8	59	ReverseNoGo1	90	100						1								0
Day2_FamFB	8	60	ReverseGo1	90	100				1								380
Day2_FamFB	8	61	ReverseGo1	90	100				1								337
Day2_FamFB	8	62	ReverseGo1	90	100				1								328
Day2_FamFB	8	63	ReverseGo1	90	100				1								303
Day2_FamFB	8	64	ReverseGo1	90	100				1								326
Day2_FamFB	8	65	ReverseGo1	90	100				1								308
Day2_FamFB	8	66	ReverseGo1	90	100				1								324
Day2_FamFB	8	67	ReverseNoGo1	90	100						1								0
Day2_FamFB	8	68	ReverseGo1	90	100				1								312
Day2_FamFB	8	69	ReverseGo1	90	100				1								368
Day2_FamFB	8	70	ReverseGo1	90	100				1								309
Day2_FamFB	8	71	ReverseGo1	90	100				1								332
Day2_FamFB	8	72	ReverseNoGo1	90	100						1								0
Day2_FamFB	8	73	ReverseGo1	90	100				0								0
Day2_FamFB	8	74	ReverseGo1	90	100				1								299
Day2_FamFB	8	75	ReverseGo1	90	100				1								267
Day2_FamFB	8	76	ReverseGo1	90	100				1								356
Day2_FamFB	8	77	ReverseNoGo1	90	100						1								0
Day2_FamFB	8	78	ReverseGo1	90	100				1								295
Day2_FamFB	8	79	ReverseGo1	90	100				1								335
Day2_FamFB	8	80	ReverseGo1	90	100				1								357
Day2_FamFB	8	81	ReverseGo1	90	100				1								330
Day2_FamFB	8	82	ReverseGo1	90	100				1								297
Day2_FamFB	8	83	ReverseGo1	90	100				1								265
Day2_FamFB	8	84	ReverseGo1	90	100				1								339
Day2_FamFB	8	85	ReverseGo1	90	100				1								282
Day2_FamFB	8	86	ReverseGo1	90	100				1								395
Day2_FamFB	8	87	ReverseNoGo1	90	100						1								0
Day2_FamFB	8	88	ReverseGo1	90	100				1								315
Day2_FamFB	8	89	ReverseGo1	90	100				1								321
Day2_FamFB	8	90	ReverseGo1	90	100				1								297
Day2_FamFB	8	91	ReverseGo1	90	100				1								353
Day2_FamFB	8	92	ReverseGo1	90	100				1								311
Day2_FamFB	8	93	ReverseGo1	90	100				1								294
Day2_FamFB	8	94	ReverseNoGo1	90	100						1								0
Day2_FamFB	8	95	ReverseNoGo1	90	100						1								0
Day2_FamFB	8	96	ReverseGo1	90	100				0								0
Day2_FamFB	8	97	ReverseGo1	90	100				1								322
Day2_FamFB	8	98	ReverseGo1	90	100				1								338
Day2_FamFB	8	99	ReverseGo1	90	100				1								336
Day2_FamFB	8	100	ReverseGo1	90	100				1								343
Day2_FamFB	8	101	ReverseGo1	90	100				1								341
Day2_FamFB	8	102	ReverseNoGo1	90	100						1								0
Day2_FamFB	8	103	ReverseGo1	90	100				1								344
Day2_FamFB	8	104	ReverseGo1	90	100				1								366
Day2_FamFB	8	105	ReverseGo1	90	100				1								362
Day2_FamFB	8	106	ReverseGo1	90	100				0								0
Day2_FamFB	8	107	ReverseGo1	90	100				1								325
Day2_FamFB	8	108	ReverseGo1	90	100				1								308
Day2_FamFB	8	109	ReverseNoGo1	90	100						1								0
Day2_FamFB	8	110	ReverseGo1	90	100				1								312
Day2_FamFB	8	111	ReverseGo1	90	100				1								335
Day2_FamFB	8	112	ReverseGo1	90	100				1								383
Day2_FamFB	8	113	ReverseGo1	90	100				1								370
Day2_FamFB	8	114	ReverseGo1	90	100				1								296
Day2_FamFB	8	115	ReverseGo1	90	100				1								280
Day2_FamFB	8	116	ReverseGo1	90	100				1								305
Day2_FamFB	8	117	ReverseGo1	90	100				1								305
Day2_FamFB	8	118	ReverseGo1	90	100				1								321
Day2_FamFB	8	119	ReverseNoGo1	90	100						1								0
Day2_FamFB	8	120	ReverseGo1	90	100				1								293
Day2_FamFB	13	1	XGo	70	75	0								0
Day2_FamFB	13	2	XGo	70	75	1								335
Day2_FamFB	13	3	XGo	70	75	1								300
Day2_FamFB	13	4	XGo	70	75	1								324
Day2_FamFB	13	5	XGo	70	75	1								372
Day2_FamFB	13	6	XGo	70	75	1								249
Day2_FamFB	13	7	XNoGo	70	75							1								0
Day2_FamFB	13	8	XGo	70	75	1								231
Day2_FamFB	13	9	XGo	70	75	1								291
Day2_FamFB	13	10	XNoGo	70	75							1								0
Day2_FamFB	13	11	XGo	70	75	1								278
Day2_FamFB	13	12	XGo	70	75	1								295
Day2_FamFB	13	13	XGo	70	75	1								319
Day2_FamFB	13	14	XGo	70	75	1								311
Day2_FamFB	13	15	XGo	70	75	1								254
Day2_FamFB	13	16	XNoGo	70	75							0								288
Day2_FamFB	13	17	XGo	70	75	1								274
Day2_FamFB	13	18	XGo	70	75	0								0
Day2_FamFB	13	19	XNoGo	70	75							1								0
Day2_FamFB	13	20	XGo	70	75	1								266
Day2_FamFB	13	21	XGo	70	75	1								364
Day2_FamFB	13	22	XGo	70	75	1								289
Day2_FamFB	13	23	XGo	70	75	1								274
Day2_FamFB	13	24	XGo	70	75	1								259
Day2_FamFB	13	25	XGo	70	75	1								221
Day2_FamFB	13	26	XGo	70	75	1								297
Day2_FamFB	13	27	XGo	70	75	1								233
Day2_FamFB	13	28	XNoGo	70	75							1								0
Day2_FamFB	13	29	XGo	70	75	1								254
Day2_FamFB	13	30	XGo	70	75	1								337
Day2_FamFB	13	31	XGo	70	75	1								271
Day2_FamFB	13	32	XGo	70	75	1								369
Day2_FamFB	13	33	XGo	70	75	1								302
Day2_FamFB	13	34	XGo	70	75	0								0
Day2_FamFB	13	35	XGo	70	75	1								251
Day2_FamFB	13	36	XNoGo	70	75							1								0
Day2_FamFB	13	37	XGo	70	75	1								273
Day2_FamFB	13	38	XNoGo	70	75							1								0
Day2_FamFB	13	39	XGo	70	75	1								278
Day2_FamFB	13	40	XGo	70	75	1								343
Day2_FamFB	13	41	XGo	70	75	1								269
Day2_FamFB	13	42	XGo	70	75	1								335
Day2_FamFB	13	43	XGo	70	75	1								254
Day2_FamFB	13	44	XGo	70	75	1								286
Day2_FamFB	13	45	XGo	70	75	1								263
Day2_FamFB	13	46	XGo	70	75	1								329
Day2_FamFB	13	47	XNoGo	70	75							1								0
Day2_FamFB	13	48	XGo	70	75	1								276
Day2_FamFB	13	49	XGo	70	75	1								340
Day2_FamFB	13	50	XGo	70	75	1								299
Day2_FamFB	13	51	XGo	70	75	1								251
Day2_FamFB	13	52	XGo	70	75	1								270
Day2_FamFB	13	53	XNoGo	70	75							0								351
Day2_FamFB	13	54	XGo	70	75	1								253
Day2_FamFB	13	55	XGo	70	75	1								263
Day2_FamFB	13	56	XGo	70	75	1								312
Day2_FamFB	13	57	XNoGo	70	75							0								247
Day2_FamFB	13	58	XGo	70	75	1								329
Day2_FamFB	13	59	XGo	70	75	1								392
Day2_FamFB	13	60	XGo	70	75	1								397
Day2_FamFB	13	61	XGo	70	75	1								351
Day2_FamFB	13	62	XGo	70	75	1								325
Day2_FamFB	13	63	XNoGo	70	75							1								0
Day2_FamFB	13	64	XGo	70	75	1								377
Day2_FamFB	13	65	XGo	70	75	1								277
Day2_FamFB	13	66	XGo	70	75	1								262
Day2_FamFB	13	67	XGo	70	75	1								288
Day2_FamFB	13	68	XGo	70	75	1								345
Day2_FamFB	13	69	XGo	70	75	1								311
Day2_FamFB	13	70	XNoGo	70	75							1								0
Day2_FamFB	13	71	XGo	70	75	1								290
Day2_FamFB	13	72	XGo	70	75	1								322
Day2_FamFB	13	73	XNoGo	70	75							0								330
Day2_FamFB	13	74	XGo	70	75	1								305
Day2_FamFB	13	75	XGo	70	75	1								361
Day2_FamFB	13	76	XGo	70	75	1								246
Day2_FamFB	13	77	XGo	70	75	1								272
Day2_FamFB	13	78	XGo	70	75	0								0
Day2_FamFB	13	79	XGo	70	75	1								277
[truncated: 23,081 more rows]
