# Supplementary material for: Habit Expression and Disruption as a Function of Attention-Deficit/Hyperactivity Disorder Symptomology
Source: Front Psychol. 2019 Sep 3;10:1997. doi: 10.3389/fpsyg.2019.01997 (PMC6733985; doi:10.3389/fpsyg.2019.01997)
Supplement: Supplementary file 1 [file Data_Sheet_1.ZIP › df_dprime_long_mm.csv]

	X	Subject	StimulusType	Congruency	FeedbackCond	DV	dprime	Cong_Order	Stim_Order	ASRS_A	ASRS_B	ASRS_Total	COHS	Age	Gender	Drive	Diagnosis
1	0	1	Familiar	Congruent	NoFeedback	FamCongDay1_dprime	0.527894210843465	0	0	18	10	28	131	23	0	84	0
2	1	2	Familiar	Congruent	NoFeedback	FamCongDay1_dprime	0.865748632320123	0	0	12	10	22	111	19	0	16	0
3	2	3	Familiar	Congruent	NoFeedback	FamCongDay1_dprime	0.517617986416921	1	0	10	10	20	83	19	1	1	0
4	3	4	Familiar	Congruent	NoFeedback	FamCongDay1_dprime	0.638983385046015	1	0	18	13	31	105	18	0	18	0
5	4	5	Familiar	Congruent	NoFeedback	FamCongDay1_dprime	0.865748632320123	2	1	22	17	39	77	20	0	27	1
6	5	6	Familiar	Congruent	NoFeedback	FamCongDay1_dprime	0.593931445969882	2	1	8	18	26	105	18	1	6	0
7	6	7	Familiar	Congruent	NoFeedback	FamCongDay1_dprime	0.588308733233815	1	1	19	16	35	101	18	1	12	0
8	7	8	Familiar	Congruent	NoFeedback	FamCongDay1_dprime	0.974086693330535	3	1	13	12	27	101	20	1	36	0
9	8	9	Familiar	Congruent	NoFeedback	FamCongDay1_dprime	0.685519101218786	0	0	14	6	20	94	22	1	0	0
10	9	10	Familiar	Congruent	NoFeedback	FamCongDay1_dprime	0.608534169511636	0	0	23	13	36	106	18	1	0	0
11	10	11	Familiar	Congruent	NoFeedback	FamCongDay1_dprime	0.614356608583256	3	0	20	17	37	112	18	0	0	0
12	11	12	Familiar	Congruent	NoFeedback	FamCongDay1_dprime	0.938995312023132	1	0	16	15	31	101	18	1	18	0
13	12	13	Familiar	Congruent	NoFeedback	FamCongDay1_dprime	0.695685098639547	2	1	12	8	20	115	23	1	72	0
14	13	14	Familiar	Congruent	NoFeedback	FamCongDay1_dprime	0.628817387625254	2	1	14	13	27	104	18	1	3	0
15	14	15	Familiar	Congruent	NoFeedback	FamCongDay1_dprime	0.757093261891085	3	1	13	12	25	109	20	1	0	0
16	15	16	Familiar	Congruent	NoFeedback	FamCongDay1_dprime	0.679835997432032	3	1	15	4	19	77	19	0	0	0
17	16	18	Familiar	Congruent	NoFeedback	FamCongDay1_dprime	0.896692508528717	0	0	12	9	21	89	18	0	15	0
18	17	19	Familiar	Congruent	NoFeedback	FamCongDay1_dprime	0.645010446827348	1	0	18	15	33	101	18	1	7	0
19	18	20	Familiar	Congruent	NoFeedback	FamCongDay1_dprime	0.700391548297553	1	0	20	11	31	108	19	0	30	0
20	19	21	Familiar	Congruent	NoFeedback	FamCongDay1_dprime	0.963864116437104	2	1	14	9	23	81	18	1	18	0
21	20	22	Familiar	Congruent	NoFeedback	FamCongDay1_dprime	0.695685098639547	2	1	15	13	28	99	18	1	8	0
22	21	23	Familiar	Congruent	NoFeedback	FamCongDay1_dprime	1.06402446050012	3	1	16	12	28	102	18	1	27	0
23	22	24	Familiar	Congruent	NoFeedback	FamCongDay1_dprime	0.784734986413067	3	1	15	20	35	116	23	0	81	0
24	23	25	Familiar	Congruent	NoFeedback	FamCongDay1_dprime	0.855482603710441	0	0	15	11	26	113	18	1	16	0
25	24	26	Familiar	Congruent	NoFeedback	FamCongDay1_dprime	0.527884015026604	0	0	12	18	30	112	18	0	20	0
26	25	27	Familiar	Congruent	NoFeedback	FamCongDay1_dprime	0.972337201692777	1	0	10	8	18	101	18	1	7	0
27	26	28	Familiar	Congruent	NoFeedback	FamCongDay1_dprime	0.877587148771594	1	0	9	10	19	90	18	0	8	0
28	27	29	Familiar	Congruent	NoFeedback	FamCongDay1_dprime	0.486949104627874	2	1	6	5	11	98	18	1	12	0
29	28	30	Familiar	Congruent	NoFeedback	FamCongDay1_dprime	0.847137933237215	2	1	13	13	26	113	20	1	36	0
30	29	31	Familiar	Congruent	NoFeedback	FamCongDay1_dprime	0.42870210707311	3	1	16	7	23	96	18	1	12	0
31	30	32	Familiar	Congruent	NoFeedback	FamCongDay1_dprime	0.231149688631333	3	1	15	10	25	98	18	0	16	0
32	31	33	Familiar	Congruent	NoFeedback	FamCongDay1_dprime	0.373957037255107	0	0	14	13	27	95	18	1	0	0
33	32	34	Familiar	Congruent	NoFeedback	FamCongDay1_dprime	0.94930953025007	0	0	13	13	26	103	18	1	24	0
34	33	35	Familiar	Congruent	NoFeedback	FamCongDay1_dprime	0.845238884534768	1	0	26	23	49	95	18	1	4	0
35	34	36	Familiar	Congruent	NoFeedback	FamCongDay1_dprime	0.673202944400475	1	0	18	15	33	101	19	1	36	0
36	35	38	Familiar	Congruent	NoFeedback	FamCongDay1_dprime	1.05375843189044	2	1	16	14	30	108	19	1	0	0
37	36	39	Familiar	Congruent	NoFeedback	FamCongDay1_dprime	0.685519101218786	3	1	25	15	40	112	18	1	12	0
38	37	40	Familiar	Congruent	NoFeedback	FamCongDay1_dprime	0.723676877668344	3	1	8	12	20	86	20	0	36	0
39	38	41	Familiar	Congruent	NoFeedback	FamCongDay1_dprime	0.335564864719586	0	0	14	11	25	94	18	0	2	0
40	39	42	Familiar	Congruent	NoFeedback	FamCongDay1_dprime	0.746803739635247	0	0	13	1	14	84	20	0	48	0
41	40	43	Familiar	Congruent	NoFeedback	FamCongDay1_dprime	0.855482603710441	1	0	18	7	25	119	21	1	60	0
42	41	44	Familiar	Congruent	NoFeedback	FamCongDay1_dprime	0.362309545976671	1	0	21	12	33	75	18	0	24	1
43	42	45	Familiar	Congruent	NoFeedback	FamCongDay1_dprime	0.835016307641337	2	1	20	21	41	84	18	1	7	0
44	43	46	Familiar	Congruent	NoFeedback	FamCongDay1_dprime	0.923162429685462	2	1	21	11	32	96	19	1	0	0
45	44	47	Familiar	Congruent	NoFeedback	FamCongDay1_dprime	0.293463913320768	3	1	9	8	17	93	18	1	26	0
46	45	48	Familiar	Congruent	NoFeedback	FamCongDay1_dprime	0.543179097561268	3	1	13	12	25	89	20	1	13	0
47	46	49	Familiar	Congruent	NoFeedback	FamCongDay1_dprime	0.804463993903662	0	0	5	0	5	78	20	1	24	0
48	47	50	Familiar	Congruent	NoFeedback	FamCongDay1_dprime	0.499294163648321	0	0	18	17	35	108	18	1	6	0
49	48	51	Familiar	Congruent	NoFeedback	FamCongDay1_dprime	0.876038154575962	1	0	11	8	19	98	18	1	0	0
50	49	52	Familiar	Congruent	NoFeedback	FamCongDay1_dprime	0.876038154575962	1	0	18	13	31	87	18	1	0	0
51	50	53	Familiar	Congruent	NoFeedback	FamCongDay1_dprime	0.141517318783686	2	1	26	23	49	95	25	1	120	0
52	51	54	Familiar	Congruent	NoFeedback	FamCongDay1_dprime	0.547997112006563	2	1	12	16	28	114	18	1	6	0
53	52	55	Familiar	Congruent	NoFeedback	FamCongDay1_dprime	0.824813721921394	3	1	18	15	33	84	19	1	10	0
54	53	56	Familiar	Congruent	NoFeedback	FamCongDay1_dprime	0.527894210843465	2	1	13	16	29	107	19	1	36	0
55	54	57	Familiar	Congruent	NoFeedback	FamCongDay1_dprime	0.588308733233815	3	1	22	20	42	101	19	1	20	0
56	55	58	Familiar	Congruent	NoFeedback	FamCongDay1_dprime	0.784734986413067	0	0	16	16	32	89	25	1	72	0
57	56	59	Familiar	Congruent	NoFeedback	FamCongDay1_dprime	0.855482603710441	0	0	22	16	38	131	20	1	0	0
58	57	60	Familiar	Congruent	NoFeedback	FamCongDay1_dprime	0.601465760661176	1	0	23	19	42	110	19	1	32	0
59	58	61	Familiar	Congruent	NoFeedback	FamCongDay1_dprime	0.814629991324423	1	0	20	23	43	104	23	1	9	0
60	59	62	Familiar	Congruent	NoFeedback	FamCongDay1_dprime	0.892803148307992	3	1	14	0	14	99	45	1	300	1
61	60	63	Familiar	Congruent	NoFeedback	FamCongDay1_dprime	0.679835997432032	2	1	15	12	27	93	18	1	3	0
62	61	64	Familiar	Congruent	NoFeedback	FamCongDay1_dprime	0.659369701362928	3	1	17	12	29	95	21	1	52	0
63	62	65	Familiar	Congruent	NoFeedback	FamCongDay1_dprime	0.342640117745197	3	1	17	19	36	97	21	0	70	0
64	63	66	Familiar	Congruent	NoFeedback	FamCongDay1_dprime	0.876038154575962	0	0	20	9	29	96	18	1	3	0
65	64	67	Familiar	Congruent	NoFeedback	FamCongDay1_dprime	0.994596441115891	0	0	13	16	29	108	18	0	0	0
66	65	68	Familiar	Congruent	NoFeedback	FamCongDay1_dprime	0.845238884534768	1	0	23	16	39	121	18	1	6	0
67	66	69	Familiar	Congruent	NoFeedback	FamCongDay1_dprime	0.94930953025007	1	0	19	20	39	80	18	0	4	0
68	67	70	Familiar	Congruent	NoFeedback	FamCongDay1_dprime	1.04351471271477	2	1	16	13	29	99	18	1	12	0
69	68	71	Familiar	Congruent	NoFeedback	FamCongDay1_dprime	0.507374267241248	2	1	9	10	19	96	23	1	84	0
70	69	72	Familiar	Congruent	NoFeedback	FamCongDay1_dprime	0.5125981934493	3	1	23	20	43	112	19	1	18	0
71	70	73	Familiar	Congruent	NoFeedback	FamCongDay1_dprime	0.455240582277651	3	1	9	14	23	124	19	1	7	0
72	71	74	Familiar	Congruent	NoFeedback	FamCongDay1_dprime	0.452579939626373	0	0	27	17	44	68	19	1	20	0
73	72	75	Familiar	Congruent	NoFeedback	FamCongDay1_dprime	0.837018530959951	0	0	12	19	31	124	18	1	48	0
74	73	76	Familiar	Congruent	NoFeedback	FamCongDay1_dprime	0.527884015026604	1	0	9	13	22	88	20	0	60	0
75	74	77	Familiar	Congruent	NoFeedback	FamCongDay1_dprime	0.486039852318845	1	0	13	18	31	122	21	0	36	0
76	75	78	Familiar	Congruent	NoFeedback	FamCongDay1_dprime	0.723676877668344	2	1	4	6	10	119	31	1	168	0
77	76	79	Familiar	Congruent	NoFeedback	FamCongDay1_dprime	0.32250703356619	2	1	12	14	26	91	19	1	12	0
78	77	80	Familiar	Congruent	NoFeedback	FamCongDay1_dprime	0.553298499838532	3	1	12	10	22	82	20	1	6	0
79	78	81	Familiar	Congruent	NoFeedback	FamCongDay1_dprime	0.384063071255663	3	1	8	10	18	83	21	1	5	0
80	79	82	Familiar	Congruent	NoFeedback	FamCongDay1_dprime	0.897973465088507	0	0	7	11	18	108	24	1	84	0
81	80	83	Familiar	Congruent	NoFeedback	FamCongDay1_dprime	0.812310024373653	0	0	11	3	14	83	42	1	324	1
82	81	84	Familiar	Congruent	NoFeedback	FamCongDay1_dprime	0.716071414956461	1	0	24	15	39	69	24	1	48	0
83	82	85	Familiar	Congruent	NoFeedback	FamCongDay1_dprime	1.04351471271477	1	0	15	4	19	119	19	1	6	0
84	83	86	Familiar	Congruent	NoFeedback	FamCongDay1_dprime	0.835016307641337	2	1	16	11	27	118	19	1	13	0
85	84	87	Familiar	Congruent	NoFeedback	FamCongDay1_dprime	0.527884015026604	2	1	12	15	27	89	18	0	16	0
86	85	88	Familiar	Congruent	NoFeedback	FamCongDay1_dprime	0.743960095781962	3	1	26	14	40	96	21	1	60	0
87	86	89	Familiar	Congruent	NoFeedback	FamCongDay1_dprime	0.0903614371292585	3	1	17	18	35	102	18	0	4	0
88	87	90	Familiar	Congruent	NoFeedback	FamCongDay1_dprime	0.713557475391079	0	0	26	15	41	79	25	1	4	0
89	88	91	Familiar	Congruent	NoFeedback	FamCongDay1_dprime	0.659369701362928	0	0	15	11	26	114	19	0	22	1
90	89	92	Familiar	Congruent	NoFeedback	FamCongDay1_dprime	0.489174761371057	1	0	25	25	50	67	20	1	60	0
91	90	93	Familiar	Congruent	NoFeedback	FamCongDay1_dprime	0.93331180269943	1	0	10	5	15	82	21	0	36	0
92	91	94	Familiar	Congruent	NoFeedback	FamCongDay1_dprime	0.363012067652596	2	1	28	11	39	86	24	1	84	0
93	92	95	Familiar	Congruent	NoFeedback	FamCongDay1_dprime	0.690102026041714	2	1	18	18	36	114	18	1	8	1
94	93	96	Familiar	Congruent	NoFeedback	FamCongDay1_dprime	1.02554031732448	3	1	17	16	33	101	31	1	144	0
95	94	97	Familiar	Congruent	NoFeedback	FamCongDay1_dprime	0.191866798041576	3	1	18	19	37	99	22	1	0	0
96	95	98	Familiar	Congruent	NoFeedback	FamCongDay1_dprime	0.972337201692777	0	0	12	10	22	84	22	0	15	0
97	96	99	Familiar	Congruent	NoFeedback	FamCongDay1_dprime	0.716071414956461	0	0	24	19	23	100	18	1	19	0
98	97	100	Familiar	Congruent	NoFeedback	FamCongDay1_dprime	0.943477800120191	1	0	25	21	46	107	20	1	36	0
99	98	101	Familiar	Congruent	NoFeedback	FamCongDay1_dprime	0.474246929243307	1	0	23	19	42	104	18	1	12	0
100	99	102	Familiar	Congruent	NoFeedback	FamCongDay1_dprime	0.753861608954958	2	1	11	9	20	86	18	1	20	0
101	100	103	Familiar	Congruent	NoFeedback	FamCongDay1_dprime	0.690102026041714	2	1	17	18	35	114	20	0	58	0
102	101	104	Familiar	Congruent	NoFeedback	FamCongDay1_dprime	0.593931445969882	3	1	13	13	26	104	20	1	0	0
103	102	105	Familiar	Congruent	NoFeedback	FamCongDay1_dprime	0.77406137351278	3	1	16	15	31	100	21	1	48	0
104	103	106	Familiar	Congruent	NoFeedback	FamCongDay1_dprime	0.224382714020023	0	0	6	2	8	88	22	1	36	0
105	104	1	Familiar	Incongruent	NoFeedback	FamIncongDay1_dprime	0.0200543703529506	0	0	18	10	28	131	23	0	84	0
106	105	2	Familiar	Incongruent	NoFeedback	FamIncongDay1_dprime	0.736537711025565	0	0	12	10	22	111	19	0	16	0
107	106	3	Familiar	Incongruent	NoFeedback	FamIncongDay1_dprime	0.383361795670328	1	0	10	10	20	83	19	1	1	0
108	107	4	Familiar	Incongruent	NoFeedback	FamIncongDay1_dprime	0.726293991849891	1	0	18	13	31	105	18	0	18	0
109	108	5	Familiar	Incongruent	NoFeedback	FamIncongDay1_dprime	0.726293991849891	2	1	22	17	39	77	20	0	27	1
110	109	6	Familiar	Incongruent	NoFeedback	FamIncongDay1_dprime	0.424631689067306	2	1	8	18	26	105	18	1	6	0
111	110	7	Familiar	Incongruent	NoFeedback	FamIncongDay1_dprime	0.663139820163271	1	1	19	16	35	101	18	1	12	0
112	111	8	Familiar	Incongruent	NoFeedback	FamIncongDay1_dprime	0.974086693330535	3	1	13	12	27	101	20	1	36	0
113	112	9	Familiar	Incongruent	NoFeedback	FamIncongDay1_dprime	0.43619675621926	0	0	14	6	20	94	22	1	0	0
114	113	10	Familiar	Incongruent	NoFeedback	FamIncongDay1_dprime	0.57821500267655	0	0	23	13	36	106	18	1	0	0
115	114	11	Familiar	Incongruent	NoFeedback	FamIncongDay1_dprime	0.634866356368611	3	0	20	17	37	112	18	0	0	0
116	115	12	Familiar	Incongruent	NoFeedback	FamIncongDay1_dprime	0.679835997432032	1	0	16	15	31	101	18	1	18	0
117	116	13	Familiar	Incongruent	NoFeedback	FamIncongDay1_dprime	0.342728849538978	2	1	12	8	20	115	23	1	72	0
118	117	14	Familiar	Incongruent	NoFeedback	FamIncongDay1_dprime	0.373178065073357	2	1	14	13	27	104	18	1	3	0
119	118	15	Familiar	Incongruent	NoFeedback	FamIncongDay1_dprime	0.456450003596174	3	1	13	12	25	109	20	1	0	0
120	119	16	Familiar	Incongruent	NoFeedback	FamIncongDay1_dprime	0.794978705588741	3	1	15	4	19	77	19	0	0	0
121	120	18	Familiar	Incongruent	NoFeedback	FamIncongDay1_dprime	0.928705789767294	0	0	12	9	21	89	18	0	15	0
122	121	19	Familiar	Incongruent	NoFeedback	FamIncongDay1_dprime	0.468974996813235	1	0	18	15	33	101	18	1	7	0
123	122	20	Familiar	Incongruent	NoFeedback	FamIncongDay1_dprime	0.659369701362928	1	0	20	11	31	108	19	0	30	0
124	123	21	Familiar	Incongruent	NoFeedback	FamIncongDay1_dprime	0.499294163648321	2	1	14	9	23	81	18	1	18	0
125	124	22	Familiar	Incongruent	NoFeedback	FamIncongDay1_dprime	0.543179097561268	2	1	15	13	28	99	18	1	8	0
126	125	23	Familiar	Incongruent	NoFeedback	FamIncongDay1_dprime	0.974086693330535	3	1	16	12	28	102	18	1	27	0
127	126	24	Familiar	Incongruent	NoFeedback	FamIncongDay1_dprime	0.352862694638628	3	1	15	20	35	116	23	0	81	0
128	127	25	Familiar	Incongruent	NoFeedback	FamIncongDay1_dprime	0.743960095781962	0	0	15	11	26	113	18	1	16	0
129	128	26	Familiar	Incongruent	NoFeedback	FamIncongDay1_dprime	0.231149688631333	0	0	12	18	30	112	18	0	20	0
130	129	27	Familiar	Incongruent	NoFeedback	FamIncongDay1_dprime	0.534427193808315	1	0	10	8	18	101	18	1	7	0
131	130	28	Familiar	Incongruent	NoFeedback	FamIncongDay1_dprime	0.994596441115891	1	0	9	10	19	90	18	0	8	0
132	131	29	Familiar	Incongruent	NoFeedback	FamIncongDay1_dprime	0.624600327758929	2	1	6	5	11	98	18	1	12	0
133	132	30	Familiar	Incongruent	NoFeedback	FamIncongDay1_dprime	0.221947849494801	2	1	13	13	26	113	20	1	36	0
134	133	31	Familiar	Incongruent	NoFeedback	FamIncongDay1_dprime	0.512896849952875	3	1	16	7	23	96	18	1	12	0
135	134	32	Familiar	Incongruent	NoFeedback	FamIncongDay1_dprime	0.201122798961511	3	1	15	10	25	98	18	0	16	0
136	135	33	Familiar	Incongruent	NoFeedback	FamIncongDay1_dprime	0.675369728204818	0	0	14	13	27	95	18	1	0	0
137	136	34	Familiar	Incongruent	NoFeedback	FamIncongDay1_dprime	0.928705789767294	0	0	13	13	26	103	18	1	24	0
138	137	35	Familiar	Incongruent	NoFeedback	FamIncongDay1_dprime	0.519577381761939	1	0	26	23	49	95	18	1	4	0
139	138	36	Familiar	Incongruent	NoFeedback	FamIncongDay1_dprime	0.275396711479208	1	0	18	15	33	101	19	1	36	0
140	139	38	Familiar	Incongruent	NoFeedback	FamIncongDay1_dprime	0.953661530717161	2	1	16	14	30	108	19	1	0	0
141	140	39	Familiar	Incongruent	NoFeedback	FamIncongDay1_dprime	0.805244734198423	3	1	25	15	40	112	18	1	12	0
142	141	40	Familiar	Incongruent	NoFeedback	FamIncongDay1_dprime	0.726293991849891	3	1	8	12	20	86	20	0	36	0
143	142	41	Familiar	Incongruent	NoFeedback	FamIncongDay1_dprime	0.0402383087825133	0	0	14	11	25	94	18	0	2	0
144	143	42	Familiar	Incongruent	NoFeedback	FamIncongDay1_dprime	0.322253801428284	0	0	13	1	14	84	20	0	48	0
145	144	43	Familiar	Incongruent	NoFeedback	FamIncongDay1_dprime	0.984330412506209	1	0	18	7	25	119	21	1	60	0
146	145	44	Familiar	Incongruent	NoFeedback	FamIncongDay1_dprime	0.213230292950832	1	0	21	12	33	75	18	0	24	1
147	146	45	Familiar	Incongruent	NoFeedback	FamIncongDay1_dprime	0.251402936008247	2	1	20	21	41	84	18	1	7	0
148	147	46	Familiar	Incongruent	NoFeedback	FamIncongDay1_dprime	0.665235883105168	2	1	21	11	32	96	19	1	0	0
149	148	47	Familiar	Incongruent	NoFeedback	FamIncongDay1_dprime	0.261552309022215	3	1	9	8	17	93	18	1	26	0
150	149	48	Familiar	Incongruent	NoFeedback	FamIncongDay1_dprime	0.634916716270082	3	1	13	12	25	89	20	1	13	0
151	150	49	Familiar	Incongruent	NoFeedback	FamIncongDay1_dprime	0.659369701362928	0	0	5	0	5	78	20	1	24	0
152	151	50	Familiar	Incongruent	NoFeedback	FamIncongDay1_dprime	0.733810722767994	0	0	18	17	35	108	18	1	6	0
153	152	51	Familiar	Incongruent	NoFeedback	FamIncongDay1_dprime	0.794978705588741	1	0	11	8	19	98	18	1	0	0
154	153	52	Familiar	Incongruent	NoFeedback	FamIncongDay1_dprime	0.539927109779671	1	0	18	13	31	87	18	1	0	0
155	154	53	Familiar	Incongruent	NoFeedback	FamIncongDay1_dprime	0.222403226927206	2	1	26	23	49	95	25	1	120	0
156	155	54	Familiar	Incongruent	NoFeedback	FamIncongDay1_dprime	0.527894210843465	2	1	12	16	28	114	18	1	6	0
157	156	55	Familiar	Incongruent	NoFeedback	FamIncongDay1_dprime	0.659369701362928	3	1	18	15	33	84	19	1	10	0
158	157	56	Familiar	Incongruent	NoFeedback	FamIncongDay1_dprime	0.171023585849728	2	1	13	16	29	107	19	1	36	0
159	158	57	Familiar	Incongruent	NoFeedback	FamIncongDay1_dprime	0.458892513762664	3	1	22	20	42	101	19	1	20	0
160	159	58	Familiar	Incongruent	NoFeedback	FamIncongDay1_dprime	0.938995312023132	0	0	16	16	32	89	25	1	72	0
161	160	59	Familiar	Incongruent	NoFeedback	FamIncongDay1_dprime	0.553298499838532	0	0	22	16	38	131	20	1	0	0
162	161	60	Familiar	Incongruent	NoFeedback	FamIncongDay1_dprime	0.669592278256359	1	0	23	19	42	110	19	1	32	0
163	162	61	Familiar	Incongruent	NoFeedback	FamIncongDay1_dprime	0.582841507271216	1	0	20	23	43	104	23	1	9	0
164	163	62	Familiar	Incongruent	NoFeedback	FamIncongDay1_dprime	0.766497974569044	3	1	14	0	14	99	45	1	300	1
165	164	63	Familiar	Incongruent	NoFeedback	FamIncongDay1_dprime	0.151739895677117	2	1	15	12	27	93	18	1	3	0
166	165	64	Familiar	Incongruent	NoFeedback	FamIncongDay1_dprime	0.261552309022215	3	1	17	12	29	95	21	1	52	0
167	166	65	Familiar	Incongruent	NoFeedback	FamIncongDay1_dprime	0.673202944400475	3	1	17	19	36	97	21	0	70	0
168	167	66	Familiar	Incongruent	NoFeedback	FamIncongDay1_dprime	0.764309823799693	0	0	20	9	29	96	18	1	3	0
169	168	67	Familiar	Incongruent	NoFeedback	FamIncongDay1_dprime	0.876038154575962	0	0	13	16	29	108	18	0	0	0
170	169	68	Familiar	Incongruent	NoFeedback	FamIncongDay1_dprime	0.618668014611285	1	0	23	16	39	121	18	1	6	0
171	170	69	Familiar	Incongruent	NoFeedback	FamIncongDay1_dprime	0.94930953025007	1	0	19	20	39	80	18	0	4	0
172	171	70	Familiar	Incongruent	NoFeedback	FamIncongDay1_dprime	0.887770879368565	2	1	16	13	29	99	18	1	12	0
173	172	71	Familiar	Incongruent	NoFeedback	FamIncongDay1_dprime	0.64515587862445	2	1	9	10	19	96	23	1	84	0
174	173	72	Familiar	Incongruent	NoFeedback	FamIncongDay1_dprime	0.5297433791827	3	1	23	20	43	112	19	1	18	0
175	174	73	Familiar	Incongruent	NoFeedback	FamIncongDay1_dprime	0.383361795670328	3	1	9	14	23	124	19	1	7	0
176	175	74	Familiar	Incongruent	NoFeedback	FamIncongDay1_dprime	0.713588719214833	0	0	27	17	44	68	19	1	20	0
177	176	75	Familiar	Incongruent	NoFeedback	FamIncongDay1_dprime	0.507815609299476	0	0	12	19	31	124	18	1	48	0
178	177	76	Familiar	Incongruent	NoFeedback	FamIncongDay1_dprime	0.865748632320123	1	0	9	13	22	88	20	0	60	0
179	178	77	Familiar	Incongruent	NoFeedback	FamIncongDay1_dprime	0.560352272393045	1	0	13	18	31	122	21	0	36	0
180	179	78	Familiar	Incongruent	NoFeedback	FamIncongDay1_dprime	0.442547206061594	2	1	4	6	10	119	31	1	168	0
181	180	79	Familiar	Incongruent	NoFeedback	FamIncongDay1_dprime	0.0813141082935084	2	1	12	14	26	91	19	1	12	0
182	181	80	Familiar	Incongruent	NoFeedback	FamIncongDay1_dprime	0.373957037255107	3	1	12	10	22	82	20	1	6	0
183	182	81	Familiar	Incongruent	NoFeedback	FamIncongDay1_dprime	0.373178065073357	3	1	8	10	18	83	21	1	5	0
184	183	82	Familiar	Incongruent	NoFeedback	FamIncongDay1_dprime	0.786600875732143	0	0	7	11	18	108	24	1	84	0
185	184	83	Familiar	Incongruent	NoFeedback	FamIncongDay1_dprime	0.871705310193103	0	0	11	3	14	83	42	1	324	1
186	185	84	Familiar	Incongruent	NoFeedback	FamIncongDay1_dprime	0.746803739635247	1	0	24	15	39	69	24	1	48	0
187	186	85	Familiar	Incongruent	NoFeedback	FamIncongDay1_dprime	0.908196041981938	1	0	15	4	19	119	19	1	6	0
188	187	86	Familiar	Incongruent	NoFeedback	FamIncongDay1_dprime	0.312087804007523	2	1	16	11	27	118	19	1	13	0
189	188	87	Familiar	Incongruent	NoFeedback	FamIncongDay1_dprime	0.180869551584597	2	1	12	15	27	89	18	0	16	0
190	189	88	Familiar	Incongruent	NoFeedback	FamIncongDay1_dprime	0.77406137351278	3	1	26	14	40	96	21	1	60	0
191	190	89	Familiar	Incongruent	NoFeedback	FamIncongDay1_dprime	0.210949924073511	3	1	17	18	35	102	18	0	4	0
192	191	90	Familiar	Incongruent	NoFeedback	FamIncongDay1_dprime	0.489174761371057	0	0	26	15	41	79	25	1	4	0
193	192	91	Familiar	Incongruent	NoFeedback	FamIncongDay1_dprime	0.394182473532927	0	0	15	11	26	114	19	0	22	1
194	193	92	Familiar	Incongruent	NoFeedback	FamIncongDay1_dprime	0.486949104627874	1	0	25	25	50	67	20	1	60	0
195	194	93	Familiar	Incongruent	NoFeedback	FamIncongDay1_dprime	0.835016307641337	1	0	10	5	15	82	21	0	36	0
196	195	94	Familiar	Incongruent	NoFeedback	FamIncongDay1_dprime	0.363012067652596	2	1	28	11	39	86	24	1	84	0
197	196	95	Familiar	Incongruent	NoFeedback	FamIncongDay1_dprime	0.465484301453324	2	1	18	18	36	114	18	1	8	1
198	197	96	Familiar	Incongruent	NoFeedback	FamIncongDay1_dprime	1.00488596337173	3	1	17	16	33	101	31	1	144	0
199	198	97	Familiar	Incongruent	NoFeedback	FamIncongDay1_dprime	0.312029408929935	3	1	18	19	37	99	22	1	0	0
200	199	98	Familiar	Incongruent	NoFeedback	FamIncongDay1_dprime	0.594643826529957	0	0	12	10	22	84	22	0	15	0
201	200	99	Familiar	Incongruent	NoFeedback	FamIncongDay1_dprime	0.355634371564131	0	0	24	19	23	100	18	1	19	0
202	201	100	Familiar	Incongruent	NoFeedback	FamIncongDay1_dprime	0.814629991324423	1	0	25	21	46	107	20	1	36	0
203	202	101	Familiar	Incongruent	NoFeedback	FamIncongDay1_dprime	0.544454883060991	1	0	23	19	42	104	18	1	12	0
204	203	102	Familiar	Incongruent	NoFeedback	FamIncongDay1_dprime	0.564517322893009	2	1	11	9	20	86	18	1	20	0
205	204	103	Familiar	Incongruent	NoFeedback	FamIncongDay1_dprime	0.385779100991452	2	1	17	18	35	114	20	0	58	0
206	205	104	Familiar	Incongruent	NoFeedback	FamIncongDay1_dprime	0.373957037255107	3	1	13	13	26	104	20	1	0	0
207	206	105	Familiar	Incongruent	NoFeedback	FamIncongDay1_dprime	0.887770879368565	3	1	16	15	31	100	21	1	48	0
208	207	106	Familiar	Incongruent	NoFeedback	FamIncongDay1_dprime	0.141137871702135	0	0	6	2	8	88	22	1	36	0
209	208	1	Novel	Congruent	NoFeedback	NovCongDay1_dprime	0.325535158452348	0	0	18	10	28	131	23	0	84	0
210	209	2	Novel	Congruent	NoFeedback	NovCongDay1_dprime	0.726293991849891	0	0	12	10	22	111	19	0	16	0
211	210	3	Novel	Congruent	NoFeedback	NovCongDay1_dprime	0.539927109779671	1	0	10	10	20	83	19	1	1	0
212	211	4	Novel	Congruent	NoFeedback	NovCongDay1_dprime	0.638983385046015	1	0	18	13	31	105	18	0	18	0
213	212	5	Novel	Congruent	NoFeedback	NovCongDay1_dprime	0.705868829236518	2	1	22	17	39	77	20	0	27	1
214	213	6	Novel	Congruent	NoFeedback	NovCongDay1_dprime	0.593931445969882	2	1	8	18	26	105	18	1	6	0
215	214	7	Novel	Congruent	NoFeedback	NovCongDay1_dprime	0.897973465088507	1	1	19	16	35	101	18	1	12	0
216	215	8	Novel	Congruent	NoFeedback	NovCongDay1_dprime	1.07431398275596	3	1	13	12	27	101	20	1	36	0
217	216	9	Novel	Congruent	NoFeedback	NovCongDay1_dprime	0.373957037255107	0	0	14	6	20	94	22	1	0	0
218	217	10	Novel	Congruent	NoFeedback	NovCongDay1_dprime	0.499294163648321	0	0	23	13	36	106	18	1	0	0
219	218	11	Novel	Congruent	NoFeedback	NovCongDay1_dprime	0.352862694638628	3	0	20	17	37	112	18	0	0	0
220	219	12	Novel	Congruent	NoFeedback	NovCongDay1_dprime	0.301938430993554	1	0	16	15	31	101	18	1	18	0
221	220	13	Novel	Congruent	NoFeedback	NovCongDay1_dprime	0.754126093202723	2	1	12	8	20	115	23	1	72	0
222	221	14	Novel	Congruent	NoFeedback	NovCongDay1_dprime	0.643036919000173	2	1	14	13	27	104	18	1	3	0
223	222	15	Novel	Congruent	NoFeedback	NovCongDay1_dprime	0.733810722767994	3	1	13	12	25	109	20	1	0	0
224	223	16	Novel	Congruent	NoFeedback	NovCongDay1_dprime	0.886352372802899	3	1	15	4	19	77	19	0	0	0
225	224	18	Novel	Congruent	NoFeedback	NovCongDay1_dprime	0.736537711025565	0	0	12	9	21	89	18	0	15	0
226	225	19	Novel	Congruent	NoFeedback	NovCongDay1_dprime	0.221043654630777	1	0	18	15	33	101	18	1	7	0
227	226	20	Novel	Congruent	NoFeedback	NovCongDay1_dprime	0.29210462275989	1	0	20	11	31	108	19	0	30	0
228	227	21	Novel	Congruent	NoFeedback	NovCongDay1_dprime	0.835016307641337	2	1	14	9	23	81	18	1	18	0
229	228	22	Novel	Congruent	NoFeedback	NovCongDay1_dprime	0.705868829236518	2	1	15	13	28	99	18	1	8	0
230	229	23	Novel	Congruent	NoFeedback	NovCongDay1_dprime	1.06402446050012	3	1	16	12	28	102	18	1	27	0
231	230	24	Novel	Congruent	NoFeedback	NovCongDay1_dprime	0.679835997432032	3	1	15	20	35	116	23	0	81	0
232	231	25	Novel	Congruent	NoFeedback	NovCongDay1_dprime	0.918439761157612	0	0	15	11	26	113	18	1	16	0
233	232	26	Novel	Congruent	NoFeedback	NovCongDay1_dprime	0.394182473532927	0	0	12	18	30	112	18	0	20	0
234	233	27	Novel	Congruent	NoFeedback	NovCongDay1_dprime	0.584595924436997	1	0	10	8	18	101	18	1	7	0
235	234	28	Novel	Congruent	NoFeedback	NovCongDay1_dprime	0.424631689067306	1	0	9	10	19	90	18	0	8	0
236	235	29	Novel	Congruent	NoFeedback	NovCongDay1_dprime	0.466599376610143	2	1	6	5	11	98	18	1	12	0
237	236	30	Novel	Congruent	NoFeedback	NovCongDay1_dprime	0.604698825600096	2	1	13	13	26	113	20	1	36	0
238	237	31	Novel	Congruent	NoFeedback	NovCongDay1_dprime	0.456450003596174	3	1	16	7	23	96	18	1	12	0
239	238	32	Novel	Congruent	NoFeedback	NovCongDay1_dprime	0.241269090908597	3	1	15	10	25	98	18	0	16	0
240	239	33	Novel	Congruent	NoFeedback	NovCongDay1_dprime	0.448820230380452	0	0	14	13	27	95	18	1	0	0
241	240	34	Novel	Congruent	NoFeedback	NovCongDay1_dprime	0.865748632320123	0	0	13	13	26	103	18	1	24	0
242	241	35	Novel	Congruent	NoFeedback	NovCongDay1_dprime	0.57358171795215	1	0	26	23	49	95	18	1	4	0
243	242	36	Novel	Congruent	NoFeedback	NovCongDay1_dprime	0	1	0	18	15	33	101	19	1	36	0
244	243	38	Novel	Congruent	NoFeedback	NovCongDay1_dprime	0.892803148307992	2	1	16	14	30	108	19	1	0	0
245	244	39	Novel	Congruent	NoFeedback	NovCongDay1_dprime	0.723676877668344	3	1	25	15	40	112	18	1	12	0
246	245	40	Novel	Congruent	NoFeedback	NovCongDay1_dprime	0.857271778336865	3	1	8	12	20	86	20	0	36	0
247	246	41	Novel	Congruent	NoFeedback	NovCongDay1_dprime	0.223263026515611	0	0	14	11	25	94	18	0	2	0
248	247	42	Novel	Congruent	NoFeedback	NovCongDay1_dprime	0.271718306442976	0	0	13	1	14	84	20	0	48	0
249	248	43	Novel	Congruent	NoFeedback	NovCongDay1_dprime	0.897973465088507	1	0	18	7	25	119	21	1	60	0
250	249	44	Novel	Congruent	NoFeedback	NovCongDay1_dprime	0.130914845143826	1	0	21	12	33	75	18	0	24	1
251	250	45	Novel	Congruent	NoFeedback	NovCongDay1_dprime	0.608534169511636	2	1	20	21	41	84	18	1	7	0
252	251	46	Novel	Congruent	NoFeedback	NovCongDay1_dprime	0.832388625917641	2	1	21	11	32	96	19	1	0	0
253	252	47	Novel	Congruent	NoFeedback	NovCongDay1_dprime	0.583747715372911	3	1	9	8	17	93	18	1	26	0
254	253	48	Novel	Congruent	NoFeedback	NovCongDay1_dprime	0.643036919000173	3	1	13	12	25	89	20	1	13	0
255	254	49	Novel	Congruent	NoFeedback	NovCongDay1_dprime	0.634866356368611	0	0	5	0	5	78	20	1	24	0
256	255	50	Novel	Congruent	NoFeedback	NovCongDay1_dprime	0.77406137351278	0	0	18	17	35	108	18	1	6	0
257	256	51	Novel	Congruent	NoFeedback	NovCongDay1_dprime	0.71070576652449	1	0	11	8	19	98	18	1	0	0
258	257	52	Novel	Congruent	NoFeedback	NovCongDay1_dprime	0.815534256454261	1	0	18	13	31	87	18	1	0	0
259	258	53	Novel	Congruent	NoFeedback	NovCongDay1_dprime	0.322836947438676	2	1	26	23	49	95	25	1	120	0
260	259	54	Novel	Congruent	NoFeedback	NovCongDay1_dprime	0.887770879368565	2	1	12	16	28	114	18	1	6	0
261	260	55	Novel	Congruent	NoFeedback	NovCongDay1_dprime	0.604698825600096	3	1	18	15	33	84	19	1	10	0
262	261	56	Novel	Congruent	NoFeedback	NovCongDay1_dprime	0.318341983066226	2	1	13	16	29	107	19	1	36	0
263	262	57	Novel	Congruent	NoFeedback	NovCongDay1_dprime	0.814629991324423	3	1	22	20	42	101	19	1	20	0
264	263	58	Novel	Congruent	NoFeedback	NovCongDay1_dprime	0.736537711025565	0	0	16	16	32	89	25	1	72	0
265	264	59	Novel	Congruent	NoFeedback	NovCongDay1_dprime	0.486949104627874	0	0	22	16	38	131	20	1	0	0
266	265	60	Novel	Congruent	NoFeedback	NovCongDay1_dprime	0.414030677459375	1	0	23	19	42	110	19	1	32	0
267	266	61	Novel	Congruent	NoFeedback	NovCongDay1_dprime	0.746803739635247	1	0	20	23	43	104	23	1	9	0
268	267	62	Novel	Congruent	NoFeedback	NovCongDay1_dprime	0.673202944400475	3	1	14	0	14	99	45	1	300	1
269	268	63	Novel	Congruent	NoFeedback	NovCongDay1_dprime	0.466599376610143	2	1	15	12	27	93	18	1	3	0
270	269	64	Novel	Congruent	NoFeedback	NovCongDay1_dprime	0.424631689067306	3	1	17	12	29	95	21	1	52	0
271	270	65	Novel	Congruent	NoFeedback	NovCongDay1_dprime	0.695685098639547	3	1	17	19	36	97	21	0	70	0
272	271	66	Novel	Congruent	NoFeedback	NovCongDay1_dprime	0.638983385046015	0	0	20	9	29	96	18	1	3	0
273	272	67	Novel	Congruent	NoFeedback	NovCongDay1_dprime	0.669592278256359	0	0	13	16	29	108	18	0	0	0
274	273	68	Novel	Congruent	NoFeedback	NovCongDay1_dprime	0.302327199653321	1	0	23	16	39	121	18	1	6	0
275	274	69	Novel	Congruent	NoFeedback	NovCongDay1_dprime	0.705868829236518	1	0	19	20	39	80	18	0	4	0
276	275	70	Novel	Congruent	NoFeedback	NovCongDay1_dprime	0.992590449069691	2	1	16	13	29	99	18	1	12	0
277	276	71	Novel	Congruent	NoFeedback	NovCongDay1_dprime	0.550129695499614	2	1	9	10	19	96	23	1	84	0
278	277	72	Novel	Congruent	NoFeedback	NovCongDay1_dprime	0.857271778336865	3	1	23	20	43	112	19	1	18	0
279	278	73	Novel	Congruent	NoFeedback	NovCongDay1_dprime	0.489174761371057	3	1	9	14	23	124	19	1	7	0
280	279	74	Novel	Congruent	NoFeedback	NovCongDay1_dprime	0.584595924436997	0	0	27	17	44	68	19	1	20	0
281	280	75	Novel	Congruent	NoFeedback	NovCongDay1_dprime	0.408612376715927	0	0	12	19	31	124	18	1	48	0
282	281	76	Novel	Congruent	NoFeedback	NovCongDay1_dprime	0.614356608583256	1	0	9	13	22	88	20	0	60	0
283	282	77	Novel	Congruent	NoFeedback	NovCongDay1_dprime	0.352862694638628	1	0	13	18	31	122	21	0	36	0
284	283	78	Novel	Congruent	NoFeedback	NovCongDay1_dprime	0.558060236243767	2	1	4	6	10	119	31	1	168	0
285	284	79	Novel	Congruent	NoFeedback	NovCongDay1_dprime	0.266838202858734	2	1	12	14	26	91	19	1	12	0
286	285	80	Novel	Congruent	NoFeedback	NovCongDay1_dprime	0.404316318632577	3	1	12	10	22	82	20	1	6	0
287	286	81	Novel	Congruent	NoFeedback	NovCongDay1_dprime	0.618668014611285	3	1	8	10	18	83	21	1	5	0
288	287	82	Novel	Congruent	NoFeedback	NovCongDay1_dprime	0.851647914673189	0	0	7	11	18	108	24	1	84	0
289	288	83	Novel	Congruent	NoFeedback	NovCongDay1_dprime	0.721011299453607	0	0	11	3	14	83	42	1	324	1
290	289	84	Novel	Congruent	NoFeedback	NovCongDay1_dprime	0.679835997432032	1	0	24	15	39	69	24	1	48	0
291	290	85	Novel	Congruent	NoFeedback	NovCongDay1_dprime	0.764309823799693	1	0	15	4	19	119	19	1	6	0
292	291	86	Novel	Congruent	NoFeedback	NovCongDay1_dprime	0.669592278256359	2	1	16	11	27	118	19	1	13	0
293	292	87	Novel	Congruent	NoFeedback	NovCongDay1_dprime	0.550129695499614	2	1	12	15	27	89	18	0	16	0
294	293	88	Novel	Congruent	NoFeedback	NovCongDay1_dprime	0.93331180269943	3	1	26	14	40	96	21	1	60	0
295	294	89	Novel	Congruent	NoFeedback	NovCongDay1_dprime	0.373178065073357	3	1	17	18	35	102	18	0	4	0
296	295	90	Novel	Congruent	NoFeedback	NovCongDay1_dprime	0.522979333003446	0	0	26	15	41	79	25	1	4	0
297	296	91	Novel	Congruent	NoFeedback	NovCongDay1_dprime	0.211920160242126	0	0	15	11	26	114	19	0	22	1
298	297	92	Novel	Congruent	NoFeedback	NovCongDay1_dprime	0.426090722218705	1	0	25	25	50	67	20	1	60	0
299	298	93	Novel	Congruent	NoFeedback	NovCongDay1_dprime	0.462616712906138	1	0	10	5	15	82	21	0	36	0
300	299	94	Novel	Congruent	NoFeedback	NovCongDay1_dprime	0.553298499838532	2	1	28	11	39	86	24	1	84	0
301	300	95	Novel	Congruent	NoFeedback	NovCongDay1_dprime	0.638983385046015	2	1	18	18	36	114	18	1	8	1
302	301	96	Novel	Congruent	NoFeedback	NovCongDay1_dprime	0.876038154575962	3	1	17	16	33	101	31	1	144	0
303	302	97	Novel	Congruent	NoFeedback	NovCongDay1_dprime	0.653084821093133	3	1	18	19	37	99	22	1	0	0
304	303	98	Novel	Congruent	NoFeedback	NovCongDay1_dprime	0.923162429685462	0	0	12	10	22	84	22	0	15	0
305	304	99	Novel	Congruent	NoFeedback	NovCongDay1_dprime	0.394182473532927	0	0	24	19	23	100	18	1	19	0
306	305	100	Novel	Congruent	NoFeedback	NovCongDay1_dprime	0.908196041981938	1	0	25	21	46	107	20	1	36	0
307	306	101	Novel	Congruent	NoFeedback	NovCongDay1_dprime	0.332729610459621	1	0	23	19	42	104	18	1	12	0
308	307	102	Novel	Congruent	NoFeedback	NovCongDay1_dprime	0.763955339512224	2	1	11	9	20	86	18	1	20	0
309	308	103	Novel	Congruent	NoFeedback	NovCongDay1_dprime	0.628817387625254	2	1	17	18	35	114	20	0	58	0
310	309	104	Novel	Congruent	NoFeedback	NovCongDay1_dprime	0.462616712906138	3	1	13	13	26	104	20	1	0	0
311	310	105	Novel	Congruent	NoFeedback	NovCongDay1_dprime	1.01290581950442	3	1	16	15	31	100	21	1	48	0
312	311	106	Novel	Congruent	NoFeedback	NovCongDay1_dprime	0.301997285780835	0	0	6	2	8	88	22	1	36	0
313	312	1	Novel	Incongruent	NoFeedback	NovIncongDay1_dprime	0.231267528388832	0	0	18	10	28	131	23	0	84	0
314	313	2	Novel	Incongruent	NoFeedback	NovIncongDay1_dprime	0.77774761584384	0	0	12	10	22	111	19	0	16	0
315	314	3	Novel	Incongruent	NoFeedback	NovIncongDay1_dprime	0.57358171795215	1	0	10	10	20	83	19	1	1	0
316	315	4	Novel	Incongruent	NoFeedback	NovIncongDay1_dprime	0.466599376610143	1	0	18	13	31	105	18	0	18	0
317	316	5	Novel	Incongruent	NoFeedback	NovIncongDay1_dprime	0.908196041981938	2	1	22	17	39	77	20	0	27	1
318	317	6	Novel	Incongruent	NoFeedback	NovIncongDay1_dprime	0.394182473532927	2	1	8	18	26	105	18	1	6	0
319	318	7	Novel	Incongruent	NoFeedback	NovIncongDay1_dprime	0.774512409519636	1	1	19	16	35	101	18	1	12	0
320	319	8	Novel	Incongruent	NoFeedback	NovIncongDay1_dprime	0.902909182308548	3	1	13	12	27	101	20	1	36	0
321	320	9	Novel	Incongruent	NoFeedback	NovIncongDay1_dprime	0.221212529318694	0	0	14	6	20	94	22	1	0	0
322	321	10	Novel	Incongruent	NoFeedback	NovIncongDay1_dprime	0.716071414956461	0	0	23	13	36	106	18	1	0	0
323	322	11	Novel	Incongruent	NoFeedback	NovIncongDay1_dprime	0.414465691646545	3	0	20	17	37	112	18	0	0	0
324	323	12	Novel	Incongruent	NoFeedback	NovIncongDay1_dprime	0.512896849952875	1	0	16	15	31	101	18	1	18	0
325	324	13	Novel	Incongruent	NoFeedback	NovIncongDay1_dprime	0.563432344938182	2	1	12	8	20	115	23	1	72	0
326	325	14	Novel	Incongruent	NoFeedback	NovIncongDay1_dprime	0.594643826529957	2	1	14	13	27	104	18	1	3	0
327	326	15	Novel	Incongruent	NoFeedback	NovIncongDay1_dprime	0.784734986413067	3	1	13	12	25	109	20	1	0	0
328	327	16	Novel	Incongruent	NoFeedback	NovIncongDay1_dprime	0.825848474681199	3	1	15	4	19	77	19	0	0	0
329	328	18	Novel	Incongruent	NoFeedback	NovIncongDay1_dprime	1.02554031732448	0	0	12	9	21	89	18	0	15	0
330	329	19	Novel	Incongruent	NoFeedback	NovIncongDay1_dprime	0.28168518361664	1	0	18	15	33	101	18	1	7	0
331	330	20	Novel	Incongruent	NoFeedback	NovIncongDay1_dprime	0.393564381390271	1	0	20	11	31	108	19	0	30	0
332	331	21	Novel	Incongruent	NoFeedback	NovIncongDay1_dprime	0.794978705588741	2	1	14	9	23	81	18	1	18	0
333	332	22	Novel	Incongruent	NoFeedback	NovIncongDay1_dprime	0.743960095781962	2	1	15	13	28	99	18	1	8	0
334	333	23	Novel	Incongruent	NoFeedback	NovIncongDay1_dprime	1.00488596337173	3	1	16	12	28	102	18	1	27	0
335	334	24	Novel	Incongruent	NoFeedback	NovIncongDay1_dprime	0.634866356368611	3	1	15	20	35	116	23	0	81	0
336	335	25	Novel	Incongruent	NoFeedback	NovIncongDay1_dprime	0.690102026041714	0	0	15	11	26	113	18	1	16	0
337	336	26	Novel	Incongruent	NoFeedback	NovIncongDay1_dprime	0.614356608583256	0	0	12	18	30	112	18	0	20	0
338	337	27	Novel	Incongruent	NoFeedback	NovIncongDay1_dprime	0.57821500267655	1	0	10	8	18	101	18	1	7	0
339	338	28	Novel	Incongruent	NoFeedback	NovIncongDay1_dprime	0.754126093202723	1	0	9	10	19	90	18	0	8	0
340	339	29	Novel	Incongruent	NoFeedback	NovIncongDay1_dprime	0.713557475391079	2	1	6	5	11	98	18	1	12	0
341	340	30	Novel	Incongruent	NoFeedback	NovIncongDay1_dprime	0.655116480827904	2	1	13	13	26	113	20	1	36	0
342	341	31	Novel	Incongruent	NoFeedback	NovIncongDay1_dprime	0.271579149616084	3	1	16	7	23	96	18	1	12	0
343	342	32	Novel	Incongruent	NoFeedback	NovIncongDay1_dprime	0.0407016867516428	3	1	15	10	25	98	18	0	16	0
344	343	33	Novel	Incongruent	NoFeedback	NovIncongDay1_dprime	0.438757106143249	0	0	14	13	27	95	18	1	0	0
345	344	34	Novel	Incongruent	NoFeedback	NovIncongDay1_dprime	0.583747715372911	0	0	13	13	26	103	18	1	24	0
346	345	35	Novel	Incongruent	NoFeedback	NovIncongDay1_dprime	0.716071414956461	1	0	26	23	49	95	18	1	4	0
347	346	36	Novel	Incongruent	NoFeedback	NovIncongDay1_dprime	0.221212529318694	1	0	18	15	33	101	19	1	36	0
348	347	38	Novel	Incongruent	NoFeedback	NovIncongDay1_dprime	0.837018530959951	2	1	16	14	30	108	19	1	0	0
349	348	39	Novel	Incongruent	NoFeedback	NovIncongDay1_dprime	0.716071414956461	3	1	25	15	40	112	18	1	12	0
350	349	40	Novel	Incongruent	NoFeedback	NovIncongDay1_dprime	0.784180775790044	3	1	8	12	20	86	20	0	36	0
351	350	41	Novel	Incongruent	NoFeedback	NovIncongDay1_dprime	0.328374716631005	0	0	14	11	25	94	18	0	2	0
352	351	42	Novel	Incongruent	NoFeedback	NovIncongDay1_dprime	0.44501800538422	0	0	13	1	14	84	20	0	48	0
353	352	43	Novel	Incongruent	NoFeedback	NovIncongDay1_dprime	1.03329213582133	1	0	18	7	25	119	21	1	60	0
354	353	44	Novel	Incongruent	NoFeedback	NovIncongDay1_dprime	0.398575603436162	1	0	21	12	33	75	18	0	24	1
355	354	45	Novel	Incongruent	NoFeedback	NovIncongDay1_dprime	0.434815419664277	2	1	20	21	41	84	18	1	7	0
356	355	46	Novel	Incongruent	NoFeedback	NovIncongDay1_dprime	0.881738043757882	2	1	21	11	32	96	19	1	0	0
357	356	47	Novel	Incongruent	NoFeedback	NovIncongDay1_dprime	0.716071414956461	3	1	9	8	17	93	18	1	26	0
358	357	48	Novel	Incongruent	NoFeedback	NovIncongDay1_dprime	0.655116480827904	3	1	13	12	25	89	20	1	13	0
359	358	49	Novel	Incongruent	NoFeedback	NovIncongDay1_dprime	0.560352272393045	0	0	5	0	5	78	20	1	24	0
360	359	50	Novel	Incongruent	NoFeedback	NovIncongDay1_dprime	0.628817387625254	0	0	18	17	35	108	18	1	6	0
361	360	51	Novel	Incongruent	NoFeedback	NovIncongDay1_dprime	0.794978705588741	1	0	11	8	19	98	18	1	0	0
362	361	52	Novel	Incongruent	NoFeedback	NovIncongDay1_dprime	0.669592278256359	1	0	18	13	31	87	18	1	0	0
363	362	53	Novel	Incongruent	NoFeedback	NovIncongDay1_dprime	0.767407480118023	2	1	26	23	49	95	25	1	120	0
364	363	54	Novel	Incongruent	NoFeedback	NovIncongDay1_dprime	1.01290581950442	2	1	12	16	28	114	18	1	6	0
365	364	55	Novel	Incongruent	NoFeedback	NovIncongDay1_dprime	0.675369728204818	3	1	18	15	33	84	19	1	10	0
366	365	56	Novel	Incongruent	NoFeedback	NovIncongDay1_dprime	0.656148979375354	2	1	13	16	29	107	19	1	36	0
367	366	57	Novel	Incongruent	NoFeedback	NovIncongDay1_dprime	0.563432344938182	3	1	22	20	42	101	19	1	20	0
368	367	58	Novel	Incongruent	NoFeedback	NovIncongDay1_dprime	0.669592278256359	0	0	16	16	32	89	25	1	72	0
369	368	59	Novel	Incongruent	NoFeedback	NovIncongDay1_dprime	0.550129695499614	0	0	22	16	38	131	20	1	0	0
370	369	60	Novel	Incongruent	NoFeedback	NovIncongDay1_dprime	0.550129695499614	1	0	23	19	42	110	19	1	32	0
371	370	61	Novel	Incongruent	NoFeedback	NovIncongDay1_dprime	0.426090722218705	1	0	20	23	43	104	23	1	9	0
372	371	62	Novel	Incongruent	NoFeedback	NovIncongDay1_dprime	0.902909182308548	3	1	14	0	14	99	45	1	300	1
373	372	63	Novel	Incongruent	NoFeedback	NovIncongDay1_dprime	0.618668014611285	2	1	15	12	27	93	18	1	3	0
374	373	64	Novel	Incongruent	NoFeedback	NovIncongDay1_dprime	0.649167115642985	3	1	17	12	29	95	21	1	52	0
375	374	65	Novel	Incongruent	NoFeedback	NovIncongDay1_dprime	0.522979333003446	3	1	17	19	36	97	21	0	70	0
376	375	66	Novel	Incongruent	NoFeedback	NovIncongDay1_dprime	0.913028584585812	0	0	20	9	29	96	18	1	3	0
377	376	67	Novel	Incongruent	NoFeedback	NovIncongDay1_dprime	0.825848474681199	0	0	13	16	29	108	18	0	0	0
378	377	68	Novel	Incongruent	NoFeedback	NovIncongDay1_dprime	0.628817387625254	1	0	23	16	39	121	18	1	6	0
379	378	69	Novel	Incongruent	NoFeedback	NovIncongDay1_dprime	0.784734986413067	1	0	19	20	39	80	18	0	4	0
380	379	70	Novel	Incongruent	NoFeedback	NovIncongDay1_dprime	0.974086693330535	2	1	16	13	29	99	18	1	12	0
381	380	71	Novel	Incongruent	NoFeedback	NovIncongDay1_dprime	0.675369728204818	2	1	9	10	19	96	23	1	84	0
382	381	72	Novel	Incongruent	NoFeedback	NovIncongDay1_dprime	0.271579149616084	3	1	23	20	43	112	19	1	18	0
383	382	73	Novel	Incongruent	NoFeedback	NovIncongDay1_dprime	0.352862694638628	3	1	9	14	23	124	19	1	7	0
384	383	74	Novel	Incongruent	NoFeedback	NovIncongDay1_dprime	0.111532042012592	0	0	27	17	44	68	19	1	20	0
385	384	75	Novel	Incongruent	NoFeedback	NovIncongDay1_dprime	0.512896849952875	0	0	12	19	31	124	18	1	48	0
386	385	76	Novel	Incongruent	NoFeedback	NovIncongDay1_dprime	0.805244734198423	1	0	9	13	22	88	20	0	60	0
387	386	77	Novel	Incongruent	NoFeedback	NovIncongDay1_dprime	0.638983385046015	1	0	13	18	31	122	21	0	36	0
388	387	78	Novel	Incongruent	NoFeedback	NovIncongDay1_dprime	0.42870210707311	2	1	4	6	10	119	31	1	168	0
389	388	79	Novel	Incongruent	NoFeedback	NovIncongDay1_dprime	0.766497974569044	2	1	12	14	26	91	19	1	12	0
390	389	80	Novel	Incongruent	NoFeedback	NovIncongDay1_dprime	0.313542514864756	3	1	12	10	22	82	20	1	6	0
391	390	81	Novel	Incongruent	NoFeedback	NovIncongDay1_dprime	0.519577381761939	3	1	8	10	18	83	21	1	5	0
392	391	82	Novel	Incongruent	NoFeedback	NovIncongDay1_dprime	0.623291035039966	0	0	7	11	18	108	24	1	84	0
393	392	83	Novel	Incongruent	NoFeedback	NovIncongDay1_dprime	0.76216653308841	0	0	11	3	14	83	42	1	324	1
394	393	84	Novel	Incongruent	NoFeedback	NovIncongDay1_dprime	0.669592278256359	1	0	24	15	39	69	24	1	48	0
395	394	85	Novel	Incongruent	NoFeedback	NovIncongDay1_dprime	0.784734986413067	1	0	15	4	19	119	19	1	6	0
396	395	86	Novel	Incongruent	NoFeedback	NovIncongDay1_dprime	0.877587148771594	2	1	16	11	27	118	19	1	13	0
397	396	87	Novel	Incongruent	NoFeedback	NovIncongDay1_dprime	0.659369701362928	2	1	12	15	27	89	18	0	16	0
398	397	88	Novel	Incongruent	NoFeedback	NovIncongDay1_dprime	0.643345405392917	3	1	26	14	40	96	21	1	60	0
399	398	89	Novel	Incongruent	NoFeedback	NovIncongDay1_dprime	0.618668014611285	3	1	17	18	35	102	18	0	4	0
400	399	90	Novel	Incongruent	NoFeedback	NovIncongDay1_dprime	0.130517797131659	0	0	26	15	41	79	25	1	4	0
401	400	91	Novel	Incongruent	NoFeedback	NovIncongDay1_dprime	0.527894210843465	0	0	15	11	26	114	19	0	22	1
402	401	92	Novel	Incongruent	NoFeedback	NovIncongDay1_dprime	0.342640117745197	1	0	25	25	50	67	20	1	60	0
403	402	93	Novel	Incongruent	NoFeedback	NovIncongDay1_dprime	0.683275227782686	1	0	10	5	15	82	21	0	36	0
404	403	94	Novel	Incongruent	NoFeedback	NovIncongDay1_dprime	0.628817387625254	2	1	28	11	39	86	24	1	84	0
405	404	95	Novel	Incongruent	NoFeedback	NovIncongDay1_dprime	0.736537711025565	2	1	18	18	36	114	18	1	8	1
406	405	96	Novel	Incongruent	NoFeedback	NovIncongDay1_dprime	0.938995312023132	3	1	17	16	33	101	31	1	144	0
407	406	97	Novel	Incongruent	NoFeedback	NovIncongDay1_dprime	0.397455485292592	3	1	18	19	37	99	22	1	0	0
408	407	98	Novel	Incongruent	NoFeedback	NovIncongDay1_dprime	0.992590449069691	0	0	12	10	22	84	22	0	15	0
409	408	99	Novel	Incongruent	NoFeedback	NovIncongDay1_dprime	0.448820230380452	0	0	24	19	23	100	18	1	19	0
410	409	100	Novel	Incongruent	NoFeedback	NovIncongDay1_dprime	0.824813721921394	1	0	25	21	46	107	20	1	36	0
411	410	101	Novel	Incongruent	NoFeedback	NovIncongDay1_dprime	0.492480070141958	1	0	23	19	42	104	18	1	12	0
412	411	102	Novel	Incongruent	NoFeedback	NovIncongDay1_dprime	0.763955339512224	2	1	11	9	20	86	18	1	20	0
413	412	103	Novel	Incongruent	NoFeedback	NovIncongDay1_dprime	0.984330412506209	2	1	17	18	35	114	20	0	58	0
414	413	104	Novel	Incongruent	NoFeedback	NovIncongDay1_dprime	0.563432344938182	3	1	13	13	26	104	20	1	0	0
415	414	105	Novel	Incongruent	NoFeedback	NovIncongDay1_dprime	1.06402446050012	3	1	16	15	31	100	21	1	48	0
416	415	106	Novel	Incongruent	NoFeedback	NovIncongDay1_dprime	0.325535158452348	0	0	6	2	8	88	22	1	36	0
417	416	1	Familiar	Congruent	Feedback	FamCongDay2_dprime	0.754126093202723	0	0	18	10	28	131	23	0	84	0
418	417	2	Familiar	Congruent	Feedback	FamCongDay2_dprime	0.938995312023132	0	0	12	10	22	111	19	0	16	0
419	418	3	Familiar	Congruent	Feedback	FamCongDay2_dprime	0.54848775550938	1	0	10	10	20	83	19	1	1	0
420	419	4	Familiar	Congruent	Feedback	FamCongDay2_dprime	0.723676877668344	1	0	18	13	31	105	18	0	18	0
421	420	5	Familiar	Congruent	Feedback	FamCongDay2_dprime	0.77774761584384	2	1	22	17	39	77	20	0	27	1
422	421	6	Familiar	Congruent	Feedback	FamCongDay2_dprime	0.527884015026604	2	1	8	18	26	105	18	1	6	0
423	422	7	Familiar	Congruent	Feedback	FamCongDay2_dprime	0.614356608583256	1	1	19	16	35	101	18	1	12	0
424	423	8	Familiar	Congruent	Feedback	FamCongDay2_dprime	0.887770879368565	3	1	13	12	27	101	20	1	36	0
425	424	9	Familiar	Congruent	Feedback	FamCongDay2_dprime	0.180869551584597	0	0	14	6	20	94	22	1	0	0
426	425	10	Familiar	Congruent	Feedback	FamCongDay2_dprime	0.938995312023132	0	0	23	13	36	106	18	1	0	0
427	426	11	Familiar	Congruent	Feedback	FamCongDay2_dprime	0.690102026041714	3	0	20	17	37	112	18	0	0	0
428	427	12	Familiar	Congruent	Feedback	FamCongDay2_dprime	0.825848474681199	1	0	16	15	31	101	18	1	18	0
429	428	13	Familiar	Congruent	Feedback	FamCongDay2_dprime	0.669592278256359	2	1	12	8	20	115	23	1	72	0
430	429	14	Familiar	Congruent	Feedback	FamCongDay2_dprime	0.57358171795215	2	1	14	13	27	104	18	1	3	0
431	430	15	Familiar	Congruent	Feedback	FamCongDay2_dprime	0.342640117745197	3	1	13	12	25	109	20	1	0	0
432	431	16	Familiar	Congruent	Feedback	FamCongDay2_dprime	0.757093261891085	3	1	15	4	19	77	19	0	0	0
433	432	18	Familiar	Congruent	Feedback	FamCongDay2_dprime	0.836188610407016	0	0	12	9	21	89	18	0	15	0
434	433	19	Familiar	Congruent	Feedback	FamCongDay2_dprime	0.151739895677117	1	0	18	15	33	101	18	1	7	0
435	434	20	Familiar	Congruent	Feedback	FamCongDay2_dprime	0.373372442423983	1	0	20	11	31	108	19	0	30	0
436	435	21	Familiar	Congruent	Feedback	FamCongDay2_dprime	0.517617986416921	2	1	14	9	23	81	18	1	18	0
437	436	22	Familiar	Congruent	Feedback	FamCongDay2_dprime	0.690102026041714	2	1	15	13	28	99	18	1	8	0
438	437	23	Familiar	Congruent	Feedback	FamCongDay2_dprime	1.02554031732448	3	1	16	12	28	102	18	1	27	0
439	438	24	Familiar	Congruent	Feedback	FamCongDay2_dprime	0.403786958283702	3	1	15	20	35	116	23	0	81	0
440	439	25	Familiar	Congruent	Feedback	FamCongDay2_dprime	0.805244734198423	0	0	15	11	26	113	18	1	16	0
441	440	26	Familiar	Congruent	Feedback	FamCongDay2_dprime	0.669592278256359	0	0	12	18	30	112	18	0	20	0
442	441	27	Familiar	Congruent	Feedback	FamCongDay2_dprime	0.867421151350833	1	0	10	8	18	101	18	1	7	0
443	442	28	Familiar	Congruent	Feedback	FamCongDay2_dprime	0.705868829236518	1	0	9	10	19	90	18	0	8	0
444	443	29	Familiar	Congruent	Feedback	FamCongDay2_dprime	0.886352372802899	2	1	6	5	11	98	18	1	12	0
445	444	30	Familiar	Congruent	Feedback	FamCongDay2_dprime	0.943477800120191	2	1	13	13	26	113	20	1	36	0
446	445	31	Familiar	Congruent	Feedback	FamCongDay2_dprime	0.618668014611285	3	1	16	7	23	96	18	1	12	0
447	446	32	Familiar	Congruent	Feedback	FamCongDay2_dprime	0.271579149616084	3	1	15	10	25	98	18	0	16	0
448	447	33	Familiar	Congruent	Feedback	FamCongDay2_dprime	0.43619675621926	0	0	14	13	27	95	18	1	0	0
449	448	34	Familiar	Congruent	Feedback	FamCongDay2_dprime	0.94930953025007	0	0	13	13	26	103	18	1	24	0
450	449	35	Familiar	Congruent	Feedback	FamCongDay2_dprime	0.757093261891085	1	0	26	23	49	95	18	1	4	0
451	450	36	Familiar	Congruent	Feedback	FamCongDay2_dprime	0.20086744102294	1	0	18	15	33	101	19	1	36	0
452	451	38	Familiar	Congruent	Feedback	FamCongDay2_dprime	0.974086693330535	2	1	16	14	30	108	19	1	0	0
453	452	39	Familiar	Congruent	Feedback	FamCongDay2_dprime	0.94930953025007	3	1	25	15	40	112	18	1	12	0
454	453	40	Familiar	Congruent	Feedback	FamCongDay2_dprime	0.726293991849891	3	1	8	12	20	86	20	0	36	0
455	454	41	Familiar	Congruent	Feedback	FamCongDay2_dprime	0.293463913320768	0	0	14	11	25	94	18	0	2	0
456	455	42	Familiar	Congruent	Feedback	FamCongDay2_dprime	0.679835997432032	0	0	13	1	14	84	20	0	48	0
457	456	43	Familiar	Congruent	Feedback	FamCongDay2_dprime	0.918439761157612	1	0	18	7	25	119	21	1	60	0
458	457	44	Familiar	Congruent	Feedback	FamCongDay2_dprime	0.57358171795215	1	0	21	12	33	75	18	0	24	1
459	458	45	Familiar	Congruent	Feedback	FamCongDay2_dprime	0.301938430993554	2	1	20	21	41	84	18	1	7	0
460	459	46	Familiar	Congruent	Feedback	FamCongDay2_dprime	0.938995312023132	2	1	21	11	32	96	19	1	0	0
461	460	47	Familiar	Congruent	Feedback	FamCongDay2_dprime	0.543179097561268	3	1	9	8	17	93	18	1	26	0
462	461	48	Familiar	Congruent	Feedback	FamCongDay2_dprime	0.705868829236518	3	1	13	12	25	89	20	1	13	0
463	462	49	Familiar	Congruent	Feedback	FamCongDay2_dprime	0.825848474681199	0	0	5	0	5	78	20	1	24	0
464	463	50	Familiar	Congruent	Feedback	FamCongDay2_dprime	0.733810722767994	0	0	18	17	35	108	18	1	6	0
465	464	51	Familiar	Congruent	Feedback	FamCongDay2_dprime	0.591151542434238	1	0	11	8	19	98	18	1	0	0
466	465	52	Familiar	Congruent	Feedback	FamCongDay2_dprime	0.716071414956461	1	0	18	13	31	87	18	1	0	0
467	466	53	Familiar	Congruent	Feedback	FamCongDay2_dprime	0.665810232577205	2	1	26	23	49	95	25	1	120	0
468	467	54	Familiar	Congruent	Feedback	FamCongDay2_dprime	0.855482603710441	2	1	12	16	28	114	18	1	6	0
469	468	55	Familiar	Congruent	Feedback	FamCongDay2_dprime	0.593931445969882	3	1	18	15	33	84	19	1	10	0
470	469	56	Familiar	Congruent	Feedback	FamCongDay2_dprime	0.543179097561268	2	1	13	16	29	107	19	1	36	0
471	470	57	Familiar	Congruent	Feedback	FamCongDay2_dprime	0.764309823799693	3	1	22	20	42	101	19	1	20	0
472	471	58	Familiar	Congruent	Feedback	FamCongDay2_dprime	0.876038154575962	0	0	16	16	32	89	25	1	72	0
473	472	59	Familiar	Congruent	Feedback	FamCongDay2_dprime	0.373372442423983	0	0	22	16	38	131	20	1	0	0
474	473	60	Familiar	Congruent	Feedback	FamCongDay2_dprime	0.35378082364727	1	0	23	19	42	110	19	1	32	0
475	474	61	Familiar	Congruent	Feedback	FamCongDay2_dprime	0.736537711025565	1	0	20	23	43	104	23	1	9	0
476	475	62	Familiar	Congruent	Feedback	FamCongDay2_dprime	0.774512409519636	3	1	14	0	14	99	45	1	300	1
477	476	63	Familiar	Congruent	Feedback	FamCongDay2_dprime	0.527884015026604	2	1	15	12	27	93	18	1	3	0
478	477	64	Familiar	Congruent	Feedback	FamCongDay2_dprime	0.352862694638628	3	1	17	12	29	95	21	1	52	0
479	478	65	Familiar	Congruent	Feedback	FamCongDay2_dprime	0.845238884534768	3	1	17	19	36	97	21	0	70	0
480	479	66	Familiar	Congruent	Feedback	FamCongDay2_dprime	0.784180775790044	0	0	20	9	29	96	18	1	3	0
481	480	67	Familiar	Congruent	Feedback	FamCongDay2_dprime	0.746803739635247	0	0	13	16	29	108	18	0	0	0
482	481	68	Familiar	Congruent	Feedback	FamCongDay2_dprime	0.887770879368565	1	0	23	16	39	121	18	1	6	0
483	482	69	Familiar	Congruent	Feedback	FamCongDay2_dprime	0.805244734198423	1	0	19	20	39	80	18	0	4	0
484	483	70	Familiar	Congruent	Feedback	FamCongDay2_dprime	1.0846282009829	2	1	16	13	29	99	18	1	12	0
485	484	71	Familiar	Congruent	Feedback	FamCongDay2_dprime	0.887770879368565	2	1	9	10	19	96	23	1	84	0
486	485	72	Familiar	Congruent	Feedback	FamCongDay2_dprime	0.313542514864756	3	1	23	20	43	112	19	1	18	0
487	486	73	Familiar	Congruent	Feedback	FamCongDay2_dprime	0	3	1	9	14	23	124	19	1	7	0
488	487	74	Familiar	Congruent	Feedback	FamCongDay2_dprime	0.41865420498015	0	0	27	17	44	68	19	1	20	0
489	488	75	Familiar	Congruent	Feedback	FamCongDay2_dprime	0.723676877668344	0	0	12	19	31	124	18	1	48	0
490	489	76	Familiar	Congruent	Feedback	FamCongDay2_dprime	1.09496833670871	1	0	9	13	22	88	20	0	60	0
491	490	77	Familiar	Congruent	Feedback	FamCongDay2_dprime	0.393976182906759	1	0	13	18	31	122	21	0	36	0
492	491	78	Familiar	Congruent	Feedback	FamCongDay2_dprime	0.938995312023132	2	1	4	6	10	119	31	1	168	0
493	492	79	Familiar	Congruent	Feedback	FamCongDay2_dprime	0.564517322893009	2	1	12	14	26	91	19	1	12	0
494	493	80	Familiar	Congruent	Feedback	FamCongDay2_dprime	0.322503413261158	3	1	12	10	22	82	20	1	6	0
495	494	81	Familiar	Congruent	Feedback	FamCongDay2_dprime	0.352862694638628	3	1	8	10	18	83	21	1	5	0
496	495	82	Familiar	Congruent	Feedback	FamCongDay2_dprime	0.716071414956461	0	0	7	11	18	108	24	1	84	0
497	496	83	Familiar	Congruent	Feedback	FamCongDay2_dprime	0.781425821843958	0	0	11	3	14	83	42	1	324	1
498	497	84	Familiar	Congruent	Feedback	FamCongDay2_dprime	0.736537711025565	1	0	24	15	39	69	24	1	48	0
499	498	85	Familiar	Congruent	Feedback	FamCongDay2_dprime	0.918439761157612	1	0	15	4	19	119	19	1	6	0
500	499	86	Familiar	Congruent	Feedback	FamCongDay2_dprime	0.784734986413067	2	1	16	11	27	118	19	1	13	0
501	500	87	Familiar	Congruent	Feedback	FamCongDay2_dprime	0.0402078536645249	2	1	12	15	27	89	18	0	16	0
502	501	88	Familiar	Congruent	Feedback	FamCongDay2_dprime	0.690102026041714	3	1	26	14	40	96	21	1	60	0
503	502	89	Familiar	Congruent	Feedback	FamCongDay2_dprime	0.342640117745197	3	1	17	18	35	102	18	0	4	0
504	503	90	Familiar	Congruent	Feedback	FamCongDay2_dprime	0.322503413261158	0	0	26	15	41	79	25	1	4	0
505	504	91	Familiar	Congruent	Feedback	FamCongDay2_dprime	0.499294163648321	0	0	15	11	26	114	19	0	22	1
506	505	92	Familiar	Congruent	Feedback	FamCongDay2_dprime	0.403786958283702	1	0	25	25	50	67	20	1	60	0
507	506	93	Familiar	Congruent	Feedback	FamCongDay2_dprime	0.679835997432032	1	0	10	5	15	82	21	0	36	0
508	507	94	Familiar	Congruent	Feedback	FamCongDay2_dprime	0.757093261891085	2	1	28	11	39	86	24	1	84	0
509	508	95	Familiar	Congruent	Feedback	FamCongDay2_dprime	0.455240582277651	2	1	18	18	36	114	18	1	8	1
510	509	96	Familiar	Congruent	Feedback	FamCongDay2_dprime	0.984330412506209	3	1	17	16	33	101	31	1	144	0
511	510	97	Familiar	Congruent	Feedback	FamCongDay2_dprime	0.608534169511636	3	1	18	19	37	99	22	1	0	0
512	511	98	Familiar	Congruent	Feedback	FamCongDay2_dprime	0.918439761157612	0	0	12	10	22	84	22	0	15	0
513	512	99	Familiar	Congruent	Feedback	FamCongDay2_dprime	0.170763517584041	0	0	24	19	23	100	18	1	19	0
514	513	100	Familiar	Congruent	Feedback	FamCongDay2_dprime	1.00488596337173	1	0	25	21	46	107	20	1	36	0
515	514	101	Familiar	Congruent	Feedback	FamCongDay2_dprime	0.653084821093133	1	0	23	19	42	104	18	1	12	0
516	515	102	Familiar	Congruent	Feedback	FamCongDay2_dprime	0.886352372802899	2	1	11	9	20	86	18	1	20	0
517	516	103	Familiar	Congruent	Feedback	FamCongDay2_dprime	0.824813721921394	2	1	17	18	35	114	20	0	58	0
518	517	104	Familiar	Congruent	Feedback	FamCongDay2_dprime	0.624600327758929	3	1	13	13	26	104	20	1	0	0
519	518	105	Familiar	Congruent	Feedback	FamCongDay2_dprime	0.705868829236518	3	1	16	15	31	100	21	1	48	0
520	519	106	Familiar	Congruent	Feedback	FamCongDay2_dprime	0.558060236243767	0	0	6	2	8	88	22	1	36	0
521	520	1	Familiar	Incongruent	Feedback	FamIncongDay2_dprime	0.231149688631333	0	0	18	10	28	131	23	0	84	0
522	521	2	Familiar	Incongruent	Feedback	FamIncongDay2_dprime	0.886352372802899	0	0	12	10	22	111	19	0	16	0
523	522	3	Familiar	Incongruent	Feedback	FamIncongDay2_dprime	0.659369701362928	1	0	10	10	20	83	19	1	1	0
524	523	4	Familiar	Incongruent	Feedback	FamIncongDay2_dprime	0.486039852318845	1	0	18	13	31	105	18	0	18	0
525	524	5	Familiar	Incongruent	Feedback	FamIncongDay2_dprime	0.517617986416921	2	1	22	17	39	77	20	0	27	1
526	525	6	Familiar	Incongruent	Feedback	FamIncongDay2_dprime	0.455240582277651	2	1	8	18	26	105	18	1	6	0
527	526	7	Familiar	Incongruent	Feedback	FamIncongDay2_dprime	0.604134031689825	1	1	19	16	35	101	18	1	12	0
528	527	8	Familiar	Incongruent	Feedback	FamIncongDay2_dprime	1.04351471271477	3	1	13	12	27	101	20	1	36	0
529	528	9	Familiar	Incongruent	Feedback	FamIncongDay2_dprime	0.0906817869323937	0	0	14	6	20	94	22	1	0	0
530	529	10	Familiar	Incongruent	Feedback	FamIncongDay2_dprime	0.746803739635247	0	0	23	13	36	106	18	1	0	0
531	530	11	Familiar	Incongruent	Feedback	FamIncongDay2_dprime	0.550129695499614	3	0	20	17	37	112	18	0	0	0
532	531	12	Familiar	Incongruent	Feedback	FamIncongDay2_dprime	0.94930953025007	1	0	16	15	31	101	18	1	18	0
533	532	13	Familiar	Incongruent	Feedback	FamIncongDay2_dprime	0.685519101218786	2	1	12	8	20	115	23	1	72	0
534	533	14	Familiar	Incongruent	Feedback	FamIncongDay2_dprime	0.539927109779671	2	1	14	13	27	104	18	1	3	0
535	534	15	Familiar	Incongruent	Feedback	FamIncongDay2_dprime	0.736537711025565	3	1	13	12	25	109	20	1	0	0
536	535	16	Familiar	Incongruent	Feedback	FamIncongDay2_dprime	0.886352372802899	3	1	15	4	19	77	19	0	0	0
537	536	18	Familiar	Incongruent	Feedback	FamIncongDay2_dprime	0.836188610407016	0	0	12	9	21	89	18	0	15	0
538	537	19	Familiar	Incongruent	Feedback	FamIncongDay2_dprime	0.507374267241248	1	0	18	15	33	101	18	1	7	0
539	538	20	Familiar	Incongruent	Feedback	FamIncongDay2_dprime	0.465484301453324	1	0	20	11	31	108	19	0	30	0
540	539	21	Familiar	Incongruent	Feedback	FamIncongDay2_dprime	0.434815419664277	2	1	14	9	23	81	18	1	18	0
541	540	22	Familiar	Incongruent	Feedback	FamIncongDay2_dprime	0.71070576652449	2	1	15	13	28	99	18	1	8	0
542	541	23	Familiar	Incongruent	Feedback	FamIncongDay2_dprime	1.09496833670871	3	1	16	12	28	102	18	1	27	0
543	542	24	Familiar	Incongruent	Feedback	FamIncongDay2_dprime	0.475750330063006	3	1	15	20	35	116	23	0	81	0
544	543	25	Familiar	Incongruent	Feedback	FamIncongDay2_dprime	0.938995312023132	0	0	15	11	26	113	18	1	16	0
545	544	26	Familiar	Incongruent	Feedback	FamIncongDay2_dprime	0.180869551584597	0	0	12	18	30	112	18	0	20	0
546	545	27	Familiar	Incongruent	Feedback	FamIncongDay2_dprime	0.628817387625254	1	0	10	8	18	101	18	1	7	0
547	546	28	Familiar	Incongruent	Feedback	FamIncongDay2_dprime	0.726293991849891	1	0	9	10	19	90	18	0	8	0
548	547	29	Familiar	Incongruent	Feedback	FamIncongDay2_dprime	0.908196041981938	2	1	6	5	11	98	18	1	12	0
549	548	30	Familiar	Incongruent	Feedback	FamIncongDay2_dprime	0.509428008747971	2	1	13	13	26	113	20	1	36	0
550	549	31	Familiar	Incongruent	Feedback	FamIncongDay2_dprime	0.835016307641337	3	1	16	7	23	96	18	1	12	0
551	550	32	Familiar	Incongruent	Feedback	FamIncongDay2_dprime	0.0810345960170071	3	1	15	10	25	98	18	0	16	0
552	551	33	Familiar	Incongruent	Feedback	FamIncongDay2_dprime	0.543179097561268	0	0	14	13	27	95	18	1	0	0
553	552	34	Familiar	Incongruent	Feedback	FamIncongDay2_dprime	0.705868829236518	0	0	13	13	26	103	18	1	24	0
554	553	35	Familiar	Incongruent	Feedback	FamIncongDay2_dprime	1.01520018159867	1	0	26	23	49	95	18	1	4	0
555	554	36	Familiar	Incongruent	Feedback	FamIncongDay2_dprime	0.0301447294273214	1	0	18	15	33	101	19	1	36	0
556	555	38	Familiar	Incongruent	Feedback	FamIncongDay2_dprime	0.794314620889694	2	1	16	14	30	108	19	1	0	0
557	556	39	Familiar	Incongruent	Feedback	FamIncongDay2_dprime	0.784734986413067	3	1	25	15	40	112	18	1	12	0
558	557	40	Familiar	Incongruent	Feedback	FamIncongDay2_dprime	0.918439761157612	3	1	8	12	20	86	20	0	36	0
559	558	41	Familiar	Incongruent	Feedback	FamIncongDay2_dprime	0.23197755576204	0	0	14	11	25	94	18	0	2	0
560	559	42	Familiar	Incongruent	Feedback	FamIncongDay2_dprime	0.767407480118023	0	0	13	1	14	84	20	0	48	0
561	560	43	Familiar	Incongruent	Feedback	FamIncongDay2_dprime	0.928705789767294	1	0	18	7	25	119	21	1	60	0
562	561	44	Familiar	Incongruent	Feedback	FamIncongDay2_dprime	0.130451896356789	1	0	21	12	33	75	18	0	24	1
563	562	45	Familiar	Incongruent	Feedback	FamIncongDay2_dprime	0.5297433791827	2	1	20	21	41	84	18	1	7	0
564	563	46	Familiar	Incongruent	Feedback	FamIncongDay2_dprime	1.07431398275596	2	1	21	11	32	96	19	1	0	0
565	564	47	Familiar	Incongruent	Feedback	FamIncongDay2_dprime	0.700391548297553	3	1	9	8	17	93	18	1	26	0
566	565	48	Familiar	Incongruent	Feedback	FamIncongDay2_dprime	0.784734986413067	3	1	13	12	25	89	20	1	13	0
567	566	49	Familiar	Incongruent	Feedback	FamIncongDay2_dprime	0.928705789767294	0	0	5	0	5	78	20	1	24	0
568	567	50	Familiar	Incongruent	Feedback	FamIncongDay2_dprime	0.649167115642985	0	0	18	17	35	108	18	1	6	0
569	568	51	Familiar	Incongruent	Feedback	FamIncongDay2_dprime	0.604134031689825	1	0	11	8	19	98	18	1	0	0
570	569	52	Familiar	Incongruent	Feedback	FamIncongDay2_dprime	0.434815419664277	1	0	18	13	31	87	18	1	0	0
571	570	53	Familiar	Incongruent	Feedback	FamIncongDay2_dprime	0.527884015026604	2	1	26	23	49	95	25	1	120	0
572	571	54	Familiar	Incongruent	Feedback	FamIncongDay2_dprime	0.604134031689825	2	1	12	16	28	114	18	1	6	0
573	572	55	Familiar	Incongruent	Feedback	FamIncongDay2_dprime	0.754126093202723	3	1	18	15	33	84	19	1	10	0
574	573	56	Familiar	Incongruent	Feedback	FamIncongDay2_dprime	0.313542514864756	2	1	13	16	29	107	19	1	36	0
575	574	57	Familiar	Incongruent	Feedback	FamIncongDay2_dprime	0.814629991324423	3	1	22	20	42	101	19	1	20	0
576	575	58	Familiar	Incongruent	Feedback	FamIncongDay2_dprime	1.01520018159867	0	0	16	16	32	89	25	1	72	0
577	576	59	Familiar	Incongruent	Feedback	FamIncongDay2_dprime	0.736537711025565	0	0	22	16	38	131	20	1	0	0
578	577	60	Familiar	Incongruent	Feedback	FamIncongDay2_dprime	0.393564381390271	1	0	23	19	42	110	19	1	32	0
579	578	61	Familiar	Incongruent	Feedback	FamIncongDay2_dprime	0.876038154575962	1	0	20	23	43	104	23	1	9	0
580	579	62	Familiar	Incongruent	Feedback	FamIncongDay2_dprime	0.784734986413067	3	1	14	0	14	99	45	1	300	1
581	580	63	Familiar	Incongruent	Feedback	FamIncongDay2_dprime	0.593931445969882	2	1	15	12	27	93	18	1	3	0
582	581	64	Familiar	Incongruent	Feedback	FamIncongDay2_dprime	0.373372442423983	3	1	17	12	29	95	21	1	52	0
583	582	65	Familiar	Incongruent	Feedback	FamIncongDay2_dprime	0.815534256454261	3	1	17	19	36	97	21	0	70	0
584	583	66	Familiar	Incongruent	Feedback	FamIncongDay2_dprime	0.794978705588741	0	0	20	9	29	96	18	1	3	0
585	584	67	Familiar	Incongruent	Feedback	FamIncongDay2_dprime	0.757093261891085	0	0	13	16	29	108	18	0	0	0
586	585	68	Familiar	Incongruent	Feedback	FamIncongDay2_dprime	0.845238884534768	1	0	23	16	39	121	18	1	6	0
587	586	69	Familiar	Incongruent	Feedback	FamIncongDay2_dprime	0.938995312023132	1	0	19	20	39	80	18	0	4	0
588	587	70	Familiar	Incongruent	Feedback	FamIncongDay2_dprime	1.0846282009829	2	1	16	13	29	99	18	1	12	0
589	588	71	Familiar	Incongruent	Feedback	FamIncongDay2_dprime	0.726293991849891	2	1	9	10	19	96	23	1	84	0
590	589	72	Familiar	Incongruent	Feedback	FamIncongDay2_dprime	0.332609447261714	3	1	23	20	43	112	19	1	18	0
591	590	73	Familiar	Incongruent	Feedback	FamIncongDay2_dprime	0.363106413814301	3	1	9	14	23	124	19	1	7	0
592	591	74	Familiar	Incongruent	Feedback	FamIncongDay2_dprime	0.0803793501585193	0	0	27	17	44	68	19	1	20	0
593	592	75	Familiar	Incongruent	Feedback	FamIncongDay2_dprime	0.814629991324423	0	0	12	19	31	124	18	1	48	0
594	593	76	Familiar	Incongruent	Feedback	FamIncongDay2_dprime	1.0846282009829	1	0	9	13	22	88	20	0	60	0
595	594	77	Familiar	Incongruent	Feedback	FamIncongDay2_dprime	0.403786958283702	1	0	13	18	31	122	21	0	36	0
596	595	78	Familiar	Incongruent	Feedback	FamIncongDay2_dprime	0.835016307641337	2	1	4	6	10	119	31	1	168	0
597	596	79	Familiar	Incongruent	Feedback	FamIncongDay2_dprime	0.713588719214833	2	1	12	14	26	91	19	1	12	0
598	597	80	Familiar	Incongruent	Feedback	FamIncongDay2_dprime	0.332437532025254	3	1	12	10	22	82	20	1	6	0
599	598	81	Familiar	Incongruent	Feedback	FamIncongDay2_dprime	0.624600327758929	3	1	8	10	18	83	21	1	5	0
600	599	82	Familiar	Incongruent	Feedback	FamIncongDay2_dprime	0.845238884534768	0	0	7	11	18	108	24	1	84	0
601	600	83	Familiar	Incongruent	Feedback	FamIncongDay2_dprime	0.811537156952725	0	0	11	3	14	83	42	1	324	1
602	601	84	Familiar	Incongruent	Feedback	FamIncongDay2_dprime	1.01520018159867	1	0	24	15	39	69	24	1	48	0
603	602	85	Familiar	Incongruent	Feedback	FamIncongDay2_dprime	1.06402446050012	1	0	15	4	19	119	19	1	6	0
604	603	86	Familiar	Incongruent	Feedback	FamIncongDay2_dprime	0.984330412506209	2	1	16	11	27	118	19	1	13	0
605	604	87	Familiar	Incongruent	Feedback	FamIncongDay2_dprime	0.403786958283702	2	1	12	15	27	89	18	0	16	0
606	605	88	Familiar	Incongruent	Feedback	FamIncongDay2_dprime	0.486949104627874	3	1	26	14	40	96	21	1	60	0
607	606	89	Familiar	Incongruent	Feedback	FamIncongDay2_dprime	0.659369701362928	3	1	17	18	35	102	18	0	4	0
608	607	90	Familiar	Incongruent	Feedback	FamIncongDay2_dprime	0.479068727370501	0	0	26	15	41	79	25	1	4	0
609	608	91	Familiar	Incongruent	Feedback	FamIncongDay2_dprime	0.466599376610143	0	0	15	11	26	114	19	0	22	1
610	609	92	Familiar	Incongruent	Feedback	FamIncongDay2_dprime	0.231149688631333	1	0	25	25	50	67	20	1	60	0
611	610	93	Familiar	Incongruent	Feedback	FamIncongDay2_dprime	0.679835997432032	1	0	10	5	15	82	21	0	36	0
612	611	94	Familiar	Incongruent	Feedback	FamIncongDay2_dprime	0.716071414956461	2	1	28	11	39	86	24	1	84	0
613	612	95	Familiar	Incongruent	Feedback	FamIncongDay2_dprime	0.784734986413067	2	1	18	18	36	114	18	1	8	1
614	613	96	Familiar	Incongruent	Feedback	FamIncongDay2_dprime	0.886352372802899	3	1	17	16	33	101	31	1	144	0
615	614	97	Familiar	Incongruent	Feedback	FamIncongDay2_dprime	0.93331180269943	3	1	18	19	37	99	22	1	0	0
616	615	98	Familiar	Incongruent	Feedback	FamIncongDay2_dprime	0.953661530717161	0	0	12	10	22	84	22	0	15	0
617	616	99	Familiar	Incongruent	Feedback	FamIncongDay2_dprime	0.405914508610867	0	0	24	19	23	100	18	1	19	0
618	617	100	Familiar	Incongruent	Feedback	FamIncongDay2_dprime	0.984330412506209	1	0	25	21	46	107	20	1	36	0
619	618	101	Familiar	Incongruent	Feedback	FamIncongDay2_dprime	0.475750330063006	1	0	23	19	42	104	18	1	12	0
620	619	102	Familiar	Incongruent	Feedback	FamIncongDay2_dprime	0.815534256454261	2	1	11	9	20	86	18	1	20	0
621	620	103	Familiar	Incongruent	Feedback	FamIncongDay2_dprime	0.876038154575962	2	1	17	18	35	114	20	0	58	0
622	621	104	Familiar	Incongruent	Feedback	FamIncongDay2_dprime	0.695685098639547	3	1	13	13	26	104	20	1	0	0
623	622	105	Familiar	Incongruent	Feedback	FamIncongDay2_dprime	0.994596441115891	3	1	16	15	31	100	21	1	48	0
624	623	106	Familiar	Incongruent	Feedback	FamIncongDay2_dprime	0.383361795670328	0	0	6	2	8	88	22	1	36	0
