# Supplementary material for: Habit Expression and Disruption as a Function of Attention-Deficit/Hyperactivity Disorder Symptomology
Source: Front Psychol. 2019 Sep 3;10:1997. doi: 10.3389/fpsyg.2019.01997 (PMC6733985; doi:10.3389/fpsyg.2019.01997)
Supplement: Supplementary file 1 [file Data_Sheet_1.ZIP › df_dprime_wide.csv]

	Subject	FamCongDay1_dprime	FamIncongDay1_dprime	NovCongDay1_dprime	NovIncongDay1_dprime	FamCongDay2_dprime	FamIncongDay2_dprime
1	1	0.527894210843465	0.0200543703529506	0.325535158452348	0.231267528388832	0.754126093202723	0.231149688631333
2	2	0.865748632320123	0.736537711025565	0.726293991849891	0.77774761584384	0.938995312023132	0.886352372802899
3	3	0.517617986416921	0.383361795670328	0.539927109779671	0.57358171795215	0.54848775550938	0.659369701362928
4	4	0.638983385046015	0.726293991849891	0.638983385046015	0.466599376610143	0.723676877668344	0.486039852318845
5	5	0.865748632320123	0.726293991849891	0.705868829236518	0.908196041981938	0.77774761584384	0.517617986416921
6	6	0.593931445969882	0.424631689067306	0.593931445969882	0.394182473532927	0.527884015026604	0.455240582277651
7	7	0.588308733233815	0.663139820163271	0.897973465088507	0.774512409519636	0.614356608583256	0.604134031689825
8	8	0.974086693330535	0.974086693330535	1.07431398275596	0.902909182308548	0.887770879368565	1.04351471271477
9	9	0.685519101218786	0.43619675621926	0.373957037255107	0.221212529318694	0.180869551584597	0.0906817869323937
10	10	0.608534169511636	0.57821500267655	0.499294163648321	0.716071414956461	0.938995312023132	0.746803739635247
11	11	0.614356608583256	0.634866356368611	0.352862694638628	0.414465691646545	0.690102026041714	0.550129695499614
12	12	0.938995312023132	0.679835997432032	0.301938430993554	0.512896849952875	0.825848474681199	0.94930953025007
13	13	0.695685098639547	0.342728849538978	0.754126093202723	0.563432344938182	0.669592278256359	0.685519101218786
14	14	0.628817387625254	0.373178065073357	0.643036919000173	0.594643826529957	0.57358171795215	0.539927109779671
15	15	0.757093261891085	0.456450003596174	0.733810722767994	0.784734986413067	0.342640117745197	0.736537711025565
16	16	0.679835997432032	0.794978705588741	0.886352372802899	0.825848474681199	0.757093261891085	0.886352372802899
17	18	0.896692508528717	0.928705789767294	0.736537711025565	1.02554031732448	0.836188610407016	0.836188610407016
18	19	0.645010446827348	0.468974996813235	0.221043654630777	0.28168518361664	0.151739895677117	0.507374267241248
19	20	0.700391548297553	0.659369701362928	0.29210462275989	0.393564381390271	0.373372442423983	0.465484301453324
20	21	0.963864116437104	0.499294163648321	0.835016307641337	0.794978705588741	0.517617986416921	0.434815419664277
21	22	0.695685098639547	0.543179097561268	0.705868829236518	0.743960095781962	0.690102026041714	0.71070576652449
22	23	1.06402446050012	0.974086693330535	1.06402446050012	1.00488596337173	1.02554031732448	1.09496833670871
23	24	0.784734986413067	0.352862694638628	0.679835997432032	0.634866356368611	0.403786958283702	0.475750330063006
24	25	0.855482603710441	0.743960095781962	0.918439761157612	0.690102026041714	0.805244734198423	0.938995312023132
25	26	0.527884015026604	0.231149688631333	0.394182473532927	0.614356608583256	0.669592278256359	0.180869551584597
26	27	0.972337201692777	0.534427193808315	0.584595924436997	0.57821500267655	0.867421151350833	0.628817387625254
27	28	0.877587148771594	0.994596441115891	0.424631689067306	0.754126093202723	0.705868829236518	0.726293991849891
28	29	0.486949104627874	0.624600327758929	0.466599376610143	0.713557475391079	0.886352372802899	0.908196041981938
29	30	0.847137933237215	0.221947849494801	0.604698825600096	0.655116480827904	0.943477800120191	0.509428008747971
30	31	0.42870210707311	0.512896849952875	0.456450003596174	0.271579149616084	0.618668014611285	0.835016307641337
31	32	0.231149688631333	0.201122798961511	0.241269090908597	0.0407016867516428	0.271579149616084	0.0810345960170071
32	33	0.373957037255107	0.675369728204818	0.448820230380452	0.438757106143249	0.43619675621926	0.543179097561268
33	34	0.94930953025007	0.928705789767294	0.865748632320123	0.583747715372911	0.94930953025007	0.705868829236518
34	35	0.845238884534768	0.519577381761939	0.57358171795215	0.716071414956461	0.757093261891085	1.01520018159867
35	36	0.673202944400475	0.275396711479208	0	0.221212529318694	0.20086744102294	0.0301447294273214
36	38	1.05375843189044	0.953661530717161	0.892803148307992	0.837018530959951	0.974086693330535	0.794314620889694
37	39	0.685519101218786	0.805244734198423	0.723676877668344	0.716071414956461	0.94930953025007	0.784734986413067
38	40	0.723676877668344	0.726293991849891	0.857271778336865	0.784180775790044	0.726293991849891	0.918439761157612
39	41	0.335564864719586	0.0402383087825133	0.223263026515611	0.328374716631005	0.293463913320768	0.23197755576204
40	42	0.746803739635247	0.322253801428284	0.271718306442976	0.44501800538422	0.679835997432032	0.767407480118023
41	43	0.855482603710441	0.984330412506209	0.897973465088507	1.03329213582133	0.918439761157612	0.928705789767294
42	44	0.362309545976671	0.213230292950832	0.130914845143826	0.398575603436162	0.57358171795215	0.130451896356789
43	45	0.835016307641337	0.251402936008247	0.608534169511636	0.434815419664277	0.301938430993554	0.5297433791827
44	46	0.923162429685462	0.665235883105168	0.832388625917641	0.881738043757882	0.938995312023132	1.07431398275596
45	47	0.293463913320768	0.261552309022215	0.583747715372911	0.716071414956461	0.543179097561268	0.700391548297553
46	48	0.543179097561268	0.634916716270082	0.643036919000173	0.655116480827904	0.705868829236518	0.784734986413067
47	49	0.804463993903662	0.659369701362928	0.634866356368611	0.560352272393045	0.825848474681199	0.928705789767294
48	50	0.499294163648321	0.733810722767994	0.77406137351278	0.628817387625254	0.733810722767994	0.649167115642985
49	51	0.876038154575962	0.794978705588741	0.71070576652449	0.794978705588741	0.591151542434238	0.604134031689825
50	52	0.876038154575962	0.539927109779671	0.815534256454261	0.669592278256359	0.716071414956461	0.434815419664277
51	53	0.141517318783686	0.222403226927206	0.322836947438676	0.767407480118023	0.665810232577205	0.527884015026604
52	54	0.547997112006563	0.527894210843465	0.887770879368565	1.01290581950442	0.855482603710441	0.604134031689825
53	55	0.824813721921394	0.659369701362928	0.604698825600096	0.675369728204818	0.593931445969882	0.754126093202723
54	56	0.527894210843465	0.171023585849728	0.318341983066226	0.656148979375354	0.543179097561268	0.313542514864756
55	57	0.588308733233815	0.458892513762664	0.814629991324423	0.563432344938182	0.764309823799693	0.814629991324423
56	58	0.784734986413067	0.938995312023132	0.736537711025565	0.669592278256359	0.876038154575962	1.01520018159867
57	59	0.855482603710441	0.553298499838532	0.486949104627874	0.550129695499614	0.373372442423983	0.736537711025565
58	60	0.601465760661176	0.669592278256359	0.414030677459375	0.550129695499614	0.35378082364727	0.393564381390271
59	61	0.814629991324423	0.582841507271216	0.746803739635247	0.426090722218705	0.736537711025565	0.876038154575962
60	62	0.892803148307992	0.766497974569044	0.673202944400475	0.902909182308548	0.774512409519636	0.784734986413067
61	63	0.679835997432032	0.151739895677117	0.466599376610143	0.618668014611285	0.527884015026604	0.593931445969882
62	64	0.659369701362928	0.261552309022215	0.424631689067306	0.649167115642985	0.352862694638628	0.373372442423983
63	65	0.342640117745197	0.673202944400475	0.695685098639547	0.522979333003446	0.845238884534768	0.815534256454261
64	66	0.876038154575962	0.764309823799693	0.638983385046015	0.913028584585812	0.784180775790044	0.794978705588741
65	67	0.994596441115891	0.876038154575962	0.669592278256359	0.825848474681199	0.746803739635247	0.757093261891085
66	68	0.845238884534768	0.618668014611285	0.302327199653321	0.628817387625254	0.887770879368565	0.845238884534768
67	69	0.94930953025007	0.94930953025007	0.705868829236518	0.784734986413067	0.805244734198423	0.938995312023132
68	70	1.04351471271477	0.887770879368565	0.992590449069691	0.974086693330535	1.0846282009829	1.0846282009829
69	71	0.507374267241248	0.64515587862445	0.550129695499614	0.675369728204818	0.887770879368565	0.726293991849891
70	72	0.5125981934493	0.5297433791827	0.857271778336865	0.271579149616084	0.313542514864756	0.332609447261714
71	73	0.455240582277651	0.383361795670328	0.489174761371057	0.352862694638628	0	0.363106413814301
72	74	0.452579939626373	0.713588719214833	0.584595924436997	0.111532042012592	0.41865420498015	0.0803793501585193
73	75	0.837018530959951	0.507815609299476	0.408612376715927	0.512896849952875	0.723676877668344	0.814629991324423
74	76	0.527884015026604	0.865748632320123	0.614356608583256	0.805244734198423	1.09496833670871	1.0846282009829
75	77	0.486039852318845	0.560352272393045	0.352862694638628	0.638983385046015	0.393976182906759	0.403786958283702
76	78	0.723676877668344	0.442547206061594	0.558060236243767	0.42870210707311	0.938995312023132	0.835016307641337
77	79	0.32250703356619	0.0813141082935084	0.266838202858734	0.766497974569044	0.564517322893009	0.713588719214833
78	80	0.553298499838532	0.373957037255107	0.404316318632577	0.313542514864756	0.322503413261158	0.332437532025254
79	81	0.384063071255663	0.373178065073357	0.618668014611285	0.519577381761939	0.352862694638628	0.624600327758929
80	82	0.897973465088507	0.786600875732143	0.851647914673189	0.623291035039966	0.716071414956461	0.845238884534768
81	83	0.812310024373653	0.871705310193103	0.721011299453607	0.76216653308841	0.781425821843958	0.811537156952725
82	84	0.716071414956461	0.746803739635247	0.679835997432032	0.669592278256359	0.736537711025565	1.01520018159867
83	85	1.04351471271477	0.908196041981938	0.764309823799693	0.784734986413067	0.918439761157612	1.06402446050012
84	86	0.835016307641337	0.312087804007523	0.669592278256359	0.877587148771594	0.784734986413067	0.984330412506209
85	87	0.527884015026604	0.180869551584597	0.550129695499614	0.659369701362928	0.0402078536645249	0.403786958283702
86	88	0.743960095781962	0.77406137351278	0.93331180269943	0.643345405392917	0.690102026041714	0.486949104627874
87	89	0.0903614371292585	0.210949924073511	0.373178065073357	0.618668014611285	0.342640117745197	0.659369701362928
88	90	0.713557475391079	0.489174761371057	0.522979333003446	0.130517797131659	0.322503413261158	0.479068727370501
89	91	0.659369701362928	0.394182473532927	0.211920160242126	0.527894210843465	0.499294163648321	0.466599376610143
90	92	0.489174761371057	0.486949104627874	0.426090722218705	0.342640117745197	0.403786958283702	0.231149688631333
91	93	0.93331180269943	0.835016307641337	0.462616712906138	0.683275227782686	0.679835997432032	0.679835997432032
92	94	0.363012067652596	0.363012067652596	0.553298499838532	0.628817387625254	0.757093261891085	0.716071414956461
93	95	0.690102026041714	0.465484301453324	0.638983385046015	0.736537711025565	0.455240582277651	0.784734986413067
94	96	1.02554031732448	1.00488596337173	0.876038154575962	0.938995312023132	0.984330412506209	0.886352372802899
95	97	0.191866798041576	0.312029408929935	0.653084821093133	0.397455485292592	0.608534169511636	0.93331180269943
96	98	0.972337201692777	0.594643826529957	0.923162429685462	0.992590449069691	0.918439761157612	0.953661530717161
97	99	0.716071414956461	0.355634371564131	0.394182473532927	0.448820230380452	0.170763517584041	0.405914508610867
98	100	0.943477800120191	0.814629991324423	0.908196041981938	0.824813721921394	1.00488596337173	0.984330412506209
99	101	0.474246929243307	0.544454883060991	0.332729610459621	0.492480070141958	0.653084821093133	0.475750330063006
100	102	0.753861608954958	0.564517322893009	0.763955339512224	0.763955339512224	0.886352372802899	0.815534256454261
101	103	0.690102026041714	0.385779100991452	0.628817387625254	0.984330412506209	0.824813721921394	0.876038154575962
102	104	0.593931445969882	0.373957037255107	0.462616712906138	0.563432344938182	0.624600327758929	0.695685098639547
103	105	0.77406137351278	0.887770879368565	1.01290581950442	1.06402446050012	0.705868829236518	0.994596441115891
104	106	0.224382714020023	0.141137871702135	0.301997285780835	0.325535158452348	0.558060236243767	0.383361795670328
