# Supplementary material for: Habit Expression and Disruption as a Function of Attention-Deficit/Hyperactivity Disorder Symptomology
Source: Front Psychol. 2019 Sep 3;10:1997. doi: 10.3389/fpsyg.2019.01997 (PMC6733985; doi:10.3389/fpsyg.2019.01997)
Supplement: Supplementary file 1 [file Data_Sheet_1.ZIP › dprime_long.csv]

	Subject	StimulusType	Congruency	FeedbackCond	DV	dprime
0	1	Familiar	Congruent	NoFeedback	FamCongDay1_dprime	0.527894210843465
1	2	Familiar	Congruent	NoFeedback	FamCongDay1_dprime	0.8657486323201229
2	3	Familiar	Congruent	NoFeedback	FamCongDay1_dprime	0.517617986416921
3	4	Familiar	Congruent	NoFeedback	FamCongDay1_dprime	0.638983385046015
4	5	Familiar	Congruent	NoFeedback	FamCongDay1_dprime	0.8657486323201229
5	6	Familiar	Congruent	NoFeedback	FamCongDay1_dprime	0.5939314459698821
6	7	Familiar	Congruent	NoFeedback	FamCongDay1_dprime	0.5883087332338149
7	8	Familiar	Congruent	NoFeedback	FamCongDay1_dprime	0.974086693330535
8	9	Familiar	Congruent	NoFeedback	FamCongDay1_dprime	0.6855191012187859
9	10	Familiar	Congruent	NoFeedback	FamCongDay1_dprime	0.608534169511636
10	11	Familiar	Congruent	NoFeedback	FamCongDay1_dprime	0.614356608583256
11	12	Familiar	Congruent	NoFeedback	FamCongDay1_dprime	0.9389953120231321
12	13	Familiar	Congruent	NoFeedback	FamCongDay1_dprime	0.695685098639547
13	14	Familiar	Congruent	NoFeedback	FamCongDay1_dprime	0.628817387625254
14	15	Familiar	Congruent	NoFeedback	FamCongDay1_dprime	0.757093261891085
15	16	Familiar	Congruent	NoFeedback	FamCongDay1_dprime	0.6798359974320319
16	18	Familiar	Congruent	NoFeedback	FamCongDay1_dprime	0.896692508528717
17	19	Familiar	Congruent	NoFeedback	FamCongDay1_dprime	0.645010446827348
18	20	Familiar	Congruent	NoFeedback	FamCongDay1_dprime	0.7003915482975529
19	21	Familiar	Congruent	NoFeedback	FamCongDay1_dprime	0.963864116437104
20	22	Familiar	Congruent	NoFeedback	FamCongDay1_dprime	0.695685098639547
21	23	Familiar	Congruent	NoFeedback	FamCongDay1_dprime	1.06402446050012
22	24	Familiar	Congruent	NoFeedback	FamCongDay1_dprime	0.7847349864130669
23	25	Familiar	Congruent	NoFeedback	FamCongDay1_dprime	0.8554826037104408
24	26	Familiar	Congruent	NoFeedback	FamCongDay1_dprime	0.527884015026604
25	27	Familiar	Congruent	NoFeedback	FamCongDay1_dprime	0.9723372016927769
26	28	Familiar	Congruent	NoFeedback	FamCongDay1_dprime	0.8775871487715942
27	29	Familiar	Congruent	NoFeedback	FamCongDay1_dprime	0.486949104627874
28	30	Familiar	Congruent	NoFeedback	FamCongDay1_dprime	0.847137933237215
29	31	Familiar	Congruent	NoFeedback	FamCongDay1_dprime	0.42870210707310996
30	32	Familiar	Congruent	NoFeedback	FamCongDay1_dprime	0.231149688631333
31	33	Familiar	Congruent	NoFeedback	FamCongDay1_dprime	0.3739570372551071
32	34	Familiar	Congruent	NoFeedback	FamCongDay1_dprime	0.9493095302500699
33	35	Familiar	Congruent	NoFeedback	FamCongDay1_dprime	0.845238884534768
34	36	Familiar	Congruent	NoFeedback	FamCongDay1_dprime	0.673202944400475
35	38	Familiar	Congruent	NoFeedback	FamCongDay1_dprime	1.05375843189044
36	39	Familiar	Congruent	NoFeedback	FamCongDay1_dprime	0.6855191012187859
37	40	Familiar	Congruent	NoFeedback	FamCongDay1_dprime	0.7236768776683441
38	41	Familiar	Congruent	NoFeedback	FamCongDay1_dprime	0.335564864719586
39	42	Familiar	Congruent	NoFeedback	FamCongDay1_dprime	0.7468037396352472
40	43	Familiar	Congruent	NoFeedback	FamCongDay1_dprime	0.8554826037104408
41	44	Familiar	Congruent	NoFeedback	FamCongDay1_dprime	0.36230954597667103
42	45	Familiar	Congruent	NoFeedback	FamCongDay1_dprime	0.835016307641337
43	46	Familiar	Congruent	NoFeedback	FamCongDay1_dprime	0.9231624296854619
44	47	Familiar	Congruent	NoFeedback	FamCongDay1_dprime	0.293463913320768
45	48	Familiar	Congruent	NoFeedback	FamCongDay1_dprime	0.5431790975612679
46	49	Familiar	Congruent	NoFeedback	FamCongDay1_dprime	0.804463993903662
47	50	Familiar	Congruent	NoFeedback	FamCongDay1_dprime	0.499294163648321
48	51	Familiar	Congruent	NoFeedback	FamCongDay1_dprime	0.876038154575962
49	52	Familiar	Congruent	NoFeedback	FamCongDay1_dprime	0.876038154575962
50	53	Familiar	Congruent	NoFeedback	FamCongDay1_dprime	0.141517318783686
51	54	Familiar	Congruent	NoFeedback	FamCongDay1_dprime	0.547997112006563
52	55	Familiar	Congruent	NoFeedback	FamCongDay1_dprime	0.824813721921394
53	56	Familiar	Congruent	NoFeedback	FamCongDay1_dprime	0.527894210843465
54	57	Familiar	Congruent	NoFeedback	FamCongDay1_dprime	0.5883087332338149
55	58	Familiar	Congruent	NoFeedback	FamCongDay1_dprime	0.7847349864130669
56	59	Familiar	Congruent	NoFeedback	FamCongDay1_dprime	0.8554826037104408
57	60	Familiar	Congruent	NoFeedback	FamCongDay1_dprime	0.601465760661176
58	61	Familiar	Congruent	NoFeedback	FamCongDay1_dprime	0.8146299913244229
59	62	Familiar	Congruent	NoFeedback	FamCongDay1_dprime	0.8928031483079921
60	63	Familiar	Congruent	NoFeedback	FamCongDay1_dprime	0.6798359974320319
61	64	Familiar	Congruent	NoFeedback	FamCongDay1_dprime	0.659369701362928
62	65	Familiar	Congruent	NoFeedback	FamCongDay1_dprime	0.34264011774519704
63	66	Familiar	Congruent	NoFeedback	FamCongDay1_dprime	0.876038154575962
64	67	Familiar	Congruent	NoFeedback	FamCongDay1_dprime	0.9945964411158911
65	68	Familiar	Congruent	NoFeedback	FamCongDay1_dprime	0.845238884534768
66	69	Familiar	Congruent	NoFeedback	FamCongDay1_dprime	0.9493095302500699
67	70	Familiar	Congruent	NoFeedback	FamCongDay1_dprime	1.04351471271477
68	71	Familiar	Congruent	NoFeedback	FamCongDay1_dprime	0.507374267241248
69	72	Familiar	Congruent	NoFeedback	FamCongDay1_dprime	0.5125981934493
70	73	Familiar	Congruent	NoFeedback	FamCongDay1_dprime	0.45524058227765096
71	74	Familiar	Congruent	NoFeedback	FamCongDay1_dprime	0.452579939626373
72	75	Familiar	Congruent	NoFeedback	FamCongDay1_dprime	0.8370185309599509
73	76	Familiar	Congruent	NoFeedback	FamCongDay1_dprime	0.527884015026604
74	77	Familiar	Congruent	NoFeedback	FamCongDay1_dprime	0.48603985231884494
75	78	Familiar	Congruent	NoFeedback	FamCongDay1_dprime	0.7236768776683441
76	79	Familiar	Congruent	NoFeedback	FamCongDay1_dprime	0.32250703356619
77	80	Familiar	Congruent	NoFeedback	FamCongDay1_dprime	0.553298499838532
78	81	Familiar	Congruent	NoFeedback	FamCongDay1_dprime	0.38406307125566297
79	82	Familiar	Congruent	NoFeedback	FamCongDay1_dprime	0.8979734650885071
80	83	Familiar	Congruent	NoFeedback	FamCongDay1_dprime	0.812310024373653
81	84	Familiar	Congruent	NoFeedback	FamCongDay1_dprime	0.7160714149564609
82	85	Familiar	Congruent	NoFeedback	FamCongDay1_dprime	1.04351471271477
83	86	Familiar	Congruent	NoFeedback	FamCongDay1_dprime	0.835016307641337
84	87	Familiar	Congruent	NoFeedback	FamCongDay1_dprime	0.527884015026604
85	88	Familiar	Congruent	NoFeedback	FamCongDay1_dprime	0.743960095781962
86	89	Familiar	Congruent	NoFeedback	FamCongDay1_dprime	0.0903614371292585
87	90	Familiar	Congruent	NoFeedback	FamCongDay1_dprime	0.713557475391079
88	91	Familiar	Congruent	NoFeedback	FamCongDay1_dprime	0.659369701362928
89	92	Familiar	Congruent	NoFeedback	FamCongDay1_dprime	0.48917476137105703
90	93	Familiar	Congruent	NoFeedback	FamCongDay1_dprime	0.93331180269943
91	94	Familiar	Congruent	NoFeedback	FamCongDay1_dprime	0.363012067652596
92	95	Familiar	Congruent	NoFeedback	FamCongDay1_dprime	0.690102026041714
93	96	Familiar	Congruent	NoFeedback	FamCongDay1_dprime	1.02554031732448
94	97	Familiar	Congruent	NoFeedback	FamCongDay1_dprime	0.19186679804157603
95	98	Familiar	Congruent	NoFeedback	FamCongDay1_dprime	0.9723372016927769
96	99	Familiar	Congruent	NoFeedback	FamCongDay1_dprime	0.7160714149564609
97	100	Familiar	Congruent	NoFeedback	FamCongDay1_dprime	0.943477800120191
98	101	Familiar	Congruent	NoFeedback	FamCongDay1_dprime	0.474246929243307
99	102	Familiar	Congruent	NoFeedback	FamCongDay1_dprime	0.753861608954958
100	103	Familiar	Congruent	NoFeedback	FamCongDay1_dprime	0.690102026041714
101	104	Familiar	Congruent	NoFeedback	FamCongDay1_dprime	0.5939314459698821
102	105	Familiar	Congruent	NoFeedback	FamCongDay1_dprime	0.77406137351278
103	106	Familiar	Congruent	NoFeedback	FamCongDay1_dprime	0.22438271402002302
104	1	Familiar	Incongruent	NoFeedback	FamIncongDay1_dprime	0.0200543703529506
105	2	Familiar	Incongruent	NoFeedback	FamIncongDay1_dprime	0.736537711025565
106	3	Familiar	Incongruent	NoFeedback	FamIncongDay1_dprime	0.3833617956703279
107	4	Familiar	Incongruent	NoFeedback	FamIncongDay1_dprime	0.726293991849891
108	5	Familiar	Incongruent	NoFeedback	FamIncongDay1_dprime	0.726293991849891
109	6	Familiar	Incongruent	NoFeedback	FamIncongDay1_dprime	0.424631689067306
110	7	Familiar	Incongruent	NoFeedback	FamIncongDay1_dprime	0.663139820163271
111	8	Familiar	Incongruent	NoFeedback	FamIncongDay1_dprime	0.974086693330535
112	9	Familiar	Incongruent	NoFeedback	FamIncongDay1_dprime	0.43619675621926
113	10	Familiar	Incongruent	NoFeedback	FamIncongDay1_dprime	0.5782150026765501
114	11	Familiar	Incongruent	NoFeedback	FamIncongDay1_dprime	0.6348663563686109
115	12	Familiar	Incongruent	NoFeedback	FamIncongDay1_dprime	0.6798359974320319
116	13	Familiar	Incongruent	NoFeedback	FamIncongDay1_dprime	0.34272884953897803
117	14	Familiar	Incongruent	NoFeedback	FamIncongDay1_dprime	0.3731780650733571
118	15	Familiar	Incongruent	NoFeedback	FamIncongDay1_dprime	0.45645000359617405
119	16	Familiar	Incongruent	NoFeedback	FamIncongDay1_dprime	0.794978705588741
120	18	Familiar	Incongruent	NoFeedback	FamIncongDay1_dprime	0.9287057897672941
121	19	Familiar	Incongruent	NoFeedback	FamIncongDay1_dprime	0.468974996813235
122	20	Familiar	Incongruent	NoFeedback	FamIncongDay1_dprime	0.659369701362928
123	21	Familiar	Incongruent	NoFeedback	FamIncongDay1_dprime	0.499294163648321
124	22	Familiar	Incongruent	NoFeedback	FamIncongDay1_dprime	0.5431790975612679
125	23	Familiar	Incongruent	NoFeedback	FamIncongDay1_dprime	0.974086693330535
126	24	Familiar	Incongruent	NoFeedback	FamIncongDay1_dprime	0.352862694638628
127	25	Familiar	Incongruent	NoFeedback	FamIncongDay1_dprime	0.743960095781962
128	26	Familiar	Incongruent	NoFeedback	FamIncongDay1_dprime	0.231149688631333
129	27	Familiar	Incongruent	NoFeedback	FamIncongDay1_dprime	0.534427193808315
130	28	Familiar	Incongruent	NoFeedback	FamIncongDay1_dprime	0.9945964411158911
131	29	Familiar	Incongruent	NoFeedback	FamIncongDay1_dprime	0.6246003277589289
132	30	Familiar	Incongruent	NoFeedback	FamIncongDay1_dprime	0.221947849494801
133	31	Familiar	Incongruent	NoFeedback	FamIncongDay1_dprime	0.512896849952875
134	32	Familiar	Incongruent	NoFeedback	FamIncongDay1_dprime	0.20112279896151103
135	33	Familiar	Incongruent	NoFeedback	FamIncongDay1_dprime	0.6753697282048179
136	34	Familiar	Incongruent	NoFeedback	FamIncongDay1_dprime	0.9287057897672941
137	35	Familiar	Incongruent	NoFeedback	FamIncongDay1_dprime	0.5195773817619389
138	36	Familiar	Incongruent	NoFeedback	FamIncongDay1_dprime	0.275396711479208
139	38	Familiar	Incongruent	NoFeedback	FamIncongDay1_dprime	0.9536615307171609
140	39	Familiar	Incongruent	NoFeedback	FamIncongDay1_dprime	0.805244734198423
141	40	Familiar	Incongruent	NoFeedback	FamIncongDay1_dprime	0.726293991849891
142	41	Familiar	Incongruent	NoFeedback	FamIncongDay1_dprime	0.0402383087825133
143	42	Familiar	Incongruent	NoFeedback	FamIncongDay1_dprime	0.322253801428284
144	43	Familiar	Incongruent	NoFeedback	FamIncongDay1_dprime	0.9843304125062091
145	44	Familiar	Incongruent	NoFeedback	FamIncongDay1_dprime	0.21323029295083198
146	45	Familiar	Incongruent	NoFeedback	FamIncongDay1_dprime	0.251402936008247
147	46	Familiar	Incongruent	NoFeedback	FamIncongDay1_dprime	0.665235883105168
148	47	Familiar	Incongruent	NoFeedback	FamIncongDay1_dprime	0.261552309022215
149	48	Familiar	Incongruent	NoFeedback	FamIncongDay1_dprime	0.634916716270082
150	49	Familiar	Incongruent	NoFeedback	FamIncongDay1_dprime	0.659369701362928
151	50	Familiar	Incongruent	NoFeedback	FamIncongDay1_dprime	0.733810722767994
152	51	Familiar	Incongruent	NoFeedback	FamIncongDay1_dprime	0.794978705588741
153	52	Familiar	Incongruent	NoFeedback	FamIncongDay1_dprime	0.539927109779671
154	53	Familiar	Incongruent	NoFeedback	FamIncongDay1_dprime	0.22240322692720604
155	54	Familiar	Incongruent	NoFeedback	FamIncongDay1_dprime	0.527894210843465
156	55	Familiar	Incongruent	NoFeedback	FamIncongDay1_dprime	0.659369701362928
157	56	Familiar	Incongruent	NoFeedback	FamIncongDay1_dprime	0.171023585849728
158	57	Familiar	Incongruent	NoFeedback	FamIncongDay1_dprime	0.458892513762664
159	58	Familiar	Incongruent	NoFeedback	FamIncongDay1_dprime	0.9389953120231321
160	59	Familiar	Incongruent	NoFeedback	FamIncongDay1_dprime	0.553298499838532
161	60	Familiar	Incongruent	NoFeedback	FamIncongDay1_dprime	0.669592278256359
162	61	Familiar	Incongruent	NoFeedback	FamIncongDay1_dprime	0.5828415072712161
163	62	Familiar	Incongruent	NoFeedback	FamIncongDay1_dprime	0.7664979745690441
164	63	Familiar	Incongruent	NoFeedback	FamIncongDay1_dprime	0.151739895677117
165	64	Familiar	Incongruent	NoFeedback	FamIncongDay1_dprime	0.261552309022215
166	65	Familiar	Incongruent	NoFeedback	FamIncongDay1_dprime	0.673202944400475
167	66	Familiar	Incongruent	NoFeedback	FamIncongDay1_dprime	0.764309823799693
168	67	Familiar	Incongruent	NoFeedback	FamIncongDay1_dprime	0.876038154575962
169	68	Familiar	Incongruent	NoFeedback	FamIncongDay1_dprime	0.6186680146112851
170	69	Familiar	Incongruent	NoFeedback	FamIncongDay1_dprime	0.9493095302500699
171	70	Familiar	Incongruent	NoFeedback	FamIncongDay1_dprime	0.8877708793685649
172	71	Familiar	Incongruent	NoFeedback	FamIncongDay1_dprime	0.64515587862445
173	72	Familiar	Incongruent	NoFeedback	FamIncongDay1_dprime	0.5297433791827
174	73	Familiar	Incongruent	NoFeedback	FamIncongDay1_dprime	0.3833617956703279
175	74	Familiar	Incongruent	NoFeedback	FamIncongDay1_dprime	0.7135887192148331
176	75	Familiar	Incongruent	NoFeedback	FamIncongDay1_dprime	0.507815609299476
177	76	Familiar	Incongruent	NoFeedback	FamIncongDay1_dprime	0.8657486323201229
178	77	Familiar	Incongruent	NoFeedback	FamIncongDay1_dprime	0.5603522723930451
179	78	Familiar	Incongruent	NoFeedback	FamIncongDay1_dprime	0.442547206061594
180	79	Familiar	Incongruent	NoFeedback	FamIncongDay1_dprime	0.0813141082935084
181	80	Familiar	Incongruent	NoFeedback	FamIncongDay1_dprime	0.3739570372551071
182	81	Familiar	Incongruent	NoFeedback	FamIncongDay1_dprime	0.3731780650733571
183	82	Familiar	Incongruent	NoFeedback	FamIncongDay1_dprime	0.7866008757321429
184	83	Familiar	Incongruent	NoFeedback	FamIncongDay1_dprime	0.8717053101931029
185	84	Familiar	Incongruent	NoFeedback	FamIncongDay1_dprime	0.7468037396352472
186	85	Familiar	Incongruent	NoFeedback	FamIncongDay1_dprime	0.908196041981938
187	86	Familiar	Incongruent	NoFeedback	FamIncongDay1_dprime	0.312087804007523
188	87	Familiar	Incongruent	NoFeedback	FamIncongDay1_dprime	0.18086955158459697
189	88	Familiar	Incongruent	NoFeedback	FamIncongDay1_dprime	0.77406137351278
190	89	Familiar	Incongruent	NoFeedback	FamIncongDay1_dprime	0.210949924073511
191	90	Familiar	Incongruent	NoFeedback	FamIncongDay1_dprime	0.48917476137105703
192	91	Familiar	Incongruent	NoFeedback	FamIncongDay1_dprime	0.394182473532927
193	92	Familiar	Incongruent	NoFeedback	FamIncongDay1_dprime	0.486949104627874
194	93	Familiar	Incongruent	NoFeedback	FamIncongDay1_dprime	0.835016307641337
195	94	Familiar	Incongruent	NoFeedback	FamIncongDay1_dprime	0.363012067652596
196	95	Familiar	Incongruent	NoFeedback	FamIncongDay1_dprime	0.465484301453324
197	96	Familiar	Incongruent	NoFeedback	FamIncongDay1_dprime	1.00488596337173
198	97	Familiar	Incongruent	NoFeedback	FamIncongDay1_dprime	0.31202940892993497
199	98	Familiar	Incongruent	NoFeedback	FamIncongDay1_dprime	0.5946438265299571
200	99	Familiar	Incongruent	NoFeedback	FamIncongDay1_dprime	0.355634371564131
201	100	Familiar	Incongruent	NoFeedback	FamIncongDay1_dprime	0.8146299913244229
202	101	Familiar	Incongruent	NoFeedback	FamIncongDay1_dprime	0.544454883060991
203	102	Familiar	Incongruent	NoFeedback	FamIncongDay1_dprime	0.564517322893009
204	103	Familiar	Incongruent	NoFeedback	FamIncongDay1_dprime	0.385779100991452
205	104	Familiar	Incongruent	NoFeedback	FamIncongDay1_dprime	0.3739570372551071
206	105	Familiar	Incongruent	NoFeedback	FamIncongDay1_dprime	0.8877708793685649
207	106	Familiar	Incongruent	NoFeedback	FamIncongDay1_dprime	0.14113787170213501
208	1	Novel	Congruent	NoFeedback	NovCongDay1_dprime	0.32553515845234804
209	2	Novel	Congruent	NoFeedback	NovCongDay1_dprime	0.726293991849891
210	3	Novel	Congruent	NoFeedback	NovCongDay1_dprime	0.539927109779671
211	4	Novel	Congruent	NoFeedback	NovCongDay1_dprime	0.638983385046015
212	5	Novel	Congruent	NoFeedback	NovCongDay1_dprime	0.705868829236518
213	6	Novel	Congruent	NoFeedback	NovCongDay1_dprime	0.5939314459698821
214	7	Novel	Congruent	NoFeedback	NovCongDay1_dprime	0.8979734650885071
215	8	Novel	Congruent	NoFeedback	NovCongDay1_dprime	1.07431398275596
216	9	Novel	Congruent	NoFeedback	NovCongDay1_dprime	0.3739570372551071
217	10	Novel	Congruent	NoFeedback	NovCongDay1_dprime	0.499294163648321
218	11	Novel	Congruent	NoFeedback	NovCongDay1_dprime	0.352862694638628
219	12	Novel	Congruent	NoFeedback	NovCongDay1_dprime	0.30193843099355394
220	13	Novel	Congruent	NoFeedback	NovCongDay1_dprime	0.754126093202723
221	14	Novel	Congruent	NoFeedback	NovCongDay1_dprime	0.643036919000173
222	15	Novel	Congruent	NoFeedback	NovCongDay1_dprime	0.733810722767994
223	16	Novel	Congruent	NoFeedback	NovCongDay1_dprime	0.886352372802899
224	18	Novel	Congruent	NoFeedback	NovCongDay1_dprime	0.736537711025565
225	19	Novel	Congruent	NoFeedback	NovCongDay1_dprime	0.221043654630777
226	20	Novel	Congruent	NoFeedback	NovCongDay1_dprime	0.29210462275989
227	21	Novel	Congruent	NoFeedback	NovCongDay1_dprime	0.835016307641337
228	22	Novel	Congruent	NoFeedback	NovCongDay1_dprime	0.705868829236518
229	23	Novel	Congruent	NoFeedback	NovCongDay1_dprime	1.06402446050012
230	24	Novel	Congruent	NoFeedback	NovCongDay1_dprime	0.6798359974320319
231	25	Novel	Congruent	NoFeedback	NovCongDay1_dprime	0.9184397611576121
232	26	Novel	Congruent	NoFeedback	NovCongDay1_dprime	0.394182473532927
233	27	Novel	Congruent	NoFeedback	NovCongDay1_dprime	0.5845959244369971
234	28	Novel	Congruent	NoFeedback	NovCongDay1_dprime	0.424631689067306
235	29	Novel	Congruent	NoFeedback	NovCongDay1_dprime	0.46659937661014295
236	30	Novel	Congruent	NoFeedback	NovCongDay1_dprime	0.604698825600096
237	31	Novel	Congruent	NoFeedback	NovCongDay1_dprime	0.45645000359617405
238	32	Novel	Congruent	NoFeedback	NovCongDay1_dprime	0.241269090908597
239	33	Novel	Congruent	NoFeedback	NovCongDay1_dprime	0.44882023038045205
240	34	Novel	Congruent	NoFeedback	NovCongDay1_dprime	0.8657486323201229
241	35	Novel	Congruent	NoFeedback	NovCongDay1_dprime	0.5735817179521501
242	36	Novel	Congruent	NoFeedback	NovCongDay1_dprime	0.0
243	38	Novel	Congruent	NoFeedback	NovCongDay1_dprime	0.8928031483079921
244	39	Novel	Congruent	NoFeedback	NovCongDay1_dprime	0.7236768776683441
245	40	Novel	Congruent	NoFeedback	NovCongDay1_dprime	0.857271778336865
246	41	Novel	Congruent	NoFeedback	NovCongDay1_dprime	0.22326302651561103
247	42	Novel	Congruent	NoFeedback	NovCongDay1_dprime	0.271718306442976
248	43	Novel	Congruent	NoFeedback	NovCongDay1_dprime	0.8979734650885071
249	44	Novel	Congruent	NoFeedback	NovCongDay1_dprime	0.13091484514382598
250	45	Novel	Congruent	NoFeedback	NovCongDay1_dprime	0.608534169511636
251	46	Novel	Congruent	NoFeedback	NovCongDay1_dprime	0.832388625917641
252	47	Novel	Congruent	NoFeedback	NovCongDay1_dprime	0.583747715372911
253	48	Novel	Congruent	NoFeedback	NovCongDay1_dprime	0.643036919000173
254	49	Novel	Congruent	NoFeedback	NovCongDay1_dprime	0.6348663563686109
255	50	Novel	Congruent	NoFeedback	NovCongDay1_dprime	0.77406137351278
256	51	Novel	Congruent	NoFeedback	NovCongDay1_dprime	0.71070576652449
257	52	Novel	Congruent	NoFeedback	NovCongDay1_dprime	0.8155342564542609
258	53	Novel	Congruent	NoFeedback	NovCongDay1_dprime	0.322836947438676
259	54	Novel	Congruent	NoFeedback	NovCongDay1_dprime	0.8877708793685649
260	55	Novel	Congruent	NoFeedback	NovCongDay1_dprime	0.604698825600096
261	56	Novel	Congruent	NoFeedback	NovCongDay1_dprime	0.318341983066226
262	57	Novel	Congruent	NoFeedback	NovCongDay1_dprime	0.8146299913244229
263	58	Novel	Congruent	NoFeedback	NovCongDay1_dprime	0.736537711025565
264	59	Novel	Congruent	NoFeedback	NovCongDay1_dprime	0.486949104627874
265	60	Novel	Congruent	NoFeedback	NovCongDay1_dprime	0.41403067745937494
266	61	Novel	Congruent	NoFeedback	NovCongDay1_dprime	0.7468037396352472
267	62	Novel	Congruent	NoFeedback	NovCongDay1_dprime	0.673202944400475
268	63	Novel	Congruent	NoFeedback	NovCongDay1_dprime	0.46659937661014295
269	64	Novel	Congruent	NoFeedback	NovCongDay1_dprime	0.424631689067306
270	65	Novel	Congruent	NoFeedback	NovCongDay1_dprime	0.695685098639547
271	66	Novel	Congruent	NoFeedback	NovCongDay1_dprime	0.638983385046015
272	67	Novel	Congruent	NoFeedback	NovCongDay1_dprime	0.669592278256359
273	68	Novel	Congruent	NoFeedback	NovCongDay1_dprime	0.30232719965332105
274	69	Novel	Congruent	NoFeedback	NovCongDay1_dprime	0.705868829236518
275	70	Novel	Congruent	NoFeedback	NovCongDay1_dprime	0.9925904490696908
276	71	Novel	Congruent	NoFeedback	NovCongDay1_dprime	0.550129695499614
277	72	Novel	Congruent	NoFeedback	NovCongDay1_dprime	0.857271778336865
278	73	Novel	Congruent	NoFeedback	NovCongDay1_dprime	0.48917476137105703
279	74	Novel	Congruent	NoFeedback	NovCongDay1_dprime	0.5845959244369971
280	75	Novel	Congruent	NoFeedback	NovCongDay1_dprime	0.408612376715927
281	76	Novel	Congruent	NoFeedback	NovCongDay1_dprime	0.614356608583256
282	77	Novel	Congruent	NoFeedback	NovCongDay1_dprime	0.352862694638628
283	78	Novel	Congruent	NoFeedback	NovCongDay1_dprime	0.5580602362437671
284	79	Novel	Congruent	NoFeedback	NovCongDay1_dprime	0.266838202858734
285	80	Novel	Congruent	NoFeedback	NovCongDay1_dprime	0.40431631863257705
286	81	Novel	Congruent	NoFeedback	NovCongDay1_dprime	0.6186680146112851
287	82	Novel	Congruent	NoFeedback	NovCongDay1_dprime	0.8516479146731891
288	83	Novel	Congruent	NoFeedback	NovCongDay1_dprime	0.7210112994536071
289	84	Novel	Congruent	NoFeedback	NovCongDay1_dprime	0.6798359974320319
290	85	Novel	Congruent	NoFeedback	NovCongDay1_dprime	0.764309823799693
291	86	Novel	Congruent	NoFeedback	NovCongDay1_dprime	0.669592278256359
292	87	Novel	Congruent	NoFeedback	NovCongDay1_dprime	0.550129695499614
293	88	Novel	Congruent	NoFeedback	NovCongDay1_dprime	0.93331180269943
294	89	Novel	Congruent	NoFeedback	NovCongDay1_dprime	0.3731780650733571
295	90	Novel	Congruent	NoFeedback	NovCongDay1_dprime	0.522979333003446
296	91	Novel	Congruent	NoFeedback	NovCongDay1_dprime	0.21192016024212604
297	92	Novel	Congruent	NoFeedback	NovCongDay1_dprime	0.42609072221870503
298	93	Novel	Congruent	NoFeedback	NovCongDay1_dprime	0.46261671290613793
299	94	Novel	Congruent	NoFeedback	NovCongDay1_dprime	0.553298499838532
300	95	Novel	Congruent	NoFeedback	NovCongDay1_dprime	0.638983385046015
301	96	Novel	Congruent	NoFeedback	NovCongDay1_dprime	0.876038154575962
302	97	Novel	Congruent	NoFeedback	NovCongDay1_dprime	0.6530848210931329
303	98	Novel	Congruent	NoFeedback	NovCongDay1_dprime	0.9231624296854619
304	99	Novel	Congruent	NoFeedback	NovCongDay1_dprime	0.394182473532927
305	100	Novel	Congruent	NoFeedback	NovCongDay1_dprime	0.908196041981938
306	101	Novel	Congruent	NoFeedback	NovCongDay1_dprime	0.332729610459621
307	102	Novel	Congruent	NoFeedback	NovCongDay1_dprime	0.763955339512224
308	103	Novel	Congruent	NoFeedback	NovCongDay1_dprime	0.628817387625254
309	104	Novel	Congruent	NoFeedback	NovCongDay1_dprime	0.46261671290613793
310	105	Novel	Congruent	NoFeedback	NovCongDay1_dprime	1.01290581950442
311	106	Novel	Congruent	NoFeedback	NovCongDay1_dprime	0.30199728578083507
312	1	Novel	Incongruent	NoFeedback	NovIncongDay1_dprime	0.231267528388832
313	2	Novel	Incongruent	NoFeedback	NovIncongDay1_dprime	0.7777476158438399
314	3	Novel	Incongruent	NoFeedback	NovIncongDay1_dprime	0.5735817179521501
315	4	Novel	Incongruent	NoFeedback	NovIncongDay1_dprime	0.46659937661014295
316	5	Novel	Incongruent	NoFeedback	NovIncongDay1_dprime	0.908196041981938
317	6	Novel	Incongruent	NoFeedback	NovIncongDay1_dprime	0.394182473532927
318	7	Novel	Incongruent	NoFeedback	NovIncongDay1_dprime	0.7745124095196361
319	8	Novel	Incongruent	NoFeedback	NovIncongDay1_dprime	0.902909182308548
320	9	Novel	Incongruent	NoFeedback	NovIncongDay1_dprime	0.22121252931869398
321	10	Novel	Incongruent	NoFeedback	NovIncongDay1_dprime	0.7160714149564609
322	11	Novel	Incongruent	NoFeedback	NovIncongDay1_dprime	0.414465691646545
323	12	Novel	Incongruent	NoFeedback	NovIncongDay1_dprime	0.512896849952875
324	13	Novel	Incongruent	NoFeedback	NovIncongDay1_dprime	0.5634323449381821
325	14	Novel	Incongruent	NoFeedback	NovIncongDay1_dprime	0.5946438265299571
326	15	Novel	Incongruent	NoFeedback	NovIncongDay1_dprime	0.7847349864130669
327	16	Novel	Incongruent	NoFeedback	NovIncongDay1_dprime	0.825848474681199
328	18	Novel	Incongruent	NoFeedback	NovIncongDay1_dprime	1.02554031732448
329	19	Novel	Incongruent	NoFeedback	NovIncongDay1_dprime	0.28168518361664
330	20	Novel	Incongruent	NoFeedback	NovIncongDay1_dprime	0.39356438139027095
331	21	Novel	Incongruent	NoFeedback	NovIncongDay1_dprime	0.794978705588741
332	22	Novel	Incongruent	NoFeedback	NovIncongDay1_dprime	0.743960095781962
333	23	Novel	Incongruent	NoFeedback	NovIncongDay1_dprime	1.00488596337173
334	24	Novel	Incongruent	NoFeedback	NovIncongDay1_dprime	0.6348663563686109
335	25	Novel	Incongruent	NoFeedback	NovIncongDay1_dprime	0.690102026041714
336	26	Novel	Incongruent	NoFeedback	NovIncongDay1_dprime	0.614356608583256
337	27	Novel	Incongruent	NoFeedback	NovIncongDay1_dprime	0.5782150026765501
338	28	Novel	Incongruent	NoFeedback	NovIncongDay1_dprime	0.754126093202723
339	29	Novel	Incongruent	NoFeedback	NovIncongDay1_dprime	0.713557475391079
340	30	Novel	Incongruent	NoFeedback	NovIncongDay1_dprime	0.6551164808279039
341	31	Novel	Incongruent	NoFeedback	NovIncongDay1_dprime	0.271579149616084
342	32	Novel	Incongruent	NoFeedback	NovIncongDay1_dprime	0.0407016867516428
343	33	Novel	Incongruent	NoFeedback	NovIncongDay1_dprime	0.438757106143249
344	34	Novel	Incongruent	NoFeedback	NovIncongDay1_dprime	0.583747715372911
345	35	Novel	Incongruent	NoFeedback	NovIncongDay1_dprime	0.7160714149564609
346	36	Novel	Incongruent	NoFeedback	NovIncongDay1_dprime	0.22121252931869398
347	38	Novel	Incongruent	NoFeedback	NovIncongDay1_dprime	0.8370185309599509
348	39	Novel	Incongruent	NoFeedback	NovIncongDay1_dprime	0.7160714149564609
349	40	Novel	Incongruent	NoFeedback	NovIncongDay1_dprime	0.7841807757900441
350	41	Novel	Incongruent	NoFeedback	NovIncongDay1_dprime	0.328374716631005
351	42	Novel	Incongruent	NoFeedback	NovIncongDay1_dprime	0.44501800538422
352	43	Novel	Incongruent	NoFeedback	NovIncongDay1_dprime	1.03329213582133
353	44	Novel	Incongruent	NoFeedback	NovIncongDay1_dprime	0.39857560343616205
354	45	Novel	Incongruent	NoFeedback	NovIncongDay1_dprime	0.43481541966427706
355	46	Novel	Incongruent	NoFeedback	NovIncongDay1_dprime	0.8817380437578821
356	47	Novel	Incongruent	NoFeedback	NovIncongDay1_dprime	0.7160714149564609
357	48	Novel	Incongruent	NoFeedback	NovIncongDay1_dprime	0.6551164808279039
358	49	Novel	Incongruent	NoFeedback	NovIncongDay1_dprime	0.5603522723930451
359	50	Novel	Incongruent	NoFeedback	NovIncongDay1_dprime	0.628817387625254
360	51	Novel	Incongruent	NoFeedback	NovIncongDay1_dprime	0.794978705588741
361	52	Novel	Incongruent	NoFeedback	NovIncongDay1_dprime	0.669592278256359
362	53	Novel	Incongruent	NoFeedback	NovIncongDay1_dprime	0.767407480118023
363	54	Novel	Incongruent	NoFeedback	NovIncongDay1_dprime	1.01290581950442
364	55	Novel	Incongruent	NoFeedback	NovIncongDay1_dprime	0.6753697282048179
365	56	Novel	Incongruent	NoFeedback	NovIncongDay1_dprime	0.656148979375354
366	57	Novel	Incongruent	NoFeedback	NovIncongDay1_dprime	0.5634323449381821
367	58	Novel	Incongruent	NoFeedback	NovIncongDay1_dprime	0.669592278256359
368	59	Novel	Incongruent	NoFeedback	NovIncongDay1_dprime	0.550129695499614
369	60	Novel	Incongruent	NoFeedback	NovIncongDay1_dprime	0.550129695499614
370	61	Novel	Incongruent	NoFeedback	NovIncongDay1_dprime	0.42609072221870503
371	62	Novel	Incongruent	NoFeedback	NovIncongDay1_dprime	0.902909182308548
372	63	Novel	Incongruent	NoFeedback	NovIncongDay1_dprime	0.6186680146112851
373	64	Novel	Incongruent	NoFeedback	NovIncongDay1_dprime	0.6491671156429849
374	65	Novel	Incongruent	NoFeedback	NovIncongDay1_dprime	0.522979333003446
375	66	Novel	Incongruent	NoFeedback	NovIncongDay1_dprime	0.9130285845858119
376	67	Novel	Incongruent	NoFeedback	NovIncongDay1_dprime	0.825848474681199
377	68	Novel	Incongruent	NoFeedback	NovIncongDay1_dprime	0.628817387625254
378	69	Novel	Incongruent	NoFeedback	NovIncongDay1_dprime	0.7847349864130669
379	70	Novel	Incongruent	NoFeedback	NovIncongDay1_dprime	0.974086693330535
380	71	Novel	Incongruent	NoFeedback	NovIncongDay1_dprime	0.6753697282048179
381	72	Novel	Incongruent	NoFeedback	NovIncongDay1_dprime	0.271579149616084
382	73	Novel	Incongruent	NoFeedback	NovIncongDay1_dprime	0.352862694638628
383	74	Novel	Incongruent	NoFeedback	NovIncongDay1_dprime	0.111532042012592
384	75	Novel	Incongruent	NoFeedback	NovIncongDay1_dprime	0.512896849952875
385	76	Novel	Incongruent	NoFeedback	NovIncongDay1_dprime	0.805244734198423
386	77	Novel	Incongruent	NoFeedback	NovIncongDay1_dprime	0.638983385046015
387	78	Novel	Incongruent	NoFeedback	NovIncongDay1_dprime	0.42870210707310996
388	79	Novel	Incongruent	NoFeedback	NovIncongDay1_dprime	0.7664979745690441
389	80	Novel	Incongruent	NoFeedback	NovIncongDay1_dprime	0.31354251486475604
390	81	Novel	Incongruent	NoFeedback	NovIncongDay1_dprime	0.5195773817619389
391	82	Novel	Incongruent	NoFeedback	NovIncongDay1_dprime	0.6232910350399661
392	83	Novel	Incongruent	NoFeedback	NovIncongDay1_dprime	0.7621665330884101
393	84	Novel	Incongruent	NoFeedback	NovIncongDay1_dprime	0.669592278256359
394	85	Novel	Incongruent	NoFeedback	NovIncongDay1_dprime	0.7847349864130669
395	86	Novel	Incongruent	NoFeedback	NovIncongDay1_dprime	0.8775871487715942
396	87	Novel	Incongruent	NoFeedback	NovIncongDay1_dprime	0.659369701362928
397	88	Novel	Incongruent	NoFeedback	NovIncongDay1_dprime	0.6433454053929171
398	89	Novel	Incongruent	NoFeedback	NovIncongDay1_dprime	0.6186680146112851
399	90	Novel	Incongruent	NoFeedback	NovIncongDay1_dprime	0.130517797131659
400	91	Novel	Incongruent	NoFeedback	NovIncongDay1_dprime	0.527894210843465
401	92	Novel	Incongruent	NoFeedback	NovIncongDay1_dprime	0.34264011774519704
402	93	Novel	Incongruent	NoFeedback	NovIncongDay1_dprime	0.683275227782686
403	94	Novel	Incongruent	NoFeedback	NovIncongDay1_dprime	0.628817387625254
404	95	Novel	Incongruent	NoFeedback	NovIncongDay1_dprime	0.736537711025565
405	96	Novel	Incongruent	NoFeedback	NovIncongDay1_dprime	0.9389953120231321
406	97	Novel	Incongruent	NoFeedback	NovIncongDay1_dprime	0.39745548529259206
407	98	Novel	Incongruent	NoFeedback	NovIncongDay1_dprime	0.9925904490696908
408	99	Novel	Incongruent	NoFeedback	NovIncongDay1_dprime	0.44882023038045205
409	100	Novel	Incongruent	NoFeedback	NovIncongDay1_dprime	0.824813721921394
410	101	Novel	Incongruent	NoFeedback	NovIncongDay1_dprime	0.49248007014195794
411	102	Novel	Incongruent	NoFeedback	NovIncongDay1_dprime	0.763955339512224
412	103	Novel	Incongruent	NoFeedback	NovIncongDay1_dprime	0.9843304125062091
413	104	Novel	Incongruent	NoFeedback	NovIncongDay1_dprime	0.5634323449381821
414	105	Novel	Incongruent	NoFeedback	NovIncongDay1_dprime	1.06402446050012
415	106	Novel	Incongruent	NoFeedback	NovIncongDay1_dprime	0.32553515845234804
416	1	Familiar	Congruent	Feedback	FamCongDay2_dprime	0.754126093202723
417	2	Familiar	Congruent	Feedback	FamCongDay2_dprime	0.9389953120231321
418	3	Familiar	Congruent	Feedback	FamCongDay2_dprime	0.54848775550938
419	4	Familiar	Congruent	Feedback	FamCongDay2_dprime	0.7236768776683441
420	5	Familiar	Congruent	Feedback	FamCongDay2_dprime	0.7777476158438399
421	6	Familiar	Congruent	Feedback	FamCongDay2_dprime	0.527884015026604
422	7	Familiar	Congruent	Feedback	FamCongDay2_dprime	0.614356608583256
423	8	Familiar	Congruent	Feedback	FamCongDay2_dprime	0.8877708793685649
424	9	Familiar	Congruent	Feedback	FamCongDay2_dprime	0.18086955158459697
425	10	Familiar	Congruent	Feedback	FamCongDay2_dprime	0.9389953120231321
426	11	Familiar	Congruent	Feedback	FamCongDay2_dprime	0.690102026041714
427	12	Familiar	Congruent	Feedback	FamCongDay2_dprime	0.825848474681199
428	13	Familiar	Congruent	Feedback	FamCongDay2_dprime	0.669592278256359
429	14	Familiar	Congruent	Feedback	FamCongDay2_dprime	0.5735817179521501
430	15	Familiar	Congruent	Feedback	FamCongDay2_dprime	0.34264011774519704
431	16	Familiar	Congruent	Feedback	FamCongDay2_dprime	0.757093261891085
432	18	Familiar	Congruent	Feedback	FamCongDay2_dprime	0.836188610407016
433	19	Familiar	Congruent	Feedback	FamCongDay2_dprime	0.151739895677117
434	20	Familiar	Congruent	Feedback	FamCongDay2_dprime	0.373372442423983
435	21	Familiar	Congruent	Feedback	FamCongDay2_dprime	0.517617986416921
436	22	Familiar	Congruent	Feedback	FamCongDay2_dprime	0.690102026041714
437	23	Familiar	Congruent	Feedback	FamCongDay2_dprime	1.02554031732448
438	24	Familiar	Congruent	Feedback	FamCongDay2_dprime	0.40378695828370204
439	25	Familiar	Congruent	Feedback	FamCongDay2_dprime	0.805244734198423
440	26	Familiar	Congruent	Feedback	FamCongDay2_dprime	0.669592278256359
441	27	Familiar	Congruent	Feedback	FamCongDay2_dprime	0.867421151350833
442	28	Familiar	Congruent	Feedback	FamCongDay2_dprime	0.705868829236518
443	29	Familiar	Congruent	Feedback	FamCongDay2_dprime	0.886352372802899
444	30	Familiar	Congruent	Feedback	FamCongDay2_dprime	0.943477800120191
445	31	Familiar	Congruent	Feedback	FamCongDay2_dprime	0.6186680146112851
446	32	Familiar	Congruent	Feedback	FamCongDay2_dprime	0.271579149616084
447	33	Familiar	Congruent	Feedback	FamCongDay2_dprime	0.43619675621926
448	34	Familiar	Congruent	Feedback	FamCongDay2_dprime	0.9493095302500699
449	35	Familiar	Congruent	Feedback	FamCongDay2_dprime	0.757093261891085
450	36	Familiar	Congruent	Feedback	FamCongDay2_dprime	0.20086744102294002
451	38	Familiar	Congruent	Feedback	FamCongDay2_dprime	0.974086693330535
452	39	Familiar	Congruent	Feedback	FamCongDay2_dprime	0.9493095302500699
453	40	Familiar	Congruent	Feedback	FamCongDay2_dprime	0.726293991849891
454	41	Familiar	Congruent	Feedback	FamCongDay2_dprime	0.293463913320768
455	42	Familiar	Congruent	Feedback	FamCongDay2_dprime	0.6798359974320319
456	43	Familiar	Congruent	Feedback	FamCongDay2_dprime	0.9184397611576121
457	44	Familiar	Congruent	Feedback	FamCongDay2_dprime	0.5735817179521501
458	45	Familiar	Congruent	Feedback	FamCongDay2_dprime	0.30193843099355394
459	46	Familiar	Congruent	Feedback	FamCongDay2_dprime	0.9389953120231321
460	47	Familiar	Congruent	Feedback	FamCongDay2_dprime	0.5431790975612679
461	48	Familiar	Congruent	Feedback	FamCongDay2_dprime	0.705868829236518
462	49	Familiar	Congruent	Feedback	FamCongDay2_dprime	0.825848474681199
463	50	Familiar	Congruent	Feedback	FamCongDay2_dprime	0.733810722767994
464	51	Familiar	Congruent	Feedback	FamCongDay2_dprime	0.5911515424342378
465	52	Familiar	Congruent	Feedback	FamCongDay2_dprime	0.7160714149564609
466	53	Familiar	Congruent	Feedback	FamCongDay2_dprime	0.665810232577205
467	54	Familiar	Congruent	Feedback	FamCongDay2_dprime	0.8554826037104408
468	55	Familiar	Congruent	Feedback	FamCongDay2_dprime	0.5939314459698821
469	56	Familiar	Congruent	Feedback	FamCongDay2_dprime	0.5431790975612679
470	57	Familiar	Congruent	Feedback	FamCongDay2_dprime	0.764309823799693
471	58	Familiar	Congruent	Feedback	FamCongDay2_dprime	0.876038154575962
472	59	Familiar	Congruent	Feedback	FamCongDay2_dprime	0.373372442423983
473	60	Familiar	Congruent	Feedback	FamCongDay2_dprime	0.35378082364727004
474	61	Familiar	Congruent	Feedback	FamCongDay2_dprime	0.736537711025565
475	62	Familiar	Congruent	Feedback	FamCongDay2_dprime	0.7745124095196361
476	63	Familiar	Congruent	Feedback	FamCongDay2_dprime	0.527884015026604
477	64	Familiar	Congruent	Feedback	FamCongDay2_dprime	0.352862694638628
478	65	Familiar	Congruent	Feedback	FamCongDay2_dprime	0.845238884534768
479	66	Familiar	Congruent	Feedback	FamCongDay2_dprime	0.7841807757900441
480	67	Familiar	Congruent	Feedback	FamCongDay2_dprime	0.7468037396352472
481	68	Familiar	Congruent	Feedback	FamCongDay2_dprime	0.8877708793685649
482	69	Familiar	Congruent	Feedback	FamCongDay2_dprime	0.805244734198423
483	70	Familiar	Congruent	Feedback	FamCongDay2_dprime	1.0846282009829
484	71	Familiar	Congruent	Feedback	FamCongDay2_dprime	0.8877708793685649
485	72	Familiar	Congruent	Feedback	FamCongDay2_dprime	0.31354251486475604
486	73	Familiar	Congruent	Feedback	FamCongDay2_dprime	0.0
487	74	Familiar	Congruent	Feedback	FamCongDay2_dprime	0.41865420498015
488	75	Familiar	Congruent	Feedback	FamCongDay2_dprime	0.7236768776683441
489	76	Familiar	Congruent	Feedback	FamCongDay2_dprime	1.09496833670871
490	77	Familiar	Congruent	Feedback	FamCongDay2_dprime	0.393976182906759
491	78	Familiar	Congruent	Feedback	FamCongDay2_dprime	0.9389953120231321
492	79	Familiar	Congruent	Feedback	FamCongDay2_dprime	0.564517322893009
493	80	Familiar	Congruent	Feedback	FamCongDay2_dprime	0.322503413261158
494	81	Familiar	Congruent	Feedback	FamCongDay2_dprime	0.352862694638628
495	82	Familiar	Congruent	Feedback	FamCongDay2_dprime	0.7160714149564609
496	83	Familiar	Congruent	Feedback	FamCongDay2_dprime	0.781425821843958
497	84	Familiar	Congruent	Feedback	FamCongDay2_dprime	0.736537711025565
498	85	Familiar	Congruent	Feedback	FamCongDay2_dprime	0.9184397611576121
499	86	Familiar	Congruent	Feedback	FamCongDay2_dprime	0.7847349864130669
500	87	Familiar	Congruent	Feedback	FamCongDay2_dprime	0.0402078536645249
501	88	Familiar	Congruent	Feedback	FamCongDay2_dprime	0.690102026041714
502	89	Familiar	Congruent	Feedback	FamCongDay2_dprime	0.34264011774519704
503	90	Familiar	Congruent	Feedback	FamCongDay2_dprime	0.322503413261158
504	91	Familiar	Congruent	Feedback	FamCongDay2_dprime	0.499294163648321
505	92	Familiar	Congruent	Feedback	FamCongDay2_dprime	0.40378695828370204
506	93	Familiar	Congruent	Feedback	FamCongDay2_dprime	0.6798359974320319
507	94	Familiar	Congruent	Feedback	FamCongDay2_dprime	0.757093261891085
508	95	Familiar	Congruent	Feedback	FamCongDay2_dprime	0.45524058227765096
509	96	Familiar	Congruent	Feedback	FamCongDay2_dprime	0.9843304125062091
510	97	Familiar	Congruent	Feedback	FamCongDay2_dprime	0.608534169511636
511	98	Familiar	Congruent	Feedback	FamCongDay2_dprime	0.9184397611576121
512	99	Familiar	Congruent	Feedback	FamCongDay2_dprime	0.17076351758404099
513	100	Familiar	Congruent	Feedback	FamCongDay2_dprime	1.00488596337173
514	101	Familiar	Congruent	Feedback	FamCongDay2_dprime	0.6530848210931329
515	102	Familiar	Congruent	Feedback	FamCongDay2_dprime	0.886352372802899
516	103	Familiar	Congruent	Feedback	FamCongDay2_dprime	0.824813721921394
517	104	Familiar	Congruent	Feedback	FamCongDay2_dprime	0.6246003277589289
518	105	Familiar	Congruent	Feedback	FamCongDay2_dprime	0.705868829236518
519	106	Familiar	Congruent	Feedback	FamCongDay2_dprime	0.5580602362437671
520	1	Familiar	Incongruent	Feedback	FamIncongDay2_dprime	0.231149688631333
521	2	Familiar	Incongruent	Feedback	FamIncongDay2_dprime	0.886352372802899
522	3	Familiar	Incongruent	Feedback	FamIncongDay2_dprime	0.659369701362928
523	4	Familiar	Incongruent	Feedback	FamIncongDay2_dprime	0.48603985231884494
524	5	Familiar	Incongruent	Feedback	FamIncongDay2_dprime	0.517617986416921
525	6	Familiar	Incongruent	Feedback	FamIncongDay2_dprime	0.45524058227765096
526	7	Familiar	Incongruent	Feedback	FamIncongDay2_dprime	0.6041340316898249
527	8	Familiar	Incongruent	Feedback	FamIncongDay2_dprime	1.04351471271477
528	9	Familiar	Incongruent	Feedback	FamIncongDay2_dprime	0.0906817869323937
529	10	Familiar	Incongruent	Feedback	FamIncongDay2_dprime	0.7468037396352472
530	11	Familiar	Incongruent	Feedback	FamIncongDay2_dprime	0.550129695499614
531	12	Familiar	Incongruent	Feedback	FamIncongDay2_dprime	0.9493095302500699
532	13	Familiar	Incongruent	Feedback	FamIncongDay2_dprime	0.6855191012187859
533	14	Familiar	Incongruent	Feedback	FamIncongDay2_dprime	0.539927109779671
534	15	Familiar	Incongruent	Feedback	FamIncongDay2_dprime	0.736537711025565
535	16	Familiar	Incongruent	Feedback	FamIncongDay2_dprime	0.886352372802899
536	18	Familiar	Incongruent	Feedback	FamIncongDay2_dprime	0.836188610407016
537	19	Familiar	Incongruent	Feedback	FamIncongDay2_dprime	0.507374267241248
538	20	Familiar	Incongruent	Feedback	FamIncongDay2_dprime	0.465484301453324
539	21	Familiar	Incongruent	Feedback	FamIncongDay2_dprime	0.43481541966427706
540	22	Familiar	Incongruent	Feedback	FamIncongDay2_dprime	0.71070576652449
541	23	Familiar	Incongruent	Feedback	FamIncongDay2_dprime	1.09496833670871
542	24	Familiar	Incongruent	Feedback	FamIncongDay2_dprime	0.47575033006300604
543	25	Familiar	Incongruent	Feedback	FamIncongDay2_dprime	0.9389953120231321
544	26	Familiar	Incongruent	Feedback	FamIncongDay2_dprime	0.18086955158459697
545	27	Familiar	Incongruent	Feedback	FamIncongDay2_dprime	0.628817387625254
546	28	Familiar	Incongruent	Feedback	FamIncongDay2_dprime	0.726293991849891
547	29	Familiar	Incongruent	Feedback	FamIncongDay2_dprime	0.908196041981938
548	30	Familiar	Incongruent	Feedback	FamIncongDay2_dprime	0.509428008747971
549	31	Familiar	Incongruent	Feedback	FamIncongDay2_dprime	0.835016307641337
550	32	Familiar	Incongruent	Feedback	FamIncongDay2_dprime	0.0810345960170071
551	33	Familiar	Incongruent	Feedback	FamIncongDay2_dprime	0.5431790975612679
552	34	Familiar	Incongruent	Feedback	FamIncongDay2_dprime	0.705868829236518
553	35	Familiar	Incongruent	Feedback	FamIncongDay2_dprime	1.01520018159867
554	36	Familiar	Incongruent	Feedback	FamIncongDay2_dprime	0.0301447294273214
555	38	Familiar	Incongruent	Feedback	FamIncongDay2_dprime	0.7943146208896941
556	39	Familiar	Incongruent	Feedback	FamIncongDay2_dprime	0.7847349864130669
557	40	Familiar	Incongruent	Feedback	FamIncongDay2_dprime	0.9184397611576121
558	41	Familiar	Incongruent	Feedback	FamIncongDay2_dprime	0.23197755576204002
559	42	Familiar	Incongruent	Feedback	FamIncongDay2_dprime	0.767407480118023
560	43	Familiar	Incongruent	Feedback	FamIncongDay2_dprime	0.9287057897672941
561	44	Familiar	Incongruent	Feedback	FamIncongDay2_dprime	0.130451896356789
562	45	Familiar	Incongruent	Feedback	FamIncongDay2_dprime	0.5297433791827
563	46	Familiar	Incongruent	Feedback	FamIncongDay2_dprime	1.07431398275596
564	47	Familiar	Incongruent	Feedback	FamIncongDay2_dprime	0.7003915482975529
565	48	Familiar	Incongruent	Feedback	FamIncongDay2_dprime	0.7847349864130669
566	49	Familiar	Incongruent	Feedback	FamIncongDay2_dprime	0.9287057897672941
567	50	Familiar	Incongruent	Feedback	FamIncongDay2_dprime	0.6491671156429849
568	51	Familiar	Incongruent	Feedback	FamIncongDay2_dprime	0.6041340316898249
569	52	Familiar	Incongruent	Feedback	FamIncongDay2_dprime	0.43481541966427706
570	53	Familiar	Incongruent	Feedback	FamIncongDay2_dprime	0.527884015026604
571	54	Familiar	Incongruent	Feedback	FamIncongDay2_dprime	0.6041340316898249
572	55	Familiar	Incongruent	Feedback	FamIncongDay2_dprime	0.754126093202723
573	56	Familiar	Incongruent	Feedback	FamIncongDay2_dprime	0.31354251486475604
574	57	Familiar	Incongruent	Feedback	FamIncongDay2_dprime	0.8146299913244229
575	58	Familiar	Incongruent	Feedback	FamIncongDay2_dprime	1.01520018159867
576	59	Familiar	Incongruent	Feedback	FamIncongDay2_dprime	0.736537711025565
577	60	Familiar	Incongruent	Feedback	FamIncongDay2_dprime	0.39356438139027095
578	61	Familiar	Incongruent	Feedback	FamIncongDay2_dprime	0.876038154575962
579	62	Familiar	Incongruent	Feedback	FamIncongDay2_dprime	0.7847349864130669
580	63	Familiar	Incongruent	Feedback	FamIncongDay2_dprime	0.5939314459698821
581	64	Familiar	Incongruent	Feedback	FamIncongDay2_dprime	0.373372442423983
582	65	Familiar	Incongruent	Feedback	FamIncongDay2_dprime	0.8155342564542609
583	66	Familiar	Incongruent	Feedback	FamIncongDay2_dprime	0.794978705588741
584	67	Familiar	Incongruent	Feedback	FamIncongDay2_dprime	0.757093261891085
585	68	Familiar	Incongruent	Feedback	FamIncongDay2_dprime	0.845238884534768
586	69	Familiar	Incongruent	Feedback	FamIncongDay2_dprime	0.9389953120231321
587	70	Familiar	Incongruent	Feedback	FamIncongDay2_dprime	1.0846282009829
588	71	Familiar	Incongruent	Feedback	FamIncongDay2_dprime	0.726293991849891
589	72	Familiar	Incongruent	Feedback	FamIncongDay2_dprime	0.332609447261714
590	73	Familiar	Incongruent	Feedback	FamIncongDay2_dprime	0.36310641381430103
591	74	Familiar	Incongruent	Feedback	FamIncongDay2_dprime	0.0803793501585193
592	75	Familiar	Incongruent	Feedback	FamIncongDay2_dprime	0.8146299913244229
593	76	Familiar	Incongruent	Feedback	FamIncongDay2_dprime	1.0846282009829
594	77	Familiar	Incongruent	Feedback	FamIncongDay2_dprime	0.40378695828370204
595	78	Familiar	Incongruent	Feedback	FamIncongDay2_dprime	0.835016307641337
596	79	Familiar	Incongruent	Feedback	FamIncongDay2_dprime	0.7135887192148331
597	80	Familiar	Incongruent	Feedback	FamIncongDay2_dprime	0.33243753202525395
598	81	Familiar	Incongruent	Feedback	FamIncongDay2_dprime	0.6246003277589289
599	82	Familiar	Incongruent	Feedback	FamIncongDay2_dprime	0.845238884534768
600	83	Familiar	Incongruent	Feedback	FamIncongDay2_dprime	0.8115371569527249
601	84	Familiar	Incongruent	Feedback	FamIncongDay2_dprime	1.01520018159867
602	85	Familiar	Incongruent	Feedback	FamIncongDay2_dprime	1.06402446050012
603	86	Familiar	Incongruent	Feedback	FamIncongDay2_dprime	0.9843304125062091
604	87	Familiar	Incongruent	Feedback	FamIncongDay2_dprime	0.40378695828370204
605	88	Familiar	Incongruent	Feedback	FamIncongDay2_dprime	0.486949104627874
606	89	Familiar	Incongruent	Feedback	FamIncongDay2_dprime	0.659369701362928
607	90	Familiar	Incongruent	Feedback	FamIncongDay2_dprime	0.479068727370501
608	91	Familiar	Incongruent	Feedback	FamIncongDay2_dprime	0.46659937661014295
609	92	Familiar	Incongruent	Feedback	FamIncongDay2_dprime	0.231149688631333
610	93	Familiar	Incongruent	Feedback	FamIncongDay2_dprime	0.6798359974320319
611	94	Familiar	Incongruent	Feedback	FamIncongDay2_dprime	0.7160714149564609
612	95	Familiar	Incongruent	Feedback	FamIncongDay2_dprime	0.7847349864130669
613	96	Familiar	Incongruent	Feedback	FamIncongDay2_dprime	0.886352372802899
614	97	Familiar	Incongruent	Feedback	FamIncongDay2_dprime	0.93331180269943
615	98	Familiar	Incongruent	Feedback	FamIncongDay2_dprime	0.9536615307171609
616	99	Familiar	Incongruent	Feedback	FamIncongDay2_dprime	0.40591450861086703
617	100	Familiar	Incongruent	Feedback	FamIncongDay2_dprime	0.9843304125062091
618	101	Familiar	Incongruent	Feedback	FamIncongDay2_dprime	0.47575033006300604
619	102	Familiar	Incongruent	Feedback	FamIncongDay2_dprime	0.8155342564542609
620	103	Familiar	Incongruent	Feedback	FamIncongDay2_dprime	0.876038154575962
621	104	Familiar	Incongruent	Feedback	FamIncongDay2_dprime	0.695685098639547
622	105	Familiar	Incongruent	Feedback	FamIncongDay2_dprime	0.9945964411158911
623	106	Familiar	Incongruent	Feedback	FamIncongDay2_dprime	0.3833617956703279
