# Supplementary material for: Habit Expression and Disruption as a Function of Attention-Deficit/Hyperactivity Disorder Symptomology
Source: Front Psychol. 2019 Sep 3;10:1997. doi: 10.3389/fpsyg.2019.01997 (PMC6733985; doi:10.3389/fpsyg.2019.01997)
Supplement: Supplementary file 1 [file Data_Sheet_1.ZIP › Exp8_GoRT_Full.csv]

StimulusType	FeedbackCond	Subject	RT_Diff	Cong_Order	Stim_Order	ASRS_A	ASRS_B	ASRS_Total	COHS	Age	Gender	Drive	Diagnosis
Familiar	Feedback	1	-8.578557312	0	0	18	10	28	131	23	0	84	0
Familiar	Feedback	2	1.254792826	0	0	12	10	22	111	19	0	16	0
Familiar	Feedback	3	6.509778637	1	0	10	10	20	83	19	1	1	0
Familiar	Feedback	4	-16.39417565	1	0	18	13	31	105	18	0	18	0
Familiar	Feedback	5	-5.942083333	2	1	22	17	39	77	20	0	27	1
Familiar	Feedback	6	-14.27154639	2	1	8	18	26	105	18	1	6	0
Familiar	Feedback	7	-7.194400896	1	1	19	16	35	101	18	1	12	0
Familiar	Feedback	8	-0.032597623	3	1	13	12	27	101	20	1	36	0
Familiar	Feedback	9	-27.65692033	0	0	14	6	20	94	22	1	0	0
Familiar	Feedback	10	18.85672207	0	0	23	13	36	106	18	1	0	0
Familiar	Feedback	11	3.638078526	3	0	20	17	37	112	18	0	0	0
Familiar	Feedback	12	3.767676768	1	0	16	15	31	101	18	1	18	0
Familiar	Feedback	13	1.07761712	2	1	12	8	20	115	23	1	72	0
Familiar	Feedback	14	-28.7302375	2	1	14	13	27	104	18	1	3	0
Familiar	Feedback	15	5.730053191	3	1	13	12	25	109	20	1	0	0
Familiar	Feedback	16	-17.46516182	3	1	15	4	19	77	19	0	0	0
Familiar	Feedback	18	24.23105263	0	0	12	9	21	89	18	0	15	0
Familiar	Feedback	19	12.45614035	1	0	18	15	33	101	18	1	7	0
Familiar	Feedback	20	-11.01640616	1	0	20	11	31	108	19	0	30	0
Familiar	Feedback	21	1.519570707	2	1	14	9	23	81	18	1	18	0
Familiar	Feedback	22	20.07340206	2	1	15	13	28	99	18	1	8	0
Familiar	Feedback	23	-18.50329897	3	1	16	12	28	102	18	1	27	0
Familiar	Feedback	24	4.488506982	3	1	15	20	35	116	23	0	81	0
Familiar	Feedback	25	7.38425492	0	0	15	11	26	113	18	1	16	0
Familiar	Feedback	26	6.193869289	0	0	12	18	30	112	18	0	20	0
Familiar	Feedback	27	-23.74077501	1	0	10	8	18	101	18	1	7	0
Familiar	Feedback	28	10.18064516	1	0	9	10	19	90	18	0	8	0
Familiar	Feedback	29	30.32828283	2	1	6	5	11	98	18	1	12	0
Familiar	Feedback	30	8.109389454	2	1	13	13	26	113	20	1	36	0
Familiar	Feedback	31	-31.82508961	3	1	16	7	23	96	18	1	12	0
Familiar	Feedback	32	23.85736677	3	1	15	10	25	98	18	0	16	0
Familiar	Feedback	33	-12.38978495	0	0	14	13	27	95	18	1	0	0
Familiar	Feedback	34	45.82828283	0	0	13	13	26	103	18	1	24	0
Familiar	Feedback	35	-15.91566265	1	0	26	23	49	95	18	1	4	0
Familiar	Feedback	36	82.77058824	1	0	18	15	33	101	19	1	36	0
Familiar	Feedback	38	8.4	2	1	16	14	30	108	19	1	0	0
Familiar	Feedback	39	-7.4375	3	1	25	15	40	112	18	1	12	0
Familiar	Feedback	40	4.821322537	3	1	8	12	20	86	20	0	36	0
Familiar	Feedback	41	-23.44431658	0	0	14	11	25	94	18	0	2	0
Familiar	Feedback	42	9.086232818	0	0	13	1	14	84	20	0	48	0
Familiar	Feedback	43	-17.84123996	1	0	18	7	25	119	21	1	60	0
Familiar	Feedback	44	-10.00071667	1	0	21	12	33	75	18	0	24	1
Familiar	Feedback	45	4.798185941	2	1	20	21	41	84	18	1	7	0
Familiar	Feedback	46	-37.71428571	2	1	21	11	32	96	19	1	0	0
Familiar	Feedback	47	44.65430622	3	1	9	8	17	93	18	1	26	0
Familiar	Feedback	48	-33.9685179	3	1	13	12	25	89	20	1	13	0
Familiar	Feedback	49	26.67709352	0	0	5	0	5	78	20	1	24	0
Familiar	Feedback	50	-47.7820331	0	0	18	17	35	108	18	1	6	0
Familiar	Feedback	51	10.25038402	1	0	11	8	19	98	18	1	0	0
Familiar	Feedback	52	-8.791840316	1	0	18	13	31	87	18	1	0	0
Familiar	Feedback	53	13.99361702	2	1	26	23	49	95	25	1	120	0
Familiar	Feedback	54	-8.814764493	2	1	12	16	28	114	18	1	6	0
Familiar	Feedback	55	34.33213859	3	1	18	15	33	84	19	1	10	0
Familiar	Feedback	56	10.52025692	2	1	13	16	29	107	19	1	36	0
Familiar	Feedback	57	-31.85467579	3	1	22	20	42	101	19	1	20	0
Familiar	Feedback	58	-0.480867347	0	0	16	16	32	89	25	1	72	0
Familiar	Feedback	59	-18.30489142	0	0	22	16	38	131	20	1	0	0
Familiar	Feedback	60	36.95102041	1	0	23	19	42	110	19	1	32	0
Familiar	Feedback	61	5.586513158	1	0	20	23	43	104	23	1	9	0
Familiar	Feedback	62	-32.09883322	3	1	14	0	14	99	45	1	300	1
Familiar	Feedback	63	-9.989690722	2	1	15	12	27	93	18	1	3	0
Familiar	Feedback	64	19.66208378	3	1	17	12	29	95	21	1	52	0
Familiar	Feedback	65	18.02807018	3	1	17	19	36	97	21	0	70	0
Familiar	Feedback	66	-55.17931667	0	0	20	9	29	96	18	1	3	0
Familiar	Feedback	67	26.75105806	0	0	13	16	29	108	18	0	0	0
Familiar	Feedback	68	-10.88062322	1	0	23	16	39	121	18	1	6	0
Familiar	Feedback	69	-4.483078205	1	0	19	20	39	80	18	0	4	0
Familiar	Feedback	70	14.37979798	2	1	16	13	29	99	18	1	12	0
Familiar	Feedback	71	-30.13880743	2	1	9	10	19	96	23	1	84	0
Familiar	Feedback	72	-20.96064815	3	1	23	20	43	112	19	1	18	0
Familiar	Feedback	73	53.37231435	3	1	9	14	23	124	19	1	7	0
Familiar	Feedback	74	7.327160494	0	0	27	17	44	68	19	1	20	0
Familiar	Feedback	75	-11.52933833	0	0	12	19	31	124	18	1	48	0
Familiar	Feedback	76	6.369473684	1	0	9	13	22	88	20	0	60	0
Familiar	Feedback	77	51.05566301	1	0	13	18	31	122	21	0	36	0
Familiar	Feedback	78	9.56147337	2	1	4	6	10	119	31	1	168	0
Familiar	Feedback	79	-15.30583912	2	1	12	14	26	91	19	1	12	0
Familiar	Feedback	80	-5.225574713	3	1	12	10	22	82	20	1	6	0
Familiar	Feedback	81	-9.315789474	3	1	8	10	18	83	21	1	5	0
Familiar	Feedback	82	72.62559102	0	0	7	11	18	108	24	1	84	0
Familiar	Feedback	83	-80.52525253	0	0	11	3	14	83	42	1	324	1
Familiar	Feedback	84	29.39368557	1	0	24	15	39	69	24	1	48	0
Familiar	Feedback	85	5.75	1	0	15	4	19	119	19	1	6	0
Familiar	Feedback	86	-45.69473684	2	1	16	11	27	118	19	1	13	0
Familiar	Feedback	87	88.66072106	2	1	12	15	27	89	18	0	16	0
Familiar	Feedback	88	-2.064158807	3	1	26	14	40	96	21	1	60	0
Familiar	Feedback	89	16.30496454	3	1	17	18	35	102	18	0	4	0
Familiar	Feedback	90	20.84451181	0	0	26	15	41	79	25	1	4	0
Familiar	Feedback	91	-4.262640449	0	0	15	11	26	114	19	0	22	1
Familiar	Feedback	92	17.57741228	1	0	25	25	50	67	20	1	60	0
Familiar	Feedback	93	0.76839539	1	0	10	5	15	82	21	0	36	0
Familiar	Feedback	94	0.212352309	2	1	28	11	39	86	24	1	84	0
Familiar	Feedback	95	-4.82881446	2	1	18	18	36	114	18	1	8	1
Familiar	Feedback	96	18.6660247	3	1	17	16	33	101	31	1	144	0
Familiar	Feedback	97	-26.16322339	3	1	18	19	37	99	22	1	0	0
Familiar	Feedback	98	-6.612990196	0	0	12	10	22	84	22	0	15	0
Familiar	Feedback	99	24.45366379	0	0	24	19	23	100	18	1	19	0
Familiar	Feedback	100	-20.8751315	1	0	25	21	46	107	20	1	36	0
Familiar	Feedback	101	0.419113987	1	0	23	19	42	104	18	1	12	0
Familiar	Feedback	102	16.77107813	2	1	11	9	20	86	18	1	20	0
Familiar	Feedback	103	-28.40626461	2	1	17	18	35	114	20	0	58	0
Familiar	Feedback	104	23.6415378	3	1	13	13	26	104	20	1	0	0
Familiar	Feedback	105	-27.11827957	3	1	16	15	31	100	21	1	48	0
Familiar	Feedback	106	-1.224025974	0	0	6	2	8	88	22	1	36	0
Familiar	NoFeedback	1	-32.35321469	0	0	18	10	28	131	23	0	84	0
Familiar	NoFeedback	2	17.50687285	0	0	12	10	22	111	19	0	16	0
Familiar	NoFeedback	3	4.324932796	1	0	10	10	20	83	19	1	1	0
Familiar	NoFeedback	4	17.40594966	1	0	18	13	31	105	18	0	18	0
Familiar	NoFeedback	5	-0.450244167	2	1	22	17	39	77	20	0	27	1
Familiar	NoFeedback	6	-0.246143058	2	1	8	18	26	105	18	1	6	0
Familiar	NoFeedback	7	4.491621659	1	1	19	16	35	101	18	1	12	0
Familiar	NoFeedback	8	2.536842105	3	1	13	12	27	101	20	1	36	0
Familiar	NoFeedback	9	-8.780969031	0	0	14	6	20	94	22	1	0	0
Familiar	NoFeedback	10	-2.454402927	0	0	23	13	36	106	18	1	0	0
Familiar	NoFeedback	11	16.07976126	3	0	20	17	37	112	18	0	0	0
Familiar	NoFeedback	12	7.199617347	1	0	16	15	31	101	18	1	18	0
Familiar	NoFeedback	13	-10.7104299	2	1	12	8	20	115	23	1	72	0
Familiar	NoFeedback	14	-10.269828	2	1	14	13	27	104	18	1	3	0
Familiar	NoFeedback	15	9.740816327	3	1	13	12	25	109	20	1	0	0
Familiar	NoFeedback	16	6.645833333	3	1	15	4	19	77	19	0	0	0
Familiar	NoFeedback	18	5.484123711	0	0	12	9	21	89	18	0	15	0
Familiar	NoFeedback	19	12.08634055	1	0	18	15	33	101	18	1	7	0
Familiar	NoFeedback	20	-5.926834564	1	0	20	11	31	108	19	0	30	0
Familiar	NoFeedback	21	-3.680731532	2	1	14	9	23	81	18	1	18	0
Familiar	NoFeedback	22	-13.72134387	2	1	15	13	28	99	18	1	8	0
Familiar	NoFeedback	23	-11.57558329	3	1	16	12	28	102	18	1	27	0
Familiar	NoFeedback	24	14.23508772	3	1	15	20	35	116	23	0	81	0
Familiar	NoFeedback	25	-6.506410256	0	0	15	11	26	113	18	1	16	0
Familiar	NoFeedback	26	1.831419869	0	0	12	18	30	112	18	0	20	0
Familiar	NoFeedback	27	-20.73444976	1	0	10	8	18	101	18	1	7	0
Familiar	NoFeedback	28	-16.70708203	1	0	9	10	19	90	18	0	8	0
Familiar	NoFeedback	29	27.74361559	2	1	6	5	11	98	18	1	12	0
Familiar	NoFeedback	30	0.617831607	2	1	13	13	26	113	20	1	36	0
Familiar	NoFeedback	31	3.427116212	3	1	16	7	23	96	18	1	12	0
Familiar	NoFeedback	32	6.589646465	3	1	15	10	25	98	18	0	16	0
Familiar	NoFeedback	33	1.405747126	0	0	14	13	27	95	18	1	0	0
Familiar	NoFeedback	34	10.73831094	0	0	13	13	26	103	18	1	24	0
Familiar	NoFeedback	35	9.986234818	1	0	26	23	49	95	18	1	4	0
Familiar	NoFeedback	36	-12.94246032	1	0	18	15	33	101	19	1	36	0
Familiar	NoFeedback	38	2.097110215	2	1	16	14	30	108	19	1	0	0
Familiar	NoFeedback	39	12.39719044	3	1	25	15	40	112	18	1	12	0
Familiar	NoFeedback	40	11.489178	3	1	8	12	20	86	20	0	36	0
Familiar	NoFeedback	41	-11.56521739	0	0	14	11	25	94	18	0	2	0
Familiar	NoFeedback	42	-8.836284177	0	0	13	1	14	84	20	0	48	0
Familiar	NoFeedback	43	-4.916666667	1	0	18	7	25	119	21	1	60	0
Familiar	NoFeedback	44	-0.029376258	1	0	21	12	33	75	18	0	24	1
Familiar	NoFeedback	45	-24.37772215	2	1	20	21	41	84	18	1	7	0
Familiar	NoFeedback	46	-8.084519351	2	1	21	11	32	96	19	1	0	0
Familiar	NoFeedback	47	3.275142579	3	1	9	8	17	93	18	1	26	0
Familiar	NoFeedback	48	6.359936575	3	1	13	12	25	89	20	1	13	0
Familiar	NoFeedback	49	-9.631751227	0	0	5	0	5	78	20	1	24	0
Familiar	NoFeedback	50	7.786516854	0	0	18	17	35	108	18	1	6	0
Familiar	NoFeedback	51	12.30803571	1	0	11	8	19	98	18	1	0	0
Familiar	NoFeedback	52	3.00921659	1	0	18	13	31	87	18	1	0	0
Familiar	NoFeedback	53	10.52610222	2	1	26	23	49	95	25	1	120	0
Familiar	NoFeedback	54	3.54529228	2	1	12	16	28	114	18	1	6	0
Familiar	NoFeedback	55	-0.039693434	3	1	18	15	33	84	19	1	10	0
Familiar	NoFeedback	56	-27.61006894	2	1	13	16	29	107	19	1	36	0
Familiar	NoFeedback	57	17.61609195	3	1	22	20	42	101	19	1	20	0
Familiar	NoFeedback	58	6.439419979	0	0	16	16	32	89	25	1	72	0
Familiar	NoFeedback	59	6.826427903	0	0	22	16	38	131	20	1	0	0
Familiar	NoFeedback	60	2.715470494	1	0	23	19	42	110	19	1	32	0
Familiar	NoFeedback	61	36.87637681	1	0	20	23	43	104	23	1	9	0
Familiar	NoFeedback	62	-8.819497659	3	1	14	0	14	99	45	1	300	1
Familiar	NoFeedback	63	-14.74375	2	1	15	12	27	93	18	1	3	0
Familiar	NoFeedback	64	-0.706102408	3	1	17	12	29	95	21	1	52	0
Familiar	NoFeedback	65	19.20150188	3	1	17	19	36	97	21	0	70	0
Familiar	NoFeedback	66	-12.78176432	0	0	20	9	29	96	18	1	3	0
Familiar	NoFeedback	67	-20.24752788	0	0	13	16	29	108	18	0	0	0
Familiar	NoFeedback	68	-8.310526316	1	0	23	16	39	121	18	1	6	0
Familiar	NoFeedback	69	0.171717172	1	0	19	20	39	80	18	0	4	0
Familiar	NoFeedback	70	10.10605546	2	1	16	13	29	99	18	1	12	0
Familiar	NoFeedback	71	-0.821052632	2	1	9	10	19	96	23	1	84	0
Familiar	NoFeedback	72	-16.59846547	3	1	23	20	43	112	19	1	18	0
Familiar	NoFeedback	73	20.47821166	3	1	9	14	23	124	19	1	7	0
Familiar	NoFeedback	74	9.28218586	0	0	27	17	44	68	19	1	20	0
Familiar	NoFeedback	75	8.023158803	0	0	12	19	31	124	18	1	48	0
Familiar	NoFeedback	76	14.89690722	1	0	9	13	22	88	20	0	60	0
Familiar	NoFeedback	77	-3.215682062	1	0	13	18	31	122	21	0	36	0
Familiar	NoFeedback	78	11.02693748	2	1	4	6	10	119	31	1	168	0
Familiar	NoFeedback	79	-8.315151515	2	1	12	14	26	91	19	1	12	0
Familiar	NoFeedback	80	6.71948857	3	1	12	10	22	82	20	1	6	0
Familiar	NoFeedback	81	-13.89525692	3	1	8	10	18	83	21	1	5	0
Familiar	NoFeedback	82	9.352858241	0	0	7	11	18	108	24	1	84	0
Familiar	NoFeedback	83	-4.111002921	0	0	11	3	14	83	42	1	324	1
Familiar	NoFeedback	84	5.006799737	1	0	24	15	39	69	24	1	48	0
Familiar	NoFeedback	85	12.41052632	1	0	15	4	19	119	19	1	6	0
Familiar	NoFeedback	86	-11.67991583	2	1	16	11	27	118	19	1	13	0
Familiar	NoFeedback	87	-22.0187652	2	1	12	15	27	89	18	0	16	0
Familiar	NoFeedback	88	-0.169705295	3	1	26	14	40	96	21	1	60	0
Familiar	NoFeedback	89	14.4496124	3	1	17	18	35	102	18	0	4	0
Familiar	NoFeedback	90	17.13636364	0	0	26	15	41	79	25	1	4	0
Familiar	NoFeedback	91	-3.415371743	0	0	15	11	26	114	19	0	22	1
Familiar	NoFeedback	92	-3.977028348	1	0	25	25	50	67	20	1	60	0
Familiar	NoFeedback	93	-6.527238719	1	0	10	5	15	82	21	0	36	0
Familiar	NoFeedback	94	-8.901098901	2	1	28	11	39	86	24	1	84	0
Familiar	NoFeedback	95	5.403887457	2	1	18	18	36	114	18	1	8	1
Familiar	NoFeedback	96	2.262244898	3	1	17	16	33	101	31	1	144	0
Familiar	NoFeedback	97	18.63929314	3	1	18	19	37	99	22	1	0	0
Familiar	NoFeedback	98	-2.725609756	0	0	12	10	22	84	22	0	15	0
Familiar	NoFeedback	99	-4.925265957	0	0	24	19	23	100	18	1	19	0
Familiar	NoFeedback	100	22.29347826	1	0	25	21	46	107	20	1	36	0
Familiar	NoFeedback	101	13.47532468	1	0	23	19	42	104	18	1	12	0
Familiar	NoFeedback	102	6.458639976	2	1	11	9	20	86	18	1	20	0
Familiar	NoFeedback	103	-7.868339337	2	1	17	18	35	114	20	0	58	0
Familiar	NoFeedback	104	5.160548758	3	1	13	13	26	104	20	1	0	0
Familiar	NoFeedback	105	-3.075268817	3	1	16	15	31	100	21	1	48	0
Familiar	NoFeedback	106	-30.70872093	0	0	6	2	8	88	22	1	36	0
Novel	NoFeedback	1	-16.69942106	0	0	18	10	28	131	23	0	84	0
Novel	NoFeedback	2	-2.542631579	0	0	12	10	22	111	19	0	16	0
Novel	NoFeedback	3	1.419118516	1	0	10	10	20	83	19	1	1	0
Novel	NoFeedback	4	-21.29718108	1	0	18	13	31	105	18	0	18	0
Novel	NoFeedback	5	2.17057159	2	1	22	17	39	77	20	0	27	1
Novel	NoFeedback	6	-20.27558294	2	1	8	18	26	105	18	1	6	0
Novel	NoFeedback	7	1.276595745	1	1	19	16	35	101	18	1	12	0
Novel	NoFeedback	8	-5.967532468	3	1	13	12	27	101	20	1	36	0
Novel	NoFeedback	9	-27.53122836	0	0	14	6	20	94	22	1	0	0
Novel	NoFeedback	10	7.432387707	0	0	23	13	36	106	18	1	0	0
Novel	NoFeedback	11	-1.374603175	3	0	20	17	37	112	18	0	0	0
Novel	NoFeedback	12	13.42745098	1	0	16	15	31	101	18	1	18	0
Novel	NoFeedback	13	-11.37222222	2	1	12	8	20	115	23	1	72	0
Novel	NoFeedback	14	7.199036435	2	1	14	13	27	104	18	1	3	0
Novel	NoFeedback	15	-9.607602339	3	1	13	12	25	109	20	1	0	0
Novel	NoFeedback	16	9.131313131	3	1	15	4	19	77	19	0	0	0
Novel	NoFeedback	18	-1.092083333	0	0	12	9	21	89	18	0	15	0
Novel	NoFeedback	19	-1.15308255	1	0	18	15	33	101	18	1	7	0
Novel	NoFeedback	20	-2.776595745	1	0	20	11	31	108	19	0	30	0
Novel	NoFeedback	21	-17.26795213	2	1	14	9	23	81	18	1	18	0
Novel	NoFeedback	22	11.49438733	2	1	15	13	28	99	18	1	8	0
Novel	NoFeedback	23	-20.41068799	3	1	16	12	28	102	18	1	27	0
Novel	NoFeedback	24	-15.32764175	3	1	15	20	35	116	23	0	81	0
Novel	NoFeedback	25	11.55917096	0	0	15	11	26	113	18	1	16	0
Novel	NoFeedback	26	-8.495091662	0	0	12	18	30	112	18	0	20	0
Novel	NoFeedback	27	3.423485501	1	0	10	8	18	101	18	1	7	0
Novel	NoFeedback	28	31.52173913	1	0	9	10	19	90	18	0	8	0
Novel	NoFeedback	29	5.913586414	2	1	6	5	11	98	18	1	12	0
Novel	NoFeedback	30	0.163745893	2	1	13	13	26	113	20	1	36	0
Novel	NoFeedback	31	-6.050574713	3	1	16	7	23	96	18	1	12	0
Novel	NoFeedback	32	1.615945494	3	1	15	10	25	98	18	0	16	0
Novel	NoFeedback	33	17.90963855	0	0	14	13	27	95	18	1	0	0
Novel	NoFeedback	34	-24.15822501	0	0	13	13	26	103	18	1	24	0
Novel	NoFeedback	35	16.16062661	1	0	26	23	49	95	18	1	4	0
Novel	NoFeedback	36	-23.95528455	1	0	18	15	33	101	19	1	36	0
Novel	NoFeedback	38	-5.875783699	2	1	16	14	30	108	19	1	0	0
Novel	NoFeedback	39	0.392899833	3	1	25	15	40	112	18	1	12	0
Novel	NoFeedback	40	18.76654182	3	1	8	12	20	86	20	0	36	0
Novel	NoFeedback	41	5.791666667	0	0	14	11	25	94	18	0	2	0
Novel	NoFeedback	42	1.094125809	0	0	13	1	14	84	20	0	48	0
Novel	NoFeedback	43	-0.531914894	1	0	18	7	25	119	21	1	60	0
Novel	NoFeedback	44	-0.311427085	1	0	21	12	33	75	18	0	24	1
Novel	NoFeedback	45	-0.157303371	2	1	20	21	41	84	18	1	7	0
Novel	NoFeedback	46	-5.819659322	2	1	21	11	32	96	19	1	0	0
Novel	NoFeedback	47	0.061748381	3	1	9	8	17	93	18	1	26	0
Novel	NoFeedback	48	5.263608305	3	1	13	12	25	89	20	1	13	0
Novel	NoFeedback	49	0.093868692	0	0	5	0	5	78	20	1	24	0
Novel	NoFeedback	50	-19.50674326	0	0	18	17	35	108	18	1	6	0
Novel	NoFeedback	51	-4.39614899	1	0	11	8	19	98	18	1	0	0
Novel	NoFeedback	52	13.00891515	1	0	18	13	31	87	18	1	0	0
Novel	NoFeedback	53	13.23388524	2	1	26	23	49	95	25	1	120	0
Novel	NoFeedback	54	8.129266012	2	1	12	16	28	114	18	1	6	0
Novel	NoFeedback	55	-12.00455154	3	1	18	15	33	84	19	1	10	0
Novel	NoFeedback	56	15.35814889	2	1	13	16	29	107	19	1	36	0
Novel	NoFeedback	57	-2.20410628	3	1	22	20	42	101	19	1	20	0
Novel	NoFeedback	58	3.039912281	0	0	16	16	32	89	25	1	72	0
Novel	NoFeedback	59	-7.717799131	0	0	22	16	38	131	20	1	0	0
Novel	NoFeedback	60	3.983820922	1	0	23	19	42	110	19	1	32	0
Novel	NoFeedback	61	5.408579216	1	0	20	23	43	104	23	1	9	0
Novel	NoFeedback	62	-10.53409091	3	1	14	0	14	99	45	1	300	1
Novel	NoFeedback	63	20.74090354	2	1	15	12	27	93	18	1	3	0
Novel	NoFeedback	64	8.254908836	3	1	17	12	29	95	21	1	52	0
Novel	NoFeedback	65	1.101870576	3	1	17	19	36	97	21	0	70	0
Novel	NoFeedback	66	2.593307279	0	0	20	9	29	96	18	1	3	0
Novel	NoFeedback	67	2.670281765	0	0	13	16	29	108	18	0	0	0
Novel	NoFeedback	68	12.59107951	1	0	23	16	39	121	18	1	6	0
Novel	NoFeedback	69	-4.955178268	1	0	19	20	39	80	18	0	4	0
Novel	NoFeedback	70	3.735672515	2	1	16	13	29	99	18	1	12	0
Novel	NoFeedback	71	2.030023641	2	1	9	10	19	96	23	1	84	0
Novel	NoFeedback	72	1.514176245	3	1	23	20	43	112	19	1	18	0
Novel	NoFeedback	73	-8.592424242	3	1	9	14	23	124	19	1	7	0
Novel	NoFeedback	74	-20.99326599	0	0	27	17	44	68	19	1	20	0
Novel	NoFeedback	75	0.908088235	0	0	12	19	31	124	18	1	48	0
Novel	NoFeedback	76	8.683125339	1	0	9	13	22	88	20	0	60	0
Novel	NoFeedback	77	22.03816425	1	0	13	18	31	122	21	0	36	0
Novel	NoFeedback	78	-6.785133566	2	1	4	6	10	119	31	1	168	0
Novel	NoFeedback	79	-10.12429854	2	1	12	14	26	91	19	1	12	0
Novel	NoFeedback	80	6.07037037	3	1	12	10	22	82	20	1	6	0
Novel	NoFeedback	81	-0.876190476	3	1	8	10	18	83	21	1	5	0
Novel	NoFeedback	82	6.342465753	0	0	7	11	18	108	24	1	84	0
Novel	NoFeedback	83	-2.734019734	0	0	11	3	14	83	42	1	324	1
Novel	NoFeedback	84	-9.109539474	1	0	24	15	39	69	24	1	48	0
Novel	NoFeedback	85	-9.533559706	1	0	15	4	19	119	19	1	6	0
Novel	NoFeedback	86	-11.04255801	2	1	16	11	27	118	19	1	13	0
Novel	NoFeedback	87	20.85397536	2	1	12	15	27	89	18	0	16	0
Novel	NoFeedback	88	5.289084249	3	1	26	14	40	96	21	1	60	0
Novel	NoFeedback	89	-9.34589372	3	1	17	18	35	102	18	0	4	0
Novel	NoFeedback	90	-13.7248062	0	0	26	15	41	79	25	1	4	0
Novel	NoFeedback	91	-5.240253411	0	0	15	11	26	114	19	0	22	1
Novel	NoFeedback	92	0.456957691	1	0	25	25	50	67	20	1	60	0
Novel	NoFeedback	93	1.333088235	1	0	10	5	15	82	21	0	36	0
Novel	NoFeedback	94	13.59612298	2	1	28	11	39	86	24	1	84	0
Novel	NoFeedback	95	-4.380887681	2	1	18	18	36	114	18	1	8	1
Novel	NoFeedback	96	-5.346938776	3	1	17	16	33	101	31	1	144	0
Novel	NoFeedback	97	-3.322812052	3	1	18	19	37	99	22	1	0	0
Novel	NoFeedback	98	1.611111111	0	0	12	10	22	84	22	0	15	0
Novel	NoFeedback	99	-0.757356875	0	0	24	19	23	100	18	1	19	0
Novel	NoFeedback	100	-21.52733447	1	0	25	21	46	107	20	1	36	0
Novel	NoFeedback	101	-13.31709957	1	0	23	19	42	104	18	1	12	0
Novel	NoFeedback	102	-5.954022989	2	1	11	9	20	86	18	1	20	0
Novel	NoFeedback	103	4.902014652	2	1	17	18	35	114	20	0	58	0
Novel	NoFeedback	104	3.272222222	3	1	13	13	26	104	20	1	0	0
Novel	NoFeedback	105	9.195876289	3	1	16	15	31	100	21	1	48	0
Novel	NoFeedback	106	-7.882626807	0	0	6	2	8	88	22	1	36	0
