# Supplementary material for: Habit Expression and Disruption as a Function of Attention-Deficit/Hyperactivity Disorder Symptomology
Source: Front Psychol. 2019 Sep 3;10:1997. doi: 10.3389/fpsyg.2019.01997 (PMC6733985; doi:10.3389/fpsyg.2019.01997)
Supplement: Supplementary file 1 [file Data_Sheet_1.ZIP › Exp8_NoGo_Full.csv]

StimulusType	FeedbackCond	Subject	Acc_Diff	Cong_Order	Stim_Order	ASRS_A	ASRS_B	ASRS_Total	COHS	Age	Gender	Drive	Diagnosis
Familiar	Feedback	1	-0.45	0	0	18	10	28	131	23	0	84	0
Familiar	Feedback	2	-0.05	0	0	12	10	22	111	19	0	16	0
Familiar	Feedback	3	0.15	1	0	10	10	20	83	19	1	1	0
Familiar	Feedback	4	-0.3	1	0	18	13	31	105	18	0	18	0
Familiar	Feedback	5	-0.2	2	1	22	17	39	77	20	0	27	1
Familiar	Feedback	6	-0.1	2	1	8	18	26	105	18	1	6	0
Familiar	Feedback	7	0	1	1	19	16	35	101	18	1	12	0
Familiar	Feedback	8	0.1	3	1	13	12	27	101	20	1	36	0
Familiar	Feedback	9	-0.1	0	0	14	6	20	94	22	1	0	0
Familiar	Feedback	10	-0.15	0	0	23	13	36	106	18	1	0	0
Familiar	Feedback	11	-0.1	3	0	20	17	37	112	18	0	0	0
Familiar	Feedback	12	0.1	1	0	16	15	31	101	18	1	18	0
Familiar	Feedback	13	0.05	2	1	12	8	20	115	23	1	72	0
Familiar	Feedback	14	-0.05	2	1	14	13	27	104	18	1	3	0
Familiar	Feedback	15	0.35	3	1	13	12	25	109	20	1	0	0
Familiar	Feedback	16	0.1	3	1	15	4	19	77	19	0	0	0
Familiar	Feedback	18	0	0	0	12	9	21	89	18	0	15	0
Familiar	Feedback	19	0.35	1	0	18	15	33	101	18	1	7	0
Familiar	Feedback	20	0.1	1	0	20	11	31	108	19	0	30	0
Familiar	Feedback	21	-0.05	2	1	14	9	23	81	18	1	18	0
Familiar	Feedback	22	0	2	1	15	13	28	99	18	1	8	0
Familiar	Feedback	23	0.05	3	1	16	12	28	102	18	1	27	0
Familiar	Feedback	24	0.05	3	1	15	20	35	116	23	0	81	0
Familiar	Feedback	25	0.1	0	0	15	11	26	113	18	1	16	0
Familiar	Feedback	26	-0.4	0	0	12	18	30	112	18	0	20	0
Familiar	Feedback	27	-0.2	1	0	10	8	18	101	18	1	7	0
Familiar	Feedback	28	0	1	0	9	10	19	90	18	0	8	0
Familiar	Feedback	29	0.05	2	1	6	5	11	98	18	1	12	0
Familiar	Feedback	30	-0.35	2	1	13	13	26	113	20	1	36	0
Familiar	Feedback	31	0.15	3	1	16	7	23	96	18	1	12	0
Familiar	Feedback	32	-0.25	3	1	15	10	25	98	18	0	16	0
Familiar	Feedback	33	0.1	0	0	14	13	27	95	18	1	0	0
Familiar	Feedback	34	-0.15	0	0	13	13	26	103	18	1	24	0
Familiar	Feedback	35	0.2	1	0	26	23	49	95	18	1	4	0
Familiar	Feedback	36	-0.15	1	0	18	15	33	101	19	1	36	0
Familiar	Feedback	38	-0.1	2	1	16	14	30	108	19	1	0	0
Familiar	Feedback	39	-0.1	3	1	25	15	40	112	18	1	12	0
Familiar	Feedback	40	0.15	3	1	8	12	20	86	20	0	36	0
Familiar	Feedback	41	-0.05	0	0	14	11	25	94	18	0	2	0
Familiar	Feedback	42	0.05	0	0	13	1	14	84	20	0	48	0
Familiar	Feedback	43	0	1	0	18	7	25	119	21	1	60	0
Familiar	Feedback	44	-0.35	1	0	21	12	33	75	18	0	24	1
Familiar	Feedback	45	0.2	2	1	20	21	41	84	18	1	7	0
Familiar	Feedback	46	0.1	2	1	21	11	32	96	19	1	0	0
Familiar	Feedback	47	0.05	3	1	9	8	17	93	18	1	26	0
Familiar	Feedback	48	0.05	3	1	13	12	25	89	20	1	13	0
Familiar	Feedback	49	0.1	0	0	5	0	5	78	20	1	24	0
Familiar	Feedback	50	-0.1	0	0	18	17	35	108	18	1	6	0
Familiar	Feedback	51	0.05	1	0	11	8	19	98	18	1	0	0
Familiar	Feedback	52	-0.25	1	0	18	13	31	87	18	1	0	0
Familiar	Feedback	53	-0.1	2	1	26	23	49	95	25	1	120	0
Familiar	Feedback	54	-0.2	2	1	12	16	28	114	18	1	6	0
Familiar	Feedback	55	0.15	3	1	18	15	33	84	19	1	10	0
Familiar	Feedback	56	-0.15	2	1	13	16	29	107	19	1	36	0
Familiar	Feedback	57	0.05	3	1	22	20	42	101	19	1	20	0
Familiar	Feedback	58	0.1	0	0	16	16	32	89	25	1	72	0
Familiar	Feedback	59	0.35	0	0	22	16	38	131	20	1	0	0
Familiar	Feedback	60	0.1	1	0	23	19	42	110	19	1	32	0
Familiar	Feedback	61	0.1	1	0	20	23	43	104	23	1	9	0
Familiar	Feedback	62	0	3	1	14	0	14	99	45	1	300	1
Familiar	Feedback	63	0.1	2	1	15	12	27	93	18	1	3	0
Familiar	Feedback	64	0	3	1	17	12	29	95	21	1	52	0
Familiar	Feedback	65	-0.05	3	1	17	19	36	97	21	0	70	0
Familiar	Feedback	66	-0.05	0	0	20	9	29	96	18	1	3	0
Familiar	Feedback	67	0	0	0	13	16	29	108	18	0	0	0
Familiar	Feedback	68	-0.05	1	0	23	16	39	121	18	1	6	0
Familiar	Feedback	69	0.1	1	0	19	20	39	80	18	0	4	0
Familiar	Feedback	70	0	2	1	16	13	29	99	18	1	12	0
Familiar	Feedback	71	-0.15	2	1	9	10	19	96	23	1	84	0
Familiar	Feedback	72	-0.05	3	1	23	20	43	112	19	1	18	0
Familiar	Feedback	73	0.35	3	1	9	14	23	124	19	1	7	0
Familiar	Feedback	74	-0.25	0	0	27	17	44	68	19	1	20	0
Familiar	Feedback	75	0.05	0	0	12	19	31	124	18	1	48	0
Familiar	Feedback	76	0	1	0	9	13	22	88	20	0	60	0
Familiar	Feedback	77	0.05	1	0	13	18	31	122	21	0	36	0
Familiar	Feedback	78	-0.05	2	1	4	6	10	119	31	1	168	0
Familiar	Feedback	79	0.1	2	1	12	14	26	91	19	1	12	0
Familiar	Feedback	80	-0.05	3	1	12	10	22	82	20	1	6	0
Familiar	Feedback	81	0.25	3	1	8	10	18	83	21	1	5	0
Familiar	Feedback	82	0.1	0	0	7	11	18	108	24	1	84	0
Familiar	Feedback	83	0	0	0	11	3	14	83	42	1	324	1
Familiar	Feedback	84	0.2	1	0	24	15	39	69	24	1	48	0
Familiar	Feedback	85	0.1	1	0	15	4	19	119	19	1	6	0
Familiar	Feedback	86	0.15	2	1	16	11	27	118	19	1	13	0
Familiar	Feedback	87	0.25	2	1	12	15	27	89	18	0	16	0
Familiar	Feedback	88	-0.15	3	1	26	14	40	96	21	1	60	0
Familiar	Feedback	89	0.3	3	1	17	18	35	102	18	0	4	0
Familiar	Feedback	90	0.15	0	0	26	15	41	79	25	1	4	0
Familiar	Feedback	91	-0.05	0	0	15	11	26	114	19	0	22	1
Familiar	Feedback	92	-0.1	1	0	25	25	50	67	20	1	60	0
Familiar	Feedback	93	0	1	0	10	5	15	82	21	0	36	0
Familiar	Feedback	94	0	2	1	28	11	39	86	24	1	84	0
Familiar	Feedback	95	0.3	2	1	18	18	36	114	18	1	8	1
Familiar	Feedback	96	-0.1	3	1	17	16	33	101	31	1	144	0
Familiar	Feedback	97	0.25	3	1	18	19	37	99	22	1	0	0
Familiar	Feedback	98	0.05	0	0	12	10	22	84	22	0	15	0
Familiar	Feedback	99	0.25	0	0	24	19	23	100	18	1	19	0
Familiar	Feedback	100	0	1	0	25	21	46	107	20	1	36	0
Familiar	Feedback	101	-0.3	1	0	23	19	42	104	18	1	12	0
Familiar	Feedback	102	-0.05	2	1	11	9	20	86	18	1	20	0
Familiar	Feedback	103	0	2	1	17	18	35	114	20	0	58	0
Familiar	Feedback	104	0.1	3	1	13	13	26	104	20	1	0	0
Familiar	Feedback	105	0.2	3	1	16	15	31	100	21	1	48	0
Familiar	Feedback	106	-0.25	0	0	6	2	8	88	22	1	36	0
Familiar	NoFeedback	1	-0.45	0	0	18	10	28	131	23	0	84	0
Familiar	NoFeedback	2	-0.1	0	0	12	10	22	111	19	0	16	0
Familiar	NoFeedback	3	-0.1	1	0	10	10	20	83	19	1	1	0
Familiar	NoFeedback	4	0.05	1	0	18	13	31	105	18	0	18	0
Familiar	NoFeedback	5	-0.1	2	1	22	17	39	77	20	0	27	1
Familiar	NoFeedback	6	-0.15	2	1	8	18	26	105	18	1	6	0
Familiar	NoFeedback	7	0.1	1	1	19	16	35	101	18	1	12	0
Familiar	NoFeedback	8	0	3	1	13	12	27	101	20	1	36	0
Familiar	NoFeedback	9	-0.2	0	0	14	6	20	94	22	1	0	0
Familiar	NoFeedback	10	0	0	0	23	13	36	106	18	1	0	0
Familiar	NoFeedback	11	0	3	0	20	17	37	112	18	0	0	0
Familiar	NoFeedback	12	-0.2	1	0	16	15	31	101	18	1	18	0
Familiar	NoFeedback	13	-0.3	2	1	12	8	20	115	23	1	72	0
Familiar	NoFeedback	14	-0.25	2	1	14	13	27	104	18	1	3	0
Familiar	NoFeedback	15	-0.2	3	1	13	12	25	109	20	1	0	0
Familiar	NoFeedback	16	0.1	3	1	15	4	19	77	19	0	0	0
Familiar	NoFeedback	18	0.05	0	0	12	9	21	89	18	0	15	0
Familiar	NoFeedback	19	-0.15	1	0	18	15	33	101	18	1	7	0
Familiar	NoFeedback	20	0	1	0	20	11	31	108	19	0	30	0
Familiar	NoFeedback	21	-0.35	2	1	14	9	23	81	18	1	18	0
Familiar	NoFeedback	22	-0.1	2	1	15	13	28	99	18	1	8	0
Familiar	NoFeedback	23	-0.05	3	1	16	12	28	102	18	1	27	0
Familiar	NoFeedback	24	-0.35	3	1	15	20	35	116	23	0	81	0
Familiar	NoFeedback	25	-0.05	0	0	15	11	26	113	18	1	16	0
Familiar	NoFeedback	26	-0.2	0	0	12	18	30	112	18	0	20	0
Familiar	NoFeedback	27	-0.25	1	0	10	8	18	101	18	1	7	0
Familiar	NoFeedback	28	0.05	1	0	9	10	19	90	18	0	8	0
Familiar	NoFeedback	29	0.1	2	1	6	5	11	98	18	1	12	0
Familiar	NoFeedback	30	-0.45	2	1	13	13	26	113	20	1	36	0
Familiar	NoFeedback	31	0.05	3	1	16	7	23	96	18	1	12	0
Familiar	NoFeedback	32	-0.05	3	1	15	10	25	98	18	0	16	0
Familiar	NoFeedback	33	0.25	0	0	14	13	27	95	18	1	0	0
Familiar	NoFeedback	34	0	0	0	13	13	26	103	18	1	24	0
Familiar	NoFeedback	35	-0.25	1	0	26	23	49	95	18	1	4	0
Familiar	NoFeedback	36	-0.25	1	0	18	15	33	101	19	1	36	0
Familiar	NoFeedback	38	-0.05	2	1	16	14	30	108	19	1	0	0
Familiar	NoFeedback	39	0.05	3	1	25	15	40	112	18	1	12	0
Familiar	NoFeedback	40	-0.05	3	1	8	12	20	86	20	0	36	0
Familiar	NoFeedback	41	-0.2	0	0	14	11	25	94	18	0	2	0
Familiar	NoFeedback	42	-0.35	0	0	13	1	14	84	20	0	48	0
Familiar	NoFeedback	43	0.1	1	0	18	7	25	119	21	1	60	0
Familiar	NoFeedback	44	-0.15	1	0	21	12	33	75	18	0	24	1
Familiar	NoFeedback	45	-0.45	2	1	20	21	41	84	18	1	7	0
Familiar	NoFeedback	46	-0.2	2	1	21	11	32	96	19	1	0	0
Familiar	NoFeedback	47	-0.15	3	1	9	8	17	93	18	1	26	0
Familiar	NoFeedback	48	0.1	3	1	13	12	25	89	20	1	13	0
Familiar	NoFeedback	49	-0.15	0	0	5	0	5	78	20	1	24	0
Familiar	NoFeedback	50	0.2	0	0	18	17	35	108	18	1	6	0
Familiar	NoFeedback	51	-0.05	1	0	11	8	19	98	18	1	0	0
Familiar	NoFeedback	52	-0.25	1	0	18	13	31	87	18	1	0	0
Familiar	NoFeedback	53	0.05	2	1	26	23	49	95	25	1	120	0
Familiar	NoFeedback	54	0	2	1	12	16	28	114	18	1	6	0
Familiar	NoFeedback	55	-0.15	3	1	18	15	33	84	19	1	10	0
Familiar	NoFeedback	56	-0.3	2	1	13	16	29	107	19	1	36	0
Familiar	NoFeedback	57	-0.1	3	1	22	20	42	101	19	1	20	0
Familiar	NoFeedback	58	0.1	0	0	16	16	32	89	25	1	72	0
Familiar	NoFeedback	59	-0.2	0	0	22	16	38	131	20	1	0	0
Familiar	NoFeedback	60	0.1	1	0	23	19	42	110	19	1	32	0
Familiar	NoFeedback	61	-0.05	1	0	20	23	43	104	23	1	9	0
Familiar	NoFeedback	62	-0.05	3	1	14	0	14	99	45	1	300	1
Familiar	NoFeedback	63	-0.5	2	1	15	12	27	93	18	1	3	0
Familiar	NoFeedback	64	-0.35	3	1	17	12	29	95	21	1	52	0
Familiar	NoFeedback	65	0.4	3	1	17	19	36	97	21	0	70	0
Familiar	NoFeedback	66	-0.05	0	0	20	9	29	96	18	1	3	0
Familiar	NoFeedback	67	-0.1	0	0	13	16	29	108	18	0	0	0
Familiar	NoFeedback	68	-0.15	1	0	23	16	39	121	18	1	6	0
Familiar	NoFeedback	69	0	1	0	19	20	39	80	18	0	4	0
Familiar	NoFeedback	70	-0.1	2	1	16	13	29	99	18	1	12	0
Familiar	NoFeedback	71	0.1	2	1	9	10	19	96	23	1	84	0
Familiar	NoFeedback	72	-0.2	3	1	23	20	43	112	19	1	18	0
Familiar	NoFeedback	73	-0.05	3	1	9	14	23	124	19	1	7	0
Familiar	NoFeedback	74	0.2	0	0	27	17	44	68	19	1	20	0
Familiar	NoFeedback	75	-0.2	0	0	12	19	31	124	18	1	48	0
Familiar	NoFeedback	76	0.3	1	0	9	13	22	88	20	0	60	0
Familiar	NoFeedback	77	0.1	1	0	13	18	31	122	21	0	36	0
Familiar	NoFeedback	78	-0.15	2	1	4	6	10	119	31	1	168	0
Familiar	NoFeedback	79	0.05	2	1	12	14	26	91	19	1	12	0
Familiar	NoFeedback	80	-0.15	3	1	12	10	22	82	20	1	6	0
Familiar	NoFeedback	81	-0.05	3	1	8	10	18	83	21	1	5	0
Familiar	NoFeedback	82	0	0	0	7	11	18	108	24	1	84	0
Familiar	NoFeedback	83	0.05	0	0	11	3	14	83	42	1	324	1
Familiar	NoFeedback	84	0	1	0	24	15	39	69	24	1	48	0
Familiar	NoFeedback	85	-0.1	1	0	15	4	19	119	19	1	6	0
Familiar	NoFeedback	86	-0.45	2	1	16	11	27	118	19	1	13	0
Familiar	NoFeedback	87	-0.25	2	1	12	15	27	89	18	0	16	0
Familiar	NoFeedback	88	0.05	3	1	26	14	40	96	21	1	60	0
Familiar	NoFeedback	89	0.1	3	1	17	18	35	102	18	0	4	0
Familiar	NoFeedback	90	-0.2	0	0	26	15	41	79	25	1	4	0
Familiar	NoFeedback	91	-0.2	0	0	15	11	26	114	19	0	22	1
Familiar	NoFeedback	92	-0.05	1	0	25	25	50	67	20	1	60	0
Familiar	NoFeedback	93	-0.1	1	0	10	5	15	82	21	0	36	0
Familiar	NoFeedback	94	0	2	1	28	11	39	86	24	1	84	0
Familiar	NoFeedback	95	-0.2	2	1	18	18	36	114	18	1	8	1
Familiar	NoFeedback	96	0	3	1	17	16	33	101	31	1	144	0
Familiar	NoFeedback	97	0.2	3	1	18	19	37	99	22	1	0	0
Familiar	NoFeedback	98	-0.25	0	0	12	10	22	84	22	0	15	0
Familiar	NoFeedback	99	-0.2	0	0	24	19	23	100	18	1	19	0
Familiar	NoFeedback	100	-0.1	1	0	25	21	46	107	20	1	36	0
Familiar	NoFeedback	101	0	1	0	23	19	42	104	18	1	12	0
Familiar	NoFeedback	102	-0.1	2	1	11	9	20	86	18	1	20	0
Familiar	NoFeedback	103	-0.15	2	1	17	18	35	114	20	0	58	0
Familiar	NoFeedback	104	-0.15	3	1	13	13	26	104	20	1	0	0
Familiar	NoFeedback	105	0.05	3	1	16	15	31	100	21	1	48	0
Familiar	NoFeedback	106	-0.1	0	0	6	2	8	88	22	1	36	0
Novel	NoFeedback	1	-0.15	0	0	18	10	28	131	23	0	84	0
Novel	NoFeedback	2	0	0	0	12	10	22	111	19	0	16	0
Novel	NoFeedback	3	0.05	1	0	10	10	20	83	19	1	1	0
Novel	NoFeedback	4	-0.15	1	0	18	13	31	105	18	0	18	0
Novel	NoFeedback	5	0.15	2	1	22	17	39	77	20	0	27	1
Novel	NoFeedback	6	-0.15	2	1	8	18	26	105	18	1	6	0
Novel	NoFeedback	7	-0.1	1	1	19	16	35	101	18	1	12	0
Novel	NoFeedback	8	-0.05	3	1	13	12	27	101	20	1	36	0
Novel	NoFeedback	9	-0.1	0	0	14	6	20	94	22	1	0	0
Novel	NoFeedback	10	0.15	0	0	23	13	36	106	18	1	0	0
Novel	NoFeedback	11	0.05	3	0	20	17	37	112	18	0	0	0
Novel	NoFeedback	12	0.25	1	0	16	15	31	101	18	1	18	0
Novel	NoFeedback	13	-0.15	2	1	12	8	20	115	23	1	72	0
Novel	NoFeedback	14	-0.05	2	1	14	13	27	104	18	1	3	0
Novel	NoFeedback	15	0	3	1	13	12	25	109	20	1	0	0
Novel	NoFeedback	16	-0.05	3	1	15	4	19	77	19	0	0	0
Novel	NoFeedback	18	0.2	0	0	12	9	21	89	18	0	15	0
Novel	NoFeedback	19	0.05	1	0	18	15	33	101	18	1	7	0
Novel	NoFeedback	20	0.1	1	0	20	11	31	108	19	0	30	0
Novel	NoFeedback	21	-0.05	2	1	14	9	23	81	18	1	18	0
Novel	NoFeedback	22	0.05	2	1	15	13	28	99	18	1	8	0
Novel	NoFeedback	23	-0.05	3	1	16	12	28	102	18	1	27	0
Novel	NoFeedback	24	-0.05	3	1	15	20	35	116	23	0	81	0
Novel	NoFeedback	25	-0.2	0	0	15	11	26	113	18	1	16	0
Novel	NoFeedback	26	0.15	0	0	12	18	30	112	18	0	20	0
Novel	NoFeedback	27	-0.05	1	0	10	8	18	101	18	1	7	0
Novel	NoFeedback	28	0.3	1	0	9	10	19	90	18	0	8	0
Novel	NoFeedback	29	0.25	2	1	6	5	11	98	18	1	12	0
Novel	NoFeedback	30	0	2	1	13	13	26	113	20	1	36	0
Novel	NoFeedback	31	-0.15	3	1	16	7	23	96	18	1	12	0
Novel	NoFeedback	32	-0.25	3	1	15	10	25	98	18	0	16	0
Novel	NoFeedback	33	0	0	0	14	13	27	95	18	1	0	0
Novel	NoFeedback	34	-0.2	0	0	13	13	26	103	18	1	24	0
Novel	NoFeedback	35	0.1	1	0	26	23	49	95	18	1	4	0
Novel	NoFeedback	36	0.15	1	0	18	15	33	101	19	1	36	0
Novel	NoFeedback	38	-0.05	2	1	16	14	30	108	19	1	0	0
Novel	NoFeedback	39	-0.05	3	1	25	15	40	112	18	1	12	0
Novel	NoFeedback	40	-0.05	3	1	8	12	20	86	20	0	36	0
Novel	NoFeedback	41	0.1	0	0	14	11	25	94	18	0	2	0
Novel	NoFeedback	42	0.15	0	0	13	1	14	84	20	0	48	0
Novel	NoFeedback	43	0.1	1	0	18	7	25	119	21	1	60	0
Novel	NoFeedback	44	0.2	1	0	21	12	33	75	18	0	24	1
Novel	NoFeedback	45	-0.2	2	1	20	21	41	84	18	1	7	0
Novel	NoFeedback	46	0.05	2	1	21	11	32	96	19	1	0	0
Novel	NoFeedback	47	0.1	3	1	9	8	17	93	18	1	26	0
Novel	NoFeedback	48	-0.05	3	1	13	12	25	89	20	1	13	0
Novel	NoFeedback	49	-0.05	0	0	5	0	5	78	20	1	24	0
Novel	NoFeedback	50	-0.15	0	0	18	17	35	108	18	1	6	0
Novel	NoFeedback	51	0.1	1	0	11	8	19	98	18	1	0	0
Novel	NoFeedback	52	-0.1	1	0	18	13	31	87	18	1	0	0
Novel	NoFeedback	53	0.4	2	1	26	23	49	95	25	1	120	0
Novel	NoFeedback	54	0.1	2	1	12	16	28	114	18	1	6	0
Novel	NoFeedback	55	0	3	1	18	15	33	84	19	1	10	0
Novel	NoFeedback	56	0.3	2	1	13	16	29	107	19	1	36	0
Novel	NoFeedback	57	-0.2	3	1	22	20	42	101	19	1	20	0
Novel	NoFeedback	58	-0.05	0	0	16	16	32	89	25	1	72	0
Novel	NoFeedback	59	0.05	0	0	22	16	38	131	20	1	0	0
Novel	NoFeedback	60	0.15	1	0	23	19	42	110	19	1	32	0
Novel	NoFeedback	61	-0.2	1	0	20	23	43	104	23	1	9	0
Novel	NoFeedback	62	0.15	3	1	14	0	14	99	45	1	300	1
Novel	NoFeedback	63	0.15	2	1	15	12	27	93	18	1	3	0
Novel	NoFeedback	64	0.2	3	1	17	12	29	95	21	1	52	0
Novel	NoFeedback	65	-0.1	3	1	17	19	36	97	21	0	70	0
Novel	NoFeedback	66	0.25	0	0	20	9	29	96	18	1	3	0
Novel	NoFeedback	67	0.1	0	0	13	16	29	108	18	0	0	0
Novel	NoFeedback	68	0.25	1	0	23	16	39	121	18	1	6	0
Novel	NoFeedback	69	0.05	1	0	19	20	39	80	18	0	4	0
Novel	NoFeedback	70	-0.05	2	1	16	13	29	99	18	1	12	0
Novel	NoFeedback	71	0.15	2	1	9	10	19	96	23	1	84	0
Novel	NoFeedback	72	-0.5	3	1	23	20	43	112	19	1	18	0
Novel	NoFeedback	73	-0.15	3	1	9	14	23	124	19	1	7	0
Novel	NoFeedback	74	-0.3	0	0	27	17	44	68	19	1	20	0
Novel	NoFeedback	75	0.05	0	0	12	19	31	124	18	1	48	0
Novel	NoFeedback	76	0.15	1	0	9	13	22	88	20	0	60	0
Novel	NoFeedback	77	0.25	1	0	13	18	31	122	21	0	36	0
Novel	NoFeedback	78	-0.1	2	1	4	6	10	119	31	1	168	0
Novel	NoFeedback	79	0.1	2	1	12	14	26	91	19	1	12	0
Novel	NoFeedback	80	0	3	1	12	10	22	82	20	1	6	0
Novel	NoFeedback	81	-0.1	3	1	8	10	18	83	21	1	5	0
Novel	NoFeedback	82	-0.15	0	0	7	11	18	108	24	1	84	0
Novel	NoFeedback	83	-0.05	0	0	11	3	14	83	42	1	324	1
Novel	NoFeedback	84	0	1	0	24	15	39	69	24	1	48	0
Novel	NoFeedback	85	0	1	0	15	4	19	119	19	1	6	0
Novel	NoFeedback	86	0.2	2	1	16	11	27	118	19	1	13	0
Novel	NoFeedback	87	0.1	2	1	12	15	27	89	18	0	16	0
Novel	NoFeedback	88	-0.1	3	1	26	14	40	96	21	1	60	0
Novel	NoFeedback	89	0.25	3	1	17	18	35	102	18	0	4	0
Novel	NoFeedback	90	-0.3	0	0	26	15	41	79	25	1	4	0
Novel	NoFeedback	91	0.25	0	0	15	11	26	114	19	0	22	1
Novel	NoFeedback	92	-0.15	1	0	25	25	50	67	20	1	60	0
Novel	NoFeedback	93	0.15	1	0	10	5	15	82	21	0	36	0
Novel	NoFeedback	94	0.05	2	1	28	11	39	86	24	1	84	0
Novel	NoFeedback	95	0.05	2	1	18	18	36	114	18	1	8	1
Novel	NoFeedback	96	0.05	3	1	17	16	33	101	31	1	144	0
Novel	NoFeedback	97	-0.1	3	1	18	19	37	99	22	1	0	0
Novel	NoFeedback	98	0.05	0	0	12	10	22	84	22	0	15	0
Novel	NoFeedback	99	0.1	0	0	24	19	23	100	18	1	19	0
Novel	NoFeedback	100	-0.05	1	0	25	21	46	107	20	1	36	0
Novel	NoFeedback	101	0.05	1	0	23	19	42	104	18	1	12	0
Novel	NoFeedback	102	0	2	1	11	9	20	86	18	1	20	0
Novel	NoFeedback	103	0.25	2	1	17	18	35	114	20	0	58	0
Novel	NoFeedback	104	0	3	1	13	13	26	104	20	1	0	0
Novel	NoFeedback	105	0	3	1	16	15	31	100	21	1	48	0
Novel	NoFeedback	106	-0.2	0	0	6	2	8	88	22	1	36	0
