# Supplementary material for: Habit Expression and Disruption as a Function of Attention-Deficit/Hyperactivity Disorder Symptomology
Source: Front Psychol. 2019 Sep 3;10:1997. doi: 10.3389/fpsyg.2019.01997 (PMC6733985; doi:10.3389/fpsyg.2019.01997)
Supplement: Supplementary file 1 [file Data_Sheet_1.ZIP › gostatssheet_full.csv]

	StimulusType	Congruency	FeedbackCond	Subject	Accuracy
0	Familiar	Congruent	Feedback	1	0.92
1	Familiar	Congruent	Feedback	2	0.98
2	Familiar	Congruent	Feedback	3	0.99
3	Familiar	Congruent	Feedback	4	0.89
4	Familiar	Congruent	Feedback	5	1
5	Familiar	Congruent	Feedback	6	0.97
6	Familiar	Congruent	Feedback	7	0.95
7	Familiar	Congruent	Feedback	8	0.93
8	Familiar	Congruent	Feedback	9	0.88
9	Familiar	Congruent	Feedback	10	0.98
10	Familiar	Congruent	Feedback	11	0.97
11	Familiar	Congruent	Feedback	12	0.99
12	Familiar	Congruent	Feedback	13	0.95
13	Familiar	Congruent	Feedback	14	0.91
14	Familiar	Congruent	Feedback	15	0.94
15	Familiar	Congruent	Feedback	16	0.98
17	Familiar	Congruent	Feedback	18	1
18	Familiar	Congruent	Feedback	19	0.95
19	Familiar	Congruent	Feedback	20	0.97
20	Familiar	Congruent	Feedback	21	0.96
21	Familiar	Congruent	Feedback	22	0.97
22	Familiar	Congruent	Feedback	23	1
23	Familiar	Congruent	Feedback	24	0.95
24	Familiar	Congruent	Feedback	25	0.97
25	Familiar	Congruent	Feedback	26	0.95
26	Familiar	Congruent	Feedback	27	0.91
27	Familiar	Congruent	Feedback	28	0.93
28	Familiar	Congruent	Feedback	29	0.99
29	Familiar	Congruent	Feedback	30	0.92
30	Familiar	Congruent	Feedback	31	0.9
31	Familiar	Congruent	Feedback	32	0.87
32	Familiar	Congruent	Feedback	33	0.88
33	Familiar	Congruent	Feedback	34	0.99
34	Familiar	Congruent	Feedback	35	0.98
35	Familiar	Congruent	Feedback	36	0.85
36	Familiar	Congruent	Feedback	38	0.95
37	Familiar	Congruent	Feedback	39	0.99
38	Familiar	Congruent	Feedback	40	0.95
39	Familiar	Congruent	Feedback	41	0.79
40	Familiar	Congruent	Feedback	42	0.96
41	Familiar	Congruent	Feedback	43	0.96
42	Familiar	Congruent	Feedback	44	0.91
43	Familiar	Congruent	Feedback	45	0.9
44	Familiar	Congruent	Feedback	46	0.98
45	Familiar	Congruent	Feedback	47	0.88
46	Familiar	Congruent	Feedback	48	0.93
47	Familiar	Congruent	Feedback	49	0.99
48	Familiar	Congruent	Feedback	50	0.9
49	Familiar	Congruent	Feedback	51	0.98
50	Familiar	Congruent	Feedback	52	0.94
51	Familiar	Congruent	Feedback	53	1
52	Familiar	Congruent	Feedback	54	0.96
53	Familiar	Congruent	Feedback	55	0.93
54	Familiar	Congruent	Feedback	56	0.88
55	Familiar	Congruent	Feedback	57	0.93
56	Familiar	Congruent	Feedback	58	0.98
57	Familiar	Congruent	Feedback	59	0.97
58	Familiar	Congruent	Feedback	60	1
59	Familiar	Congruent	Feedback	61	0.96
60	Familiar	Congruent	Feedback	62	0.94
61	Familiar	Congruent	Feedback	63	0.97
62	Familiar	Congruent	Feedback	64	0.95
63	Familiar	Congruent	Feedback	65	0.95
64	Familiar	Congruent	Feedback	66	0.89
65	Familiar	Congruent	Feedback	67	0.97
66	Familiar	Congruent	Feedback	68	0.93
67	Familiar	Congruent	Feedback	69	0.97
68	Familiar	Congruent	Feedback	70	0.99
69	Familiar	Congruent	Feedback	71	0.93
70	Familiar	Congruent	Feedback	72	0.81
71	Familiar	Congruent	Feedback	73	0.95
72	Familiar	Congruent	Feedback	74	0.81
73	Familiar	Congruent	Feedback	75	0.89
74	Familiar	Congruent	Feedback	76	1
75	Familiar	Congruent	Feedback	77	0.99
76	Familiar	Congruent	Feedback	78	0.98
77	Familiar	Congruent	Feedback	79	0.79
78	Familiar	Congruent	Feedback	80	0.87
79	Familiar	Congruent	Feedback	81	0.95
80	Familiar	Congruent	Feedback	82	0.94
81	Familiar	Congruent	Feedback	83	0.69
82	Familiar	Congruent	Feedback	84	0.96
83	Familiar	Congruent	Feedback	85	0.96
84	Familiar	Congruent	Feedback	86	0.95
85	Familiar	Congruent	Feedback	87	0.84
86	Familiar	Congruent	Feedback	88	0.97
87	Familiar	Congruent	Feedback	89	0.94
88	Familiar	Congruent	Feedback	90	0.87
89	Familiar	Congruent	Feedback	91	0.89
90	Familiar	Congruent	Feedback	92	0.95
91	Familiar	Congruent	Feedback	93	0.96
92	Familiar	Congruent	Feedback	94	0.98
93	Familiar	Congruent	Feedback	95	0.95
94	Familiar	Congruent	Feedback	96	0.96
95	Familiar	Congruent	Feedback	97	0.89
96	Familiar	Congruent	Feedback	98	0.96
97	Familiar	Congruent	Feedback	99	0.87
98	Familiar	Congruent	Feedback	100	0.98
99	Familiar	Congruent	Feedback	101	0.82
100	Familiar	Congruent	Feedback	102	0.99
101	Familiar	Congruent	Feedback	103	0.93
102	Familiar	Congruent	Feedback	104	0.96
103	Familiar	Congruent	Feedback	105	0.93
104	Familiar	Congruent	Feedback	106	0.84
105	Familiar	Congruent	NoFeedback	1	0.81
106	Familiar	Congruent	NoFeedback	2	0.97
107	Familiar	Congruent	NoFeedback	3	0.96
108	Familiar	Congruent	NoFeedback	4	0.92
109	Familiar	Congruent	NoFeedback	5	0.97
110	Familiar	Congruent	NoFeedback	6	0.93
111	Familiar	Congruent	NoFeedback	7	0.87
112	Familiar	Congruent	NoFeedback	8	0.95
113	Familiar	Congruent	NoFeedback	9	0.91
114	Familiar	Congruent	NoFeedback	10	0.89
115	Familiar	Congruent	NoFeedback	11	0.95
116	Familiar	Congruent	NoFeedback	12	0.98
117	Familiar	Congruent	NoFeedback	13	0.92
118	Familiar	Congruent	NoFeedback	14	0.91
119	Familiar	Congruent	NoFeedback	15	0.98
120	Familiar	Congruent	NoFeedback	16	0.96
121	Familiar	Congruent	NoFeedback	18	1
122	Familiar	Congruent	NoFeedback	19	0.87
123	Familiar	Congruent	NoFeedback	20	0.98
124	Familiar	Congruent	NoFeedback	21	0.94
125	Familiar	Congruent	NoFeedback	22	0.92
126	Familiar	Congruent	NoFeedback	23	0.97
127	Familiar	Congruent	NoFeedback	24	0.95
128	Familiar	Congruent	NoFeedback	25	0.96
129	Familiar	Congruent	NoFeedback	26	0.97
130	Familiar	Congruent	NoFeedback	27	0.88
131	Familiar	Congruent	NoFeedback	28	0.92
132	Familiar	Congruent	NoFeedback	29	0.93
133	Familiar	Congruent	NoFeedback	30	0.89
134	Familiar	Congruent	NoFeedback	31	0.82
135	Familiar	Congruent	NoFeedback	32	0.88
136	Familiar	Congruent	NoFeedback	33	0.87
137	Familiar	Congruent	NoFeedback	34	0.99
138	Familiar	Congruent	NoFeedback	35	0.95
139	Familiar	Congruent	NoFeedback	36	0.84
141	Familiar	Congruent	NoFeedback	38	0.96
142	Familiar	Congruent	NoFeedback	39	0.91
143	Familiar	Congruent	NoFeedback	40	0.89
144	Familiar	Congruent	NoFeedback	41	0.78
145	Familiar	Congruent	NoFeedback	42	0.97
146	Familiar	Congruent	NoFeedback	43	0.96
147	Familiar	Congruent	NoFeedback	44	0.7
148	Familiar	Congruent	NoFeedback	45	0.94
149	Familiar	Congruent	NoFeedback	46	0.9
150	Familiar	Congruent	NoFeedback	47	0.79
151	Familiar	Congruent	NoFeedback	48	0.88
152	Familiar	Congruent	NoFeedback	49	0.91
153	Familiar	Congruent	NoFeedback	50	0.89
154	Familiar	Congruent	NoFeedback	51	0.98
155	Familiar	Congruent	NoFeedback	52	0.98
156	Familiar	Congruent	NoFeedback	53	0.94
157	Familiar	Congruent	NoFeedback	54	0.83
158	Familiar	Congruent	NoFeedback	55	0.93
159	Familiar	Congruent	NoFeedback	56	0.81
160	Familiar	Congruent	NoFeedback	57	0.87
161	Familiar	Congruent	NoFeedback	58	0.95
162	Familiar	Congruent	NoFeedback	59	0.96
163	Familiar	Congruent	NoFeedback	60	0.99
164	Familiar	Congruent	NoFeedback	61	0.92
165	Familiar	Congruent	NoFeedback	62	0.87
166	Familiar	Congruent	NoFeedback	63	0.96
167	Familiar	Congruent	NoFeedback	64	0.94
168	Familiar	Congruent	NoFeedback	65	0.94
169	Familiar	Congruent	NoFeedback	66	0.98
170	Familiar	Congruent	NoFeedback	67	0.97
171	Familiar	Congruent	NoFeedback	68	0.95
172	Familiar	Congruent	NoFeedback	69	0.99
173	Familiar	Congruent	NoFeedback	70	0.95
174	Familiar	Congruent	NoFeedback	71	0.95
175	Familiar	Congruent	NoFeedback	72	0.68
176	Familiar	Congruent	NoFeedback	73	0.95
177	Familiar	Congruent	NoFeedback	74	0.79
178	Familiar	Congruent	NoFeedback	75	0.88
179	Familiar	Congruent	NoFeedback	76	0.97
180	Familiar	Congruent	NoFeedback	77	0.98
181	Familiar	Congruent	NoFeedback	78	0.89
182	Familiar	Congruent	NoFeedback	79	0.55
183	Familiar	Congruent	NoFeedback	80	0.89
184	Familiar	Congruent	NoFeedback	81	0.88
185	Familiar	Congruent	NoFeedback	82	0.94
186	Familiar	Congruent	NoFeedback	83	0.79
187	Familiar	Congruent	NoFeedback	84	0.94
188	Familiar	Congruent	NoFeedback	85	0.95
189	Familiar	Congruent	NoFeedback	86	0.94
190	Familiar	Congruent	NoFeedback	87	0.97
191	Familiar	Congruent	NoFeedback	88	0.91
192	Familiar	Congruent	NoFeedback	89	0.84
193	Familiar	Congruent	NoFeedback	90	0.88
194	Familiar	Congruent	NoFeedback	91	0.94
195	Familiar	Congruent	NoFeedback	92	0.88
196	Familiar	Congruent	NoFeedback	93	0.91
197	Familiar	Congruent	NoFeedback	94	0.91
198	Familiar	Congruent	NoFeedback	95	0.97
199	Familiar	Congruent	NoFeedback	96	1
200	Familiar	Congruent	NoFeedback	97	0.74
201	Familiar	Congruent	NoFeedback	98	0.88
202	Familiar	Congruent	NoFeedback	99	0.94
203	Familiar	Congruent	NoFeedback	100	0.92
204	Familiar	Congruent	NoFeedback	101	0.7
205	Familiar	Congruent	NoFeedback	102	0.86
206	Familiar	Congruent	NoFeedback	103	0.97
207	Familiar	Congruent	NoFeedback	104	0.93
208	Familiar	Congruent	NoFeedback	105	0.88
209	Familiar	Congruent	NoFeedback	106	0.4
210	Familiar	Incongruent	Feedback	1	0.88
211	Familiar	Incongruent	Feedback	2	0.99
212	Familiar	Incongruent	Feedback	3	0.94
213	Familiar	Incongruent	Feedback	4	0.98
214	Familiar	Incongruent	Feedback	5	0.96
215	Familiar	Incongruent	Feedback	6	1
216	Familiar	Incongruent	Feedback	7	0.94
217	Familiar	Incongruent	Feedback	8	0.95
218	Familiar	Incongruent	Feedback	9	0.89
219	Familiar	Incongruent	Feedback	10	0.97
220	Familiar	Incongruent	Feedback	11	0.94
221	Familiar	Incongruent	Feedback	12	0.99
222	Familiar	Incongruent	Feedback	13	0.91
223	Familiar	Incongruent	Feedback	14	0.93
224	Familiar	Incongruent	Feedback	15	0.96
225	Familiar	Incongruent	Feedback	16	0.99
226	Familiar	Incongruent	Feedback	18	1
227	Familiar	Incongruent	Feedback	19	0.95
228	Familiar	Incongruent	Feedback	20	0.96
229	Familiar	Incongruent	Feedback	21	0.93
230	Familiar	Incongruent	Feedback	22	0.99
231	Familiar	Incongruent	Feedback	23	1
232	Familiar	Incongruent	Feedback	24	0.97
233	Familiar	Incongruent	Feedback	25	0.98
234	Familiar	Incongruent	Feedback	26	0.88
235	Familiar	Incongruent	Feedback	27	0.91
236	Familiar	Incongruent	Feedback	28	0.95
237	Familiar	Incongruent	Feedback	29	0.95
238	Familiar	Incongruent	Feedback	30	0.9
239	Familiar	Incongruent	Feedback	31	0.94
240	Familiar	Incongruent	Feedback	32	0.93
241	Familiar	Incongruent	Feedback	33	0.88
242	Familiar	Incongruent	Feedback	34	0.93
243	Familiar	Incongruent	Feedback	35	0.99
244	Familiar	Incongruent	Feedback	36	0.83
245	Familiar	Incongruent	Feedback	38	0.9
246	Familiar	Incongruent	Feedback	39	0.95
247	Familiar	Incongruent	Feedback	40	0.96
248	Familiar	Incongruent	Feedback	41	0.78
249	Familiar	Incongruent	Feedback	42	0.99
250	Familiar	Incongruent	Feedback	43	0.97
251	Familiar	Incongruent	Feedback	44	0.83
252	Familiar	Incongruent	Feedback	45	0.92
253	Familiar	Incongruent	Feedback	46	0.98
254	Familiar	Incongruent	Feedback	47	0.98
255	Familiar	Incongruent	Feedback	48	0.95
256	Familiar	Incongruent	Feedback	49	0.97
257	Familiar	Incongruent	Feedback	50	0.93
258	Familiar	Incongruent	Feedback	51	0.94
259	Familiar	Incongruent	Feedback	52	0.93
260	Familiar	Incongruent	Feedback	53	0.97
261	Familiar	Incongruent	Feedback	54	0.94
262	Familiar	Incongruent	Feedback	55	0.92
263	Familiar	Incongruent	Feedback	56	0.81
264	Familiar	Incongruent	Feedback	57	0.92
265	Familiar	Incongruent	Feedback	58	0.99
266	Familiar	Incongruent	Feedback	59	0.96
267	Familiar	Incongruent	Feedback	60	0.94
268	Familiar	Incongruent	Feedback	61	0.98
269	Familiar	Incongruent	Feedback	62	0.95
270	Familiar	Incongruent	Feedback	63	0.93
271	Familiar	Incongruent	Feedback	64	0.97
272	Familiar	Incongruent	Feedback	65	0.98
273	Familiar	Incongruent	Feedback	66	0.96
274	Familiar	Incongruent	Feedback	67	0.98
275	Familiar	Incongruent	Feedback	68	0.95
276	Familiar	Incongruent	Feedback	69	0.98
277	Familiar	Incongruent	Feedback	70	0.99
278	Familiar	Incongruent	Feedback	71	0.95
279	Familiar	Incongruent	Feedback	72	0.88
280	Familiar	Incongruent	Feedback	73	0.96
281	Familiar	Incongruent	Feedback	74	0.73
282	Familiar	Incongruent	Feedback	75	0.92
283	Familiar	Incongruent	Feedback	76	0.99
284	Familiar	Incongruent	Feedback	77	0.95
285	Familiar	Incongruent	Feedback	78	0.94
286	Familiar	Incongruent	Feedback	79	0.82
287	Familiar	Incongruent	Feedback	80	0.93
288	Familiar	Incongruent	Feedback	81	0.96
289	Familiar	Incongruent	Feedback	82	0.95
290	Familiar	Incongruent	Feedback	83	0.72
291	Familiar	Incongruent	Feedback	84	0.99
292	Familiar	Incongruent	Feedback	85	0.97
293	Familiar	Incongruent	Feedback	86	0.96
294	Familiar	Incongruent	Feedback	87	0.95
295	Familiar	Incongruent	Feedback	88	0.93
296	Familiar	Incongruent	Feedback	89	0.94
297	Familiar	Incongruent	Feedback	90	0.87
298	Familiar	Incongruent	Feedback	91	0.91
299	Familiar	Incongruent	Feedback	92	0.88
300	Familiar	Incongruent	Feedback	93	0.96
301	Familiar	Incongruent	Feedback	94	0.94
302	Familiar	Incongruent	Feedback	95	0.95
303	Familiar	Incongruent	Feedback	96	0.99
304	Familiar	Incongruent	Feedback	97	0.91
305	Familiar	Incongruent	Feedback	98	0.93
306	Familiar	Incongruent	Feedback	99	0.85
307	Familiar	Incongruent	Feedback	100	0.96
308	Familiar	Incongruent	Feedback	101	0.97
309	Familiar	Incongruent	Feedback	102	0.98
310	Familiar	Incongruent	Feedback	103	0.98
311	Familiar	Incongruent	Feedback	104	0.92
312	Familiar	Incongruent	Feedback	105	0.97
313	Familiar	Incongruent	Feedback	106	0.93
314	Familiar	Incongruent	NoFeedback	1	0.77
315	Familiar	Incongruent	NoFeedback	2	0.96
316	Familiar	Incongruent	NoFeedback	3	0.93
317	Familiar	Incongruent	NoFeedback	4	0.95
318	Familiar	Incongruent	NoFeedback	5	0.95
319	Familiar	Incongruent	NoFeedback	6	0.92
320	Familiar	Incongruent	NoFeedback	7	0.83
321	Familiar	Incongruent	NoFeedback	8	0.95
322	Familiar	Incongruent	NoFeedback	9	0.88
323	Familiar	Incongruent	NoFeedback	10	0.86
324	Familiar	Incongruent	NoFeedback	11	0.97
325	Familiar	Incongruent	NoFeedback	12	0.96
326	Familiar	Incongruent	NoFeedback	13	0.89
327	Familiar	Incongruent	NoFeedback	14	0.92
328	Familiar	Incongruent	NoFeedback	15	0.9
329	Familiar	Incongruent	NoFeedback	16	0.96
330	Familiar	Incongruent	NoFeedback	18	0.97
331	Familiar	Incongruent	NoFeedback	19	0.86
332	Familiar	Incongruent	NoFeedback	20	0.94
333	Familiar	Incongruent	NoFeedback	21	0.89
334	Familiar	Incongruent	NoFeedback	22	0.88
335	Familiar	Incongruent	NoFeedback	23	0.95
336	Familiar	Incongruent	NoFeedback	24	0.9
337	Familiar	Incongruent	NoFeedback	25	0.91
338	Familiar	Incongruent	NoFeedback	26	0.88
339	Familiar	Incongruent	NoFeedback	27	0.76
340	Familiar	Incongruent	NoFeedback	28	0.97
341	Familiar	Incongruent	NoFeedback	29	0.96
342	Familiar	Incongruent	NoFeedback	30	0.77
343	Familiar	Incongruent	NoFeedback	31	0.85
344	Familiar	Incongruent	NoFeedback	32	0.9
345	Familiar	Incongruent	NoFeedback	33	0.9
346	Familiar	Incongruent	NoFeedback	34	0.97
347	Familiar	Incongruent	NoFeedback	35	0.91
348	Familiar	Incongruent	NoFeedback	36	0.72
350	Familiar	Incongruent	NoFeedback	38	0.93
351	Familiar	Incongruent	NoFeedback	39	0.97
352	Familiar	Incongruent	NoFeedback	40	0.95
353	Familiar	Incongruent	NoFeedback	41	0.69
354	Familiar	Incongruent	NoFeedback	42	0.92
355	Familiar	Incongruent	NoFeedback	43	0.96
356	Familiar	Incongruent	NoFeedback	44	0.71
357	Familiar	Incongruent	NoFeedback	45	0.85
358	Familiar	Incongruent	NoFeedback	46	0.89
359	Familiar	Incongruent	NoFeedback	47	0.91
360	Familiar	Incongruent	NoFeedback	48	0.86
361	Familiar	Incongruent	NoFeedback	49	0.94
362	Familiar	Incongruent	NoFeedback	50	0.9
363	Familiar	Incongruent	NoFeedback	51	0.96
364	Familiar	Incongruent	NoFeedback	52	0.93
365	Familiar	Incongruent	NoFeedback	53	0.97
366	Familiar	Incongruent	NoFeedback	54	0.81
367	Familiar	Incongruent	NoFeedback	55	0.94
368	Familiar	Incongruent	NoFeedback	56	0.77
369	Familiar	Incongruent	NoFeedback	57	0.85
370	Familiar	Incongruent	NoFeedback	58	0.98
371	Familiar	Incongruent	NoFeedback	59	0.89
372	Familiar	Incongruent	NoFeedback	60	0.95
373	Familiar	Incongruent	NoFeedback	61	0.75
374	Familiar	Incongruent	NoFeedback	62	0.81
375	Familiar	Incongruent	NoFeedback	63	0.95
376	Familiar	Incongruent	NoFeedback	64	0.91
377	Familiar	Incongruent	NoFeedback	65	0.84
378	Familiar	Incongruent	NoFeedback	66	0.93
379	Familiar	Incongruent	NoFeedback	67	0.98
380	Familiar	Incongruent	NoFeedback	68	0.9
381	Familiar	Incongruent	NoFeedback	69	0.99
382	Familiar	Incongruent	NoFeedback	70	0.93
383	Familiar	Incongruent	NoFeedback	71	0.98
384	Familiar	Incongruent	NoFeedback	72	0.92
385	Familiar	Incongruent	NoFeedback	73	0.93
386	Familiar	Incongruent	NoFeedback	74	0.82
387	Familiar	Incongruent	NoFeedback	75	0.79
388	Familiar	Incongruent	NoFeedback	76	0.97
389	Familiar	Incongruent	NoFeedback	77	0.95
390	Familiar	Incongruent	NoFeedback	78	0.78
391	Familiar	Incongruent	NoFeedback	79	0.27
392	Familiar	Incongruent	NoFeedback	80	0.87
393	Familiar	Incongruent	NoFeedback	81	0.92
394	Familiar	Incongruent	NoFeedback	82	0.83
395	Familiar	Incongruent	NoFeedback	83	0.78
396	Familiar	Incongruent	NoFeedback	84	0.97
397	Familiar	Incongruent	NoFeedback	85	0.95
398	Familiar	Incongruent	NoFeedback	86	0.91
399	Familiar	Incongruent	NoFeedback	87	0.88
400	Familiar	Incongruent	NoFeedback	88	0.88
401	Familiar	Incongruent	NoFeedback	89	0.86
402	Familiar	Incongruent	NoFeedback	90	0.88
403	Familiar	Incongruent	NoFeedback	91	0.89
404	Familiar	Incongruent	NoFeedback	92	0.93
405	Familiar	Incongruent	NoFeedback	93	0.94
406	Familiar	Incongruent	NoFeedback	94	0.91
407	Familiar	Incongruent	NoFeedback	95	0.96
408	Familiar	Incongruent	NoFeedback	96	0.98
409	Familiar	Incongruent	NoFeedback	97	0.65
410	Familiar	Incongruent	NoFeedback	98	0.82
411	Familiar	Incongruent	NoFeedback	99	0.8
412	Familiar	Incongruent	NoFeedback	100	0.92
413	Familiar	Incongruent	NoFeedback	101	0.77
414	Familiar	Incongruent	NoFeedback	102	0.79
415	Familiar	Incongruent	NoFeedback	103	0.83
416	Familiar	Incongruent	NoFeedback	104	0.87
417	Familiar	Incongruent	NoFeedback	105	0.93
418	Familiar	Incongruent	NoFeedback	106	0.43
419	Novel	Congruent	NoFeedback	1	0.77
420	Novel	Congruent	NoFeedback	2	0.95
421	Novel	Congruent	NoFeedback	3	0.93
422	Novel	Congruent	NoFeedback	4	0.92
423	Novel	Congruent	NoFeedback	5	0.93
424	Novel	Congruent	NoFeedback	6	0.93
425	Novel	Congruent	NoFeedback	7	0.94
426	Novel	Congruent	NoFeedback	8	0.98
427	Novel	Congruent	NoFeedback	9	0.87
428	Novel	Congruent	NoFeedback	10	0.89
429	Novel	Congruent	NoFeedback	11	0.9
430	Novel	Congruent	NoFeedback	12	0.9
431	Novel	Congruent	NoFeedback	13	0.92
432	Novel	Congruent	NoFeedback	14	0.81
433	Novel	Congruent	NoFeedback	15	0.9
434	Novel	Congruent	NoFeedback	16	0.99
436	Novel	Congruent	NoFeedback	18	0.96
437	Novel	Congruent	NoFeedback	19	0.87
438	Novel	Congruent	NoFeedback	20	0.94
439	Novel	Congruent	NoFeedback	21	0.94
440	Novel	Congruent	NoFeedback	22	0.93
441	Novel	Congruent	NoFeedback	23	0.97
442	Novel	Congruent	NoFeedback	24	0.96
443	Novel	Congruent	NoFeedback	25	0.96
444	Novel	Congruent	NoFeedback	26	0.89
445	Novel	Congruent	NoFeedback	27	0.81
446	Novel	Congruent	NoFeedback	28	0.92
447	Novel	Congruent	NoFeedback	29	0.91
448	Novel	Congruent	NoFeedback	30	0.83
449	Novel	Congruent	NoFeedback	31	0.9
450	Novel	Congruent	NoFeedback	32	0.89
451	Novel	Congruent	NoFeedback	33	0.84
452	Novel	Congruent	NoFeedback	34	0.97
453	Novel	Congruent	NoFeedback	35	0.91
454	Novel	Congruent	NoFeedback	36	0.75
456	Novel	Congruent	NoFeedback	38	0.87
457	Novel	Congruent	NoFeedback	39	0.89
458	Novel	Congruent	NoFeedback	40	0.9
459	Novel	Congruent	NoFeedback	41	0.72
460	Novel	Congruent	NoFeedback	42	0.92
461	Novel	Congruent	NoFeedback	43	0.94
462	Novel	Congruent	NoFeedback	44	0.73
463	Novel	Congruent	NoFeedback	45	0.89
464	Novel	Congruent	NoFeedback	46	0.81
465	Novel	Congruent	NoFeedback	47	0.92
466	Novel	Congruent	NoFeedback	48	0.81
467	Novel	Congruent	NoFeedback	49	0.97
468	Novel	Congruent	NoFeedback	50	0.88
469	Novel	Congruent	NoFeedback	51	0.99
470	Novel	Congruent	NoFeedback	52	0.98
471	Novel	Congruent	NoFeedback	53	0.97
472	Novel	Congruent	NoFeedback	54	0.93
473	Novel	Congruent	NoFeedback	55	0.83
474	Novel	Congruent	NoFeedback	56	0.71
475	Novel	Congruent	NoFeedback	57	0.92
476	Novel	Congruent	NoFeedback	58	0.96
477	Novel	Congruent	NoFeedback	59	0.93
478	Novel	Congruent	NoFeedback	60	0.96
479	Novel	Congruent	NoFeedback	61	0.97
480	Novel	Congruent	NoFeedback	62	0.84
481	Novel	Congruent	NoFeedback	63	0.91
482	Novel	Congruent	NoFeedback	64	0.92
483	Novel	Congruent	NoFeedback	65	0.92
484	Novel	Congruent	NoFeedback	66	0.92
485	Novel	Congruent	NoFeedback	67	0.95
486	Novel	Congruent	NoFeedback	68	0.85
487	Novel	Congruent	NoFeedback	69	0.93
488	Novel	Congruent	NoFeedback	70	0.9
489	Novel	Congruent	NoFeedback	71	0.94
490	Novel	Congruent	NoFeedback	72	0.9
491	Novel	Congruent	NoFeedback	73	0.88
492	Novel	Congruent	NoFeedback	74	0.81
493	Novel	Congruent	NoFeedback	75	0.8
494	Novel	Congruent	NoFeedback	76	0.95
495	Novel	Congruent	NoFeedback	77	0.9
496	Novel	Congruent	NoFeedback	78	0.84
497	Novel	Congruent	NoFeedback	79	0.44
498	Novel	Congruent	NoFeedback	80	0.9
499	Novel	Congruent	NoFeedback	81	0.9
500	Novel	Congruent	NoFeedback	82	0.76
501	Novel	Congruent	NoFeedback	83	0.63
502	Novel	Congruent	NoFeedback	84	0.96
503	Novel	Congruent	NoFeedback	85	0.93
504	Novel	Congruent	NoFeedback	86	0.95
505	Novel	Congruent	NoFeedback	87	0.94
506	Novel	Congruent	NoFeedback	88	0.91
507	Novel	Congruent	NoFeedback	89	0.92
508	Novel	Congruent	NoFeedback	90	0.86
509	Novel	Congruent	NoFeedback	91	0.76
510	Novel	Congruent	NoFeedback	92	0.87
511	Novel	Congruent	NoFeedback	93	0.8
512	Novel	Congruent	NoFeedback	94	0.89
513	Novel	Congruent	NoFeedback	95	0.92
514	Novel	Congruent	NoFeedback	96	0.98
515	Novel	Congruent	NoFeedback	97	0.82
516	Novel	Congruent	NoFeedback	98	0.9
517	Novel	Congruent	NoFeedback	99	0.89
518	Novel	Congruent	NoFeedback	100	0.95
519	Novel	Congruent	NoFeedback	101	0.56
520	Novel	Congruent	NoFeedback	102	0.87
521	Novel	Congruent	NoFeedback	103	0.91
522	Novel	Congruent	NoFeedback	104	0.8
523	Novel	Congruent	NoFeedback	105	0.92
524	Novel	Congruent	NoFeedback	106	0.53
525	Novel	Incongruent	NoFeedback	1	0.83
526	Novel	Incongruent	NoFeedback	2	1
527	Novel	Incongruent	NoFeedback	3	0.91
528	Novel	Incongruent	NoFeedback	4	0.91
529	Novel	Incongruent	NoFeedback	5	0.95
530	Novel	Incongruent	NoFeedback	6	0.89
531	Novel	Incongruent	NoFeedback	7	0.94
532	Novel	Incongruent	NoFeedback	8	0.88
533	Novel	Incongruent	NoFeedback	9	0.82
534	Novel	Incongruent	NoFeedback	10	0.94
535	Novel	Incongruent	NoFeedback	11	0.91
536	Novel	Incongruent	NoFeedback	12	0.85
537	Novel	Incongruent	NoFeedback	13	0.9
538	Novel	Incongruent	NoFeedback	14	0.82
539	Novel	Incongruent	NoFeedback	15	0.95
540	Novel	Incongruent	NoFeedback	16	0.99
542	Novel	Incongruent	NoFeedback	18	1
543	Novel	Incongruent	NoFeedback	19	0.88
544	Novel	Incongruent	NoFeedback	20	0.94
545	Novel	Incongruent	NoFeedback	21	0.96
546	Novel	Incongruent	NoFeedback	22	0.91
547	Novel	Incongruent	NoFeedback	23	0.98
548	Novel	Incongruent	NoFeedback	24	0.97
549	Novel	Incongruent	NoFeedback	25	0.97
550	Novel	Incongruent	NoFeedback	26	0.95
551	Novel	Incongruent	NoFeedback	27	0.86
552	Novel	Incongruent	NoFeedback	28	0.92
553	Novel	Incongruent	NoFeedback	29	0.88
554	Novel	Incongruent	NoFeedback	30	0.88
555	Novel	Incongruent	NoFeedback	31	0.87
556	Novel	Incongruent	NoFeedback	32	0.94
557	Novel	Incongruent	NoFeedback	33	0.83
558	Novel	Incongruent	NoFeedback	34	0.92
559	Novel	Incongruent	NoFeedback	35	0.94
560	Novel	Incongruent	NoFeedback	36	0.82
562	Novel	Incongruent	NoFeedback	38	0.88
563	Novel	Incongruent	NoFeedback	39	0.94
564	Novel	Incongruent	NoFeedback	40	0.89
565	Novel	Incongruent	NoFeedback	41	0.72
566	Novel	Incongruent	NoFeedback	42	0.94
567	Novel	Incongruent	NoFeedback	43	0.94
568	Novel	Incongruent	NoFeedback	44	0.79
569	Novel	Incongruent	NoFeedback	45	0.93
570	Novel	Incongruent	NoFeedback	46	0.79
571	Novel	Incongruent	NoFeedback	47	0.94
572	Novel	Incongruent	NoFeedback	48	0.88
573	Novel	Incongruent	NoFeedback	49	0.95
574	Novel	Incongruent	NoFeedback	50	0.91
575	Novel	Incongruent	NoFeedback	51	0.96
576	Novel	Incongruent	NoFeedback	52	0.95
577	Novel	Incongruent	NoFeedback	53	0.99
578	Novel	Incongruent	NoFeedback	54	0.92
579	Novel	Incongruent	NoFeedback	55	0.9
580	Novel	Incongruent	NoFeedback	56	0.7
581	Novel	Incongruent	NoFeedback	57	0.9
582	Novel	Incongruent	NoFeedback	58	0.95
583	Novel	Incongruent	NoFeedback	59	0.94
584	Novel	Incongruent	NoFeedback	60	0.94
585	Novel	Incongruent	NoFeedback	61	0.87
586	Novel	Incongruent	NoFeedback	62	0.88
587	Novel	Incongruent	NoFeedback	63	0.9
588	Novel	Incongruent	NoFeedback	64	0.93
589	Novel	Incongruent	NoFeedback	65	0.86
590	Novel	Incongruent	NoFeedback	66	0.89
591	Novel	Incongruent	NoFeedback	67	0.99
592	Novel	Incongruent	NoFeedback	68	0.91
593	Novel	Incongruent	NoFeedback	69	0.95
594	Novel	Incongruent	NoFeedback	70	0.95
595	Novel	Incongruent	NoFeedback	71	0.9
596	Novel	Incongruent	NoFeedback	72	0.87
597	Novel	Incongruent	NoFeedback	73	0.9
598	Novel	Incongruent	NoFeedback	74	0.66
599	Novel	Incongruent	NoFeedback	75	0.85
600	Novel	Incongruent	NoFeedback	76	0.97
601	Novel	Incongruent	NoFeedback	77	0.92
602	Novel	Incongruent	NoFeedback	78	0.82
603	Novel	Incongruent	NoFeedback	79	0.81
604	Novel	Incongruent	NoFeedback	80	0.81
605	Novel	Incongruent	NoFeedback	81	0.91
606	Novel	Incongruent	NoFeedback	82	0.73
607	Novel	Incongruent	NoFeedback	83	0.74
608	Novel	Incongruent	NoFeedback	84	0.95
609	Novel	Incongruent	NoFeedback	85	0.95
610	Novel	Incongruent	NoFeedback	86	0.92
611	Novel	Incongruent	NoFeedback	87	0.94
612	Novel	Incongruent	NoFeedback	88	0.75
613	Novel	Incongruent	NoFeedback	89	0.9
614	Novel	Incongruent	NoFeedback	90	0.78
615	Novel	Incongruent	NoFeedback	91	0.81
616	Novel	Incongruent	NoFeedback	92	0.94
617	Novel	Incongruent	NoFeedback	93	0.85
618	Novel	Incongruent	NoFeedback	94	0.91
619	Novel	Incongruent	NoFeedback	95	0.96
620	Novel	Incongruent	NoFeedback	96	0.98
621	Novel	Incongruent	NoFeedback	97	0.68
622	Novel	Incongruent	NoFeedback	98	0.9
623	Novel	Incongruent	NoFeedback	99	0.84
624	Novel	Incongruent	NoFeedback	100	0.93
625	Novel	Incongruent	NoFeedback	101	0.66
626	Novel	Incongruent	NoFeedback	102	0.87
627	Novel	Incongruent	NoFeedback	103	0.96
628	Novel	Incongruent	NoFeedback	104	0.9
629	Novel	Incongruent	NoFeedback	105	0.97
630	Novel	Incongruent	NoFeedback	106	0.77
