# Supplementary material for: Habit Expression and Disruption as a Function of Attention-Deficit/Hyperactivity Disorder Symptomology
Source: Front Psychol. 2019 Sep 3;10:1997. doi: 10.3389/fpsyg.2019.01997 (PMC6733985; doi:10.3389/fpsyg.2019.01997)
Supplement: Supplementary file 1 [file Data_Sheet_1.ZIP › gostatssheetRT_full.csv]

	StimulusType	Congruency	FeedbackCond	Subject	RT
0	Familiar	Congruent	Feedback	1	307.5217391
1	Familiar	Congruent	Feedback	2	299.7755102
2	Familiar	Congruent	Feedback	3	288.3838384
3	Familiar	Congruent	Feedback	4	299.2921348
4	Familiar	Congruent	Feedback	5	286.39
5	Familiar	Congruent	Feedback	6	306.0515464
6	Familiar	Congruent	Feedback	7	306.7263158
7	Familiar	Congruent	Feedback	8	317.5483871
8	Familiar	Congruent	Feedback	9	290.4659091
9	Familiar	Congruent	Feedback	10	281.1020408
10	Familiar	Congruent	Feedback	11	298.6597938
11	Familiar	Congruent	Feedback	12	267.1717172
12	Familiar	Congruent	Feedback	13	308.5157895
13	Familiar	Congruent	Feedback	14	306.956044
14	Familiar	Congruent	Feedback	15	292.4574468
15	Familiar	Congruent	Feedback	16	291.0510204
17	Familiar	Congruent	Feedback	18	264.59
18	Familiar	Congruent	Feedback	19	270.2105263
19	Familiar	Congruent	Feedback	20	290.6185567
20	Familiar	Congruent	Feedback	21	283.8541667
21	Familiar	Congruent	Feedback	22	272.8865979
22	Familiar	Congruent	Feedback	23	301.06
23	Familiar	Congruent	Feedback	24	279.0421053
24	Familiar	Congruent	Feedback	25	283.9793814
25	Familiar	Congruent	Feedback	26	291.4105263
26	Familiar	Congruent	Feedback	27	313.5934066
27	Familiar	Congruent	Feedback	28	286.4193548
28	Familiar	Congruent	Feedback	29	284.7272727
29	Familiar	Congruent	Feedback	30	323.3586957
30	Familiar	Congruent	Feedback	31	305.9111111
31	Familiar	Congruent	Feedback	32	278.5517241
32	Familiar	Congruent	Feedback	33	295.25
33	Familiar	Congruent	Feedback	34	269.1414141
34	Familiar	Congruent	Feedback	35	284
35	Familiar	Congruent	Feedback	36	235.7294118
36	Familiar	Congruent	Feedback	38	309.8421053
37	Familiar	Congruent	Feedback	39	289
38	Familiar	Congruent	Feedback	40	296.7684211
39	Familiar	Congruent	Feedback	41	301.9493671
40	Familiar	Congruent	Feedback	42	284.6354167
41	Familiar	Congruent	Feedback	43	307.5520833
42	Familiar	Congruent	Feedback	44	292.0659341
43	Familiar	Congruent	Feedback	45	288.7222222
44	Familiar	Congruent	Feedback	46	304.2040816
45	Familiar	Congruent	Feedback	47	259.9772727
46	Familiar	Congruent	Feedback	48	313.2365591
47	Familiar	Congruent	Feedback	49	286.8282828
48	Familiar	Congruent	Feedback	50	321.8777778
49	Familiar	Congruent	Feedback	51	267.8571429
50	Familiar	Congruent	Feedback	52	286.9361702
51	Familiar	Congruent	Feedback	53	290.4
52	Familiar	Congruent	Feedback	54	296.7604167
53	Familiar	Congruent	Feedback	55	280.4086022
54	Familiar	Congruent	Feedback	56	307.7840909
55	Familiar	Congruent	Feedback	57	322.9354839
56	Familiar	Congruent	Feedback	58	284.9183673
57	Familiar	Congruent	Feedback	59	281.1134021
58	Familiar	Congruent	Feedback	60	264.1
59	Familiar	Congruent	Feedback	61	298.71875
60	Familiar	Congruent	Feedback	62	313.8085106
61	Familiar	Congruent	Feedback	63	273.8659794
62	Familiar	Congruent	Feedback	64	287.7052632
63	Familiar	Congruent	Feedback	65	299.3052632
64	Familiar	Congruent	Feedback	66	314.7303371
65	Familiar	Congruent	Feedback	67	277.1752577
66	Familiar	Congruent	Feedback	68	295.8602151
67	Familiar	Congruent	Feedback	69	297.4123711
68	Familiar	Congruent	Feedback	70	297.020202
69	Familiar	Congruent	Feedback	71	319.9569892
70	Familiar	Congruent	Feedback	72	286.8148148
71	Familiar	Congruent	Feedback	73	258.3263158
72	Familiar	Congruent	Feedback	74	305.1728395
73	Familiar	Congruent	Feedback	75	298.6404494
74	Familiar	Congruent	Feedback	76	277.02
75	Familiar	Congruent	Feedback	77	268.6464646
76	Familiar	Congruent	Feedback	78	311.877551
77	Familiar	Congruent	Feedback	79	315.5316456
78	Familiar	Congruent	Feedback	80	301.8505747
79	Familiar	Congruent	Feedback	81	297.8210526
80	Familiar	Congruent	Feedback	82	274.6382979
81	Familiar	Congruent	Feedback	83	363.3333333
82	Familiar	Congruent	Feedback	84	278.8125
83	Familiar	Congruent	Feedback	85	307.6041667
84	Familiar	Congruent	Feedback	86	295.4526316
85	Familiar	Congruent	Feedback	87	185.6941176
86	Familiar	Congruent	Feedback	88	288.9896907
87	Familiar	Congruent	Feedback	89	279.3617021
88	Familiar	Congruent	Feedback	90	286.2873563
89	Familiar	Congruent	Feedback	91	296.8876404
90	Familiar	Congruent	Feedback	92	287.5684211
91	Familiar	Congruent	Feedback	93	308.6145833
92	Familiar	Congruent	Feedback	94	290.7244898
93	Familiar	Congruent	Feedback	95	290.2631579
94	Familiar	Congruent	Feedback	96	294.2680412
95	Familiar	Congruent	Feedback	97	322.0449438
96	Familiar	Congruent	Feedback	98	309.3541667
97	Familiar	Congruent	Feedback	99	275.1609195
98	Familiar	Congruent	Feedback	100	296.1122449
99	Familiar	Congruent	Feedback	101	304.6829268
100	Familiar	Congruent	Feedback	102	295.5656566
101	Familiar	Congruent	Feedback	103	307.6236559
102	Familiar	Congruent	Feedback	104	299.7708333
103	Familiar	Congruent	Feedback	105	316.5053763
104	Familiar	Congruent	Feedback	106	296.8214286
105	Familiar	Congruent	NoFeedback	1	327.9506173
106	Familiar	Congruent	NoFeedback	2	288.6597938
107	Familiar	Congruent	NoFeedback	3	297.7395833
108	Familiar	Congruent	NoFeedback	4	296.4782609
109	Familiar	Congruent	NoFeedback	5	304.1134021
110	Familiar	Congruent	NoFeedback	6	322.3548387
111	Familiar	Congruent	NoFeedback	7	297.7011494
112	Familiar	Congruent	NoFeedback	8	319.6842105
113	Familiar	Congruent	NoFeedback	9	306.7582418
114	Familiar	Congruent	NoFeedback	10	309.6404494
115	Familiar	Congruent	NoFeedback	11	298.6315789
116	Familiar	Congruent	NoFeedback	12	303.0816327
117	Familiar	Congruent	NoFeedback	13	314.923913
118	Familiar	Congruent	NoFeedback	14	296.8241758
119	Familiar	Congruent	NoFeedback	15	299.9591837
120	Familiar	Congruent	NoFeedback	16	280.0104167
121	Familiar	Congruent	NoFeedback	18	281.32
122	Familiar	Congruent	NoFeedback	19	313.4252874
123	Familiar	Congruent	NoFeedback	20	285.4693878
124	Familiar	Congruent	NoFeedback	21	297.8829787
125	Familiar	Congruent	NoFeedback	22	288.3804348
126	Familiar	Congruent	NoFeedback	23	319.6597938
127	Familiar	Congruent	NoFeedback	24	286.4315789
128	Familiar	Congruent	NoFeedback	25	298.5833333
129	Familiar	Congruent	NoFeedback	26	292.9072165
130	Familiar	Congruent	NoFeedback	27	335.4318182
131	Familiar	Congruent	NoFeedback	28	315.7173913
132	Familiar	Congruent	NoFeedback	29	296.2043011
133	Familiar	Congruent	NoFeedback	30	312.7977528
134	Familiar	Congruent	NoFeedback	31	326.2317073
135	Familiar	Congruent	NoFeedback	32	283.9659091
136	Familiar	Congruent	NoFeedback	33	307.8275862
137	Familiar	Congruent	NoFeedback	34	294.8080808
138	Familiar	Congruent	NoFeedback	35	288.9368421
139	Familiar	Congruent	NoFeedback	36	305.1785714
141	Familiar	Congruent	NoFeedback	38	304.6770833
142	Familiar	Congruent	NoFeedback	39	308.9120879
143	Familiar	Congruent	NoFeedback	40	293.9213483
144	Familiar	Congruent	NoFeedback	41	315.3333333
145	Familiar	Congruent	NoFeedback	42	294.4123711
146	Familiar	Congruent	NoFeedback	43	320.6875
147	Familiar	Congruent	NoFeedback	44	297.0857143
148	Familiar	Congruent	NoFeedback	45	315.7659574
149	Familiar	Congruent	NoFeedback	46	322.4777778
150	Familiar	Congruent	NoFeedback	47	257.7468354
151	Familiar	Congruent	NoFeedback	48	310.4772727
152	Familiar	Congruent	NoFeedback	49	293.4615385
153	Familiar	Congruent	NoFeedback	50	322.2134831
154	Familiar	Congruent	NoFeedback	51	291.2857143
155	Familiar	Congruent	NoFeedback	52	308.5714286
156	Familiar	Congruent	NoFeedback	53	277.9893617
157	Familiar	Congruent	NoFeedback	54	322.0843373
158	Familiar	Congruent	NoFeedback	55	306.7311828
159	Familiar	Congruent	NoFeedback	56	322.5061728
160	Familiar	Congruent	NoFeedback	57	305.183908
161	Familiar	Congruent	NoFeedback	58	297.9789474
162	Familiar	Congruent	NoFeedback	59	300.3645833
163	Familiar	Congruent	NoFeedback	60	275.2424242
164	Familiar	Congruent	NoFeedback	61	312.3369565
165	Familiar	Congruent	NoFeedback	62	329.7701149
166	Familiar	Congruent	NoFeedback	63	280.34375
167	Familiar	Congruent	NoFeedback	64	284.9148936
168	Familiar	Congruent	NoFeedback	65	287.6808511
169	Familiar	Congruent	NoFeedback	66	320.4591837
170	Familiar	Congruent	NoFeedback	67	309.257732
171	Familiar	Congruent	NoFeedback	68	298.0105263
172	Familiar	Congruent	NoFeedback	69	310.5353535
173	Familiar	Congruent	NoFeedback	70	302.4315789
174	Familiar	Congruent	NoFeedback	71	306.8210526
175	Familiar	Congruent	NoFeedback	72	312.7941176
176	Familiar	Congruent	NoFeedback	73	275.7368421
177	Familiar	Congruent	NoFeedback	74	322.6202532
178	Familiar	Congruent	NoFeedback	75	322.6477273
179	Familiar	Congruent	NoFeedback	76	281.1134021
180	Familiar	Congruent	NoFeedback	77	292.8367347
181	Familiar	Congruent	NoFeedback	78	318.1910112
182	Familiar	Congruent	NoFeedback	79	328.9818182
183	Familiar	Congruent	NoFeedback	80	304.7977528
184	Familiar	Congruent	NoFeedback	81	315.8409091
185	Familiar	Congruent	NoFeedback	82	308.1170213
186	Familiar	Congruent	NoFeedback	83	357.3417722
187	Familiar	Congruent	NoFeedback	84	287.4468085
188	Familiar	Congruent	NoFeedback	85	319.2736842
189	Familiar	Congruent	NoFeedback	86	296.0425532
190	Familiar	Congruent	NoFeedback	87	272.0412371
191	Familiar	Congruent	NoFeedback	88	295.021978
192	Familiar	Congruent	NoFeedback	89	274.6666667
193	Familiar	Congruent	NoFeedback	90	298.5
194	Familiar	Congruent	NoFeedback	91	304.606383
195	Familiar	Congruent	NoFeedback	92	289.7727273
196	Familiar	Congruent	NoFeedback	93	325.1868132
197	Familiar	Congruent	NoFeedback	94	314.3186813
198	Familiar	Congruent	NoFeedback	95	296.7731959
199	Familiar	Congruent	NoFeedback	96	293.35
200	Familiar	Congruent	NoFeedback	97	319.2837838
201	Familiar	Congruent	NoFeedback	98	323.25
202	Familiar	Congruent	NoFeedback	99	305.712766
203	Familiar	Congruent	NoFeedback	100	287.8695652
204	Familiar	Congruent	NoFeedback	101	305.4857143
205	Familiar	Congruent	NoFeedback	102	326.6046512
206	Familiar	Congruent	NoFeedback	103	308.4948454
207	Familiar	Congruent	NoFeedback	104	303.827957
208	Familiar	Congruent	NoFeedback	105	324
209	Familiar	Congruent	NoFeedback	106	350.825
210	Familiar	Incongruent	Feedback	1	298.9431818
211	Familiar	Incongruent	Feedback	2	301.030303
212	Familiar	Incongruent	Feedback	3	294.893617
213	Familiar	Incongruent	Feedback	4	282.8979592
214	Familiar	Incongruent	Feedback	5	280.4479167
215	Familiar	Incongruent	Feedback	6	291.78
216	Familiar	Incongruent	Feedback	7	299.5319149
217	Familiar	Incongruent	Feedback	8	317.5157895
218	Familiar	Incongruent	Feedback	9	262.8089888
219	Familiar	Incongruent	Feedback	10	299.9587629
220	Familiar	Incongruent	Feedback	11	302.2978723
221	Familiar	Incongruent	Feedback	12	270.9393939
222	Familiar	Incongruent	Feedback	13	309.5934066
223	Familiar	Incongruent	Feedback	14	278.2258065
224	Familiar	Incongruent	Feedback	15	298.1875
225	Familiar	Incongruent	Feedback	16	273.5858586
226	Familiar	Incongruent	Feedback	18	265.65
227	Familiar	Incongruent	Feedback	19	288.8210526
228	Familiar	Incongruent	Feedback	20	282.6666667
229	Familiar	Incongruent	Feedback	21	279.6021505
230	Familiar	Incongruent	Feedback	22	285.3737374
231	Familiar	Incongruent	Feedback	23	292.96
232	Familiar	Incongruent	Feedback	24	282.556701
233	Familiar	Incongruent	Feedback	25	283.5306122
234	Familiar	Incongruent	Feedback	26	291.3636364
235	Familiar	Incongruent	Feedback	27	297.6043956
236	Familiar	Incongruent	Feedback	28	289.8526316
237	Familiar	Incongruent	Feedback	29	296.6
238	Familiar	Incongruent	Feedback	30	315.0555556
239	Familiar	Incongruent	Feedback	31	331.4680851
240	Familiar	Incongruent	Feedback	32	274.0860215
241	Familiar	Incongruent	Feedback	33	302.4090909
242	Familiar	Incongruent	Feedback	34	282.8602151
243	Familiar	Incongruent	Feedback	35	314.969697
244	Familiar	Incongruent	Feedback	36	268.0843373
245	Familiar	Incongruent	Feedback	38	318.5
246	Familiar	Incongruent	Feedback	39	318.2421053
247	Familiar	Incongruent	Feedback	40	281.5625
248	Familiar	Incongruent	Feedback	41	301.5897436
249	Familiar	Incongruent	Feedback	42	278.5050505
250	Familiar	Incongruent	Feedback	43	293.7216495
251	Familiar	Incongruent	Feedback	44	289.7108434
252	Familiar	Incongruent	Feedback	45	282.0652174
253	Familiar	Incongruent	Feedback	46	293.5204082
254	Familiar	Incongruent	Feedback	47	266.4897959
255	Familiar	Incongruent	Feedback	48	304.6315789
256	Familiar	Incongruent	Feedback	49	279.2680412
257	Familiar	Incongruent	Feedback	50	313.5053763
258	Familiar	Incongruent	Feedback	51	274.0957447
259	Familiar	Incongruent	Feedback	52	278.1075269
260	Familiar	Incongruent	Feedback	53	278.1443299
261	Familiar	Incongruent	Feedback	54	304.393617
262	Familiar	Incongruent	Feedback	55	287.9456522
263	Familiar	Incongruent	Feedback	56	314.7407407
264	Familiar	Incongruent	Feedback	57	318.3043478
265	Familiar	Incongruent	Feedback	58	291.0808081
266	Familiar	Incongruent	Feedback	59	284.4375
267	Familiar	Incongruent	Feedback	60	262.8085106
268	Familiar	Incongruent	Feedback	61	301.0510204
269	Familiar	Incongruent	Feedback	62	304.3052632
270	Familiar	Incongruent	Feedback	63	281.7096774
271	Familiar	Incongruent	Feedback	64	263.8762887
272	Familiar	Incongruent	Feedback	65	307.3673469
273	Familiar	Incongruent	Feedback	66	317.3333333
274	Familiar	Incongruent	Feedback	67	259.5510204
275	Familiar	Incongruent	Feedback	68	303.9263158
276	Familiar	Incongruent	Feedback	69	284.9795918
277	Familiar	Incongruent	Feedback	70	292.9292929
278	Familiar	Incongruent	Feedback	71	311.4
279	Familiar	Incongruent	Feedback	72	289.8181818
280	Familiar	Incongruent	Feedback	73	265.8541667
281	Familiar	Incongruent	Feedback	74	311.6986301
282	Familiar	Incongruent	Feedback	75	312.5
283	Familiar	Incongruent	Feedback	76	287.1111111
284	Familiar	Incongruent	Feedback	77	283.3894737
285	Familiar	Incongruent	Feedback	78	319.7021277
286	Familiar	Incongruent	Feedback	79	321.4390244
287	Familiar	Incongruent	Feedback	80	300.2258065
288	Familiar	Incongruent	Feedback	81	296.625
289	Familiar	Incongruent	Feedback	82	288.5052632
290	Familiar	Incongruent	Feedback	83	347.2638889
291	Familiar	Incongruent	Feedback	84	282.8080808
292	Familiar	Incongruent	Feedback	85	308.2061856
293	Familiar	Incongruent	Feedback	86	313.3541667
294	Familiar	Incongruent	Feedback	87	249.7578947
295	Familiar	Incongruent	Feedback	88	274.3548387
296	Familiar	Incongruent	Feedback	89	286.9255319
297	Familiar	Incongruent	Feedback	90	295.6666667
298	Familiar	Incongruent	Feedback	91	307.1318681
299	Familiar	Incongruent	Feedback	92	292.625
300	Familiar	Incongruent	Feedback	93	305.1458333
301	Familiar	Incongruent	Feedback	94	309.3829787
302	Familiar	Incongruent	Feedback	95	290.9368421
303	Familiar	Incongruent	Feedback	96	285.4343434
304	Familiar	Incongruent	Feedback	97	312.9340659
305	Familiar	Incongruent	Feedback	98	295.8817204
306	Familiar	Incongruent	Feedback	99	302.7411765
307	Familiar	Incongruent	Feedback	100	299.6145833
308	Familiar	Incongruent	Feedback	101	275.2371134
309	Familiar	Incongruent	Feedback	102	305.1020408
310	Familiar	Incongruent	Feedback	103	312.3367347
311	Familiar	Incongruent	Feedback	104	279.2173913
312	Familiar	Incongruent	Feedback	105	323.4123711
313	Familiar	Incongruent	Feedback	106	289.3870968
314	Familiar	Incongruent	NoFeedback	1	295.5974026
315	Familiar	Incongruent	NoFeedback	2	306.1666667
316	Familiar	Incongruent	NoFeedback	3	302.0645161
317	Familiar	Incongruent	NoFeedback	4	313.8842105
318	Familiar	Incongruent	NoFeedback	5	303.6631579
319	Familiar	Incongruent	NoFeedback	6	322.1086957
320	Familiar	Incongruent	NoFeedback	7	302.1927711
321	Familiar	Incongruent	NoFeedback	8	322.2210526
322	Familiar	Incongruent	NoFeedback	9	297.9772727
323	Familiar	Incongruent	NoFeedback	10	307.1860465
324	Familiar	Incongruent	NoFeedback	11	314.7113402
325	Familiar	Incongruent	NoFeedback	12	310.28125
326	Familiar	Incongruent	NoFeedback	13	304.2134831
327	Familiar	Incongruent	NoFeedback	14	286.5543478
328	Familiar	Incongruent	NoFeedback	15	309.7
329	Familiar	Incongruent	NoFeedback	16	286.65625
330	Familiar	Incongruent	NoFeedback	18	286.8041237
331	Familiar	Incongruent	NoFeedback	19	325.5116279
332	Familiar	Incongruent	NoFeedback	20	279.5425532
333	Familiar	Incongruent	NoFeedback	21	294.2022472
334	Familiar	Incongruent	NoFeedback	22	274.6590909
335	Familiar	Incongruent	NoFeedback	23	308.0842105
336	Familiar	Incongruent	NoFeedback	24	300.6666667
337	Familiar	Incongruent	NoFeedback	25	292.0769231
338	Familiar	Incongruent	NoFeedback	26	294.7386364
339	Familiar	Incongruent	NoFeedback	27	314.6973684
340	Familiar	Incongruent	NoFeedback	28	299.0103093
341	Familiar	Incongruent	NoFeedback	29	323.9479167
342	Familiar	Incongruent	NoFeedback	30	313.4155844
343	Familiar	Incongruent	NoFeedback	31	329.6588235
344	Familiar	Incongruent	NoFeedback	32	290.5555556
345	Familiar	Incongruent	NoFeedback	33	309.2333333
346	Familiar	Incongruent	NoFeedback	34	305.5463918
347	Familiar	Incongruent	NoFeedback	35	298.9230769
348	Familiar	Incongruent	NoFeedback	36	292.2361111
350	Familiar	Incongruent	NoFeedback	38	306.7741935
351	Familiar	Incongruent	NoFeedback	39	321.3092784
352	Familiar	Incongruent	NoFeedback	40	305.4105263
353	Familiar	Incongruent	NoFeedback	41	303.7681159
354	Familiar	Incongruent	NoFeedback	42	285.576087
355	Familiar	Incongruent	NoFeedback	43	315.7708333
356	Familiar	Incongruent	NoFeedback	44	297.056338
357	Familiar	Incongruent	NoFeedback	45	291.3882353
358	Familiar	Incongruent	NoFeedback	46	314.3932584
359	Familiar	Incongruent	NoFeedback	47	261.021978
360	Familiar	Incongruent	NoFeedback	48	316.8372093
361	Familiar	Incongruent	NoFeedback	49	283.8297872
362	Familiar	Incongruent	NoFeedback	50	330
363	Familiar	Incongruent	NoFeedback	51	303.59375
364	Familiar	Incongruent	NoFeedback	52	311.5806452
365	Familiar	Incongruent	NoFeedback	53	288.5154639
366	Familiar	Incongruent	NoFeedback	54	325.6296296
367	Familiar	Incongruent	NoFeedback	55	306.6914894
368	Familiar	Incongruent	NoFeedback	56	294.8961039
369	Familiar	Incongruent	NoFeedback	57	322.8
370	Familiar	Incongruent	NoFeedback	58	304.4183673
371	Familiar	Incongruent	NoFeedback	59	307.1910112
372	Familiar	Incongruent	NoFeedback	60	277.9578947
373	Familiar	Incongruent	NoFeedback	61	349.2133333
374	Familiar	Incongruent	NoFeedback	62	320.9506173
375	Familiar	Incongruent	NoFeedback	63	265.6
376	Familiar	Incongruent	NoFeedback	64	284.2087912
377	Familiar	Incongruent	NoFeedback	65	306.8823529
378	Familiar	Incongruent	NoFeedback	66	307.6774194
379	Familiar	Incongruent	NoFeedback	67	289.0102041
380	Familiar	Incongruent	NoFeedback	68	289.7
381	Familiar	Incongruent	NoFeedback	69	310.7070707
382	Familiar	Incongruent	NoFeedback	70	312.5376344
383	Familiar	Incongruent	NoFeedback	71	306
384	Familiar	Incongruent	NoFeedback	72	296.1956522
385	Familiar	Incongruent	NoFeedback	73	296.2150538
386	Familiar	Incongruent	NoFeedback	74	331.902439
387	Familiar	Incongruent	NoFeedback	75	330.6708861
388	Familiar	Incongruent	NoFeedback	76	296.0103093
389	Familiar	Incongruent	NoFeedback	77	289.6210526
390	Familiar	Incongruent	NoFeedback	78	329.2179487
391	Familiar	Incongruent	NoFeedback	79	320.6666667
392	Familiar	Incongruent	NoFeedback	80	311.5172414
393	Familiar	Incongruent	NoFeedback	81	301.9456522
394	Familiar	Incongruent	NoFeedback	82	317.4698795
395	Familiar	Incongruent	NoFeedback	83	353.2307692
396	Familiar	Incongruent	NoFeedback	84	292.4536082
397	Familiar	Incongruent	NoFeedback	85	331.6842105
398	Familiar	Incongruent	NoFeedback	86	284.3626374
399	Familiar	Incongruent	NoFeedback	87	250.0224719
400	Familiar	Incongruent	NoFeedback	88	294.8522727
401	Familiar	Incongruent	NoFeedback	89	289.1162791
402	Familiar	Incongruent	NoFeedback	90	315.6363636
403	Familiar	Incongruent	NoFeedback	91	301.1910112
404	Familiar	Incongruent	NoFeedback	92	285.7956989
405	Familiar	Incongruent	NoFeedback	93	318.6595745
406	Familiar	Incongruent	NoFeedback	94	305.4175824
407	Familiar	Incongruent	NoFeedback	95	302.1770833
408	Familiar	Incongruent	NoFeedback	96	295.6122449
409	Familiar	Incongruent	NoFeedback	97	337.9230769
410	Familiar	Incongruent	NoFeedback	98	320.5243902
411	Familiar	Incongruent	NoFeedback	99	300.7875
412	Familiar	Incongruent	NoFeedback	100	310.1630435
413	Familiar	Incongruent	NoFeedback	101	318.961039
414	Familiar	Incongruent	NoFeedback	102	333.0632911
415	Familiar	Incongruent	NoFeedback	103	300.626506
416	Familiar	Incongruent	NoFeedback	104	308.9885057
417	Familiar	Incongruent	NoFeedback	105	320.9247312
418	Familiar	Incongruent	NoFeedback	106	320.1162791
419	Novel	Congruent	NoFeedback	1	325.6753247
420	Novel	Congruent	NoFeedback	2	305.8526316
421	Novel	Congruent	NoFeedback	3	300.5698925
422	Novel	Congruent	NoFeedback	4	310.9565217
423	Novel	Congruent	NoFeedback	5	308.3978495
424	Novel	Congruent	NoFeedback	6	347.1182796
425	Novel	Congruent	NoFeedback	7	313.6489362
426	Novel	Congruent	NoFeedback	8	333.2857143
427	Novel	Congruent	NoFeedback	9	317.9770115
428	Novel	Congruent	NoFeedback	10	302.0888889
429	Novel	Congruent	NoFeedback	11	321.0888889
430	Novel	Congruent	NoFeedback	12	298.6666667
431	Novel	Congruent	NoFeedback	13	331.75
432	Novel	Congruent	NoFeedback	14	307.6790123
433	Novel	Congruent	NoFeedback	15	321.1444444
434	Novel	Congruent	NoFeedback	16	293.2323232
436	Novel	Congruent	NoFeedback	18	282.0520833
437	Novel	Congruent	NoFeedback	19	308.4712644
438	Novel	Congruent	NoFeedback	20	291.393617
439	Novel	Congruent	NoFeedback	21	309.3617021
440	Novel	Congruent	NoFeedback	22	301.4946237
441	Novel	Congruent	NoFeedback	23	316.2474227
442	Novel	Congruent	NoFeedback	24	311.78125
443	Novel	Congruent	NoFeedback	25	288.7604167
444	Novel	Congruent	NoFeedback	26	305.505618
445	Novel	Congruent	NoFeedback	27	315.7160494
446	Novel	Congruent	NoFeedback	28	280.2391304
447	Novel	Congruent	NoFeedback	29	305.1318681
448	Novel	Congruent	NoFeedback	30	325.5180723
449	Novel	Congruent	NoFeedback	31	335.8666667
450	Novel	Congruent	NoFeedback	32	288.8202247
451	Novel	Congruent	NoFeedback	33	298.5
452	Novel	Congruent	NoFeedback	34	302.2886598
453	Novel	Congruent	NoFeedback	35	290.967033
454	Novel	Congruent	NoFeedback	36	241.3333333
456	Novel	Congruent	NoFeedback	38	310.0689655
457	Novel	Congruent	NoFeedback	39	309.2134831
458	Novel	Congruent	NoFeedback	40	298.2222222
459	Novel	Congruent	NoFeedback	41	302.5694444
460	Novel	Congruent	NoFeedback	42	286.076087
461	Novel	Congruent	NoFeedback	43	308.9893617
462	Novel	Congruent	NoFeedback	44	298.7671233
463	Novel	Congruent	NoFeedback	45	297.1573034
464	Novel	Congruent	NoFeedback	46	330.1234568
465	Novel	Congruent	NoFeedback	47	298.0978261
466	Novel	Congruent	NoFeedback	48	312.5432099
467	Novel	Congruent	NoFeedback	49	276.9587629
468	Novel	Congruent	NoFeedback	50	337.7045455
469	Novel	Congruent	NoFeedback	51	284.3232323
470	Novel	Congruent	NoFeedback	52	287.9489796
471	Novel	Congruent	NoFeedback	53	280.4226804
472	Novel	Congruent	NoFeedback	54	315.8924731
473	Novel	Congruent	NoFeedback	55	317.9156627
474	Novel	Congruent	NoFeedback	56	314.0704225
475	Novel	Congruent	NoFeedback	57	315.8152174
476	Novel	Congruent	NoFeedback	58	301.7916667
477	Novel	Congruent	NoFeedback	59	301.4731183
478	Novel	Congruent	NoFeedback	60	275.7395833
479	Novel	Congruent	NoFeedback	61	312.1546392
480	Novel	Congruent	NoFeedback	62	337.25
481	Novel	Congruent	NoFeedback	63	299.6813187
482	Novel	Congruent	NoFeedback	64	287.2934783
483	Novel	Congruent	NoFeedback	65	320.7934783
484	Novel	Congruent	NoFeedback	66	316.9347826
485	Novel	Congruent	NoFeedback	67	285.4105263
486	Novel	Congruent	NoFeedback	68	289.0352941
487	Novel	Congruent	NoFeedback	69	302.8709677
488	Novel	Congruent	NoFeedback	70	311.2222222
489	Novel	Congruent	NoFeedback	71	299.9255319
490	Novel	Congruent	NoFeedback	72	299.2444444
491	Novel	Congruent	NoFeedback	73	308.1590909
492	Novel	Congruent	NoFeedback	74	330.6296296
493	Novel	Congruent	NoFeedback	75	318.3625
494	Novel	Congruent	NoFeedback	76	268.3684211
495	Novel	Congruent	NoFeedback	77	282.2444444
496	Novel	Congruent	NoFeedback	78	324.3095238
497	Novel	Congruent	NoFeedback	79	321.7045455
498	Novel	Congruent	NoFeedback	80	317.4111111
499	Novel	Congruent	NoFeedback	81	318.7333333
500	Novel	Congruent	NoFeedback	82	303
501	Novel	Congruent	NoFeedback	83	366.3015873
502	Novel	Congruent	NoFeedback	84	292.59375
503	Novel	Congruent	NoFeedback	85	309.344086
504	Novel	Congruent	NoFeedback	86	312.0210526
505	Novel	Congruent	NoFeedback	87	272.8723404
506	Novel	Congruent	NoFeedback	88	300.4175824
507	Novel	Congruent	NoFeedback	89	314.9347826
508	Novel	Congruent	NoFeedback	90	319.0581395
509	Novel	Congruent	NoFeedback	91	297.0921053
510	Novel	Congruent	NoFeedback	92	279.1494253
511	Novel	Congruent	NoFeedback	93	328.7375
512	Novel	Congruent	NoFeedback	94	313.8764045
513	Novel	Congruent	NoFeedback	95	310.8913043
514	Novel	Congruent	NoFeedback	96	298.5918367
515	Novel	Congruent	NoFeedback	97	321.1463415
516	Novel	Congruent	NoFeedback	98	312.2777778
517	Novel	Congruent	NoFeedback	99	301.8764045
518	Novel	Congruent	NoFeedback	100	322.9789474
519	Novel	Congruent	NoFeedback	101	325.3928571
520	Novel	Congruent	NoFeedback	102	332.4942529
521	Novel	Congruent	NoFeedback	103	306.6813187
522	Novel	Congruent	NoFeedback	104	306.45
523	Novel	Congruent	NoFeedback	105	319
524	Novel	Congruent	NoFeedback	106	309.4150943
525	Novel	Incongruent	NoFeedback	1	308.9759036
526	Novel	Incongruent	NoFeedback	2	303.31
527	Novel	Incongruent	NoFeedback	3	301.989011
528	Novel	Incongruent	NoFeedback	4	289.6593407
529	Novel	Incongruent	NoFeedback	5	310.5684211
530	Novel	Incongruent	NoFeedback	6	326.8426966
531	Novel	Incongruent	NoFeedback	7	314.9255319
532	Novel	Incongruent	NoFeedback	8	327.3181818
533	Novel	Incongruent	NoFeedback	9	290.4457831
534	Novel	Incongruent	NoFeedback	10	309.5212766
535	Novel	Incongruent	NoFeedback	11	319.7142857
536	Novel	Incongruent	NoFeedback	12	312.0941176
537	Novel	Incongruent	NoFeedback	13	320.3777778
538	Novel	Incongruent	NoFeedback	14	314.8780488
539	Novel	Incongruent	NoFeedback	15	311.5368421
540	Novel	Incongruent	NoFeedback	16	302.3636364
542	Novel	Incongruent	NoFeedback	18	280.96
543	Novel	Incongruent	NoFeedback	19	307.3181818
544	Novel	Incongruent	NoFeedback	20	288.6170213
545	Novel	Incongruent	NoFeedback	21	292.09375
546	Novel	Incongruent	NoFeedback	22	312.989011
547	Novel	Incongruent	NoFeedback	23	295.8367347
548	Novel	Incongruent	NoFeedback	24	296.4536082
549	Novel	Incongruent	NoFeedback	25	300.3195876
550	Novel	Incongruent	NoFeedback	26	297.0105263
551	Novel	Incongruent	NoFeedback	27	319.1395349
552	Novel	Incongruent	NoFeedback	28	311.7608696
553	Novel	Incongruent	NoFeedback	29	311.0454545
554	Novel	Incongruent	NoFeedback	30	325.6818182
555	Novel	Incongruent	NoFeedback	31	329.816092
556	Novel	Incongruent	NoFeedback	32	290.4361702
557	Novel	Incongruent	NoFeedback	33	316.4096386
558	Novel	Incongruent	NoFeedback	34	278.1304348
559	Novel	Incongruent	NoFeedback	35	307.1276596
560	Novel	Incongruent	NoFeedback	36	217.3780488
562	Novel	Incongruent	NoFeedback	38	304.1931818
563	Novel	Incongruent	NoFeedback	39	309.606383
564	Novel	Incongruent	NoFeedback	40	316.988764
565	Novel	Incongruent	NoFeedback	41	308.3611111
566	Novel	Incongruent	NoFeedback	42	287.1702128
567	Novel	Incongruent	NoFeedback	43	308.4574468
568	Novel	Incongruent	NoFeedback	44	298.4556962
569	Novel	Incongruent	NoFeedback	45	297
570	Novel	Incongruent	NoFeedback	46	324.3037975
571	Novel	Incongruent	NoFeedback	47	298.1595745
572	Novel	Incongruent	NoFeedback	48	317.8068182
573	Novel	Incongruent	NoFeedback	49	277.0526316
574	Novel	Incongruent	NoFeedback	50	318.1978022
575	Novel	Incongruent	NoFeedback	51	279.9270833
576	Novel	Incongruent	NoFeedback	52	300.9578947
577	Novel	Incongruent	NoFeedback	53	293.6565657
578	Novel	Incongruent	NoFeedback	54	324.0217391
579	Novel	Incongruent	NoFeedback	55	305.9111111
580	Novel	Incongruent	NoFeedback	56	329.4285714
581	Novel	Incongruent	NoFeedback	57	313.6111111
582	Novel	Incongruent	NoFeedback	58	304.8315789
583	Novel	Incongruent	NoFeedback	59	293.7553191
584	Novel	Incongruent	NoFeedback	60	279.7234043
585	Novel	Incongruent	NoFeedback	61	317.5632184
586	Novel	Incongruent	NoFeedback	62	326.7159091
587	Novel	Incongruent	NoFeedback	63	320.4222222
588	Novel	Incongruent	NoFeedback	64	295.5483871
589	Novel	Incongruent	NoFeedback	65	321.8953488
590	Novel	Incongruent	NoFeedback	66	319.5280899
591	Novel	Incongruent	NoFeedback	67	288.0808081
592	Novel	Incongruent	NoFeedback	68	301.6263736
593	Novel	Incongruent	NoFeedback	69	297.9157895
594	Novel	Incongruent	NoFeedback	70	314.9578947
595	Novel	Incongruent	NoFeedback	71	301.9555556
596	Novel	Incongruent	NoFeedback	72	300.7586207
597	Novel	Incongruent	NoFeedback	73	299.5666667
598	Novel	Incongruent	NoFeedback	74	309.6363636
599	Novel	Incongruent	NoFeedback	75	319.2705882
600	Novel	Incongruent	NoFeedback	76	277.0515464
601	Novel	Incongruent	NoFeedback	77	304.2826087
602	Novel	Incongruent	NoFeedback	78	317.5243902
603	Novel	Incongruent	NoFeedback	79	311.5802469
604	Novel	Incongruent	NoFeedback	80	323.4814815
605	Novel	Incongruent	NoFeedback	81	317.8571429
606	Novel	Incongruent	NoFeedback	82	309.3424658
607	Novel	Incongruent	NoFeedback	83	363.5675676
608	Novel	Incongruent	NoFeedback	84	283.4842105
609	Novel	Incongruent	NoFeedback	85	299.8105263
610	Novel	Incongruent	NoFeedback	86	300.9784946
611	Novel	Incongruent	NoFeedback	87	293.7263158
612	Novel	Incongruent	NoFeedback	88	305.7066667
613	Novel	Incongruent	NoFeedback	89	305.5888889
614	Novel	Incongruent	NoFeedback	90	305.3333333
615	Novel	Incongruent	NoFeedback	91	291.8518519
616	Novel	Incongruent	NoFeedback	92	279.606383
617	Novel	Incongruent	NoFeedback	93	330.0705882
618	Novel	Incongruent	NoFeedback	94	327.4725275
619	Novel	Incongruent	NoFeedback	95	306.5104167
620	Novel	Incongruent	NoFeedback	96	293.244898
621	Novel	Incongruent	NoFeedback	97	317.8235294
622	Novel	Incongruent	NoFeedback	98	313.8888889
623	Novel	Incongruent	NoFeedback	99	301.1190476
624	Novel	Incongruent	NoFeedback	100	301.4516129
625	Novel	Incongruent	NoFeedback	101	312.0757576
626	Novel	Incongruent	NoFeedback	102	326.5402299
627	Novel	Incongruent	NoFeedback	103	311.5833333
628	Novel	Incongruent	NoFeedback	104	309.7222222
629	Novel	Incongruent	NoFeedback	105	328.1958763
630	Novel	Incongruent	NoFeedback	106	301.5324675
