# Supplementary material for: Habit Expression and Disruption as a Function of Attention-Deficit/Hyperactivity Disorder Symptomology
Source: Front Psychol. 2019 Sep 3;10:1997. doi: 10.3389/fpsyg.2019.01997 (PMC6733985; doi:10.3389/fpsyg.2019.01997)
Supplement: Supplementary file 1 [file Data_Sheet_1.ZIP › README.txt]

Analysis scripts and output for the data reported in
"Habit Expression and Disruption as a Function of Attention-Deficit/Hyperactivity Disorder Symptomology"
Ahmet O. Ceceli, Giavanna Esposito, & Elizabeth Tricomi

The .csv and .xlsx data files serve as inputs for the python and R notebooks located in this folder.
These files must remain in the same folder as the notebooks for the scripts to execute.
Please use Jupyter notebook with Python and R for optimal interaction with the data shared here.
The html output can be used to view the scripts and output without Jupyter. 
The code can also be copy-pasted from html to a standalone Python and/or R environment.
